# Supplementary material for: Physiological and Transcriptomic Analyses Reveal Commonalities and Specificities in Wheat in Response to Aluminum and Manganese
Source: Preprints.org preprint supplement (doi:10.20944/preprints202312.0299.v1), 2023-12-06
Supplement: Supplementary file 1 [file supplementary]

## Sheet: S2-1 DEGs of Mn_vs_Al
Total DEGs of Al
Gene_id	Al	CK	FCAl/CK	Gene_description	GO_id	GO_term	KO_id	KO_name	Pathway_id	Pathway_definition	COG_id	COG_Functional Categories	NR_hit-name	NR_description	Swiss-Prot_hit-name	Swiss-Prot_description	Pfam_id	Domain	Domain description
ENSRNA050020189	2.34417	0.271667	3.10916	U1 spliceosomal RNA	------	------	------	------	------	------	ENOG41108PI	S:Function unknown	KAB8094435.1	hypothetical protein EE612_021615 [Oryza sativa]	------	------	------	------	------
ENSRNA050024758	0.066667	0.773333	-3.53605	Eukaryotic large subunit ribosomal RNA	------	------	------	------	------	------	ENOG4111JHC;ENOG4111SG9	S:Function unknown;	KAG8363053.1	hypothetical protein BUALT_BualtUnG0008600 [Buddleja alternifolia]	sp|Q8TGM7|ART2_YEAST;	Putative uncharacterized protein ART2 OS=Saccharomyces cerevisiae;	------	------	------
TraesCS1A02G003800	0.546667	2.64167	-2.27271	-	GO:0006529;GO:0016021;GO:0005829;GO:0004066;GO:0016887;GO:000552	BP:asparagine biosynthetic process;CC:integral component of membrane;CC:cytosol;MF:asparagine synthas;MF:ATPase activity;MF:ATP binding;	------	------	------	------	COG0465	O:Posttranslational modification, protein turnover, chaperones	KAF6981586.1	hypothetical protein CFC21_000047 [Triticum aestivum]	sp|Q9FLD5|ASD_ARATH;	AAA-ATPase ASD, mitochondrial OS=Arabidopsis thaliana OX=3702 GN=AATP1 PE=1 SV=1;	PF14363.8;PF00004.31;PF13191.8;PF05496.14;PF00910.24;PF20030.1	AAA_assoc;AAA;AAA_16;RuvB_N;RNA_helicase;bpMoxR	Domain associated at C-terminal with AAA;ATPase family associated with various cellular activities;AAA ATPase domain;Holliday junction DNA helicase RuvB P-loop domain;RNA helicase;MoxR domain in the MoxR-vWA-beta-propeller ternary systems
TraesCS1A02G006000	1.28417	0.478333	1.42475	-	GO:0006468;GO:0016021;GO:0005524;GO:0005515;GO:000467	BP:protein phosphorylation;CC:integral component of membrane;MF:ATP binding;MF:protein binding;MF:protein kinase activity;	------	------	------	------	COG4886	S:Function unknown	KAF6981626.1	hypothetical protein CFC21_000083 [Triticum aestivum]	sp|Q8VZG8|MIK2_ARATH;	MDIS1-interacting receptor like kinase 2 OS=Arabidopsis thaliana OX=3702 GN=MIK2 PE=1 SV=3;	PF13855.8;PF12799.9;PF00069.27;PF07714.19;PF08263.14	LRR_8;LRR_4;Pkinase;PK_Tyr_Ser-Thr;LRRNT_2	Leucine rich repeat;Leucine Rich repeats;Protein kinase domain;Protein tyrosine and serine/threonine kinase;Leucine rich repeat N-terminal domain
TraesCS1A02G006800	0.1075	0.0075	3.8413	-	GO:0006468;GO:0016021;GO:0005524;GO:0005515;GO:000467	BP:protein phosphorylation;CC:integral component of membrane;MF:ATP binding;MF:protein binding;MF:protein kinase activity;	------	------	------	------	------	------	KAF6981632.1	hypothetical protein CFC21_000089 [Triticum aestivum]	sp|Q8VZG8|MIK2_ARATH;	MDIS1-interacting receptor like kinase 2 OS=Arabidopsis thaliana OX=3702 GN=MIK2 PE=1 SV=3;	PF13855.8;PF00069.27;PF07714.19;PF12799.9;PF08263.14	LRR_8;Pkinase;PK_Tyr_Ser-Thr;LRR_4;LRRNT_2	Leucine rich repeat;Protein kinase domain;Protein tyrosine and serine/threonine kinase;Leucine Rich repeats;Leucine rich repeat N-terminal domain
TraesCS1A02G009700	0.865	4.71917	-2.44776	-	------	------	------	------	------	------	------	------	KAF6981669.1	hypothetical protein CFC21_000131 [Triticum aestivum]	------	------	------	------	------
TraesCS1A02G014800	0.259167	1.39	-2.42313	Defensin [Source:UniProtKB/TrEMBL;Acc:W4ZXA3]	GO:0006952;GO:0055073;GO:0005615;GO:004687	BP:defense response;BP:cadmium ion homeostasis;CC:extracellular space;MF:cadmium ion binding;	------	------	------	------	ENOG411075P;ENOG41105Z5;ENOG410YS8Z	S:Function unknown;	AIA66987.1	defensin [Triticum aestivum]	sp|Q6K209|CAL1_ORYSJ;	Defensin-like protein CAL1 OS=Oryza sativa subsp. japonica OX=39947 GN=CAL1 PE=1 SV=1;	PF00304.22	Gamma-thionin	Gamma-thionin family
TraesCS1A02G014900	0.5775	0.006667	6.43664	-	GO:0006468;GO:0048544;GO:0016021;GO:0004674;GO:0106311;GO:0004672;GO:0005524;GO:010631	BP:protein phosphorylation;BP:recognition of pollen;CC:integral component of membrane;MF:protein serine/threonine kinase activity;MF:old GO;MF:protein kinase activity;MF:ATP binding;MF:old GO;	------	------	------	------	COG0515	T:Signal transduction mechanisms	KAF6981729.1	hypothetical protein CFC21_000188 [Triticum aestivum]	sp|O64477|Y2913_ARATH;	G-type lectin S-receptor-like serine/threonine-protein kinase At2g19130 OS=Arabidopsis thaliana OX=3702 GN=At2g19130 PE=2 SV=1;	PF00069.27;PF07714.19;PF01453.26;PF08276.13;PF00954.22;PF00024.28	Pkinase;PK_Tyr_Ser-Thr;B_lectin;PAN_2;S_locus_glycop;PAN_1	Protein kinase domain;Protein tyrosine and serine/threonine kinase;D-mannose binding lectin;PAN-like domain;S-locus glycoprotein domain;PAN domain
TraesCS1A02G015000	0.220833	0.006667	5.04977	Serine/threonine-protein kinase [Source:UniProtKB/TrEMBL;Acc:A0A1D5S2M5]	GO:0006468;GO:0048544;GO:0016021;GO:0004674;GO:0106311;GO:0004672;GO:0106310;GO:000552	BP:protein phosphorylation;BP:recognition of pollen;CC:integral component of membrane;MF:protein serine/threonine kinase activity;MF:old GO;MF:protein kinase activity;MF:old GO;MF:ATP binding;	------	------	------	------	COG0515	T:Signal transduction mechanisms	KAF6981730.1	hypothetical protein CFC21_000189 [Triticum aestivum]	sp|O64477|Y2913_ARATH;	G-type lectin S-receptor-like serine/threonine-protein kinase At2g19130 OS=Arabidopsis thaliana OX=3702 GN=At2g19130 PE=2 SV=1;	PF00069.27;PF07714.19;PF01453.26;PF08276.13;PF00954.22;PF03109.18	Pkinase;PK_Tyr_Ser-Thr;B_lectin;PAN_2;S_locus_glycop;ABC1	Protein kinase domain;Protein tyrosine and serine/threonine kinase;D-mannose binding lectin;PAN-like domain;S-locus glycoprotein domain;ABC1 atypical kinase-like domain
TraesCS1A02G029900	0.17	0.015	3.5025	Protein DETOXIFICATION [Source:UniProtKB/TrEMBL;Acc:W4ZYL7]	GO:0055085;GO:0016021;GO:0016020;GO:0015297;GO:0015238;GO:0022857;GO:004291	BP:transmembrane transport;CC:integral component of membrane;CC:membrane;MF:antiporter activity;MF:drug transmembrane transporter activity;MF:transmembrane transporter activity;MF:xenobiotic transporter activity;	K03327	TC.MATE, SLC47A, norM, mdtK, dinF	------	------	COG0534	V:Defense mechanisms	XP_037471260.1	protein DETOXIFICATION 40-like [Triticum dicoccoides]	sp|Q9LVD9|DTX40_ARATH;	Protein DETOXIFICATION 40 OS=Arabidopsis thaliana OX=3702 GN=DTX40 PE=1 SV=1;	PF01554.20	MatE	MatE
TraesCS1A02G031100	0.059167	0.914167	-3.94959	-	GO:0006508;GO:000823	BP:proteolysis;MF:cysteine-type peptidase activity;	------	------	------	------	COG4870	O:Posttranslational modification, protein turnover, chaperones	KAF6981920.1	hypothetical protein CFC21_000366 [Triticum aestivum]	sp|Q9FJ47|SAG12_ARATH;	Senescence-specific cysteine protease SAG12 OS=Arabidopsis thaliana OX=3702 GN=SAG12 PE=1 SV=1;	PF00112.25;PF08246.14;PF03051.17	Peptidase_C1;Inhibitor_I29;Peptidase_C1_2	Papain family cysteine protease;Cathepsin propeptide inhibitor domain;Peptidase C1-like family
TraesCS1A02G032600	0.500833	0.194167	1.36703	-	GO:001649	MF:oxidoreductase activity;	------	------	------	------	ENOG4111XIV	S:Function unknown	KAF6981935.1	hypothetical protein CFC21_000381 [Triticum aestivum]	------	------	PF03171.22	2OG-FeII_Oxy	2OG-F
TraesCS1A02G035100	7.88917	3.175	1.31312	-	GO:0006897;GO:0006900;GO:0072583;GO:0048268;GO:0005794;GO:0005905;GO:0030136;GO:0000149;GO:0005543;GO:0032050;GO:0005545;GO:0005546;GO:003027	BP:endocytosis;BP:membrane budding;BP:clathrin-dependent endocytosis;BP:clathrin coat assembly;CC:Golgi apparatus;CC:clathrin-coated pit;CC:clathrin-coated vesicle;MF:SNARE binding;MF:phospholipid binding;MF:clathrin heavy chain binding;MF:1-phosphatidylinositol binding;MF:phosphatidylinositol-4,5-bisphosphate binding;MF:clathrin binding;	------	------	------	------	ENOG410XQ90	U:Intracellular trafficking, secretion, and vesicular transport	KAF6981965.1	hypothetical protein CFC21_000411 [Triticum aestivum]	sp|Q8S9J8|CAP1_ARATH;	Probable clathrin assembly protein At4g32285 OS=Arabidopsis thaliana OX=3702 GN=At4g32285 PE=1 SV=2;	PF07651.18	ANTH	ANTH domain
TraesCS1A02G037700	17.4183	5.42083	1.68402	Phenylalanine ammonia-lyase [Source:UniProtKB/TrEMBL;Acc:A0A1D5S0U3]	GO:0006559;GO:0009800;GO:0005737;GO:0016841;GO:0003824;GO:004554	BP:L-phenylalanine catabolic process;BP:cinnamic acid biosynthetic process;CC:cytoplasm;MF:ammonia-lyase activity;MF:catalytic activity;MF:phenylalanine ammonia-lyase activity;	K10775	PAL	map00940;map00360	Phenylpropanoid biosynthesis;Phenylalanine metabolism	------	------	KAF6982000.1	hypothetical protein CFC21_000441 [Triticum aestivum]	sp|Q43210|PALY_WHEAT;	Phenylalanine ammonia-lyase OS=Triticum aestivum OX=4565 GN=PAL PE=3 SV=1;	PF00221.21	Lyase_aromatic	Aromatic amino acid lyase
TraesCS1A02G037800	44.4767	13.0358	1.77057	Phenylalanine ammonia-lyase [Source:UniProtKB/TrEMBL;Acc:W4ZZ52]	GO:0006559;GO:0009800;GO:0005737;GO:0016841;GO:0003824;GO:004554	BP:L-phenylalanine catabolic process;BP:cinnamic acid biosynthetic process;CC:cytoplasm;MF:ammonia-lyase activity;MF:catalytic activity;MF:phenylalanine ammonia-lyase activity;	K10775	PAL	map00940;map00360	Phenylpropanoid biosynthesis;Phenylalanine metabolism	------	------	KAF6982001.1	hypothetical protein CFC21_000442 [Triticum aestivum]	sp|Q43210|PALY_WHEAT;	Phenylalanine ammonia-lyase OS=Triticum aestivum OX=4565 GN=PAL PE=3 SV=1;	PF00221.21	Lyase_aromatic	Aromatic amino acid lyase
TraesCS1A02G040100	5.87833	26.5375	-2.17455	-	------	------	------	------	------	------	COG5048	S:Function unknown	KAF6982030.1	hypothetical protein CFC21_000467 [Triticum aestivum]	sp|Q681X4|ZAT5_ARATH;	Zinc finger protein ZAT5 OS=Arabidopsis thaliana OX=3702 GN=ZAT5 PE=2 SV=1;	PF13912.8;PF13894.8;PF00096.28	zf-C2H2_6;zf-C2H2_4;zf-C2H2	C2H2-type zinc finger;C2H2-type zinc finger;Zinc finger, C2H2 type
TraesCS1A02G045800	5.905	16.82	-1.51017	-	GO:004573	MF:nutrient reservoir activity;	------	------	------	------	ENOG410YDMX	S:Function unknown	KAF6982096.1	hypothetical protein CFC21_000531 [Triticum aestivum]	sp|Q6K508|GLUD1_ORYSJ;	Glutelin type-D 1 OS=Oryza sativa subsp. japonica OX=39947 GN=GLUD1 PE=2 SV=1;	PF00190.24;PF07883.13	Cupin_1;Cupin_2	Cupin;Cupin domain
TraesCS1A02G046800	3.04167	1.25417	1.27813	-	GO:0003352;GO:001602	BP:regulation of cilium movement;CC:integral component of membrane;	------	------	------	------	ENOG411019U	S:Function unknown	XP_037480020.1	cilia- and flagella-associated protein 298-like [Triticum dicoccoides]	sp|Q8BL95|CF298_MOUSE;	Cilia- and flagella-associated protein 298 OS=Mus musculus OX=10090 GN=Cfap298 PE=1 SV=1;	PF11069.10	CFAP298	Cilia- and flagella-associated protein 298
TraesCS1A02G047300	0.184167	0.033333	2.46599	-	GO:0016021;GO:0004497;GO:0016705;GO:0005506;GO:002003	CC:integral component of membrane;MF:monooxygenase activity;MF:oxidoreductase activity, acting on paired donors, with incorporation or reduction of molecular oxygen;MF:iron ion binding;MF:heme binding;	------	------	------	------	COG2124	Q:Secondary metabolites biosynthesis, transport and catabolism	KAF6982117.1	hypothetical protein CFC21_000548 [Triticum aestivum]	sp|Q8VWZ7|C76B6_CATRO;	Geraniol 8-hydroxylase OS=Catharanthus roseus OX=4058 GN=CYP76B6 PE=1 SV=1;	PF00067.24	p450	Cytochrome P450
TraesCS1A02G048000	3.61417	1.2025	1.58763	-	GO:0006468;GO:0042742;GO:0002229;GO:0016021;GO:0005886;GO:0004672;GO:0030246;GO:0004675;GO:000552	BP:protein phosphorylation;BP:defense response to bacterium;BP:defense response to oomycetes;CC:integral component of membrane;CC:plasma membrane;MF:protein kinase activity;MF:carbohydrate binding;MF:transmembrane receptor protein serine/threonine kinase activity;MF:ATP binding;	------	------	------	------	COG0515	T:Signal transduction mechanisms	KAF6982120.1	hypothetical protein CFC21_000552 [Triticum aestivum]	sp|Q7XUN6|SIT2_ORYSJ;	L-type lectin-domain containing receptor kinase SIT2 OS=Oryza sativa subsp. japonica OX=39947 GN=SIT2 PE=2 SV=2;	PF00139.21;PF00069.27;PF07714.19	Lectin_legB;Pkinase;PK_Tyr_Ser-Thr	Legume lectin domain;Protein kinase domain;Protein tyrosine and serine/threonine kinase
TraesCS1A02G048100	4.44833	0.7175	2.63221	-	GO:0006468;GO:0042742;GO:0002229;GO:0016021;GO:0005886;GO:0004672;GO:0030246;GO:0004675;GO:000552	BP:protein phosphorylation;BP:defense response to bacterium;BP:defense response to oomycetes;CC:integral component of membrane;CC:plasma membrane;MF:protein kinase activity;MF:carbohydrate binding;MF:transmembrane receptor protein serine/threonine kinase activity;MF:ATP binding;	------	------	------	------	COG0515	T:Signal transduction mechanisms	KAF6982121.1	hypothetical protein CFC21_000553 [Triticum aestivum]	sp|Q7XUN6|SIT2_ORYSJ;	L-type lectin-domain containing receptor kinase SIT2 OS=Oryza sativa subsp. japonica OX=39947 GN=SIT2 PE=2 SV=2;	PF00139.21;PF00069.27;PF07714.19	Lectin_legB;Pkinase;PK_Tyr_Ser-Thr	Legume lectin domain;Protein kinase domain;Protein tyrosine and serine/threonine kinase
TraesCS1A02G049700	77.8208	32.5542	1.25731	-	GO:0000398;GO:0016607;GO:0008270;GO:0003723;GO:0003676;GO:000372	BP:mRNA splicing, via spliceosome;CC:nuclear speck;MF:zinc ion binding;MF:RNA binding;MF:nucleic acid binding;MF:mRNA binding;	K12896	SRSF7, SFRS7	map03040	Spliceosome	ENOG4111N8Y	S:Function unknown	KAF6982142.1	hypothetical protein CFC21_000570 [Triticum aestivum]	sp|Q8VYA5|RSZ33_ARATH;	Serine/arginine-rich splicing factor RS2Z33 OS=Arabidopsis thaliana OX=3702 GN=RS2Z33 PE=1 SV=1;	PF00076.24;PF00098.25;PF14787.8	RRM_1;zf-CCHC;zf-CCHC_5	RNA recognition motif.;Zinc knuckle;GAG-polyprotein viral zinc-finger
TraesCS1A02G049800	0.210833	0.618333	-1.55228	-	GO:0005975;GO:000455	BP:carbohydrate metabolic process;MF:hydrolase activity, hydrolyzing O-glycosyl compounds;	------	------	------	------	ENOG4111BDN	G:Carbohydrate transport and metabolism	KAF6982143.1	hypothetical protein CFC21_000571 [Triticum aestivum]	sp|Q8L868|E1311_ARATH;	Glucan endo-1,3-beta-glucosidase 11 OS=Arabidopsis thaliana OX=3702 GN=At1g32860 PE=2 SV=1;	PF00332.20	Glyco_hydro_17	Glycosyl hydrolases family 17
TraesCS1A02G051400	0.0875	0.179167	-1.03395	-	GO:000377	MF:actin binding;	------	------	------	------	ENOG410Y9Y9	S:Function unknown	KAF6982161.1	hypothetical protein CFC21_000587 [Triticum aestivum]	sp|P0DMS1|NET2A_ARATH;	Protein NETWORKED 2A OS=Arabidopsis thaliana OX=3702 GN=NET2A PE=2 SV=1;	PF07765.14	KIP1	KIP1-like protein
TraesCS1A02G051500	21.9258	9.44333	1.21526	-	GO:0051131;GO:0006457;GO:0005634;GO:0005829;GO:0051087;GO:005187	BP:chaperone-mediated protein complex assembly;BP:protein folding;CC:nucleus;CC:cytosol;MF:chaperone binding;MF:Hsp90 protein binding;	------	------	------	------	ENOG41121RT	S:Function unknown	VAH01220.1	unnamed protein product [Triticum turgidum subsp. durum]	sp|Q9FR62|P23A_BRANA;	Co-chaperone protein p23-1 OS=Brassica napus OX=3708 GN=P23-1 PE=1 SV=1;	PF04969.18	CS	CS domain
TraesCS1A02G056400	0.894167	4.73	-2.40322	-	GO:001602	CC:integral component of membrane;	------	------	------	------	ENOG41104ZJ;ENOG411080I	S:Function unknown;	KAF6982213.1	hypothetical protein CFC21_000633 [Triticum aestivum]	------	------	------	------	------
TraesCS1A02G058400	7.80833	18.1442	-1.21642	-	GO:0006355;GO:0006351;GO:0005634;GO:0003700;GO:000367	BP:regulation of transcription, DNA-templated;BP:transcription, DNA-templated;CC:nucleus;MF:transcription factor activity, sequence-specific DNA binding;MF:DNA binding;	K09284	AP2	------	------	ENOG410YD13	K:Transcription	VAH01401.1	unnamed protein product [Triticum turgidum subsp. durum]	sp|B8AXC3|AP21_ORYSI;	APETALA2-like protein 1 OS=Oryza sativa subsp. indica OX=39946 GN=AP2-1 PE=2 SV=2;	PF00847.22	AP2	AP2 domain
TraesCS1A02G069500	0.785833	0.273333	1.52356	-	------	------	------	------	------	------	ENOG410ZCW9	S:Function unknown	XP_037484301.1	uncharacterized protein LOC119363100 [Triticum dicoccoides]	------	------	PF14383.8	VARLMGL	DUF761-associated sequence motif
TraesCS1A02G069600	51.205	24.7667	1.04788	-	GO:0046872;GO:0005515;GO:000367	MF:metal ion binding;MF:protein binding;MF:DNA binding;	------	------	------	------	ENOG410XR0Z	S:Function unknown	XP_037484308.1	zinc finger CCCH domain-containing protein 33-like isoform X1 [Triticum dicoccoides]	sp|Q688R3|C3H33_ORYSJ;	Zinc finger CCCH domain-containing protein 33 OS=Oryza sativa subsp. japonica OX=39947 GN=Os05g0128200 PE=2 SV=1;	PF00642.26;PF13857.8;PF18044.3	zf-CCCH;Ank_5;zf-CCCH_4	Zinc finger C-x8-C-x5-C-x3-H type;Ankyrin repeats;CCCH-type zinc finger
TraesCS1A02G070400	79.135	24.12	1.71409	-	GO:0006355;GO:0050896;GO:0005634;GO:0043565;GO:0003700;GO:000367	BP:regulation of transcription, DNA-templated;BP:response to stimulus;CC:nucleus;MF:sequence-specific DNA binding;MF:transcription factor activity, sequence-specific DNA binding;MF:DNA binding;	K13424	WRKY33	map04016;map04626	MAPK signaling pathway - plant;Plant-pathogen interaction	ENOG4112BTF	K:Transcription	KAF6982392.1	hypothetical protein CFC21_000788 [Triticum aestivum]	sp|Q6IEQ7|WRK24_ORYSJ;	WRKY transcription factor WRKY24 OS=Oryza sativa subsp. japonica OX=39947 GN=WRKY24 PE=2 SV=1;	PF03106.17	WRKY	WRKY DNA -binding domain
TraesCS1A02G070600	16.9633	7.38083	1.20056	-	GO:0006468;GO:0016021;GO:0004674;GO:0005524;GO:000467	BP:protein phosphorylation;CC:integral component of membrane;MF:protein serine/threonine kinase activity;MF:ATP binding;MF:protein kinase activity;	------	------	------	------	COG0515	T:Signal transduction mechanisms	VAH01676.1	unnamed protein product [Triticum turgidum subsp. durum]	sp|Q9LY50|ACCR3_ARATH;	Putative serine/threonine-protein kinase-like protein CCR3 OS=Arabidopsis thaliana OX=3702 GN=CCR3 PE=2 SV=1;	PF00069.27;PF07714.19;PF03109.18	Pkinase;PK_Tyr_Ser-Thr;ABC1	Protein kinase domain;Protein tyrosine and serine/threonine kinase;ABC1 atypical kinase-like domain
TraesCS1A02G076200	6.00167	2.13333	1.49225	-	GO:0006355;GO:0005634;GO:0003700;GO:0043565;GO:000367	BP:regulation of transcription, DNA-templated;CC:nucleus;MF:transcription factor activity, sequence-specific DNA binding;MF:sequence-specific DNA binding;MF:DNA binding;	K09422	MYBP	------	------	COG5147	K:Transcription	KAF6982468.1	hypothetical protein CFC21_000849 [Triticum aestivum]	sp|Q10MB4|MYB2_ORYSJ;	Transcription factor MYB2 OS=Oryza sativa subsp. japonica OX=39947 GN=MYB2 PE=2 SV=1;	PF00249.33;PF13921.8	Myb_DNA-binding;Myb_DNA-bind_6	Myb-like DNA-binding domain;Myb-like DNA-binding domain
TraesCS1A02G076300	2.05917	0.575833	1.83834	-	------	------	------	------	------	------	------	------	KAF6982469.1	hypothetical protein CFC21_000850 [Triticum aestivum]	------	------	------	------	------
TraesCS1A02G076500	3.89667	1.88167	1.05023	-	GO:0006952;GO:0005524;GO:004353	BP:defense response;MF:ATP binding;MF:ADP binding;	------	------	------	------	COG4886	S:Function unknown	KAF6982472.1	hypothetical protein CFC21_000853 [Triticum aestivum]	sp|Q9M667|RPP13_ARATH;	Disease resistance protein RPP13 OS=Arabidopsis thaliana OX=3702 GN=RPP13 PE=2 SV=2;	PF00931.24;PF18052.3;PF13191.8	NB-ARC;Rx_N;AAA_16	NB-ARC domain;Rx N-terminal domain;AAA ATPase domain
TraesCS1A02G077700	14.4008	40.4983	-1.49171	Peroxidase [Source:UniProtKB/TrEMBL;Acc:W4ZWP5]	GO:0006979;GO:0042744;GO:0005576;GO:0009505;GO:0009506;GO:0020037;GO:0046872;GO:000460	BP:response to oxidative stress;BP:hydrogen peroxide catabolic process;CC:extracellular region;CC:plant-type cell wall;CC:plasmodesma;MF:heme binding;MF:metal ion binding;MF:peroxidase activity;	K00430	E1.11.1.7	map00940	Phenylpropanoid biosynthesis	ENOG41107NU	S:Function unknown	XP_037485191.1	peroxidase 2-like [Triticum dicoccoides]	sp|Q9FEQ8|PER2_MAIZE;	Peroxidase 2 OS=Zea mays OX=4577 GN=PER2 PE=2 SV=1;	PF00141.25	peroxidase	Peroxidase
TraesCS1A02G077900	0.0525	0.465	-3.14684	Peroxidase [Source:UniProtKB/TrEMBL;Acc:A0A1D5S297]	GO:0006979;GO:0042744;GO:0005576;GO:0009505;GO:0009506;GO:0020037;GO:0046872;GO:000460	BP:response to oxidative stress;BP:hydrogen peroxide catabolic process;CC:extracellular region;CC:plant-type cell wall;CC:plasmodesma;MF:heme binding;MF:metal ion binding;MF:peroxidase activity;	------	------	------	------	ENOG41104H3	S:Function unknown	KAF6982490.1	hypothetical protein CFC21_000869 [Triticum aestivum]	sp|A7QEU4|PER5_VITVI;	Peroxidase 5 OS=Vitis vinifera OX=29760 GN=GSVIVT00037159001 PE=1 SV=2;	PF00141.25	peroxidase	Peroxidase
TraesCS1A02G079400	0.258333	0.7425	-1.52316	Peroxidase [Source:UniProtKB/TrEMBL;Acc:W4ZWL4]	GO:0006979;GO:0042744;GO:0016021;GO:0005576;GO:0009505;GO:0009506;GO:0020037;GO:0046872;GO:000460	BP:response to oxidative stress;BP:hydrogen peroxide catabolic process;CC:integral component of membrane;CC:extracellular region;CC:plant-type cell wall;CC:plasmodesma;MF:heme binding;MF:metal ion binding;MF:peroxidase activity;	K00430	E1.11.1.7	map00940	Phenylpropanoid biosynthesis	ENOG411072Z;ENOG410YDTD	S:Function unknown;G:Carbohydrate transport and metabolism	KAF6982508.1	hypothetical protein CFC21_000889 [Triticum aestivum]	sp|A7QEU4|PER5_VITVI;	Peroxidase 5 OS=Vitis vinifera OX=29760 GN=GSVIVT00037159001 PE=1 SV=2;	PF00141.25	peroxidase	Peroxidase
TraesCS1A02G080600	7.99333	3.89833	1.03594	Non-specific serine/threonine protein kinase [Source:UniProtKB/TrEMBL;Acc:A0A0D3R0L8]	GO:0006468;GO:0016310;GO:0106311;GO:0007165;GO:0016301;GO:0000166;GO:0004674;GO:0016740;GO:0004672;GO:0005524;GO:010631	BP:protein phosphorylation;BP:phosphorylation;BP:old GO;BP:signal transduction;MF:kinase activity;MF:nucleotide binding;MF:protein serine/threonine kinase activity;MF:transferase activity;MF:protein kinase activity;MF:ATP binding;MF:old GO;	K07198	PRKAA, AMPK	------	------	COG0515	T:Signal transduction mechanisms	AJR22378.1	CBL-interacting protein kinase 17 [Triticum aestivum]	sp|Q75L42|CIPKH_ORYSJ;	CBL-interacting protein kinase 17 OS=Oryza sativa subsp. japonica OX=39947 GN=CIPK17 PE=2 SV=1;	PF00069.27;PF07714.19;PF03822.16;PF14531.8;PF03109.18;PF02149.21	Pkinase;PK_Tyr_Ser-Thr;NAF;Kinase-like;ABC1;KA1	Protein kinase domain;Protein tyrosine and serine/threonine kinase;NAF domain;Kinase-like;ABC1 atypical kinase-like domain;Kinase associated domain 1
TraesCS1A02G083300	15.2267	3.16583	2.26594	-	------	------	------	------	------	------	ENOG41105C2	S:Function unknown	XP_037485622.1	uncharacterized protein LOC119364279 [Triticum dicoccoides]	------	------	------	------	------
TraesCS1A02G083800	0.7075	0.104167	2.76383	-	GO:001649	MF:oxidoreductase activity;	------	------	------	------	COG1028	S:Function unknown	KAF6982546.1	hypothetical protein CFC21_000926 [Triticum aestivum]	sp|Q75KH3|GRDH_ORYSJ;	Glucose and ribitol dehydrogenase homolog OS=Oryza sativa subsp. japonica OX=39947 GN=Os05g0140800 PE=2 SV=2;	PF13561.8;PF00106.27;PF08659.12	adh_short_C2;adh_short;KR	Enoyl;short chain dehydrogenase;KR domain
TraesCS1A02G084600	6.80333	0	#DIV/0!	-	------	------	------	------	------	------	ENOG41113UW	S:Function unknown	KAF6982551.1	hypothetical protein CFC21_000931 [Triticum aestivum]	------	------	------	------	------
TraesCS1A02G084900	34.5708	9.79333	1.81968	-	------	------	------	------	------	------	ENOG41106GD;ENOG41105DU	S:Function unknown;	XP_037453814.1	uncharacterized protein LOC119324144 [Triticum dicoccoides]	------	------	------	------	------
TraesCS1A02G088600	8.65083	3.20833	1.43102	-	GO:0005986;GO:0000287;GO:005030	BP:sucrose biosynthetic process;MF:magnesium ion binding;MF:sucrose-phosphate phosphatase activity;	K07024	SPP	map00500	Starch and sucrose metabolism	COG0561	S:Function unknown	XP_037486155.1	probable sucrose-phosphatase 3 [Triticum dicoccoides]	sp|A3AZW5|SPP3_ORYSJ;	Probable sucrose-phosphatase 3 OS=Oryza sativa subsp. japonica OX=39947 GN=SPP3 PE=3 SV=1;	PF05116.15;PF08472.12;PF08282.14	S6PP;S6PP_C;Hydrolase_3	Sucrose-6F-phosphate phosphohydrolase;Sucrose-6-phosphate phosphohydrolase C-terminal;haloacid dehalogenase-like hydrolase
TraesCS1A02G089800	0.598333	1.21167	-1.01797	-	GO:0016021;GO:001674	CC:integral component of membrane;MF:transferase activity;	------	------	------	------	ENOG410XT5U	S:Function unknown	KAE8766891.1	O-glucosyltransferase rumi [Hordeum vulgare]	sp|G3V9D0|PGLT1_RAT;	Protein O-glucosyltransferase 1 OS=Rattus norvegicus OX=10116 GN=Poglut1 PE=3 SV=1;	PF05686.14	Glyco_transf_90	Glycosyl transferase family 90
TraesCS1A02G092800	0.051667	0.38	-2.87868	-	------	------	------	------	------	------	ENOG41106U6	S:Function unknown	XP_037412046.1	desiccation-related protein PCC13-62-like [Triticum dicoccoides]	sp|P22242|DRPE_CRAPL;	Desiccation-related protein PCC13-62 OS=Craterostigma plantagineum OX=4153 PE=2 SV=1;	PF13668.8	Ferritin_2	Ferritin-like domain
TraesCS1A02G093000	0.918333	0.2	2.19902	TSPO [Source:Projected from Arabidopsis thaliana (AT2G47770) UniProtKB/TrEMBL;Acc:A0A178W1Q1]	GO:0009737;GO:0006778;GO:0009651;GO:0005795;GO:0005783;GO:0016021;GO:002003	BP:response to abscisic acid;BP:porphyrin-containing compound metabolic process;BP:response to salt stress;CC:Golgi stack;CC:endoplasmic reticulum;CC:integral component of membrane;MF:heme binding;	K05770	TSPO, BZRP	------	------	ENOG410YY8X	U:Intracellular trafficking, secretion, and vesicular transport	XP_037411950.1	translocator protein homolog [Triticum dicoccoides]	sp|O82245|TSPO_ARATH;	Translocator protein homolog OS=Arabidopsis thaliana OX=3702 GN=TSPO PE=1 SV=1;	PF03073.17	TspO_MBR	TspO/MBR family
TraesCS1A02G094700	8.5225	28.955	-1.76446	-	GO:0006629;GO:0016021;GO:001678	BP:lipid metabolic process;CC:integral component of membrane;MF:hydrolase activity;	------	------	------	------	ENOG41126U1	S:Function unknown	XP_037489094.1	triacylglycerol lipase OBL1-like [Triticum dicoccoides]	sp|F4JFU8|OBL1_ARATH;	Triacylglycerol lipase OBL1 OS=Arabidopsis thaliana OX=3702 GN=OBL1 PE=1 SV=1;	PF01764.27	Lipase_3	Lipase
TraesCS1A02G094900	15.8517	6.79167	1.2228	Phenylalanine ammonia-lyase [Source:UniProtKB/TrEMBL;Acc:A0A1D5S372]	GO:0006559;GO:0009800;GO:0005737;GO:0016841;GO:0003824;GO:004554	BP:L-phenylalanine catabolic process;BP:cinnamic acid biosynthetic process;CC:cytoplasm;MF:ammonia-lyase activity;MF:catalytic activity;MF:phenylalanine ammonia-lyase activity;	K10775	PAL	map00940;map00360	Phenylpropanoid biosynthesis;Phenylalanine metabolism	COG2986	E:Amino acid transport and metabolism	KAF6982684.1	hypothetical protein CFC21_001042 [Triticum aestivum]	sp|Q43210|PALY_WHEAT;	Phenylalanine ammonia-lyase OS=Triticum aestivum OX=4565 GN=PAL PE=3 SV=1;	PF00221.21	Lyase_aromatic	Aromatic amino acid lyase
TraesCS1A02G097300	4.31083	8.33833	-0.951792	-	GO:0006355;GO:0008270;GO:004356	BP:regulation of transcription, DNA-templated;MF:zinc ion binding;MF:sequence-specific DNA binding;	------	------	------	------	COG5641	K:Transcription	KAF6982720.1	hypothetical protein CFC21_001068 [Triticum aestivum]	sp|Q8LC59|GAT23_ARATH;	GATA transcription factor 23 OS=Arabidopsis thaliana OX=3702 GN=GATA23 PE=2 SV=2;	PF00320.29;PF12090.10	GATA;Spt20	GATA zinc finger;Spt20 family
TraesCS1A02G098900	3.58917	0.815833	2.1373	-	GO:0006417;GO:0005737;GO:0016021;GO:0030015;GO:000563	BP:regulation of translation;CC:cytoplasm;CC:integral component of membrane;CC:CCR4-NOT core complex;CC:nucleus;	------	------	------	------	COG5103	K:Transcription	KAF6982742.1	hypothetical protein CFC21_001090 [Triticum aestivum]	sp|A1A5H6|CNOT1_DANRE;	CCR4-NOT transcription complex subunit 1 OS=Danio rerio OX=7955 GN=cnot1 PE=2 SV=1;	PF16415.7	CNOT1_CAF1_bind	CCR4-NOT transcription complex subunit 1 CAF1-binding domain
TraesCS1A02G104100	16.0133	5.51333	1.53828	Peroxidase [Source:UniProtKB/TrEMBL;Acc:W4ZXD5]	GO:0006979;GO:0042744;GO:0005576;GO:0020037;GO:0046872;GO:000460	BP:response to oxidative stress;BP:hydrogen peroxide catabolic process;CC:extracellular region;MF:heme binding;MF:metal ion binding;MF:peroxidase activity;	K00430	E1.11.1.7	map00940	Phenylpropanoid biosynthesis	ENOG410YC4V	G:Carbohydrate transport and metabolism	KAF6982811.1	hypothetical protein CFC21_001152 [Triticum aestivum]	sp|Q42517|PERN_ARMRU;	Peroxidase N OS=Armoracia rusticana OX=3704 GN=HRPN PE=2 SV=1;	PF00141.25	peroxidase	Peroxidase
TraesCS1A02G106200	0.4525	0.1175	1.94526	GA2ox-A1 protein [Source:UniProtKB/TrEMBL;Acc:A0A140KPT2]	GO:0009685;GO:0009416;GO:0045487;GO:0016491;GO:0052634;GO:0102111;GO:0051213;GO:0102924;GO:0102652;GO:0046872;GO:004554	BP:gibberellin metabolic process;BP:response to light stimulus;BP:gibberellin catabolic process;MF:oxidoreductase activity;MF:C-19 gibberellin 2-beta-dioxygenase activity;MF:gibberellin A20,2-oxoglutarat;MF:dioxygenase activity;MF:gibberellin A44,2-oxoglutarat;MF:gibberellin A9,2-oxoglutarat;MF:metal ion binding;MF:gibberellin 2-beta-dioxygenase activity;	K04125	GA2ox	map00904	Diterpenoid biosynthesis	COG3491	S:Function unknown	KAF6982830.1	hypothetical protein CFC21_001169 [Triticum aestivum]	sp|Q5W726|G2OX1_ORYSJ;	Gibberellin 2-beta-dioxygenase 1 OS=Oryza sativa subsp. japonica OX=39947 GN=GA2OX1 PE=1 SV=1;	PF03171.22;PF14226.8	2OG-FeII_Oxy;DIOX_N	2OG-F;non-haem dioxygenase in morphine synthesis N-terminal
TraesCS1A02G106500	2.00333	0.604167	1.72938	-	GO:0006415;GO:0000054;GO:0006413;GO:0051536;GO:0005506;GO:0046872;GO:0043024;GO:000552	BP:translational termination;BP:ribosomal subunit export from nucleus;BP:translational initiation;MF:iron-sulfur cluster binding;MF:iron ion binding;MF:metal ion binding;MF:ribosomal small subunit binding;MF:ATP binding;	------	------	------	------	COG1142	C:Energy production and conversion	XP_037488175.1	uncharacterized protein LOC119366526 isoform X1 [Triticum dicoccoides]	------	------	PF12617.10;PF12838.9;PF13484.8;PF13187.8;PF12837.9;PF00037.29;PF13237.8	LdpA_C;Fer4_7;Fer4_16;Fer4_9;Fer4_6;Fer4;Fer4_10	Iron-Sulfur binding protein C terminal;4Fe-4S dicluster domain;4Fe-4S double cluster binding domain;4Fe-4S dicluster domain;4Fe-4S binding domain;4Fe-4S binding domain;4Fe-4S dicluster domain
TraesCS1A02G107700	3.08667	0.841667	1.87473	-	GO:0005634;GO:000367	CC:nucleus;MF:DNA binding;	------	------	------	------	COG5269	K:Transcription	KAF6982851.1	hypothetical protein CFC21_001183 [Triticum aestivum]	sp|Q8H0W3|RVE6_ARATH;	Protein REVEILLE 6 OS=Arabidopsis thaliana OX=3702 GN=RVE6 PE=2 SV=1;	PF00249.33;PF15963.7	Myb_DNA-binding;Myb_DNA-bind_7	Myb-like DNA-binding domain;Myb DNA-binding like
TraesCS1A02G108100	2.49667	1.15083	1.11732	-	GO:0006468;GO:0046777;GO:0016021;GO:0005886;GO:0009506;GO:0004674;GO:0004672;GO:000552	BP:protein phosphorylation;BP:protein autophosphorylation;CC:integral component of membrane;CC:plasma membrane;CC:plasmodesma;MF:protein serine/threonine kinase activity;MF:protein kinase activity;MF:ATP binding;	------	------	------	------	COG0515	T:Signal transduction mechanisms	KAF6982860.1	hypothetical protein CFC21_001187 [Triticum aestivum]	sp|Q9LX66|HERK_ARATH;	Receptor-like protein kinase HERK 1 OS=Arabidopsis thaliana OX=3702 GN=HERK1 PE=1 SV=1;	PF07714.19;PF00069.27;PF12819.9;PF11721.10;PF03109.18	PK_Tyr_Ser-Thr;Pkinase;Malectin_like;Malectin;ABC1	Protein tyrosine and serine/threonine kinase;Protein kinase domain;Malectin-like domain;Malectin domain;ABC1 atypical kinase-like domain
TraesCS1A02G110400	2.8775	0.186667	3.94628	-	GO:004698	MF:protein dimerization activity;	------	------	------	------	ENOG410ZM5C;ENOG41107EQ;ENOG41118XT	K:Transcription;S:Function unknown;S:Function unknown	KAF6982876.1	hypothetical protein CFC21_001204 [Triticum aestivum]	sp|Q9XEF0|BH051_ARATH;	Transcription factor bHLH51 OS=Arabidopsis thaliana OX=3702 GN=BHLH51 PE=2 SV=1;	PF00010.28	HLH	Helix-loop-helix DNA-binding domain
TraesCS1A02G112200	5.59083	2.33083	1.26222	-	GO:0005774;GO:000377	CC:vacuolar membrane;MF:actin binding;	------	------	------	------	ENOG410YMAJ;ENOG4111W2T	S:Function unknown;	XP_037487467.1	protein NETWORKED 4B-like [Triticum dicoccoides]	sp|F4KEW8|NET4A_ARATH;	Protein NETWORKED 4A OS=Arabidopsis thaliana OX=3702 GN=NET4A PE=2 SV=1;	PF07765.14;PF17082.7;PF19220.2	KIP1;Spc29;Crescentin	KIP1-like protein;Spindle Pole Component 29;Crescentin protein
TraesCS1A02G113800	6.555	13.0217	-0.990246	-	GO:0006468;GO:0016021;GO:0004674;GO:0005515;GO:0004672;GO:000552	BP:protein phosphorylation;CC:integral component of membrane;MF:protein serine/threonine kinase activity;MF:protein binding;MF:protein kinase activity;MF:ATP binding;	------	------	------	------	COG4886	S:Function unknown	KAF6982911.1	hypothetical protein CFC21_001236 [Triticum aestivum]	sp|F4K6B8|RGI4_ARATH;	Leucine-rich repeat receptor-like serine/threonine-protein kinase RGI4 OS=Arabidopsis thaliana OX=3702 GN=RGI4 PE=1 SV=1;	PF13855.8;PF12799.9;PF00069.27;PF07714.19;PF08263.14	LRR_8;LRR_4;Pkinase;PK_Tyr_Ser-Thr;LRRNT_2	Leucine rich repeat;Leucine Rich repeats;Protein kinase domain;Protein tyrosine and serine/threonine kinase;Leucine rich repeat N-terminal domain
TraesCS1A02G114100	1.7875	0.698333	1.35596	-	------	------	------	------	------	------	ENOG41103UH;ENOG41105HU	S:Function unknown;	KAF6982916.1	hypothetical protein CFC21_001239 [Triticum aestivum]	------	------	------	------	------
TraesCS1A02G115400	3.95083	13.2975	-1.75093	-	GO:0016021;GO:000551	CC:integral component of membrane;MF:protein binding;	------	------	------	------	ENOG41116YB	S:Function unknown	KAF6982929.1	hypothetical protein CFC21_001250 [Triticum aestivum]	sp|Q681K2|ATS3A_ARATH;	Embryo-specific protein ATS3A OS=Arabidopsis thaliana OX=3702 GN=ATS3A PE=1 SV=1;	PF06232.13	ATS3	Embryo-specific protein 3,
TraesCS1A02G117000	16.5875	35.9625	-1.1164	-	------	------	------	------	------	------	ENOG410ZUQD;ENOG410Z2Q7	S:Function unknown;	KAF6982944.1	hypothetical protein CFC21_001264 [Triticum aestivum]	------	------	------	------	------
TraesCS1A02G120100	53.9625	11.3042	2.2551	-	GO:0016887;GO:000552	MF:ATPase activity;MF:ATP binding;	K09489	HSPA4	------	------	COG0443	O:Posttranslational modification, protein turnover, chaperones	KAF6982979.1	hypothetical protein CFC21_001290 [Triticum aestivum]	sp|Q9S7C0|HSP7O_ARATH;	Heat shock 70 kDa protein 14 OS=Arabidopsis thaliana OX=3702 GN=HSP70-14 PE=1 SV=1;	PF00012.22;PF06723.15	HSP70;MreB_Mbl	Hsp70 protein;MreB/Mbl protein
TraesCS1A02G121500	8.39333	2.75583	1.60676	-	GO:0006355;GO:0050896;GO:0005634;GO:0043565;GO:0003700;GO:000367	BP:regulation of transcription, DNA-templated;BP:response to stimulus;CC:nucleus;MF:sequence-specific DNA binding;MF:transcription factor activity, sequence-specific DNA binding;MF:DNA binding;	------	------	------	------	ENOG410YQZM	K:Transcription	EMS47362.1	putative WRKY transcription factor 50 [Triticum urartu]	sp|Q8VWQ5|WRK50_ARATH;	Probable WRKY transcription factor 50 OS=Arabidopsis thaliana OX=3702 GN=WRKY50 PE=2 SV=1;	PF03106.17	WRKY	WRKY DNA -binding domain
TraesCS1A02G122000	8.6725	4.43583	0.967243	-	GO:000950	CC:chloroplast;	K08234	yaeR	------	------	ENOG410ZWRD	S:Function unknown	XP_037486610.1	uncharacterized protein YwkD-like [Triticum dicoccoides]	sp|P45871|YWKD_BACSU;	Uncharacterized protein YwkD OS=Bacillus subtilis;	PF00903.27;PF13669.8	Glyoxalase;Glyoxalase_4	Glyoxalase/Bleomycin resistance protein/Dioxygenase superfamily;Glyoxalase/Bleomycin resistance protein/Dioxygenase superfamily
TraesCS1A02G122900	2.2325	6.37583	-1.51395	-	GO:000551	MF:protein binding;	------	------	------	------	ENOG410YC0Z	S:Function unknown	VAH03212.1	unnamed protein product [Triticum turgidum subsp. durum]	sp|Q9LK76|IQD26_ARATH;	Protein IQ-domain 26 OS=Arabidopsis thaliana OX=3702 GN=IQD26 PE=1 SV=1;	PF13178.8;PF00612.29	DUF4005;IQ	Protein of unknown function;IQ calmodulin-binding motif
TraesCS1A02G125400	3.78	1.85667	1.02567	-	GO:000563	CC:nucleus;	------	------	------	------	ENOG410XYNX	S:Function unknown	VAH03290.1	unnamed protein product [Triticum turgidum subsp. durum]	sp|Q058N0|IQM5_ARATH;	IQ domain-containing protein IQM5 OS=Arabidopsis thaliana OX=3702 GN=IQM5 PE=2 SV=1;	------	------	------
TraesCS1A02G127500	0.185833	0.4225	-1.18494	-	GO:0055085;GO:001602	BP:transmembrane transport;CC:integral component of membrane;	------	------	------	------	ENOG4111I0D	P:Inorganic ion transport and metabolism	KAF6983075.1	hypothetical protein CFC21_001363 [Triticum aestivum]	sp|Q9FLV9|SLAH3_ARATH;	S-type anion channel SLAH3 OS=Arabidopsis thaliana OX=3702 GN=SLAH3 PE=1 SV=1;	PF03595.19	SLAC1	Voltage-dependent anion channel
TraesCS1A02G127700	2.76833	0.874167	1.66304	-	------	------	------	------	------	------	ENOG41104QM;ENOG41105Z1	S:Function unknown;	KAF6983078.1	hypothetical protein CFC21_001365 [Triticum aestivum]	------	------	------	------	------
TraesCS1A02G127800	7.53167	2.54083	1.56767	-	GO:0016021;GO:000827	CC:integral component of membrane;MF:zinc ion binding;	------	------	------	------	ENOG41104QM	S:Function unknown	KAF6983079.1	hypothetical protein CFC21_001366 [Triticum aestivum]	------	------	PF06839.14	zf-GRF	GRF zinc finger
TraesCS1A02G129600	0.236667	1.20917	-2.35308	Bidirectional sugar transporter SWEET [Source:UniProtKB/TrEMBL;Acc:W4ZUX2]	GO:0008643;GO:0016021;GO:0005887;GO:0005886;GO:005111	BP:carbohydrate transport;CC:integral component of membrane;CC:integral component of plasma membrane;CC:plasma membrane;MF:sugar transmembrane transporter activity;	K15382	SLC50A, SWEET	------	------	ENOG4111M4R	U:Intracellular trafficking, secretion, and vesicular transport	XP_037404167.1	bidirectional sugar transporter SWEET3a-like [Triticum dicoccoides]	sp|Q5NAZ9|SWT3B_ORYSJ;	Bidirectional sugar transporter SWEET3b OS=Oryza sativa subsp. japonica OX=39947 GN=SWEET3B PE=3 SV=2;	PF03083.18	MtN3_slv	Sugar efflux transporter for intercellular exchange
TraesCS1A02G133000	0.076667	0.448333	-2.54789	-	------	------	------	------	------	------	ENOG41105MK	S:Function unknown	KAF6983139.1	hypothetical protein CFC21_001414 [Triticum aestivum]	------	------	PF04788.14	DUF620	Protein of unknown function
TraesCS1A02G133100	28.6858	10.9117	1.39447	-	GO:0006457;GO:0009507;GO:0051082;GO:0016887;GO:000552	BP:protein folding;CC:chloroplast;MF:unfolded protein binding;MF:ATPase activity;MF:ATP binding;	K03283	HSPA1s	map04144;map04141;map03040	Endocytosis;Protein processing in endoplasmic reticulum;Spliceosome	COG0443	O:Posttranslational modification, protein turnover, chaperones	KAF6983141.1	hypothetical protein CFC21_001415 [Triticum aestivum]	sp|Q02028|HSP7S_PEA;	Stromal 70 kDa heat shock-related protein, chloroplastic OS=Pisum sativum OX=3888 GN=HSP70 PE=2 SV=1;	PF00012.22;PF06723.15	HSP70;MreB_Mbl	Hsp70 protein;MreB/Mbl protein
TraesCS1A02G135900	0.260833	0.715	-1.45482	-	GO:0006629;GO:0016298;GO:001678	BP:lipid metabolic process;MF:lipase activity;MF:hydrolase activity, acting on ester bonds;	------	------	------	------	COG3240	S:Function unknown	KAF6983191.1	hypothetical protein CFC21_001446 [Triticum aestivum]	sp|Q94CH6|EXL3_ARATH;	GDSL esterase/lipase EXL3 OS=Arabidopsis thaliana OX=3702 GN=EXL3 PE=2 SV=1;	PF00657.24	Lipase_GDSL	GDSL-like Lipase/Acylhydrolase
TraesCS1A02G139900	22.465	6.85333	1.7128	-	GO:004687	MF:metal ion binding;	------	------	------	------	COG2608	S:Function unknown	VAH03845.1	unnamed protein product [Triticum turgidum subsp. durum]	sp|Q9SJL2|HIP5_ARATH;	Heavy metal-associated isoprenylated plant protein 5 OS=Arabidopsis thaliana OX=3702 GN=HIPP05 PE=1 SV=2;	PF00403.28	HMA	Heavy-metal-associated domain
TraesCS1A02G144400	1.28	0.460833	1.47383	-	GO:0006355;GO:0003700;GO:0008270;GO:004356	BP:regulation of transcription, DNA-templated;MF:transcription factor activity, sequence-specific DNA binding;MF:zinc ion binding;MF:sequence-specific DNA binding;	K09184	GATAF	------	------	COG5641	K:Transcription	XP_037475127.1	uncharacterized protein LOC119352648 [Triticum dicoccoides]	sp|Q9FH57|GATA5_ARATH;	GATA transcription factor 5 OS=Arabidopsis thaliana OX=3702 GN=GATA5 PE=2 SV=1;	PF00320.29	GATA	GATA zinc finger
TraesCS1A02G144700	2.88	0.704167	2.03208	-	GO:000551	MF:protein binding;	------	------	------	------	ENOG410XXR9	S:Function unknown	KAF6983322.1	hypothetical protein CFC21_001532 [Triticum aestivum]	------	------	PF12937.9	F-box-like	F-box-like
TraesCS1A02G149600	7.41417	2.83167	1.38863	-	GO:0009694;GO:0009696;GO:0080032;GO:0080031;GO:008003	BP:jasmonic acid metabolic process;BP:salicylic acid metabolic process;MF:methyl jasmonate esterase activity;MF:methyl salicylate esterase activity;MF:methyl indole-3-acetate esterase activity;	------	------	------	------	ENOG4111IVV	S:Function unknown	XP_037406092.1	probable esterase PIR7A [Triticum dicoccoides]	sp|A2WYS8|PIR7A_ORYSI;	Probable esterase PIR7A OS=Oryza sativa subsp. indica OX=39946 GN=PIR7A PE=3 SV=2;	PF12697.9;PF00561.22;PF12146.10;PF06821.15	Abhydrolase_6;Abhydrolase_1;Hydrolase_4;Ser_hydrolase	Alpha/beta hydrolase family;alpha/beta hydrolase fold;Serine aminopeptidase, S33;Serine hydrolase
TraesCS1A02G149700	8.96	4.08667	1.13257	-	GO:0009755;GO:0006468;GO:0046777;GO:0016021;GO:0005886;GO:0004674;GO:0005515;GO:0004672;GO:000552	BP:hormone-mediated signaling pathway;BP:protein phosphorylation;BP:protein autophosphorylation;CC:integral component of membrane;CC:plasma membrane;MF:protein serine/threonine kinase activity;MF:protein binding;MF:protein kinase activity;MF:ATP binding;	------	------	------	------	COG4886	S:Function unknown	XP_037406101.1	probable leucine-rich repeat receptor-like protein kinase At1g35710 [Triticum dicoccoides]	sp|Q9LP24|Y1571_ARATH;	Probable leucine-rich repeat receptor-like protein kinase At1g35710 OS=Arabidopsis thaliana OX=3702 GN=At1g35710 PE=1 SV=1;	PF13855.8;PF12799.9;PF00069.27;PF07714.19;PF08263.14	LRR_8;LRR_4;Pkinase;PK_Tyr_Ser-Thr;LRRNT_2	Leucine rich repeat;Leucine Rich repeats;Protein kinase domain;Protein tyrosine and serine/threonine kinase;Leucine rich repeat N-terminal domain
TraesCS1A02G161900	46.1492	19.2492	1.26151	-	GO:0006334;GO:0000398;GO:0008380;GO:0006397;GO:0046540;GO:0016021;GO:0005634;GO:0005682;GO:000568	BP:nucleosome assembly;BP:mRNA splicing, via spliceosome;BP:RNA splicing;BP:mRNA processing;CC:U4/U6 x U5 tri-snRNP complex;CC:integral component of membrane;CC:nucleus;CC:U5 snRNP;CC:spliceosomal complex;	K12859	TXNL4A, DIB1	map03040	Spliceosome	ENOG4111FE6	S:Function unknown	VAH16547.1	unnamed protein product [Triticum turgidum subsp. durum]	sp|Q9FE62|YLS8_ARATH;	Thioredoxin-like protein YLS8 OS=Arabidopsis thaliana OX=3702 GN=YLS8 PE=1 SV=1;	PF02966.18;PF00085.22	DIM1;Thioredoxin	Mitosis protein DIM1;Thioredoxin
TraesCS1A02G165400	1.21167	0.223333	2.43972	-	GO:0055085;GO:0016021;GO:0016020;GO:0005774;GO:0032586;GO:0015250;GO:001526	BP:transmembrane transport;CC:integral component of membrane;CC:membrane;CC:vacuolar membrane;CC:protein storage vacuole membrane;MF:water channel activity;MF:channel activity;	K09873	TIP	------	------	COG0580	G:Carbohydrate transport and metabolism	XP_037408098.1	aquaporin TIP3-1 [Triticum dicoccoides]	sp|Q9FWV6|TIP31_ORYSJ;	Probable aquaporin TIP3-1 OS=Oryza sativa subsp. japonica OX=39947 GN=TIP3-1 PE=2 SV=1;	PF00230.22	MIP	Major intrinsic protein
TraesCS1A02G168100	2.87167	7.60917	-1.40585	Carboxypeptidase [Source:UniProtKB/TrEMBL;Acc:A0A1D5RVQ7]	GO:0006508;GO:000418	BP:proteolysis;MF:serine-type carboxypeptidase activity;	K09646	SCPEP1	------	------	COG2939	E:Amino acid transport and metabolism	KAF6983602.1	hypothetical protein CFC21_001763 [Triticum aestivum]	sp|Q67Y83|SCP51_ARATH;	Serine carboxypeptidase-like 51 OS=Arabidopsis thaliana OX=3702 GN=SCPL51 PE=2 SV=2;	PF00450.24	Peptidase_S10	Serine carboxypeptidase
TraesCS1A02G177800	0.994167	2.56333	-1.36646	-	GO:0016021;GO:0004497;GO:0016705;GO:0005506;GO:002003	CC:integral component of membrane;MF:monooxygenase activity;MF:oxidoreductase activity, acting on paired donors, with incorporation or reduction of molecular oxygen;MF:iron ion binding;MF:heme binding;	K09755	CYP84A, F5H	map00940	Phenylpropanoid biosynthesis	COG2124	Q:Secondary metabolites biosynthesis, transport and catabolism	XP_037409195.1	cytochrome P450 84A1-like [Triticum dicoccoides]	sp|Q42600|C84A1_ARATH;	Cytochrome P450 84A1 OS=Arabidopsis thaliana OX=3702 GN=CYP84A1 PE=1 SV=1;	PF00067.24	p450	Cytochrome P450
TraesCS1A02G180700	1.255	2.72917	-1.12077	-	------	------	------	------	------	------	ENOG41104TQ	S:Function unknown	KAF6983770.1	hypothetical protein CFC21_001889 [Triticum aestivum]	------	------	------	------	------
TraesCS1A02G183000	2.90333	1.30833	1.14998	Trehalase [Source:UniProtKB/TrEMBL;Acc:A0A1D5RZT1]	GO:0005993;GO:0005975;GO:0005991;GO:0005886;GO:000455	BP:trehalose catabolic process;BP:carbohydrate metabolic process;BP:trehalose metabolic process;CC:plasma membrane;MF:alpha,alpha-trehalase activity;	K01194	TREH, treA, treF	map00500	Starch and sucrose metabolism	COG1626	G:Carbohydrate transport and metabolism	XP_037409491.1	probable trehalase [Triticum dicoccoides]	sp|Q9FWC1|TRE_ORYSJ;	Probable trehalase OS=Oryza sativa subsp. japonica OX=39947 GN=Os10g0521000 PE=2 SV=1;	PF01204.20	Trehalase	Trehalase
TraesCS1A02G183100	2.0075	4.08167	-1.02376	-	GO:0030042;GO:0005737;GO:0015629;GO:0003779;GO:005101	BP:actin filament depolymerization;CC:cytoplasm;CC:actin cytoskeleton;MF:actin binding;MF:actin filament binding;	K05765	CFL	------	------	ENOG41122P5	S:Function unknown	XP_020147190.2	actin-depolymerizing factor 10 [Aegilops tauschii subsp. strangulata]	sp|Q337A5|ADF10_ORYSJ;	Actin-depolymerizing factor 10 OS=Oryza sativa subsp. japonica OX=39947 GN=ADF10 PE=2 SV=1;	PF00241.22	Cofilin_ADF	Cofilin/tropomyosin-type actin-binding protein
TraesCS1A02G183600	0.786667	0.080833	3.28274	-	------	------	------	------	------	------	------	------	EMS53619.1	hypothetical protein TRIUR3_15654 [Triticum urartu]	------	------	------	------	------
TraesCS1A02G185700	3.0525	0.654167	2.22226	-	GO:0030001;GO:004687	BP:metal ion transport;MF:metal ion binding;	------	------	------	------	COG2608	S:Function unknown	XP_037409690.1	heavy metal-associated isoprenylated plant protein 39-like [Triticum dicoccoides]	sp|O03982|HIP39_ARATH;	Heavy metal-associated isoprenylated plant protein 39 OS=Arabidopsis thaliana OX=3702 GN=HIPP39 PE=2 SV=1;	PF00403.28	HMA	Heavy-metal-associated domain
TraesCS1A02G187800	6.98333	1.8975	1.87982	-	------	------	------	------	------	------	ENOG411074S;ENOG410YWPQ	S:Function unknown;	KAF6983856.1	hypothetical protein CFC21_001953 [Triticum aestivum]	------	------	------	------	------
TraesCS1A02G189300	10.7333	4.09917	1.3887	-	------	------	------	------	------	------	ENOG4111QDI	S:Function unknown	KAF6983873.1	hypothetical protein CFC21_001968 [Triticum aestivum]	------	------	PF00561.22;PF12697.9;PF12146.10	Abhydrolase_1;Abhydrolase_6;Hydrolase_4	alpha/beta hydrolase fold;Alpha/beta hydrolase family;Serine aminopeptidase, S33
TraesCS1A02G196100	0.993333	1.35417	-0.447056	Glycosyltransferase family 2 (GT2) protein, Root hair morphogenesi [Source: Projected from Oryza sativa (Os10g0578200)]	GO:0009833;GO:0030244;GO:0071555;GO:0016021;GO:0016020;GO:0005886;GO:0005802;GO:0051753;GO:001676	BP:plant-type primary cell wall biogenesis;BP:cellulose biosynthetic process;BP:cell wall organization;CC:integral component of membrane;CC:membrane;CC:plasma membrane;CC:trans-Golgi network;MF:mannan synthase activity;MF:cellulose synthas;	K20924	CSLD	------	------	COG1215	M:Cell wall/membrane/envelope biogenesis	KAF6983951.1	hypothetical protein CFC21_002030 [Triticum aestivum]	sp|A2ZAK8|CSLD1_ORYSI;	Cellulose synthase-like protein D1 OS=Oryza sativa subsp. indica OX=39946 GN=CSLD1 PE=3 SV=2;	PF03552.16;PF14570.8;PF13632.8	Cellulose_synt;zf-RING_4;Glyco_trans_2_3	Cellulose synthase;RING/Ubox like zinc-binding domain;Glycosyl transferase family group 2
TraesCS1A02G199300	0.125	1.66333	-3.73408	Expansin [Source:UniProtKB/TrEMBL;Acc:A0A1D5RST0]	GO:0009664;GO:0005618;GO:0016020;GO:000557	BP:plant-type cell wall organization;CC:cell wall;CC:membrane;CC:extracellular region;	------	------	------	------	ENOG410Y9MB	G:Carbohydrate transport and metabolism	KAF6983991.1	hypothetical protein CFC21_002060 [Triticum aestivum]	sp|Q8W2X8|EXP30_ORYSJ;	Putative expansin-A30 OS=Oryza sativa subsp. japonica OX=39947 GN=EXPA30 PE=3 SV=1;	PF01357.23;PF03330.20	Expansin_C;DPBB_1	Expansin C-terminal domain;Lytic transglycolase
TraesCS1A02G199400	0.0525	0.644167	-3.61705	Expansin [Source:UniProtKB/TrEMBL;Acc:W4ZQL0]	GO:0009664;GO:0005618;GO:0016020;GO:000557	BP:plant-type cell wall organization;CC:cell wall;CC:membrane;CC:extracellular region;	------	------	------	------	ENOG410Y9MB	G:Carbohydrate transport and metabolism	KAF6983992.1	hypothetical protein CFC21_002061 [Triticum aestivum]	sp|Q8W2X8|EXP30_ORYSJ;	Putative expansin-A30 OS=Oryza sativa subsp. japonica OX=39947 GN=EXPA30 PE=3 SV=1;	PF03330.20;PF01357.23	DPBB_1;Expansin_C	Lytic transglycolase;Expansin C-terminal domain
TraesCS1A02G199700	0.565	0.071667	2.97887	-	------	------	------	------	------	------	------	------	KAF6989303.1	hypothetical protein CFC21_006642 [Triticum aestivum]	------	------	------	------	------
TraesCS1A02G206500	1.38	8.5225	-2.62661	-	GO:007194	CC:cell periphery;	------	------	------	------	ENOG410YZ4T	S:Function unknown	XP_037426977.1	uncharacterized protein LOC119292217 [Triticum dicoccoides]	sp|Q03211|PEXLP_TOBAC;	Pistil-specific extensin-like protein OS=Nicotiana tabacum OX=4097 PE=2 SV=1;	PF01190.19	Pollen_Ole_e_1	Pollen protein Ole e 1 like
TraesCS1A02G207600	0.551667	0.064167	3.10389	-	GO:0016021;GO:001602	CC:integral component of membrane;CC:membrane;	------	------	------	------	ENOG410YIUI	S:Function unknown	XP_037411450.1	uncharacterized protein LOC119274823 [Triticum dicoccoides]	------	------	------	------	------
TraesCS1A02G211300	1.46167	3.28	-1.16608	-	GO:0051225;GO:0005737;GO:0005880;GO:000801	BP:spindle assembly;CC:cytoplasm;CC:nuclear microtubule;MF:microtubule binding;	------	------	------	------	ENOG410YP4H	S:Function unknown	XP_037411858.1	QWRF motif-containing protein 7-like [Triticum dicoccoides]	sp|Q1PE51|QWRF7_ARATH;	QWRF motif-containing protein 7 OS=Arabidopsis thaliana OX=3702 GN=QWRF7 PE=2 SV=1;	PF04484.14	QWRF	QWRF family
TraesCS1A02G211500	15.1967	5.19417	1.54879	-	GO:0016021;GO:001675	CC:integral component of membrane;MF:transferase activity, transferring glycosyl groups;	------	------	------	------	COG5597	O:Posttranslational modification, protein turnover, chaperones	XP_037411869.1	putative glucuronosyltransferase PGSIP8 [Triticum dicoccoides]	sp|Q8VZP6|GUX8_ARATH;	Putative glucuronosyltransferase PGSIP8 OS=Arabidopsis thaliana OX=3702 GN=PGSIP8 PE=2 SV=1;	------	------	------
TraesCS1A02G212000	24.7642	61.67	-1.31631	-	GO:0019953;GO:000557	BP:sexual reproduction;CC:extracellular region;	------	------	------	------	ENOG410YEZU	G:Carbohydrate transport and metabolism	KAF6984153.1	hypothetical protein CFC21_002198 [Triticum aestivum]	sp|Q7XCA7|EXPB6_ORYSJ;	Expansin-B6 OS=Oryza sativa subsp. japonica OX=39947 GN=EXPB6 PE=2 SV=1;	PF01357.23;PF03330.20	Expansin_C;DPBB_1	Expansin C-terminal domain;Lytic transglycolase
TraesCS1A02G212200	5.505	26.6758	-2.27672	Beta-expansin TaEXPB5 [Source:UniProtKB/TrEMBL;Acc:Q56TP7]	GO:0019953;GO:000557	BP:sexual reproduction;CC:extracellular region;	------	------	------	------	ENOG410YEZU;ENOG41105Y3	G:Carbohydrate transport and metabolism;	KAF6995352.1	hypothetical protein CFC21_011869 [Triticum aestivum]	sp|Q7XCA7|EXPB6_ORYSJ;	Expansin-B6 OS=Oryza sativa subsp. japonica OX=39947 GN=EXPB6 PE=2 SV=1;	PF01357.23;PF03330.20	Expansin_C;DPBB_1	Expansin C-terminal domain;Lytic transglycolase
TraesCS1A02G213800	1.11417	0.3325	1.74454	-	GO:0006457;GO:0005737;GO:0005832;GO:0005886;GO:0009506;GO:0051082;GO:0016887;GO:000552	BP:protein folding;CC:cytoplasm;CC:chaperonin-containing T-complex;CC:plasma membrane;CC:plasmodesma;MF:unfolded protein binding;MF:ATPase activity;MF:ATP binding;	K09497	CCT5	------	------	COG0459	O:Posttranslational modification, protein turnover, chaperones	XP_037412057.1	T-complex protein 1 subunit epsilon-like [Triticum dicoccoides]	sp|P40412|TCPE1_AVESA;	T-complex protein 1 subunit epsilon OS=Avena sativa OX=4498 PE=2 SV=1;	PF00118.26	Cpn60_TCP1	TCP-1/cpn60 chaperonin family
TraesCS1A02G213900	11.6533	3.15083	1.88694	-	GO:0000266;GO:0050832;GO:0046686;GO:0005737;GO:0016020;GO:0005739;GO:0005774;GO:0005886;GO:0009506;GO:0008017;GO:0003924;GO:000552	BP:mitochondrial fission;BP:defense response to fungus;BP:response to cadmium ion;CC:cytoplasm;CC:membrane;CC:mitochondrion;CC:vacuolar membrane;CC:plasma membrane;CC:plasmodesma;MF:microtubule binding;MF:GTPase activity;MF:GTP binding;	------	------	------	------	COG0699	S:Function unknown	XP_037412060.1	dynamin-related protein 1E-like [Triticum dicoccoides]	sp|Q9FNX5|DRP1E_ARATH;	Phragmoplastin DRP1E OS=Arabidopsis thaliana OX=3702 GN=DRP1E PE=1 SV=1;	PF01031.22;PF00350.25;PF02212.20;PF01926.25	Dynamin_M;Dynamin_N;GED;MMR_HSR1	Dynamin central region;Dynamin family;Dynamin GTPase effector domain;50S ribosome-binding GTPase
TraesCS1A02G215500	13.7258	33.9075	-1.30471	Beta-amylase [Source:UniProtKB/TrEMBL;Acc:A0A1D5RW46]	GO:0005983;GO:0000272;GO:0009409;GO:0000024;GO:0009570;GO:0016161;GO:010222	BP:starch catabolic process;BP:polysaccharide catabolic process;BP:response to cold;BP:maltose biosynthetic process;CC:chloroplast stroma;MF:beta-amylase activity;MF:amylopectin maltohydrolase activity;	K01177	E3.2.1.2	map00500	Starch and sucrose metabolism	ENOG410XRH5	S:Function unknown	KAF6984200.1	hypothetical protein CFC21_002240 [Triticum aestivum]	sp|O23553|BAM3_ARATH;	Beta-amylase 3, chloroplastic OS=Arabidopsis thaliana OX=3702 GN=BAM3 PE=1 SV=3;	PF01373.19	Glyco_hydro_14	Glycosyl hydrolase family 14
TraesCS1A02G217000	2.9525	7.84167	-1.40922	-	GO:0000079;GO:0019901;GO:000372	BP:regulation of cyclin-dependent protein serine/threonine kinase activity;MF:protein kinase binding;MF:RNA binding;	------	------	------	------	ENOG4111TTK	S:Function unknown	XP_037412450.1	cyclin-P4-1-like [Triticum dicoccoides]	sp|Q7XC35|CCP41_ORYSJ;	Cyclin-P4-1 OS=Oryza sativa subsp. japonica OX=39947 GN=CYCP4-1 PE=2 SV=1;	PF08613.13;PF00134.25	Cyclin;Cyclin_N	Cyclin;Cyclin, N-terminal domain
TraesCS1A02G217100	7.01333	1.9525	1.84478	PRA1 family protein [Source:UniProtKB/TrEMBL;Acc:A0A1D5RUP1]	GO:001602	CC:integral component of membrane;	------	------	------	------	ENOG410ZHHJ	S:Function unknown	XP_037428495.1	uncharacterized protein LOC119294400 [Triticum dicoccoides]	------	------	PF03208.21	PRA1	PRA1 family protein
TraesCS1A02G221700	5.7575	2.88833	0.995205	-	GO:001602	CC:integral component of membrane;	------	------	------	------	ENOG41114FM;ENOG410ZPMX;ENOG411169M	S:Function unknown;	XP_037412856.1	uncharacterized protein LOC119276008 [Triticum dicoccoides]	------	------	PF10457.11	MENTAL	Cholesterol-capturing domain
TraesCS1A02G221900	41.3692	18.5133	1.15999	-	GO:0006355;GO:0005634;GO:0003700;GO:000367	BP:regulation of transcription, DNA-templated;CC:nucleus;MF:transcription factor activity, sequence-specific DNA binding;MF:DNA binding;	------	------	------	------	ENOG410YKCQ	K:Transcription	KAF6984266.1	hypothetical protein CFC21_002305 [Triticum aestivum]	sp|Q5W6R4|DRE2B_ORYSJ;	Dehydration-responsive element-binding protein 2B OS=Oryza sativa subsp. japonica OX=39947 GN=DREB2B PE=2 SV=2;	PF00847.22	AP2	AP2 domain
TraesCS1A02G229900	12.7667	5.30833	1.26605	-	GO:0003723;GO:000367	MF:RNA binding;MF:nucleic acid binding;	K12890	SRSF1, SFRS1, ASF, SF2	map03040	Spliceosome	COG0724	S:Function unknown	EMS51567.1	Pre-mRNA-splicing factor SF2 [Triticum urartu]	sp|Q9XFR5|SR30_ARATH;	Serine/arginine-rich splicing factor SR30 OS=Arabidopsis thaliana OX=3702 GN=SR30 PE=1 SV=1;	PF00076.24;PF16842.7	RRM_1;RRM_occluded	RNA recognition motif.;Occluded RNA-recognition motif
TraesCS1A02G231900	2.4	0.980833	1.29095	-	GO:0006011;GO:0005977;GO:0005737;GO:0003983;GO:007056	BP:UDP-glucose metabolic process;BP:glycogen metabolic process;CC:cytoplasm;MF:UT;MF:uridylyltransferase activity;	K00963	UGP2, galU, galF	map00520;map00040;map00500;map00052;map01240	Amino sugar and nucleotide sugar metabolism;Pentose and glucuronate interconversions;Starch and sucrose metabolism;Galactose metabolism;Biosynthesis of cofactors	COG4284	G:Carbohydrate transport and metabolism	KAF6984375.1	hypothetical protein CFC21_002400 [Triticum aestivum]	sp|Q9SDX3|UGPA_MUSAC;	UTP--glucose-1-phosphate uridylyltransferase OS=Musa acuminata OX=4641 GN=UGPA PE=2 SV=1;	PF01704.20	UDPGP	UTP--glucose-1-phosphate uridylyltransferase
TraesCS1A02G239400	0.273333	0.055	2.31316	-	GO:0016021;GO:0004497;GO:0016705;GO:0005506;GO:002003	CC:integral component of membrane;MF:monooxygenase activity;MF:oxidoreductase activity, acting on paired donors, with incorporation or reduction of molecular oxygen;MF:iron ion binding;MF:heme binding;	------	------	------	------	COG2124	Q:Secondary metabolites biosynthesis, transport and catabolism	XP_020148182.1	cytochrome P450 94A2 [Aegilops tauschii subsp. strangulata]	sp|O81117|C94A1_VICSA;	Cytochrome P450 94A1 OS=Vicia sativa OX=3908 GN=CYP94A1 PE=2 SV=2;	PF00067.24	p450	Cytochrome P450
TraesCS1A02G239600	12.7708	38.5692	-1.5946	-	GO:0005737;GO:0005544;GO:000550	CC:cytoplasm;MF:calcium-dependent phospholipid binding;MF:calcium ion binding;	K17098	ANNAT	------	------	ENOG410XPUN	S:Function unknown	VAH06903.1	unnamed protein product [Triticum turgidum subsp. durum]	sp|Q9ZVJ6|ANXD4_ARATH;	Annexin D4 OS=Arabidopsis thaliana OX=3702 GN=ANN4 PE=1 SV=1;	PF00191.22	Annexin	Annexin
TraesCS1A02G239700	5.95417	17.3442	-1.54248	Annexin [Source:UniProtKB/TrEMBL;Acc:A0A1D5RRV6]	GO:0005544;GO:000550	MF:calcium-dependent phospholipid binding;MF:calcium ion binding;	K17098	ANNAT	------	------	ENOG410XPUN	S:Function unknown	XP_037414825.1	annexin D3-like [Triticum dicoccoides]	sp|Q9SE45|ANXD3_ARATH;	Annexin D3 OS=Arabidopsis thaliana OX=3702 GN=ANN3 PE=2 SV=2;	PF00191.22	Annexin	Annexin
TraesCS1A02G241500	5.91583	2.57917	1.19768	-	GO:000368	MF:chromatin binding;	------	------	------	------	ENOG410ZNBY	S:Function unknown	KAF6984512.1	hypothetical protein CFC21_002507 [Triticum aestivum]	------	------	PF16719.7	SAWADEE	SAWADEE domain
TraesCS1A02G241600	0.999167	0.335833	1.57298	-	GO:0034968;GO:0016571;GO:0005634;GO:0005694;GO:0018024;GO:0008270;GO:000551	BP:histone lysine methylation;BP:histone methylation;CC:nucleus;CC:chromosome;MF:histone-lysine N-methyltransferase activity;MF:zinc ion binding;MF:protein binding;	K11420	EHMT	map00310	Lysine degradation	COG2940	S:Function unknown	VAH06955.1	unnamed protein product [Triticum turgidum subsp. durum]	sp|Q8GZB6|SUVH4_ARATH;	Histone-lysine N-methyltransferase, H3 lysine-9 specific SUVH4 OS=Arabidopsis thaliana OX=3702 GN=SUVH4 PE=1 SV=2;	PF02182.19;PF00856.30;PF05033.18	SAD_SRA;SET;Pre-SET	SAD/SRA domain;SET domain;Pre-SET motif
TraesCS1A02G243900	1.16333	2.37583	-1.03017	-	------	------	------	------	------	------	ENOG411074K	S:Function unknown	KAF6984538.1	hypothetical protein CFC21_002531 [Triticum aestivum]	------	------	PF11250.10	FAF	Fantastic Four meristem regulator
TraesCS1A02G247800	3.0025	6.21083	-1.04862	-	GO:000577	CC:vacuole;	------	------	------	------	ENOG410XR8Z	S:Function unknown	KAF6984591.1	hypothetical protein CFC21_002574 [Triticum aestivum]	sp|P81898|PNAA_PRUDU;	Peptide-N4;	PF12222.10	PNGaseA	Peptide N-acetyl-beta-D-glucosaminyl asparaginase amidase A
TraesCS1A02G248200	6.38	2.65417	1.2653	-	GO:0016021;GO:0004252;GO:004687	CC:integral component of membrane;MF:serine-type endopeptidase activity;MF:metal ion binding;	K09651	RHBDD1	------	------	ENOG41100KJ	S:Function unknown	XP_037415572.1	rhomboid-like protein 14, mitochondrial [Triticum dicoccoides]	sp|Q8RXW0|RBL14_ARATH;	Rhomboid-like protein 14, mitochondrial OS=Arabidopsis thaliana OX=3702 GN=RBL14 PE=2 SV=1;	PF01694.24;PF00641.20	Rhomboid;zf-RanBP	Rhomboid family;Zn-finger in Ran binding protein and others
TraesCS1A02G248300	2.3725	5.59583	-1.23794	-	------	------	------	------	------	------	ENOG410ZH4A	S:Function unknown	KAF7078638.1	hypothetical protein CFC21_083039 [Triticum aestivum]	------	------	------	------	------
TraesCS1A02G255400	65.5333	31.1008	1.07528	-	GO:001602	CC:integral component of membrane;	------	------	------	------	COG1075	S:Function unknown	XP_037416253.1	lipase-like [Triticum dicoccoides]	sp|P04635|LIP_STAHY;	Lipase OS=Staphylococcus hyicus OX=1284 GN=lip PE=1 SV=1;	------	------	------
TraesCS1A02G255800	1.03417	2.175	-1.07255	Similar to 1-deoxy-D-xylulose-5-phosphate synthase [Source: Projected from Oryza sativa (Os05g0408900)]	GO:0052865;GO:0009228;GO:0015995;GO:0016114;GO:0009570;GO:0009507;GO:0046872;GO:0008661;GO:0003824;GO:001674	BP:1-deoxy-D-xylulose 5-phosphate biosynthetic process;BP:thiamine biosynthetic process;BP:chlorophyll biosynthetic process;BP:terpenoid biosynthetic process;CC:chloroplast stroma;CC:chloroplast;MF:metal ion binding;MF:1-deoxy-D-xylulose-5-phosphate synthase activity;MF:catalytic activity;MF:transferase activity, transferring aldehyde or ketonic groups;	K01662	dxs	map00730;map00900	Thiamine metabolism;Terpenoid backbone biosynthesis	COG1154	H:Coenzyme transport and metabolism	XP_037416263.1	1-deoxy-D-xylulose-5-phosphate synthase 1, chloroplastic [Triticum dicoccoides]	sp|O22567|DXS1_ORYSJ;	1-deoxy-D-xylulose-5-phosphate synthase 1, chloroplastic OS=Oryza sativa subsp. japonica OX=39947 GN=CLA1 PE=2 SV=2;	PF13292.8;PF02779.26;PF02780.22;PF02775.23;PF00676.22;PF00456.23	DXP_synthase_N;Transket_pyr;Transketolase_C;TPP_enzyme_C;E1_dh;Transketolase_N	1-deoxy-D-xylulose-5-phosphate synthase;Transketolase, pyrimidine binding domain;Transketolase, C-terminal domain;Thiamine pyrophosphate enzyme, C-terminal TPP binding domain;Dehydrogenase E1 component;Transketolase, thiamine diphosphate binding domain
TraesCS1A02G256000	1.645	3.475	-1.07893	-	GO:003024	MF:polysaccharide binding;	------	------	------	------	ENOG410Y9ZY	S:Function unknown	KAF6995865.1	hypothetical protein CFC21_012293 [Triticum aestivum]	------	------	PF13947.8;PF14380.8	GUB_WAK_bind;WAK_assoc	Wall-associated receptor kinase galacturonan-binding;Wall-associated receptor kinase C-terminal
TraesCS1A02G257200	9.13417	1.15833	2.97922	-	GO:0051301;GO:0016021;GO:0016887;GO:000552	BP:cell division;CC:integral component of membrane;MF:ATPase activity;MF:ATP binding;	------	------	------	------	COG0464;COG0465	O:Posttranslational modification, protein turnover, chaperones;	KAF6984700.1	hypothetical protein CFC21_002664 [Triticum aestivum]	sp|Q9FLD5|ASD_ARATH;	AAA-ATPase ASD, mitochondrial OS=Arabidopsis thaliana OX=3702 GN=AATP1 PE=1 SV=1;	PF14363.8;PF00004.31;PF20030.1	AAA_assoc;AAA;bpMoxR	Domain associated at C-terminal with AAA;ATPase family associated with various cellular activities;MoxR domain in the MoxR-vWA-beta-propeller ternary systems
TraesCS1A02G257400	0.190833	0.4325	-1.18039	-	GO:0055085;GO:0016020;GO:0016021;GO:002285	BP:transmembrane transport;CC:membrane;CC:integral component of membrane;MF:transmembrane transporter activity;	------	------	------	------	COG3104	E:Amino acid transport and metabolism	KAF6984702.1	hypothetical protein CFC21_002666 [Triticum aestivum]	sp|Q9SX20|PTR18_ARATH;	Protein NRT1/ PTR FAMILY 3.1 OS=Arabidopsis thaliana OX=3702 GN=NPF3.1 PE=2 SV=1;	PF00854.23;PF07690.18	PTR2;MFS_1	POT family;Major Facilitator Superfamily
TraesCS1A02G265300	0.514167	0.030833	4.05969	-	GO:0005576;GO:000486	CC:extracellular region;MF:serine-type endopeptidase inhibitor activity;	------	------	------	------	ENOG411070C	S:Function unknown	XP_037435598.1	uncharacterized protein LOC119302626 [Triticum dicoccoides]	------	------	------	------	------
TraesCS1A02G266000	4.2725	12.5242	-1.55156	-	GO:0006629;GO:0016042;GO:000897	BP:lipid metabolic process;BP:lipid catabolic process;MF:phosphatidylcholine 1-acylhydrolase activity;	------	------	------	------	COG3675;ENOG410XUZA	S:Function unknown;	KAF6984812.1	hypothetical protein CFC21_002763 [Triticum aestivum]	sp|A2Y7R2|PLA7_ORYSI;	Phospholipase A1-II 7 OS=Oryza sativa subsp. indica OX=39946 GN=OsI_21081 PE=3 SV=1;	PF01764.27;PF05057.16	Lipase_3;DUF676	Lipase;Putative serine esterase
TraesCS1A02G268400	10.5058	21.7617	-1.0506	-	GO:0010438;GO:0005737;GO:0016491;GO:007040	BP:cellular response to sulfur starvation;CC:cytoplasm;MF:oxidoreductase activity;MF:NADPH binding;	K23050	PCBER1	------	------	ENOG410Y0DY	S:Function unknown	XP_037417208.1	isoflavone reductase homolog IRL-like [Triticum dicoccoides]	sp|P52580|IFRH_MAIZE;	Isoflavone reductase homolog IRL OS=Zea mays OX=4577 GN=IRL PE=2 SV=1;	PF05368.15;PF13460.8;PF01370.23	NmrA;NAD_binding_10;Epimerase	NmrA-like family;NA;NAD dependent epimerase/dehydratase family
TraesCS1A02G269600	1.47083	3.93083	-1.4182	-	GO:0006857;GO:0055085;GO:0016021;GO:0016020;GO:002285	BP:oligopeptide transport;BP:transmembrane transport;CC:integral component of membrane;CC:membrane;MF:transmembrane transporter activity;	K14638	SLC15A3_4, PHT	------	------	COG3104	E:Amino acid transport and metabolism	KAF6984851.1	hypothetical protein CFC21_002798 [Triticum aestivum]	sp|Q0WP01|PTR9_ARATH;	Protein NRT1/ PTR FAMILY 5.10 OS=Arabidopsis thaliana OX=3702 GN=NPF5.10 PE=2 SV=1;	PF00854.23;PF07690.18	PTR2;MFS_1	POT family;Major Facilitator Superfamily
TraesCS1A02G271800	2.2725	0.0975	4.54273	-	------	------	------	------	------	------	ENOG4112BZ0	S:Function unknown	XP_037417433.1	uncharacterized protein LOC119280819 [Triticum dicoccoides]	------	------	PF17032.7;PF12773.9	zinc_ribbon_15;DZR	zinc-ribbon family;Double zinc ribbon
TraesCS1A02G273600	1.10417	0.320833	1.78306	-	GO:0006468;GO:0016021;GO:0005524;GO:000467	BP:protein phosphorylation;CC:integral component of membrane;MF:ATP binding;MF:protein kinase activity;	------	------	------	------	COG0515	T:Signal transduction mechanisms	KAF6984899.1	hypothetical protein CFC21_002842 [Triticum aestivum]	sp|Q9M0X5|CRK25_ARATH;	Cysteine-rich receptor-like protein kinase 25 OS=Arabidopsis thaliana OX=3702 GN=CRK25 PE=3 SV=1;	PF07714.19;PF00069.27;PF01657.19	PK_Tyr_Ser-Thr;Pkinase;Stress-antifung	Protein tyrosine and serine/threonine kinase;Protein kinase domain;Salt stress response/antifungal
TraesCS1A02G277000	3.79417	8.7525	-1.20591	-	GO:0055085;GO:0016021;GO:002285	BP:transmembrane transport;CC:integral component of membrane;MF:transmembrane transporter activity;	K15287	SLC35F1_2	------	------	COG0697;COG0697	E:Amino acid transport and metabolism;G:Carbohydrate transport and metabolism	XP_037417719.1	solute carrier family 35 member F2-like [Triticum dicoccoides]	sp|Q8IXU6|S35F2_HUMAN;	Solute carrier family 35 member F2 OS=Homo sapiens OX=9606 GN=SLC35F2 PE=1 SV=1;	PF06027.14;PF00892.22;PF08449.13;PF08627.12	SLC35F;EamA;UAA;CRT-like	Solute carrier family 35;EamA-like transporter family;UAA transporter family;CRT-like, chloroquine-resistance transporter-like
TraesCS1A02G278600	5.10667	2.53333	1.01135	-	GO:0006396;GO:000551	BP:RNA processing;MF:protein binding;	------	------	------	------	ENOG4111RQ5	S:Function unknown	VAH07938.1	unnamed protein product [Triticum turgidum subsp. durum]	------	------	PF14559.8;PF13432.8;PF13428.8	TPR_19;TPR_16;TPR_14	Tetratricopeptide repeat;Tetratricopeptide repeat;Tetratricopeptide repeat
TraesCS1A02G279000	3.835	8.07417	-1.07409	-	GO:0005975;GO:0005576;GO:0102483;GO:0008422;GO:000455	BP:carbohydrate metabolic process;CC:extracellular region;MF:scopolin beta-glucosidase activity;MF:beta-glucosidase activity;MF:hydrolase activity, hydrolyzing O-glycosyl compounds;	K05349	bglX	map00460;map00940;map00500	Cyanoamino acid metabolism;Phenylpropanoid biosynthesis;Starch and sucrose metabolism	COG1472	G:Carbohydrate transport and metabolism	KAF6984955.1	hypothetical protein CFC21_002887 [Triticum aestivum]	sp|A7LXU3|BGH3B_BACO1;	Beta-glucosidase BoGH3B OS=Bacteroides ovatus;	PF00933.23;PF01915.24	Glyco_hydro_3;Glyco_hydro_3_C	Glycosyl hydrolase family 3 N terminal domain;Glycosyl hydrolase family 3 C-terminal domain
TraesCS1A02G280500	10.7633	4.65417	1.20953	-	------	------	------	------	------	------	ENOG410ZDTK	S:Function unknown	XP_037418136.1	proline-rich protein 12-like [Triticum dicoccoides]	------	------	------	------	------
TraesCS1A02G280700	21.3717	53.3992	-1.32112	-	------	------	------	------	------	------	ENOG410YI8C	T:Signal transduction mechanisms	XP_037418153.1	universal stress protein PHOS32-like [Triticum dicoccoides]	sp|Q8VYN9|PHO32_ARATH;	Universal stress protein PHOS32 OS=Arabidopsis thaliana OX=3702 GN=PHOS32 PE=1 SV=1;	PF00582.28	Usp	Universal stress protein family
TraesCS1A02G281000	34.0958	12.06	1.49937	-	------	------	------	------	------	------	ENOG410ZBIG	S:Function unknown	XP_037418176.1	uncharacterized protein LOC119281865 isoform X1 [Triticum dicoccoides]	------	------	------	------	------
TraesCS1A02G285000	333.297	26.2333	3.66733	-	GO:0034620;GO:0051085;GO:0042026;GO:0005737;GO:0031072;GO:0044183;GO:0051082;GO:0051787;GO:0016887;GO:000552	BP:cellular response to unfolded protein;BP:chaperone mediated protein folding requiring cofactor;BP:protein refolding;CC:cytoplasm;MF:heat shock protein binding;MF:protein binding involved in protein folding;MF:unfolded protein binding;MF:misfolded protein binding;MF:ATPase activity;MF:ATP binding;	K03283	HSPA1s	map04144;map04141;map03040	Endocytosis;Protein processing in endoplasmic reticulum;Spliceosome	COG0443	O:Posttranslational modification, protein turnover, chaperones	XP_037418584.1	heat shock 70 kDa protein 4-like [Triticum dicoccoides]	sp|Q9LHA8|HS704_ARATH;	Heat shock 70 kDa protein 4 OS=Arabidopsis thaliana OX=3702 GN=HSP70-4 PE=1 SV=1;	PF00012.22;PF06723.15	HSP70;MreB_Mbl	Hsp70 protein;MreB/Mbl protein
TraesCS1A02G286700	0.738333	1.91667	-1.37626	-	GO:000551	MF:protein binding;	------	------	------	------	ENOG41103M2	S:Function unknown	KAF6985041.1	hypothetical protein CFC21_002958 [Triticum aestivum]	sp|Q6DR20|FB110_ARATH;	F-box protein At2g17036 OS=Arabidopsis thaliana OX=3702 GN=At2g17036 PE=2 SV=1;	PF03478.20	DUF295	Protein of unknown function
TraesCS1A02G290400	12.8267	3.75	1.77418	-	GO:0046658;GO:0016021;GO:000905	CC:anchored component of plasma membrane;CC:integral component of membrane;MF:electron carrier activity;	------	------	------	------	ENOG410YT2D	S:Function unknown	XP_037440338.1	mavicyanin-like [Triticum dicoccoides]	sp|O82081|UCC1_ARATH;	Uclacyanin 1 OS=Arabidopsis thaliana OX=3702 GN=UCC1 PE=1 SV=1;	PF02298.19	Cu_bind_like	Plastocyanin-like domain
TraesCS1A02G296300	10.2758	5.0375	1.02848	-	GO:0006468;GO:0016021;GO:0005524;GO:000467	BP:protein phosphorylation;CC:integral component of membrane;MF:ATP binding;MF:protein kinase activity;	------	------	------	------	COG0515	T:Signal transduction mechanisms	KAF6985152.1	hypothetical protein CFC21_003046 [Triticum aestivum]	sp|C0LGQ4|MDIS2_ARATH;	Protein MALE DISCOVERER 2 OS=Arabidopsis thaliana OX=3702 GN=MDIS2 PE=1 SV=1;	PF07714.19;PF00069.27;PF08263.14;PF13855.8	PK_Tyr_Ser-Thr;Pkinase;LRRNT_2;LRR_8	Protein tyrosine and serine/threonine kinase;Protein kinase domain;Leucine rich repeat N-terminal domain;Leucine rich repeat
TraesCS1A02G298600	10.9292	4.63083	1.23884	-	GO:0006355;GO:0005634;GO:0003700;GO:0043565;GO:000367	BP:regulation of transcription, DNA-templated;CC:nucleus;MF:transcription factor activity, sequence-specific DNA binding;MF:sequence-specific DNA binding;MF:DNA binding;	K13424	WRKY33	map04016;map04626	MAPK signaling pathway - plant;Plant-pathogen interaction	ENOG410YHVA;ENOG4112BTF	K:Transcription;	VAH08442.1	unnamed protein product [Triticum turgidum subsp. durum]	sp|Q6IEQ7|WRK24_ORYSJ;	WRKY transcription factor WRKY24 OS=Oryza sativa subsp. japonica OX=39947 GN=WRKY24 PE=2 SV=1;	PF03106.17	WRKY	WRKY DNA -binding domain
TraesCS1A02G300000	5.32417	2.47583	1.10464	RING-type E3 ubiquitin transferase [Source:UniProtKB/TrEMBL;Acc:A0A341NR74]	GO:0016567;GO:0051865;GO:0005737;GO:0005634;GO:0005515;GO:000484	BP:protein ubiquitination;BP:protein autoubiquitination;CC:cytoplasm;CC:nucleus;MF:protein binding;MF:ubiquitin-protein transferase activity;	------	------	------	------	ENOG410XQT6;ENOG410XRTN	S:Function unknown;	KAF6985177.1	hypothetical protein CFC21_003073 [Triticum aestivum]	sp|Q9LZW3|PUB16_ARATH;	U-box domain-containing protein 16 OS=Arabidopsis thaliana OX=3702 GN=PUB16 PE=2 SV=1;	PF04564.17;PF00514.25;PF04826.15;PF13646.8;PF11789.10	U-box;Arm;Arm_2;HEAT_2;zf-Nse	U-box domain;Armadillo/beta-catenin-like repeat;Armadillo-like;HEAT repeats;Zinc-finger of the MIZ type in Nse subunit
TraesCS1A02G301100	3.92417	1.37	1.51821	-	GO:0006355;GO:0050896;GO:0005634;GO:0043565;GO:0003700;GO:000367	BP:regulation of transcription, DNA-templated;BP:response to stimulus;CC:nucleus;MF:sequence-specific DNA binding;MF:transcription factor activity, sequence-specific DNA binding;MF:DNA binding;	------	------	------	------	ENOG410YZZH	K:Transcription	KAF6985189.1	hypothetical protein CFC21_003084 [Triticum aestivum]	sp|Q9LY00|WRK70_ARATH;	Probable WRKY transcription factor 70 OS=Arabidopsis thaliana OX=3702 GN=WRKY70 PE=1 SV=1;	PF03106.17	WRKY	WRKY DNA -binding domain
TraesCS1A02G304500	0.245	2.66083	-3.44102	Peroxidase [Source:UniProtKB/TrEMBL;Acc:A0A341P128]	GO:0006979;GO:0042744;GO:0005576;GO:0020037;GO:0046872;GO:000460	BP:response to oxidative stress;BP:hydrogen peroxide catabolic process;CC:extracellular region;MF:heme binding;MF:metal ion binding;MF:peroxidase activity;	K00430	E1.11.1.7	map00940	Phenylpropanoid biosynthesis	ENOG41104SB	S:Function unknown	KAF6985230.1	hypothetical protein CFC21_003121 [Triticum aestivum]	sp|Q9FEQ8|PER2_MAIZE;	Peroxidase 2 OS=Zea mays OX=4577 GN=PER2 PE=2 SV=1;	PF00141.25	peroxidase	Peroxidase
TraesCS1A02G304600	0.050833	0.323333	-2.66918	Peroxidase [Source:UniProtKB/TrEMBL;Acc:A0A1D5S058]	GO:0006979;GO:0042744;GO:0005576;GO:0020037;GO:0046872;GO:000460	BP:response to oxidative stress;BP:hydrogen peroxide catabolic process;CC:extracellular region;MF:heme binding;MF:metal ion binding;MF:peroxidase activity;	K00430	E1.11.1.7	map00940	Phenylpropanoid biosynthesis	ENOG41104SB	S:Function unknown	XP_037444104.1	peroxidase 2-like [Triticum dicoccoides]	sp|Q9FEQ8|PER2_MAIZE;	Peroxidase 2 OS=Zea mays OX=4577 GN=PER2 PE=2 SV=1;	PF00141.25	peroxidase	Peroxidase
TraesCS1A02G304700	0.18	0.019167	3.2313	-	GO:0006974;GO:0006281;GO:004687	BP:cellular response to DNA damage stimulus;BP:DNA repair;MF:metal ion binding;	K10683	BARD1	map03440	Homologous recombination	ENOG41120NI;ENOG410XVPD	S:Function unknown;	VAH08594.1	unnamed protein product [Triticum turgidum subsp. durum]	sp|F4I443|BARD1_ARATH;	BRCA1-associated RING domain protein 1 OS=Arabidopsis thaliana OX=3702 GN=BARD1 PE=1 SV=1;	PF00533.28;PF13771.8;PF13832.8;PF16589.7	BRCT;zf-HC5HC2H;zf-HC5HC2H_2;BRCT_2	BRCA1 C Terminus;PHD-like zinc-binding domain;PHD-zinc-finger like domain;BRCT domain, a BRCA1 C-terminus domain
TraesCS1A02G305300	4.38167	2.10667	1.05652	-	GO:001602	CC:integral component of membrane;	------	------	------	------	ENOG411053F	S:Function unknown	XP_037419429.1	uncharacterized protein LOC119284391 [Triticum dicoccoides]	------	------	------	------	------
TraesCS1A02G305600	0.605	0.196667	1.62118	-	GO:001602	CC:integral component of membrane;	------	------	------	------	------	------	RCV17182.1	hypothetical protein SETIT_3G199200v2 [Setaria italica]	------	------	------	------	------
TraesCS1A02G314300	34.405	15.9033	1.11329	Ethylene-responsive factor-like transcription factor ERFL2c [Source:UniProtKB/TrEMBL;Acc:A7XA05]	GO:0009414;GO:0009651;GO:0009733;GO:0010311;GO:0009737;GO:0009735;GO:0080027;GO:0009611;GO:0010337;GO:0010728;GO:0045892;GO:0009409;GO:0009751;GO:0010364;GO:0080113;GO:0009753;GO:2000068;GO:0009625;GO:0009723;GO:0006355;GO:0006351;GO:0080141;GO:0005634;GO:0003677;GO:0043565;GO:0003700;GO:000097	BP:response to water deprivation;BP:response to salt stress;BP:response to auxin;BP:lateral root formation;BP:response to abscisic acid;BP:response to cytokinin;BP:response to herbivore;BP:response to wounding;BP:regulation of salicylic acid metabolic process;BP:regulation of hydrogen peroxide biosynthetic process;BP:negative regulation of transcription, DNA-templated;BP:response to cold;BP:respo…	K09286	EREBP	------	------	ENOG410YQNQ;ENOG410YQ8J	K:Transcription;	XP_037420500.1	ethylene-responsive transcription factor 8-like [Triticum dicoccoides]	sp|Q9LW49|ERF4_NICSY;	Ethylene-responsive transcription factor 4 OS=Nicotiana sylvestris OX=4096 GN=ERF4 PE=2 SV=1;	PF00847.22	AP2	AP2 domain
TraesCS1A02G317800	1.00083	0.305	1.71432	-	GO:0006468;GO:0016310;GO:0016021;GO:0016020;GO:0016301;GO:0000166;GO:0016740;GO:0005515;GO:0004672;GO:000552	BP:protein phosphorylation;BP:phosphorylation;CC:integral component of membrane;CC:membrane;MF:kinase activity;MF:nucleotide binding;MF:transferase activity;MF:protein binding;MF:protein kinase activity;MF:ATP binding;	------	------	------	------	COG4886	S:Function unknown	KAF7096021.1	hypothetical protein CFC21_098038 [Triticum aestivum]	sp|C0LGP4|Y3475_ARATH;	Probable LRR receptor-like serine/threonine-protein kinase At3g47570 OS=Arabidopsis thaliana OX=3702 GN=At3g47570 PE=2 SV=1;	PF00069.27;PF07714.19;PF13855.8;PF12799.9;PF08263.14;PF03109.18	Pkinase;PK_Tyr_Ser-Thr;LRR_8;LRR_4;LRRNT_2;ABC1	Protein kinase domain;Protein tyrosine and serine/threonine kinase;Leucine rich repeat;Leucine Rich repeats;Leucine rich repeat N-terminal domain;ABC1 atypical kinase-like domain
TraesCS1A02G318300	0.31	2.1125	-2.76861	Peroxidase [Source:UniProtKB/TrEMBL;Acc:A0A341P1K1]	GO:0006979;GO:0042744;GO:0005576;GO:0020037;GO:0046872;GO:000460	BP:response to oxidative stress;BP:hydrogen peroxide catabolic process;CC:extracellular region;MF:heme binding;MF:metal ion binding;MF:peroxidase activity;	K00430	E1.11.1.7	map00940	Phenylpropanoid biosynthesis	ENOG410YDBA	G:Carbohydrate transport and metabolism	XP_037420917.1	peroxidase 1-like [Triticum dicoccoides]	sp|P37834|PER1_ORYSJ;	Peroxidase 1 OS=Oryza sativa subsp. japonica OX=39947 GN=PRX74 PE=2 SV=2;	PF00141.25	peroxidase	Peroxidase
TraesCS1A02G318400	0.100833	0.955	-3.24353	Peroxidase [Source:UniProtKB/TrEMBL;Acc:A0A341NSV0]	GO:0006979;GO:0042744;GO:0005576;GO:0020037;GO:0046872;GO:000460	BP:response to oxidative stress;BP:hydrogen peroxide catabolic process;CC:extracellular region;MF:heme binding;MF:metal ion binding;MF:peroxidase activity;	K00430	E1.11.1.7	map00940	Phenylpropanoid biosynthesis	ENOG410YDBA	G:Carbohydrate transport and metabolism	XP_037420922.1	peroxidase 1-like [Triticum dicoccoides]	sp|P37834|PER1_ORYSJ;	Peroxidase 1 OS=Oryza sativa subsp. japonica OX=39947 GN=PRX74 PE=2 SV=2;	PF00141.25	peroxidase	Peroxidase
TraesCS1A02G318500	0.19	1.02167	-2.42685	Peroxidase [Source:UniProtKB/TrEMBL;Acc:A0A1D5S0G0]	GO:0006979;GO:0042744;GO:0005576;GO:0020037;GO:0046872;GO:000460	BP:response to oxidative stress;BP:hydrogen peroxide catabolic process;CC:extracellular region;MF:heme binding;MF:metal ion binding;MF:peroxidase activity;	K00430	E1.11.1.7	map00940	Phenylpropanoid biosynthesis	ENOG410YDBA	G:Carbohydrate transport and metabolism	KAF6985382.1	hypothetical protein CFC21_003256 [Triticum aestivum]	sp|P37834|PER1_ORYSJ;	Peroxidase 1 OS=Oryza sativa subsp. japonica OX=39947 GN=PRX74 PE=2 SV=2;	PF00141.25	peroxidase	Peroxidase
TraesCS1A02G319000	0.780833	2.02833	-1.37721	Peroxidase [Source:UniProtKB/TrEMBL;Acc:A0A341NRV8]	GO:0006979;GO:0042744;GO:0005576;GO:0009505;GO:0009506;GO:0020037;GO:0046872;GO:000460	BP:response to oxidative stress;BP:hydrogen peroxide catabolic process;CC:extracellular region;CC:plant-type cell wall;CC:plasmodesma;MF:heme binding;MF:metal ion binding;MF:peroxidase activity;	K00430	E1.11.1.7	map00940	Phenylpropanoid biosynthesis	ENOG41104RZ	S:Function unknown	XP_020173446.2	peroxidase 1 [Aegilops tauschii subsp. strangulata]	sp|P37834|PER1_ORYSJ;	Peroxidase 1 OS=Oryza sativa subsp. japonica OX=39947 GN=PRX74 PE=2 SV=2;	PF00141.25	peroxidase	Peroxidase
TraesCS1A02G320000	1.13583	0.025833	5.45839	-	GO:0046872;GO:001649	MF:metal ion binding;MF:oxidoreductase activity;	------	------	------	------	COG3491	S:Function unknown	KAF6985399.1	hypothetical protein CFC21_003272 [Triticum aestivum]	sp|Q94LP4|ODD11_ORYSJ;	2-oxoglutarate-dependent dioxygenase 11 OS=Oryza sativa subsp. japonica OX=39947 GN=2ODD11 PE=1 SV=1;	PF14226.8;PF03171.22	DIOX_N;2OG-FeII_Oxy	non-haem dioxygenase in morphine synthesis N-terminal;2OG-F
TraesCS1A02G321700	0.02	0.133333	-2.73696	-	GO:0006811;GO:0055085;GO:0016020;GO:0016021;GO:000521	BP:ion transport;BP:transmembrane transport;CC:membrane;CC:integral component of membrane;MF:ion channel activity;	K05391	CNGC	map04626	Plant-pathogen interaction	ENOG410XPSE	U:Intracellular trafficking, secretion, and vesicular transport	KAF6985433.1	hypothetical protein CFC21_003296 [Triticum aestivum]	sp|Q94AS9|CNGC4_ARATH;	Cyclic nucleotide-gated ion channel 4 OS=Arabidopsis thaliana OX=3702 GN=CNGC4 PE=2 SV=2;	PF00520.33;PF00027.31	Ion_trans;cNMP_binding	Ion transport protein;Cyclic nucleotide-binding domain
TraesCS1A02G323000	3.785	0.798333	2.24523	-	------	------	------	------	------	------	COG4886;ENOG41106XE	S:Function unknown;	VAH08990.1	unnamed protein product [Triticum turgidum subsp. durum]	sp|Q7XBQ9|RGA2_SOLBU;	Disease resistance protein RGA2 OS=Solanum bulbocastanum OX=147425 GN=RGA2 PE=1 SV=1;	PF00931.24;PF18052.3	NB-ARC;Rx_N	NB-ARC domain;Rx N-terminal domain
TraesCS1A02G324000	0.660833	1.65167	-1.32157	-	GO:0009658;GO:0010438;GO:0010439;GO:0009579;GO:0009536;GO:000551	BP:chloroplast organization;BP:cellular response to sulfur starvation;BP:regulation of glucosinolate biosynthetic process;CC:thylakoid;CC:plastid;MF:protein binding;	------	------	------	------	ENOG410YFAS	S:Function unknown	XP_037421239.1	protein SULFUR DEFICIENCY-INDUCED 2-like [Triticum dicoccoides]	sp|Q8L730|SDI2_ARATH;	Protein SULFUR DEFICIENCY-INDUCED 2 OS=Arabidopsis thaliana OX=3702 GN=At1g04770 PE=2 SV=1;	PF13181.8;PF07719.19;PF00515.30;PF13424.8;PF13176.8;PF13432.8;PF13374.8;PF12895.9	TPR_8;TPR_2;TPR_1;TPR_12;TPR_7;TPR_16;TPR_10;ANAPC3	Tetratricopeptide repeat;Tetratricopeptide repeat;Tetratricopeptide repeat;Tetratricopeptide repeat;Tetratricopeptide repeat;Tetratricopeptide repeat;Tetratricopeptide repeat;Anaphase-promoting complex, cyclosome, subunit 3
TraesCS1A02G331300	0.269167	0.835833	-1.63471	-	GO:0046872;GO:001649	MF:metal ion binding;MF:oxidoreductase activity;	------	------	------	------	COG3491	S:Function unknown	KAF6985547.1	hypothetical protein CFC21_003393 [Triticum aestivum]	sp|Q94LP4|ODD11_ORYSJ;	2-oxoglutarate-dependent dioxygenase 11 OS=Oryza sativa subsp. japonica OX=39947 GN=2ODD11 PE=1 SV=1;	PF14226.8;PF03171.22	DIOX_N;2OG-FeII_Oxy	non-haem dioxygenase in morphine synthesis N-terminal;2OG-F
TraesCS1A02G333600	13.3342	5.61333	1.2482	-	GO:0008360;GO:0007015;GO:0030865;GO:0007163;GO:0007264;GO:0032956;GO:0005737;GO:0005856;GO:0042995;GO:0043231;GO:0031410;GO:0005634;GO:0016020;GO:0005622;GO:0005938;GO:0005886;GO:0003924;GO:0019901;GO:000552	BP:regulation of cell shape;BP:actin filament organization;BP:cortical cytoskeleton organization;BP:establishment or maintenance of cell polarity;BP:small GTPase mediated signal transduction;BP:regulation of actin cytoskeleton organization;CC:cytoplasm;CC:cytoskeleton;CC:cell projection;CC:intracellular membrane-bounded organelle;CC:cytoplasmic vesicle;CC:nucleus;CC:membrane;CC:intracellular;CC:c…	K04392	RAC1	map04145	Phagosome	COG1100	S:Function unknown	XP_020169314.1	rac-like GTP-binding protein 2 [Aegilops tauschii subsp. strangulata]	sp|Q68Y52|RAC2_ORYSJ;	Rac-like GTP-binding protein 2 OS=Oryza sativa subsp. japonica OX=39947 GN=RAC2 PE=2 SV=1;	PF00071.24;PF08477.15;PF00025.23	Ras;Roc;Arf	Ras family;Ras of Complex, Roc, domain of DAPkinase;ADP-ribosylation factor family
TraesCS1A02G333800	4.25583	2.11917	1.00594	Non-specific serine/threonine protein kinase [Source:UniProtKB/TrEMBL;Acc:A0A1D5RXG7]	GO:0006468;GO:0106311;GO:0007165;GO:0016021;GO:0004674;GO:0004672;GO:0005524;GO:010631	BP:protein phosphorylation;BP:old GO;BP:signal transduction;CC:integral component of membrane;MF:protein serine/threonine kinase activity;MF:protein kinase activity;MF:ATP binding;MF:old GO;	------	------	------	------	COG0515	T:Signal transduction mechanisms	XP_037422222.1	CBL-interacting protein kinase 19-like [Triticum dicoccoides]	sp|Q68Y49|CIPKJ_ORYSJ;	CBL-interacting protein kinase 19 OS=Oryza sativa subsp. japonica OX=39947 GN=CIPK19 PE=1 SV=1;	PF00069.27;PF07714.19;PF03822.16;PF03109.18;PF14531.8;PF01163.24	Pkinase;PK_Tyr_Ser-Thr;NAF;ABC1;Kinase-like;RIO1	Protein kinase domain;Protein tyrosine and serine/threonine kinase;NAF domain;ABC1 atypical kinase-like domain;Kinase-like;RIO1 family
TraesCS1A02G335100	1.9025	9.7425	-2.3564	-	GO:0032259;GO:0008168;GO:0046983;GO:000817	BP:methylation;MF:methyltransferase activity;MF:protein dimerization activity;MF:O-methyltransferase activity;	------	------	------	------	ENOG410XS7T	S:Function unknown	VAH09283.1	unnamed protein product [Triticum turgidum subsp. durum]	sp|P47917|ZRP4_MAIZE;	O-methyltransferase ZRP4 OS=Zea mays OX=4577 GN=ZRP4 PE=2 SV=1;	PF00891.20;PF08100.13	Methyltransf_2;Dimerisation	O-methyltransferase domain;Dimerisation domain
TraesCS1A02G335400	0.97	3.3425	-1.78487	-	GO:0032259;GO:0008168;GO:0046983;GO:000817	BP:methylation;MF:methyltransferase activity;MF:protein dimerization activity;MF:O-methyltransferase activity;	------	------	------	------	ENOG410XS7T	S:Function unknown	KAF6985597.1	hypothetical protein CFC21_003438 [Triticum aestivum]	sp|P47917|ZRP4_MAIZE;	O-methyltransferase ZRP4 OS=Zea mays OX=4577 GN=ZRP4 PE=2 SV=1;	PF00891.20;PF08100.13	Methyltransf_2;Dimerisation	O-methyltransferase domain;Dimerisation domain
TraesCS1A02G335500	0.1375	0.831667	-2.59657	-	GO:0019438;GO:0032259;GO:0008757;GO:0008171;GO:0008168;GO:004698	BP:aromatic compound biosynthetic process;BP:methylation;MF:S-adenosylmethionine-dependent methyltransferase activity;MF:O-methyltransferase activity;MF:methyltransferase activity;MF:protein dimerization activity;	K22588	ASMT	map00380	Tryptophan metabolism	ENOG410XS7T	S:Function unknown	KAF6985598.1	hypothetical protein CFC21_003439 [Triticum aestivum]	sp|Q6EPG8|ASMT1_ORYSJ;	Acetylserotonin O-methyltransferase 1 OS=Oryza sativa subsp. japonica OX=39947 GN=ASMT1 PE=1 SV=1;	PF00891.20;PF08100.13	Methyltransf_2;Dimerisation	O-methyltransferase domain;Dimerisation domain
TraesCS1A02G339700	0.7525	3.18	-2.07926	-	------	------	------	------	------	------	ENOG410YC9T;ENOG410Y4T4	S:Function unknown;	XP_037422698.1	uncharacterized protein LOC119287282 [Triticum dicoccoides]	------	------	PF04720.14	PDDEXK_6	PDDEXK-like family of unknown function
TraesCS1A02G340100	21.265	0.089167	7.89776	-	GO:0034605;GO:0005737;GO:0016887;GO:0005524;GO:000016	BP:cellular response to heat;CC:cytoplasm;MF:ATPase activity;MF:ATP binding;MF:nucleotide binding;	K03695	clpB	------	------	COG0542	O:Posttranslational modification, protein turnover, chaperones	VAH09394.1	unnamed protein product [Triticum turgidum subsp. durum]	sp|Q6F2Y7|CLPB1_ORYSJ;	Chaperone protein ClpB1 OS=Oryza sativa subsp. japonica OX=39947 GN=CLPB1 PE=2 SV=1;	PF07724.16;PF17871.3;PF00004.31;PF10431.11;PF02861.22;PF07728.16;PF13401.8;PF13191.8;PF00158.28;PF20030.1;PF12775.9;PF05621.13	AAA_2;AAA_lid_9;AAA;ClpB_D2-small;Clp_N;AAA_5;AAA_22;AAA_16;Sigma54_activat;bpMoxR;AAA_7;TniB	AAA domain;AAA lid domain;ATPase family associated with various cellular activities;C-terminal, D2-small domain, of ClpB protein;Clp amino terminal domain, pathogenicity island component;AAA domain;AAA domain;AAA ATPase domain;Sigma-54 interaction domain;MoxR domain in the MoxR-vWA-beta-propeller ternary systems;P-loop containing dynein motor region;Bacterial TniB protein
TraesCS1A02G342600	13.9133	4.3575	1.6749	-	GO:0006468;GO:0016021;GO:0004674;GO:0005515;GO:0004672;GO:000552	BP:protein phosphorylation;CC:integral component of membrane;MF:protein serine/threonine kinase activity;MF:protein binding;MF:protein kinase activity;MF:ATP binding;	------	------	------	------	COG4886	S:Function unknown	KAF6985678.1	hypothetical protein CFC21_003509 [Triticum aestivum]	sp|Q9M0G7|MIK1_ARATH;	MDIS1-interacting receptor like kinase 1 OS=Arabidopsis thaliana OX=3702 GN=MIK1 PE=1 SV=1;	PF13855.8;PF07714.19;PF00069.27;PF12799.9;PF08263.14	LRR_8;PK_Tyr_Ser-Thr;Pkinase;LRR_4;LRRNT_2	Leucine rich repeat;Protein tyrosine and serine/threonine kinase;Protein kinase domain;Leucine Rich repeats;Leucine rich repeat N-terminal domain
TraesCS1A02G343200	1.57	0.194167	3.01539	-	GO:0055085;GO:0016021;GO:0140359;GO:0042626;GO:000552	BP:transmembrane transport;CC:integral component of membrane;MF:ABC-type transmembrane transporter activity;MF:ATPase activity, coupled to transmembrane movement of substances;MF:ATP binding;	------	------	------	------	COG1131	V:Defense mechanisms	KAF6985687.1	hypothetical protein CFC21_003515 [Triticum aestivum]	sp|Q9STT5|AB7A_ARATH;	ABC transporter A family member 7 OS=Arabidopsis thaliana OX=3702 GN=ABCA7 PE=3 SV=2;	PF00005.29;PF12698.9;PF13304.8	ABC_tran;ABC2_membrane_3;AAA_21	ABC transporter;ABC-2 family transporter protein;AAA domain, putative AbiEii toxin, Type IV TA system
TraesCS1A02G346300	0.809167	2.53917	-1.64985	-	GO:0006468;GO:0016021;GO:0004674;GO:0005515;GO:0004672;GO:000552	BP:protein phosphorylation;CC:integral component of membrane;MF:protein serine/threonine kinase activity;MF:protein binding;MF:protein kinase activity;MF:ATP binding;	------	------	------	------	COG0515	T:Signal transduction mechanisms	KAF6985720.1	hypothetical protein CFC21_003545 [Triticum aestivum]	sp|Q9LIG2|RLK6_ARATH;	Receptor-like protein kinase At3g21340 OS=Arabidopsis thaliana OX=3702 GN=At3g21340 PE=1 SV=1;	PF12819.9;PF07714.19;PF00069.27;PF13855.8;PF12799.9	Malectin_like;PK_Tyr_Ser-Thr;Pkinase;LRR_8;LRR_4	Malectin-like domain;Protein tyrosine and serine/threonine kinase;Protein kinase domain;Leucine rich repeat;Leucine Rich repeats
TraesCS1A02G347000	1.65333	0.389167	2.08692	-	GO:001602	CC:integral component of membrane;	------	------	------	------	ENOG4110485;ENOG410YMTZ	S:Function unknown;	KAF6985725.1	hypothetical protein CFC21_003551 [Triticum aestivum]	------	------	PF03168.15	LEA_2	Late embryogenesis abundant protein
TraesCS1A02G350400	1.53333	0.184167	3.05758	Heat stress transcription factor Spl7 (Heat shock transcription factor) (Heat shock factor RHSF10) [Source: Projected from Oryza sativa (Os05g0530400)]	GO:0060261;GO:0006355;GO:0006357;GO:0034605;GO:0005634;GO:0043565;GO:0003700;GO:0003677;GO:000097	BP:positive regulation of transcription initiation from RNA polymerase II promoter;BP:regulation of transcription, DNA-templated;BP:regulation of transcription from RNA polymerase II promoter;BP:cellular response to heat;CC:nucleus;MF:sequence-specific DNA binding;MF:transcription factor activity, sequence-specific DNA binding;MF:DNA binding;MF:RNA polymerase II core promoter proximal region sequ…	K09419	HSFF	------	------	COG5169	K:Transcription	KAF6985773.1	hypothetical protein CFC21_003589 [Triticum aestivum]	sp|Q93VB5|HFA4D_ORYSJ;	Heat stress transcription factor A-4d OS=Oryza sativa subsp. japonica OX=39947 GN=HSFA4D PE=1 SV=1;	PF00447.19;PF15070.8	HSF_DNA-bind;GOLGA2L5	HSF-type DNA-binding;Putative golgin subfamily A member 2-like protein 5
TraesCS1A02G352500	1.78583	0.644167	1.47109	-	GO:001602	CC:integral component of membrane;	------	------	------	------	COG1963	S:Function unknown	XP_037423643.1	uncharacterized protein LOC119288118 [Triticum dicoccoides]	sp|O32107|YUID_BACSU;	Uncharacterized membrane protein YuiD OS=Bacillus subtilis;	PF02681.16;PF01569.23	DUF212;PAP2	Divergent PAP2 family;PAP2 superfamily
TraesCS1A02G358100	4.82333	1.3675	1.81849	-	GO:0006355;GO:0005634;GO:0003700;GO:004356	BP:regulation of transcription, DNA-templated;CC:nucleus;MF:transcription factor activity, sequence-specific DNA binding;MF:sequence-specific DNA binding;	------	------	------	------	ENOG410YQZM	K:Transcription	KAF6985863.1	hypothetical protein CFC21_003680 [Triticum aestivum]	sp|Q93WU9|WRK51_ARATH;	Probable WRKY transcription factor 51 OS=Arabidopsis thaliana OX=3702 GN=WRKY51 PE=1 SV=1;	PF03106.17	WRKY	WRKY DNA -binding domain
TraesCS1A02G358400	10.9492	2.7825	1.97637	-	GO:0006355;GO:0005634;GO:0003700;GO:004356	BP:regulation of transcription, DNA-templated;CC:nucleus;MF:transcription factor activity, sequence-specific DNA binding;MF:sequence-specific DNA binding;	------	------	------	------	ENOG410YQZM	K:Transcription	XP_037424086.1	probable WRKY transcription factor 75 [Triticum dicoccoides]	sp|Q8VWQ5|WRK50_ARATH;	Probable WRKY transcription factor 50 OS=Arabidopsis thaliana OX=3702 GN=WRKY50 PE=2 SV=1;	PF03106.17	WRKY	WRKY DNA -binding domain
TraesCS1A02G358900	0.023333	0.245	-3.39234	Sulfotransferase [Source:UniProtKB/TrEMBL;Acc:A0A341NRF4]	GO:000814	MF:sulfotransferase activity;	------	------	------	------	ENOG4111H56	S:Function unknown	VAH09882.1	unnamed protein product [Triticum turgidum subsp. durum]	sp|Q9C9D0|SOT16_ARATH;	Cytosolic sulfotransferase 16 OS=Arabidopsis thaliana OX=3702 GN=SOT16 PE=1 SV=1;	PF00685.29;PF13469.8	Sulfotransfer_1;Sulfotransfer_3	Sulfotransferase domain;Sulfotransferase family
TraesCS1A02G359100	5.385	2.59333	1.05414	-	GO:0006468;GO:0070816;GO:0032968;GO:0000307;GO:0005634;GO:0004674;GO:0004672;GO:0004693;GO:0008353;GO:000552	BP:protein phosphorylation;BP:phosphorylation of RNA polymerase II C-terminal domain;BP:positive regulation of transcription elongation from RNA polymerase II promoter;CC:cyclin-dependent protein kinase holoenzyme complex;CC:nucleus;MF:protein serine/threonine kinase activity;MF:protein kinase activity;MF:cyclin-dependent protein serine/threonine kinase activity;MF:RNA polymerase II carboxy-termi…	K08818	CDC2L	------	------	ENOG410XQ50	T:Signal transduction mechanisms	KAF6985869.1	hypothetical protein CFC21_003686 [Triticum aestivum]	sp|Q2QSL4|CDKF2_ORYSJ;	Putative cyclin-dependent kinase F-2 OS=Oryza sativa subsp. japonica OX=39947 GN=CDKF-2 PE=3 SV=1;	PF00069.27;PF07714.19;PF01636.25;PF03109.18;PF06293.16	Pkinase;PK_Tyr_Ser-Thr;APH;ABC1;Kdo	Protein kinase domain;Protein tyrosine and serine/threonine kinase;Phosphotransferase enzyme family;ABC1 atypical kinase-like domain;Lipopolysaccharide kinase
TraesCS1A02G362100	13.8692	6.17917	1.1664	-	GO:001602	CC:integral component of membrane;	------	------	------	------	ENOG410Z9QH	S:Function unknown	XP_037424396.1	pathogen-associated molecular patterns-induced protein A70-like [Triticum dicoccoides]	------	------	PF05553.13;PF14364.8	DUF761;DUF4408	Cotton fibre expressed protein;Domain of unknown function
TraesCS1A02G362800	0.053333	0.004167	3.67795	-	GO:0048587;GO:0006355;GO:0048586;GO:0005634;GO:004698	BP:regulation of short-day photoperiodism, flowering;BP:regulation of transcription, DNA-templated;BP:regulation of long-day photoperiodism, flowering;CC:nucleus;MF:protein dimerization activity;	------	------	------	------	ENOG411067N	S:Function unknown	XP_037457122.1	transcription factor LATE FLOWERING-like [Triticum dicoccoides]	sp|A0A0P0WQ90|LF_ORYSJ;	Transcription factor LATE FLOWERING OS=Oryza sativa subsp. japonica OX=39947 GN=LF PE=1 SV=1;	PF00010.28	HLH	Helix-loop-helix DNA-binding domain
TraesCS1A02G365300	0.108333	1.90667	-4.13751	-	GO:0005975;GO:0005618;GO:000465	BP:carbohydrate metabolic process;CC:cell wall;MF:polygalacturonase activity;	K01213	E3.2.1.67	map00040	Pentose and glucuronate interconversions	COG5434	M:Cell wall/membrane/envelope biogenesis	KAF6985941.1	hypothetical protein CFC21_003743 [Triticum aestivum]	sp|Q94AJ5|PGLR5_ARATH;	Probable polygalacturonase At1g80170 OS=Arabidopsis thaliana OX=3702 GN=At1g80170 PE=1 SV=1;	PF00295.19	Glyco_hydro_28	Glycosyl hydrolases family 28
TraesCS1A02G372700	0.293333	0.021667	3.75897	-	------	------	------	------	------	------	ENOG410Y7TD	S:Function unknown	KAF6986021.1	hypothetical protein CFC21_003818 [Triticum aestivum]	------	------	------	------	------
TraesCS1A02G374700	0.955	0.278333	1.77869	-	GO:0006468;GO:0016021;GO:0030247;GO:0004674;GO:0004672;GO:000552	BP:protein phosphorylation;CC:integral component of membrane;MF:polysaccharide binding;MF:protein serine/threonine kinase activity;MF:protein kinase activity;MF:ATP binding;	------	------	------	------	COG0515	T:Signal transduction mechanisms	KAF6986044.1	hypothetical protein CFC21_003838 [Triticum aestivum]	sp|P0C5E2|LRL12_ARATH;	LEAF RUST 10 DISEASE-RESISTANCE LOCUS RECEPTOR-LIKE PROTEIN KINASE-like 1.2 OS=Arabidopsis thaliana OX=3702 GN=LRK10L-1.2 PE=2 SV=3;	PF07714.19;PF00069.27;PF13947.8;PF14380.8	PK_Tyr_Ser-Thr;Pkinase;GUB_WAK_bind;WAK_assoc	Protein tyrosine and serine/threonine kinase;Protein kinase domain;Wall-associated receptor kinase galacturonan-binding;Wall-associated receptor kinase C-terminal
TraesCS1A02G375600	115.122	7.8275	3.87846	Heat shock transcription factor A6e [Source:UniProtKB/TrEMBL;Acc:W4ZRM4]	GO:0006355;GO:0006357;GO:0034605;GO:0005634;GO:0043565;GO:0003700;GO:0003677;GO:0000978;GO:004280	BP:regulation of transcription, DNA-templated;BP:regulation of transcription from RNA polymerase II promoter;BP:cellular response to heat;CC:nucleus;MF:sequence-specific DNA binding;MF:transcription factor activity, sequence-specific DNA binding;MF:DNA binding;MF:RNA polymerase II core promoter proximal region sequence-specific DNA binding;MF:identical protein binding;	K09419;K08967	HSFF;mtnD, mtnZ, ADI1	map00270	Cysteine and methionine metabolism	COG5169	K:Transcription	XP_037425119.1	heat stress transcription factor A-2c-like [Triticum dicoccoides]	sp|Q338B0|HFA2C_ORYSJ;	Heat stress transcription factor A-2c OS=Oryza sativa subsp. japonica OX=39947 GN=HSFA2C PE=1 SV=2;	PF00447.19	HSF_DNA-bind	HSF-type DNA-binding
TraesCS1A02G376300	0.54	0.216667	1.31748	-	GO:0006400;GO:0008033;GO:0005739;GO:0016740;GO:005238	BP:tRNA modification;BP:tRNA processing;CC:mitochondrion;MF:transferase activity;MF:tRNA dimethylallyltransferase activity;	K10760	IPT	map00908	Zeatin biosynthesis	COG0324	J:Translation, ribosomal structure and biogenesis	KAF6986067.1	hypothetical protein CFC21_003858 [Triticum aestivum]	sp|Q5GHF7|IPT_HUMLU;	Adenylate isopentenyltransferase OS=Humulus lupulus OX=3486 PE=1 SV=1;	PF01715.19;PF01745.18;PF13671.8	IPPT;IPT;AAA_33	IPP transferase;Isopentenyl transferase;AAA domain
TraesCS1A02G386500	2.2425	1.03917	1.10968	-	GO:0016021;GO:0016020;GO:0008375;GO:001675	CC:integral component of membrane;CC:membrane;MF:acetylglucosaminyltransferase activity;MF:transferase activity, transferring glycosyl groups;	------	------	------	------	ENOG410YEMA	S:Function unknown	KAF6986206.1	hypothetical protein CFC21_003993 [Triticum aestivum]	sp|Q65XS5|BC10_ORYSJ;	Glycosyltransferase BC10 OS=Oryza sativa subsp. japonica OX=39947 GN=BC10 PE=1 SV=1;	PF02485.23	Branch	Core-2/I-Branching enzyme
TraesCS1A02G389300	9.26083	2.58917	1.83865	Endoglucanase [Source:UniProtKB/TrEMBL;Acc:A0A1D6RDC6]	GO:0005975;GO:0030245;GO:0016021;GO:0005576;GO:0008810;GO:0030246;GO:000455	BP:carbohydrate metabolic process;BP:cellulose catabolic process;CC:integral component of membrane;CC:extracellular region;MF:cellulase activity;MF:carbohydrate binding;MF:hydrolase activity, hydrolyzing O-glycosyl compounds;	K01179	E3.2.1.4	map00500	Starch and sucrose metabolism	ENOG410XPC9	G:Carbohydrate transport and metabolism	KAF6986229.1	hypothetical protein CFC21_004015 [Triticum aestivum]	sp|Q6L4I2|GUN15_ORYSJ;	Endoglucanase 15 OS=Oryza sativa subsp. japonica OX=39947 GN=Os05g0212300 PE=2 SV=1;	PF00759.21;PF09478.12	Glyco_hydro_9;CBM49	Glycosyl hydrolase family 9;Carbohydrate binding domain CBM49
TraesCS1A02G389800	1.91333	5.015	-1.39016	-	GO:000370	MF:transcription factor activity, sequence-specific DNA binding;	------	------	------	------	ENOG410Z28R	S:Function unknown	XP_037464984.1	protein SPEAR3-like [Triticum dicoccoides]	sp|Q6IDB0|SPER3_ARATH;	Protein SPEAR3 OS=Arabidopsis thaliana OX=3702 GN=SPEAR3 PE=1 SV=1;	------	------	------
TraesCS1A02G394100	4.12917	0.715833	2.52816	-	GO:0016021;GO:000550	CC:integral component of membrane;MF:calcium ion binding;	K02183	CALM	map04626;map04070;map04016	Plant-pathogen interaction;Phosphatidylinositol signaling system;MAPK signaling pathway - plant	COG5126;COG5126;COG5126	D:Cell cycle control, cell division, chromosome partitioning;T:Signal transduction mechanisms;Z:Cytoskeleton	VAH10586.1	unnamed protein product [Triticum turgidum subsp. durum]	sp|Q93Z27|CML46_ARATH;	Probable calcium-binding protein CML46 OS=Arabidopsis thaliana OX=3702 GN=CML46 PE=1 SV=1;	PF00036.34;PF13499.8;PF13405.8;PF13833.8;PF00404.20;PF13202.8	EF-hand_1;EF-hand_7;EF-hand_6;EF-hand_8;Dockerin_1;EF-hand_5	EF hand;EF-hand domain pair;EF-hand domain;EF-hand domain pair;Dockerin type I domain;EF hand
TraesCS1A02G395300	47.1508	4.51083	3.38582	-	GO:0051085;GO:0006457;GO:0005829;GO:0051087;GO:005108	BP:chaperone mediated protein folding requiring cofactor;BP:protein folding;CC:cytosol;MF:chaperone binding;MF:unfolded protein binding;	K09510	DNAJB4	------	------	COG0484	O:Posttranslational modification, protein turnover, chaperones	XP_037426433.1	protein psi1-like [Triticum dicoccoides]	sp|Q9UDY4|DNJB4_HUMAN;	DnaJ homolog subfamily B member 4 OS=Homo sapiens OX=9606 GN=DNAJB4 PE=1 SV=1;	PF01556.20;PF00226.33	DnaJ_C;DnaJ	DnaJ C terminal domain;DnaJ domain
TraesCS1A02G396200	45.1558	107.237	-1.24781	Xyloglucan endotransglucosylase/hydrolase [Source:UniProtKB/TrEMBL;Acc:Q56TP3]	GO:0042546;GO:0005975;GO:0006073;GO:0009987;GO:0071555;GO:0008152;GO:0010411;GO:0005618;GO:0048046;GO:0005576;GO:0016787;GO:0016798;GO:0016762;GO:0016740;GO:000455	BP:cell wall biogenesis;BP:carbohydrate metabolic process;BP:cellular glucan metabolic process;BP:cellular process;BP:cell wall organization;BP:metabolic process;BP:xyloglucan metabolic process;CC:cell wall;CC:apoplast;CC:extracellular region;MF:hydrolase activity;MF:hydrolase activity, acting on glycosyl bonds;MF:xylogluca;MF:transferase activity;MF:hydrolase activity, hydrolyzing O-glycosyl com…	K08235	E2.4.1.207	------	------	COG2273	G:Carbohydrate transport and metabolism	XP_037426509.1	xyloglucan endotransglycosylase/hydrolase protein 8-like [Triticum dicoccoides]	sp|Q76BW5|XTH8_ORYSJ;	Xyloglucan endotransglycosylase/hydrolase protein 8 OS=Oryza sativa subsp. japonica OX=39947 GN=XTH8 PE=1 SV=1;	PF00722.23;PF06955.14	Glyco_hydro_16;XET_C	Glycosyl hydrolases family 16;Xyloglucan endo-transglycosylase
TraesCS1A02G396700	9.78417	28.8992	-1.56251	-	GO:0009409;GO:0009834;GO:0016021;GO:000588	BP:response to cold;BP:plant-type secondary cell wall biogenesis;CC:integral component of membrane;CC:plasma membrane;	------	------	------	------	ENOG410YJJE	M:Cell wall/membrane/envelope biogenesis	XP_037426557.1	fasciclin-like arabinogalactan protein 6 [Triticum dicoccoides]	sp|Q8LEJ6|FLA11_ARATH;	Fasciclin-like arabinogalactan protein 11 OS=Arabidopsis thaliana OX=3702 GN=FLA11 PE=2 SV=2;	PF02469.24	Fasciclin	Fasciclin domain
TraesCS1A02G396800	45.7692	97.8667	-1.09644	Fasciclin-like protein FLA15 [Source:UniProtKB/TrEMBL;Acc:Q06I91]	GO:0009834;GO:000588	BP:plant-type secondary cell wall biogenesis;CC:plasma membrane;	------	------	------	------	ENOG41108S6	S:Function unknown	ABI95405.1	fasciclin-like protein FLA15 [Triticum aestivum]	sp|Q8LEJ6|FLA11_ARATH;	Fasciclin-like arabinogalactan protein 11 OS=Arabidopsis thaliana OX=3702 GN=FLA11 PE=2 SV=2;	PF02469.24;PF11067.10	Fasciclin;DUF2868	Fasciclin domain;Protein of unknown function
TraesCS1A02G399900	0.893333	2.17667	-1.28485	-	GO:0055114;GO:0016021;GO:0020037;GO:001649	BP:oxidation-reduction process;CC:integral component of membrane;MF:heme binding;MF:oxidoreductase activity;	------	------	------	------	ENOG4111TB6	S:Function unknown	KAF6986348.1	hypothetical protein CFC21_004117 [Triticum aestivum]	sp|O80854|B561L_ARATH;	Cytochrome b561 domain-containing protein At2g30890 OS=Arabidopsis thaliana OX=3702 GN=At2g30890 PE=2 SV=1;	PF03188.18	Cytochrom_B561	Eukaryotic cytochrome b561
TraesCS1A02G400700	5.60417	1.90083	1.55987	-	------	------	------	------	------	------	ENOG41107G2;ENOG41105ZP;COG4886	S:Function unknown;	XP_037426849.1	uncharacterized protein LOC119292121 [Triticum dicoccoides]	------	------	------	------	------
TraesCS1A02G401800	2.44833	0.5325	2.20095	-	GO:0006355;GO:0005634;GO:0003700;GO:004356	BP:regulation of transcription, DNA-templated;CC:nucleus;MF:transcription factor activity, sequence-specific DNA binding;MF:sequence-specific DNA binding;	------	------	------	------	ENOG410YSII;ENOG410ZMEJ	K:Transcription;	KAF6986367.1	hypothetical protein CFC21_004137 [Triticum aestivum]	sp|Q93WV4|WRK71_ARATH;	WRKY transcription factor 71 OS=Arabidopsis thaliana OX=3702 GN=WRKY71 PE=2 SV=1;	PF03106.17	WRKY	WRKY DNA -binding domain
TraesCS1A02G406800	0.163333	1.4725	-3.17238	Expansin [Source:UniProtKB/TrEMBL;Acc:W4ZT13]	GO:0009664;GO:0071555;GO:0005618;GO:0016020;GO:000557	BP:plant-type cell wall organization;BP:cell wall organization;CC:cell wall;CC:membrane;CC:extracellular region;	------	------	------	------	ENOG41105MI	G:Carbohydrate transport and metabolism	KAF6986425.1	hypothetical protein CFC21_004184 [Triticum aestivum]	sp|Q75I75|EXP31_ORYSJ;	Expansin-A31 OS=Oryza sativa subsp. japonica OX=39947 GN=EXPA31 PE=2 SV=2;	PF01357.23;PF03330.20	Expansin_C;DPBB_1	Expansin C-terminal domain;Lytic transglycolase
TraesCS1A02G406900	0.115	1.145	-3.31564	Expansin [Source:UniProtKB/TrEMBL;Acc:A0A341NSZ1]	GO:0009664;GO:0071555;GO:0005618;GO:0016020;GO:0005576;GO:001678	BP:plant-type cell wall organization;BP:cell wall organization;CC:cell wall;CC:membrane;CC:extracellular region;MF:hydrolase activity;	------	------	------	------	ENOG41105MI	G:Carbohydrate transport and metabolism	KAF6986426.1	hypothetical protein CFC21_004185 [Triticum aestivum]	sp|Q75I75|EXP31_ORYSJ;	Expansin-A31 OS=Oryza sativa subsp. japonica OX=39947 GN=EXPA31 PE=2 SV=2;	PF01357.23;PF03330.20	Expansin_C;DPBB_1	Expansin C-terminal domain;Lytic transglycolase
TraesCS1A02G407900	0.735833	3.32417	-2.17554	Patatin [Source:UniProtKB/TrEMBL;Acc:W4ZTD0]	GO:0006629;GO:0016042;GO:001678	BP:lipid metabolic process;BP:lipid catabolic process;MF:hydrolase activity;	------	------	------	------	COG3621	S:Function unknown	KAF6986444.1	hypothetical protein CFC21_004201 [Triticum aestivum]	sp|A2YW91|PLP2_ORYSI;	Patatin-like protein 2 OS=Oryza sativa subsp. indica OX=39946 GN=PLP2 PE=3 SV=1;	PF01734.24	Patatin	Patatin-like phospholipase
TraesCS1A02G410700	7.09667	3.56667	0.992565	-	GO:0006355;GO:0005634;GO:0003700;GO:0000976;GO:004356	BP:regulation of transcription, DNA-templated;CC:nucleus;MF:transcription factor activity, sequence-specific DNA binding;MF:transcription regulatory region sequence-specific DNA binding;MF:sequence-specific DNA binding;	------	------	------	------	ENOG41104H2	S:Function unknown	KAF6986479.1	hypothetical protein CFC21_004228 [Triticum aestivum]	sp|Q0DFT7|WRK19_ORYSJ;	Transcription factor WRKY19 OS=Oryza sativa subsp. japonica OX=39947 GN=WRKY19 PE=2 SV=1;	PF03106.17	WRKY	WRKY DNA -binding domain
TraesCS1A02G414200	0.015	0.4225	-4.81592	-	------	------	------	------	------	------	ENOG41116XK	S:Function unknown	KAF6986517.1	hypothetical protein CFC21_004259 [Triticum aestivum]	------	------	PF05553.13	DUF761	Cotton fibre expressed protein
TraesCS1A02G414700	10.0725	2.34833	2.10071	-	------	------	------	------	------	------	ENOG410ZDQD;ENOG41107QD	S:Function unknown;	KAF6986523.1	hypothetical protein CFC21_004265 [Triticum aestivum]	------	------	------	------	------
TraesCS1A02G415300	0.659167	2.15583	-1.70953	Mitogen-activated protein kinase [Source:UniProtKB/TrEMBL;Acc:A0A1D5RXB0]	GO:0006468;GO:0035556;GO:0005737;GO:0005634;GO:0005622;GO:0004674;GO:0004707;GO:0106311;GO:0004672;GO:0005524;GO:010631	BP:protein phosphorylation;BP:intracellular signal transduction;CC:cytoplasm;CC:nucleus;CC:intracellular;MF:protein serine/threonine kinase activity;MF:MAP kinase activity;MF:old GO;MF:protein kinase activity;MF:ATP binding;MF:old GO;	------	------	------	------	ENOG410XNY0	T:Signal transduction mechanisms	XP_037427701.1	mitogen-activated protein kinase 17-like [Triticum dicoccoides]	sp|Q6L5F7|MPK17_ORYSJ;	Mitogen-activated protein kinase 17 OS=Oryza sativa subsp. japonica OX=39947 GN=MPK17 PE=2 SV=2;	PF00069.27;PF07714.19;PF06293.16	Pkinase;PK_Tyr_Ser-Thr;Kdo	Protein kinase domain;Protein tyrosine and serine/threonine kinase;Lipopolysaccharide kinase
TraesCS1A02G416100	8.1625	3.2825	1.31422	-	GO:000550	MF:calcium ion binding;	K13448	CML	map04626	Plant-pathogen interaction	COG5126;COG5126;COG5126	D:Cell cycle control, cell division, chromosome partitioning;T:Signal transduction mechanisms;Z:Cytoskeleton	KAF6986546.1	hypothetical protein CFC21_004284 [Triticum aestivum]	sp|Q6L5F4|CML14_ORYSJ;	Probable calcium-binding protein CML14 OS=Oryza sativa subsp. japonica OX=39947 GN=CML14 PE=2 SV=1;	PF00036.34;PF13499.8;PF13405.8;PF13202.8;PF13833.8;PF14658.8	EF-hand_1;EF-hand_7;EF-hand_6;EF-hand_5;EF-hand_8;EF-hand_9	EF hand;EF-hand domain pair;EF-hand domain;EF hand;EF-hand domain pair;EF-hand domain
TraesCS1A02G416700	8.85583	0.0225	8.62056	-	GO:0009061;GO:000697	BP:anaerobic respiration;BP:response to oxidative stress;	------	------	------	------	ENOG410YT9R	S:Function unknown	XP_037427760.1	uncharacterized protein LOC119293363 [Triticum dicoccoides]	------	------	------	------	------
TraesCS1A02G421200	1.7475	5.06833	-1.53622	Carboxypeptidase [Source:UniProtKB/TrEMBL;Acc:A0A1D5S077]	GO:0006508;GO:000418	BP:proteolysis;MF:serine-type carboxypeptidase activity;	K09645	CPVL	------	------	COG2939	E:Amino acid transport and metabolism	XP_037428043.1	serine carboxypeptidase-like 50 [Triticum dicoccoides]	sp|Q9M9Q6|SCP50_ARATH;	Serine carboxypeptidase-like 50 OS=Arabidopsis thaliana OX=3702 GN=SCPL50 PE=2 SV=1;	PF00450.24	Peptidase_S10	Serine carboxypeptidase
TraesCS1A02G423400	4.13667	1.13	1.87215	-	GO:0016020;GO:000588	CC:membrane;CC:plasma membrane;	------	------	------	------	ENOG41107TS;ENOG41107Z3	S:Function unknown;	KAF6986634.1	hypothetical protein CFC21_004361 [Triticum aestivum]	------	------	------	------	------
TraesCS1A02G424000	3.78667	0.525	2.85054	Glycosyltransferase [Source:UniProtKB/TrEMBL;Acc:A0A1D5RS38]	GO:0016758;GO:000819	MF:transferase activity, transferring hexosyl groups;MF:UDP-glycosyltransferase activity;	------	------	------	------	COG1819	S:Function unknown	KAF6986640.1	hypothetical protein CFC21_004367 [Triticum aestivum]	sp|Q9LK73|U88A1_ARATH;	UDP-glycosyltransferase 88A1 OS=Arabidopsis thaliana OX=3702 GN=UGT88A1 PE=2 SV=1;	PF00201.20	UDPGT	UDP-glucoronosyl and UDP-glucosyl transferase
TraesCS1A02G426300	7.35917	15.395	-1.06485	-	GO:0055085;GO:0016021;GO:0016020;GO:0022857;GO:001529	BP:transmembrane transport;CC:integral component of membrane;CC:membrane;MF:transmembrane transporter activity;MF:symporter activity;	------	------	------	------	ENOG410XNQK	G:Carbohydrate transport and metabolism	XP_037428411.1	putative polyol transporter 1 [Triticum dicoccoides]	sp|Q9XIH7|PLT1_ARATH;	Putative polyol transporter 1 OS=Arabidopsis thaliana OX=3702 GN=PLT1 PE=3 SV=1;	PF00083.26;PF07690.18	Sugar_tr;MFS_1	Sugar;Major Facilitator Superfamily
TraesCS1A02G430000	8.80917	1.65333	2.41363	-	GO:0016887;GO:000552	MF:ATPase activity;MF:ATP binding;	K08900	BCS1	------	------	COG0465	O:Posttranslational modification, protein turnover, chaperones	KAF6986723.1	hypothetical protein CFC21_004446 [Triticum aestivum]	sp|Q8VZG2|HSR4_ARATH;	Protein HYPER-SENSITIVITY-RELATED 4 OS=Arabidopsis thaliana OX=3702 GN=HSR4 PE=2 SV=1;	PF00004.31;PF13191.8;PF05496.14;PF05673.15;PF00910.24	AAA;AAA_16;RuvB_N;DUF815;RNA_helicase	ATPase family associated with various cellular activities;AAA ATPase domain;Holliday junction DNA helicase RuvB P-loop domain;Protein of unknown function;RNA helicase
TraesCS1A02G430100	1.47667	0.231667	2.67222	-	GO:0016887;GO:000552	MF:ATPase activity;MF:ATP binding;	K08900	BCS1	------	------	COG0465	O:Posttranslational modification, protein turnover, chaperones	EMS53319.1	putative mitochondrial chaperone BCS1-B [Triticum urartu]	sp|Q147F9|AATPC_ARATH;	AAA-ATPase At3g50940 OS=Arabidopsis thaliana OX=3702 GN=At3g50940 PE=2 SV=1;	PF14363.8;PF00004.31;PF05673.15;PF05496.14;PF13191.8;PF00910.24	AAA_assoc;AAA;DUF815;RuvB_N;AAA_16;RNA_helicase	Domain associated at C-terminal with AAA;ATPase family associated with various cellular activities;Protein of unknown function;Holliday junction DNA helicase RuvB P-loop domain;AAA ATPase domain;RNA helicase
TraesCS1A02G430200	3.32167	0.629167	2.40039	-	GO:0016887;GO:000552	MF:ATPase activity;MF:ATP binding;	K08900	BCS1	------	------	COG0465	O:Posttranslational modification, protein turnover, chaperones	XP_037479683.1	AAA-ATPase At3g50940-like [Triticum dicoccoides]	sp|Q8VZG2|HSR4_ARATH;	Protein HYPER-SENSITIVITY-RELATED 4 OS=Arabidopsis thaliana OX=3702 GN=HSR4 PE=2 SV=1;	PF14363.8;PF00004.31;PF05496.14;PF05673.15;PF13191.8	AAA_assoc;AAA;RuvB_N;DUF815;AAA_16	Domain associated at C-terminal with AAA;ATPase family associated with various cellular activities;Holliday junction DNA helicase RuvB P-loop domain;Protein of unknown function;AAA ATPase domain
TraesCS1A02G432300	0.045833	0.2375	-2.37347	-	GO:0009452;GO:0001510;GO:000816	BP:7-methylguanosine RNA capping;BP:RNA methylation;MF:methyltransferase activity;	K14292	TGS1	------	------	ENOG410XRUD	S:Function unknown	XP_037473020.1	trimethylguanosine synthase-like [Triticum dicoccoides]	sp|P85107|TGS1_RAT;	Trimethylguanosine synthase OS=Rattus norvegicus OX=10116 GN=Tgs1 PE=1 SV=1;	PF09445.12;PF02475.18;PF13649.8;PF01170.20;PF03602.17;PF13847.8	Methyltransf_15;Met_10;Methyltransf_25;UPF0020;Cons_hypoth95;Methyltransf_31	RNA cap guanine-N2 methyltransferase;Met-10+ like-protein;Methyltransferase domain;Putative RNA methylase family UPF0020;Conserved hypothetical protein 95;Methyltransferase domain
TraesCS1B02G001700	1.9375	0.598333	1.69518	-	GO:0016021;GO:0016705;GO:0004497;GO:0005506;GO:002003	CC:integral component of membrane;MF:oxidoreductase activity, acting on paired donors, with incorporation or reduction of molecular oxygen;MF:monooxygenase activity;MF:iron ion binding;MF:heme binding;	------	------	------	------	COG2124	Q:Secondary metabolites biosynthesis, transport and catabolism	KAF6986930.1	hypothetical protein CFC21_004619 [Triticum aestivum]	sp|Q9LUC6|C7A14_ARATH;	Cytochrome P450 72A14 OS=Arabidopsis thaliana OX=3702 GN=CYP72A14 PE=2 SV=1;	PF00067.24	p450	Cytochrome P450
TraesCS1B02G001900	2.34667	0.435	2.43153	-	GO:0016021;GO:0016705;GO:0004497;GO:0005506;GO:002003	CC:integral component of membrane;MF:oxidoreductase activity, acting on paired donors, with incorporation or reduction of molecular oxygen;MF:monooxygenase activity;MF:iron ion binding;MF:heme binding;	------	------	------	------	COG2124	Q:Secondary metabolites biosynthesis, transport and catabolism	KAF6986933.1	hypothetical protein CFC21_004621 [Triticum aestivum]	sp|Q9LUC6|C7A14_ARATH;	Cytochrome P450 72A14 OS=Arabidopsis thaliana OX=3702 GN=CYP72A14 PE=2 SV=1;	PF00067.24	p450	Cytochrome P450
TraesCS1B02G006500	0.083333	0.003333	4.64399	-	GO:0006468;GO:0016021;GO:0005524;GO:000467	BP:protein phosphorylation;CC:integral component of membrane;MF:ATP binding;MF:protein kinase activity;	------	------	------	------	------	------	KAF6986980.1	hypothetical protein CFC21_004660 [Triticum aestivum]	sp|Q8VZG8|MIK2_ARATH;	MDIS1-interacting receptor like kinase 2 OS=Arabidopsis thaliana OX=3702 GN=MIK2 PE=1 SV=3;	PF00069.27;PF07714.19;PF13855.8;PF12799.9;PF08263.14;PF17667.3	Pkinase;PK_Tyr_Ser-Thr;LRR_8;LRR_4;LRRNT_2;Pkinase_fungal	Protein kinase domain;Protein tyrosine and serine/threonine kinase;Leucine rich repeat;Leucine Rich repeats;Leucine rich repeat N-terminal domain;Fungal protein kinase
TraesCS1B02G006700	0.443333	0.02	4.47032	-	GO:0006468;GO:0016021;GO:0005524;GO:0005515;GO:000467	BP:protein phosphorylation;CC:integral component of membrane;MF:ATP binding;MF:protein binding;MF:protein kinase activity;	------	------	------	------	COG4886	S:Function unknown	KAF6986982.1	hypothetical protein CFC21_004662 [Triticum aestivum]	sp|Q8VZG8|MIK2_ARATH;	MDIS1-interacting receptor like kinase 2 OS=Arabidopsis thaliana OX=3702 GN=MIK2 PE=1 SV=3;	PF00069.27;PF13855.8;PF07714.19;PF12799.9	Pkinase;LRR_8;PK_Tyr_Ser-Thr;LRR_4	Protein kinase domain;Leucine rich repeat;Protein tyrosine and serine/threonine kinase;Leucine Rich repeats
TraesCS1B02G009500	0.759167	0.041667	4.18744	-	GO:0006468;GO:0016021;GO:0005524;GO:0005515;GO:000467	BP:protein phosphorylation;CC:integral component of membrane;MF:ATP binding;MF:protein binding;MF:protein kinase activity;	------	------	------	------	COG4886	S:Function unknown	KAF6987023.1	hypothetical protein CFC21_004695 [Triticum aestivum]	sp|Q8VZG8|MIK2_ARATH;	MDIS1-interacting receptor like kinase 2 OS=Arabidopsis thaliana OX=3702 GN=MIK2 PE=1 SV=3;	PF13855.8;PF00069.27;PF07714.19;PF12799.9;PF08263.14;PF17667.3	LRR_8;Pkinase;PK_Tyr_Ser-Thr;LRR_4;LRRNT_2;Pkinase_fungal	Leucine rich repeat;Protein kinase domain;Protein tyrosine and serine/threonine kinase;Leucine Rich repeats;Leucine rich repeat N-terminal domain;Fungal protein kinase
TraesCS1B02G012100	0.548333	1.14667	-1.06432	-	GO:0005524;GO:004353	MF:ATP binding;MF:ADP binding;	------	------	------	------	COG4886	S:Function unknown	KAF6987056.1	hypothetical protein CFC21_004734 [Triticum aestivum]	sp|Q7XA39|RGA4_SOLBU;	Putative disease resistance protein RGA4 OS=Solanum bulbocastanum OX=147425 GN=RGA4 PE=2 SV=1;	PF00931.24;PF18052.3;PF12799.9;PF05729.14;PF13855.8;PF13401.8	NB-ARC;Rx_N;LRR_4;NACHT;LRR_8;AAA_22	NB-ARC domain;Rx N-terminal domain;Leucine Rich repeats;NACHT domain;Leucine rich repeat;AAA domain
TraesCS1B02G012700	0.033333	0.263333	-2.98187	-	GO:0006952;GO:0005524;GO:004353	BP:defense response;MF:ATP binding;MF:ADP binding;	------	------	------	------	COG4886	S:Function unknown	KAF6987062.1	hypothetical protein CFC21_004740 [Triticum aestivum]	sp|Q2R8L1|RGA5S_ORYSJ;	Disease resistance protein RGA5 OS=Oryza sativa subsp. japonica OX=39947 GN=RGA5 PE=2 SV=1;	PF00931.24;PF13401.8;PF18052.3	NB-ARC;AAA_22;Rx_N	NB-ARC domain;AAA domain;Rx N-terminal domain
TraesCS1B02G014100	1.095	2.17667	-0.99119	-	GO:0006952;GO:0043531;GO:0005515;GO:000552	BP:defense response;MF:ADP binding;MF:protein binding;MF:ATP binding;	------	------	------	------	COG4886	S:Function unknown	KAF6987075.1	hypothetical protein CFC21_004753 [Triticum aestivum]	sp|Q7XA39|RGA4_SOLBU;	Putative disease resistance protein RGA4 OS=Solanum bulbocastanum OX=147425 GN=RGA4 PE=2 SV=1;	PF00931.24;PF12799.9;PF13855.8	NB-ARC;LRR_4;LRR_8	NB-ARC domain;Leucine Rich repeats;Leucine rich repeat
TraesCS1B02G018600	0.3475	0.005	6.11894	-	GO:0006468;GO:0048544;GO:0016021;GO:0005524;GO:0004672;GO:0106310;GO:010631	BP:protein phosphorylation;BP:recognition of pollen;CC:integral component of membrane;MF:ATP binding;MF:protein kinase activity;MF:old GO;MF:old GO;	------	------	------	------	COG0515	T:Signal transduction mechanisms	XP_037446145.1	G-type lectin S-receptor-like serine/threonine-protein kinase At2g19130 [Triticum dicoccoides]	sp|O64477|Y2913_ARATH;	G-type lectin S-receptor-like serine/threonine-protein kinase At2g19130 OS=Arabidopsis thaliana OX=3702 GN=At2g19130 PE=2 SV=1;	PF00069.27;PF07714.19;PF08276.13;PF00024.28;PF03109.18	Pkinase;PK_Tyr_Ser-Thr;PAN_2;PAN_1;ABC1	Protein kinase domain;Protein tyrosine and serine/threonine kinase;PAN-like domain;PAN domain;ABC1 atypical kinase-like domain
TraesCS1B02G019600	0.655833	0.105833	2.63154	-	GO:0006633;GO:0031408;GO:0003824;GO:0016491;GO:001018	BP:fatty acid biosynthetic process;BP:oxylipin biosynthetic process;MF:catalytic activity;MF:oxidoreductase activity;MF:FMN binding;	K05894	OPR	map00592	alpha-Linolenic acid metabolism	COG1902	C:Energy production and conversion	KAF6987139.1	hypothetical protein CFC21_004810 [Triticum aestivum]	sp|Q69TH8|OPR4_ORYSJ;	Putative 12-oxophytodienoate reductase 4 OS=Oryza sativa subsp. japonica OX=39947 GN=OPR4 PE=2 SV=1;	PF00724.22	Oxidored_FMN	NAD
TraesCS1B02G020700	0.4825	0.146667	1.71798	-	GO:0006468;GO:0016310;GO:0016021;GO:0016020;GO:0016301;GO:0030247;GO:0000166;GO:0004674;GO:0016740;GO:0004672;GO:000552	BP:protein phosphorylation;BP:phosphorylation;CC:integral component of membrane;CC:membrane;MF:kinase activity;MF:polysaccharide binding;MF:nucleotide binding;MF:protein serine/threonine kinase activity;MF:transferase activity;MF:protein kinase activity;MF:ATP binding;	------	------	------	------	COG0515	T:Signal transduction mechanisms	KAF6987149.1	hypothetical protein CFC21_004821 [Triticum aestivum]	sp|P93604|LRK10_WHEAT;	Rust resistance kinase Lr10 OS=Triticum aestivum OX=4565 GN=LRK10 PE=2 SV=1;	PF00069.27;PF07714.19;PF13947.8	Pkinase;PK_Tyr_Ser-Thr;GUB_WAK_bind	Protein kinase domain;Protein tyrosine and serine/threonine kinase;Wall-associated receptor kinase galacturonan-binding
TraesCS1B02G023400	0.145	1.16417	-3.00517	-	GO:000367	MF:DNA binding;	K09422	MYBP	------	------	COG5147	K:Transcription	KAF6987184.1	hypothetical protein CFC21_004848 [Triticum aestivum]	sp|P27898|MYBP_MAIZE;	Myb-related protein P OS=Zea mays OX=4577 GN=P PE=2 SV=1;	PF00249.33;PF06640.13;PF13921.8	Myb_DNA-binding;P_C;Myb_DNA-bind_6	Myb-like DNA-binding domain;P protein C-terminus;Myb-like DNA-binding domain
TraesCS1B02G023800	0.269167	1.14583	-2.08982	-	GO:0006508;GO:0019748;GO:0016747;GO:000418	BP:proteolysis;BP:secondary metabolic process;MF:transferase activity, transferring acyl groups other than amino-acyl groups;MF:serine-type carboxypeptidase activity;	K16296	SCPL-I	------	------	COG2939	E:Amino acid transport and metabolism	KAF6987186.1	hypothetical protein CFC21_004850 [Triticum aestivum]	sp|Q9C7Z9|SCP18_ARATH;	Serine carboxypeptidase-like 18 OS=Arabidopsis thaliana OX=3702 GN=SCPL18 PE=2 SV=2;	PF00450.24	Peptidase_S10	Serine carboxypeptidase
TraesCS1B02G024000	1.02	6.99167	-2.77707	-	GO:0016021;GO:0004497;GO:0016705;GO:0005506;GO:002003	CC:integral component of membrane;MF:monooxygenase activity;MF:oxidoreductase activity, acting on paired donors, with incorporation or reduction of molecular oxygen;MF:iron ion binding;MF:heme binding;	K09755	CYP84A, F5H	map00940	Phenylpropanoid biosynthesis	COG2124	Q:Secondary metabolites biosynthesis, transport and catabolism	KAF6987188.1	hypothetical protein CFC21_004852 [Triticum aestivum]	sp|Q42600|C84A1_ARATH;	Cytochrome P450 84A1 OS=Arabidopsis thaliana OX=3702 GN=CYP84A1 PE=1 SV=1;	PF00067.24	p450	Cytochrome P450
TraesCS1B02G029000	6.60833	31.8167	-2.26742	-	------	------	------	------	------	------	ENOG41105XW;ENOG41107DV	S:Function unknown;	KAF6987249.1	hypothetical protein CFC21_004909 [Triticum aestivum]	------	------	PF06830.13	Root_cap	Root cap
TraesCS1B02G032200	0.188333	0.920833	-2.28965	-	GO:001602	CC:integral component of membrane;	------	------	------	------	COG2801	L:Replication, recombination and repair	KAF6987281.1	hypothetical protein CFC21_004939 [Triticum aestivum]	------	------	------	------	------
TraesCS1B02G033000	0.193333	0.569167	-1.55776	-	GO:0005507;GO:001649	MF:copper ion binding;MF:oxidoreductase activity;	------	------	------	------	COG2132	Q:Secondary metabolites biosynthesis, transport and catabolism	KAF6987295.1	hypothetical protein CFC21_004951 [Triticum aestivum]	sp|Q5ZE07|LPR2_ORYSJ;	Multicopper oxidase LPR1 homolog 2 OS=Oryza sativa subsp. japonica OX=39947 GN=LPR2 PE=2 SV=1;	PF07731.16;PF07732.17;PF00394.24	Cu-oxidase_2;Cu-oxidase_3;Cu-oxidase	Multicopper oxidase;Multicopper oxidase;Multicopper oxidase
TraesCS1B02G034200	11.4208	1.36667	3.06293	-	GO:0009611;GO:000486	BP:response to wounding;MF:serine-type endopeptidase inhibitor activity;	------	------	------	------	ENOG411049I	S:Function unknown	XP_020186951.1	subtilisin-chymotrypsin inhibitor-2B [Aegilops tauschii subsp. strangulata]	sp|P16063|ICIB_HORVU;	Subtilisin-chymotrypsin inhibitor CI-1B OS=Hordeum vulgare OX=4513 PE=1 SV=1;	PF00280.20	potato_inhibit	Potato inhibitor I family
TraesCS1B02G034700	1.775	0.515833	1.78284	-	GO:0006952;GO:0005524;GO:004353	BP:defense response;MF:ATP binding;MF:ADP binding;	------	------	------	------	COG4886	S:Function unknown	KAF6987315.1	hypothetical protein CFC21_004970 [Triticum aestivum]	sp|F7J0N2|RGA5R_ORYSJ;	Disease resistance protein RGA5 OS=Oryza sativa subsp. japonica OX=39947 GN=RGA5 PE=1 SV=1;	PF00931.24;PF12799.9;PF13855.8	NB-ARC;LRR_4;LRR_8	NB-ARC domain;Leucine Rich repeats;Leucine rich repeat
TraesCS1B02G036000	9.29833	34.5525	-1.89375	Dirigent protein [Source:UniProtKB/TrEMBL;Acc:A0A1D5SL09]	GO:0048046;GO:003024	CC:apoplast;MF:carbohydrate binding;	------	------	------	------	ENOG410ZS5G	S:Function unknown	KAF6987326.1	hypothetical protein CFC21_004981 [Triticum aestivum]	------	------	PF03018.16	Dirigent	Dirigent-like protein
TraesCS1B02G040700	0.905	0.375833	1.26783	-	GO:001649	MF:oxidoreductase activity;	------	------	------	------	ENOG4111XIV	S:Function unknown	KAF6987373.1	hypothetical protein CFC21_005027 [Triticum aestivum]	------	------	PF03171.22	2OG-FeII_Oxy	2OG-F
TraesCS1B02G041500	1.02583	7.74167	-2.91585	-	GO:0045841;GO:000990	BP:negative regulation of mitotic metaphase/anaphase transition;BP:regulation of flower development;	------	------	------	------	ENOG4112CDX	S:Function unknown	KAF6987382.1	hypothetical protein CFC21_005036 [Triticum aestivum]	sp|Q9LGE3|FLP1_ORYSJ;	Flowering-promoting factor 1-like protein 1 OS=Oryza sativa subsp. japonica OX=39947 GN=RAA1 PE=1 SV=1;	------	------	------
TraesCS1B02G048300	17.4175	6.7275	1.3724	Phenylalanine ammonia-lyase [Source:UniProtKB/TrEMBL;Acc:W5A9M7]	GO:0006559;GO:0009800;GO:0005737;GO:0016841;GO:0003824;GO:004554	BP:L-phenylalanine catabolic process;BP:cinnamic acid biosynthetic process;CC:cytoplasm;MF:ammonia-lyase activity;MF:catalytic activity;MF:phenylalanine ammonia-lyase activity;	K10775	PAL	map00940;map00360	Phenylpropanoid biosynthesis;Phenylalanine metabolism	------	------	KAF6987456.1	hypothetical protein CFC21_005104 [Triticum aestivum]	sp|Q43210|PALY_WHEAT;	Phenylalanine ammonia-lyase OS=Triticum aestivum OX=4565 GN=PAL PE=3 SV=1;	PF00221.21	Lyase_aromatic	Aromatic amino acid lyase
TraesCS1B02G049700	0.155	0.835	-2.42951	-	GO:000367	MF:DNA binding;	K09422	MYBP	------	------	COG5147	K:Transcription	KAF6987476.1	hypothetical protein CFC21_005119 [Triticum aestivum]	sp|P27898|MYBP_MAIZE;	Myb-related protein P OS=Zea mays OX=4577 GN=P PE=2 SV=1;	PF00249.33;PF13921.8;PF06640.13	Myb_DNA-binding;Myb_DNA-bind_6;P_C	Myb-like DNA-binding domain;Myb-like DNA-binding domain;P protein C-terminus
TraesCS1B02G052600	0.181667	0.568333	-1.64544	-	GO:0046872;GO:001649	MF:metal ion binding;MF:oxidoreductase activity;	------	------	------	------	COG3491	S:Function unknown	KAF6987517.1	hypothetical protein CFC21_005152 [Triticum aestivum]	sp|Q40062|IDS3_HORVU;	2'-deoxymugineic-acid 2'-dioxygenase OS=Hordeum vulgare OX=4513 GN=IDS3 PE=1 SV=3;	PF03171.22;PF14226.8	2OG-FeII_Oxy;DIOX_N	2OG-F;non-haem dioxygenase in morphine synthesis N-terminal
TraesCS1B02G055600	3.42333	0.89	1.94352	-	------	------	------	------	------	------	ENOG410YJVG	S:Function unknown	KAF6987549.1	hypothetical protein CFC21_005181 [Triticum aestivum]	------	------	PF07795.13;PF13870.8;PF06818.17	DUF1635;DUF4201;Fez1	Protein of unknown function;Domain of unknown function;Fez1
TraesCS1B02G059000	11.9883	24.1742	-1.01184	-	GO:004573	MF:nutrient reservoir activity;	------	------	------	------	ENOG410YDMX	S:Function unknown	XP_037448884.1	legumin B-like [Triticum dicoccoides]	sp|Q6K508|GLUD1_ORYSJ;	Glutelin type-D 1 OS=Oryza sativa subsp. japonica OX=39947 GN=GLUD1 PE=2 SV=1;	PF00190.24;PF07883.13	Cupin_1;Cupin_2	Cupin;Cupin domain
TraesCS1B02G060200	3.07333	1.27583	1.26836	-	GO:0003352;GO:001602	BP:regulation of cilium movement;CC:integral component of membrane;	------	------	------	------	ENOG411019U	S:Function unknown	KAF6987597.1	hypothetical protein CFC21_005221 [Triticum aestivum]	sp|Q8BL95|CF298_MOUSE;	Cilia- and flagella-associated protein 298 OS=Mus musculus OX=10090 GN=Cfap298 PE=1 SV=1;	PF11069.10	CFAP298	Cilia- and flagella-associated protein 298
TraesCS1B02G062300	5.6225	1.82167	1.62595	-	GO:0006468;GO:0042742;GO:0002229;GO:0016021;GO:0005886;GO:0004672;GO:0030246;GO:0004675;GO:000552	BP:protein phosphorylation;BP:defense response to bacterium;BP:defense response to oomycetes;CC:integral component of membrane;CC:plasma membrane;MF:protein kinase activity;MF:carbohydrate binding;MF:transmembrane receptor protein serine/threonine kinase activity;MF:ATP binding;	------	------	------	------	COG0515	T:Signal transduction mechanisms	XP_037449371.1	L-type lectin-domain containing receptor kinase SIT2-like [Triticum dicoccoides]	sp|Q7XUN6|SIT2_ORYSJ;	L-type lectin-domain containing receptor kinase SIT2 OS=Oryza sativa subsp. japonica OX=39947 GN=SIT2 PE=2 SV=2;	PF00139.21;PF00069.27;PF07714.19	Lectin_legB;Pkinase;PK_Tyr_Ser-Thr	Legume lectin domain;Protein kinase domain;Protein tyrosine and serine/threonine kinase
TraesCS1B02G066000	0.34	1.295	-1.92935	-	GO:0016020;GO:0016021;GO:0042626;GO:000552	CC:membrane;CC:integral component of membrane;MF:ATPase activity, coupled to transmembrane movement of substances;MF:ATP binding;	------	------	------	------	COG1131	V:Defense mechanisms	KAF7050328.1	hypothetical protein CFC21_058714 [Triticum aestivum]	sp|Q8H8V7|AB5G_ORYSJ;	ABC transporter G family member 5 OS=Oryza sativa subsp. japonica OX=39947 GN=RCN1 PE=1 SV=1;	PF01061.26;PF00005.29;PF19055.2;PF13191.8;PF13555.8;PF12698.9;PF13481.8	ABC2_membrane;ABC_tran;ABC2_membrane_7;AAA_16;AAA_29;ABC2_membrane_3;AAA_25	ABC-2 type transporter;ABC transporter;ABC-2 type transporter;AAA ATPase domain;P-loop containing region of AAA domain;ABC-2 family transporter protein;AAA domain
TraesCS1B02G068100	0.0375	0.165	-2.1375	-	GO:000377	MF:actin binding;	------	------	------	------	ENOG410Y9Y9	S:Function unknown	KAF6987688.1	hypothetical protein CFC21_005310 [Triticum aestivum]	sp|P0DMS1|NET2A_ARATH;	Protein NETWORKED 2A OS=Arabidopsis thaliana OX=3702 GN=NET2A PE=2 SV=1;	PF07765.14	KIP1	KIP1-like protein
TraesCS1B02G072500	0.401667	1.27667	-1.66831	-	GO:0005975;GO:000455	BP:carbohydrate metabolic process;MF:hydrolase activity, hydrolyzing O-glycosyl compounds;	------	------	------	------	ENOG4111BDN	G:Carbohydrate transport and metabolism	KAF6987745.1	hypothetical protein CFC21_005362 [Triticum aestivum]	sp|Q8L868|E1311_ARATH;	Glucan endo-1,3-beta-glucosidase 11 OS=Arabidopsis thaliana OX=3702 GN=At1g32860 PE=2 SV=1;	PF00332.20	Glyco_hydro_17	Glycosyl hydrolases family 17
TraesCS1B02G073300	0.538333	1.16	-1.10755	-	------	------	------	------	------	------	ENOG410YAZM	S:Function unknown	KAF6987754.1	hypothetical protein CFC21_005368 [Triticum aestivum]	sp|Q5JKN2|ABIL2_ORYSJ;	Putative protein ABIL2 OS=Oryza sativa subsp. japonica OX=39947 GN=Os01g0551800 PE=2 SV=1;	------	------	------
TraesCS1B02G073500	5.18	10.5792	-1.0302	-	GO:001602	CC:integral component of membrane;	------	------	------	------	ENOG41104ZJ;ENOG411080I	S:Function unknown;	VAH13341.1	unnamed protein product [Triticum turgidum subsp. durum]	------	------	------	------	------
TraesCS1B02G080400	0.974167	0.0225	5.43617	Glycosyltransferase [Source:UniProtKB/TrEMBL;Acc:A0A341NWY7]	GO:000819	MF:UDP-glycosyltransferase activity;	------	------	------	------	COG1819	S:Function unknown	VAH13481.1	unnamed protein product [Triticum turgidum subsp. durum]	sp|Q9SJL0|U86A1_ARATH;	UDP-glycosyltransferase 86A1 OS=Arabidopsis thaliana OX=3702 GN=UGT86A1 PE=2 SV=1;	PF00201.20	UDPGT	UDP-glucoronosyl and UDP-glucosyl transferase
TraesCS1B02G084000	0.900833	2.11	-1.22791	-	------	------	------	------	------	------	ENOG410YYK6	S:Function unknown	KAF6993446.1	hypothetical protein CFC21_010338 [Triticum aestivum]	------	------	------	------	------
TraesCS1B02G088500	4.08333	1.65083	1.30655	-	GO:0006355;GO:0005634;GO:0003700;GO:004356	BP:regulation of transcription, DNA-templated;CC:nucleus;MF:transcription factor activity, sequence-specific DNA binding;MF:sequence-specific DNA binding;	------	------	------	------	ENOG410YYXY	K:Transcription	KAF6987938.1	hypothetical protein CFC21_005531 [Triticum aestivum]	sp|Q9SDW0|TGT3A_ARATH;	Trihelix transcription factor GT-3a OS=Arabidopsis thaliana OX=3702 GN=GT-3A PE=1 SV=1;	PF13837.8;PF13873.8;PF00249.33;PF10545.11	Myb_DNA-bind_4;Myb_DNA-bind_5;Myb_DNA-binding;MADF_DNA_bdg	Myb/SANT-like DNA-binding domain;Myb/SANT-like DNA-binding domain;Myb-like DNA-binding domain;Alcohol dehydrogenase transcription factor Myb/SANT-like
TraesCS1B02G088900	125.933	42.62	1.56305	-	GO:0006355;GO:0050896;GO:0005634;GO:0043565;GO:0003700;GO:000367	BP:regulation of transcription, DNA-templated;BP:response to stimulus;CC:nucleus;MF:sequence-specific DNA binding;MF:transcription factor activity, sequence-specific DNA binding;MF:DNA binding;	K13424	WRKY33	map04016;map04626	MAPK signaling pathway - plant;Plant-pathogen interaction	ENOG4112BTF	K:Transcription	ANJ45122.1	WRKY transcription factor, partial [Triticum aestivum]	sp|Q6IEQ7|WRK24_ORYSJ;	WRKY transcription factor WRKY24 OS=Oryza sativa subsp. japonica OX=39947 GN=WRKY24 PE=2 SV=1;	PF03106.17	WRKY	WRKY DNA -binding domain
TraesCS1B02G089600	1.84417	5.01583	-1.44352	-	------	------	------	------	------	------	ENOG410YDUZ	S:Function unknown	KAF6987949.1	hypothetical protein CFC21_005542 [Triticum aestivum]	------	------	PF04784.16;PF14389.8	DUF547;Lzipper-MIP1	Protein of unknown function, DUF547;Leucine-zipper of ternary complex factor MIP1
TraesCS1B02G094500	2.55417	0.9325	1.45368	-	GO:0006355;GO:0005634;GO:0003700;GO:0043565;GO:000367	BP:regulation of transcription, DNA-templated;CC:nucleus;MF:transcription factor activity, sequence-specific DNA binding;MF:sequence-specific DNA binding;MF:DNA binding;	K09422	MYBP	------	------	COG5147	K:Transcription	VAH13876.1	unnamed protein product [Triticum turgidum subsp. durum]	sp|Q10MB4|MYB2_ORYSJ;	Transcription factor MYB2 OS=Oryza sativa subsp. japonica OX=39947 GN=MYB2 PE=2 SV=1;	PF00249.33;PF13921.8	Myb_DNA-binding;Myb_DNA-bind_6	Myb-like DNA-binding domain;Myb-like DNA-binding domain
TraesCS1B02G096000	0.111667	1.56667	-3.81042	Peroxidase [Source:UniProtKB/TrEMBL;Acc:A0A1D5SNP0]	GO:0006979;GO:0042744;GO:0005576;GO:0009505;GO:0009506;GO:0020037;GO:0046872;GO:000460	BP:response to oxidative stress;BP:hydrogen peroxide catabolic process;CC:extracellular region;CC:plant-type cell wall;CC:plasmodesma;MF:heme binding;MF:metal ion binding;MF:peroxidase activity;	K00430	E1.11.1.7	map00940	Phenylpropanoid biosynthesis	ENOG41104H3	S:Function unknown	KAF6988022.1	hypothetical protein CFC21_005607 [Triticum aestivum]	sp|P22195|PER1_ARAHY;	Cationic peroxidase 1 OS=Arachis hypogaea OX=3818 GN=PNC1 PE=1 SV=2;	PF00141.25	peroxidase	Peroxidase
TraesCS1B02G098800	1.37417	4.7275	-1.78252	-	GO:001674	MF:transferase activity, transferring acyl groups other than amino-acyl groups;	------	------	------	------	ENOG410YE2Y	S:Function unknown	KAF6988050.1	hypothetical protein CFC21_005635 [Triticum aestivum]	sp|Q5JNT2|AT4_ORYSJ;	Acyl transferase 4 OS=Oryza sativa subsp. japonica OX=39947 GN=AT4 PE=1 SV=1;	PF02458.17	Transferase	Transferase family
TraesCS1B02G099800	5.4225	2.79917	0.953961	-	------	------	K19222	menI, DHNAT	map00130;map01240	Ubiquinone and other terpenoid-quinone biosynthesis;Biosynthesis of cofactors	COG2050	Q:Secondary metabolites biosynthesis, transport and catabolism	KAF6988058.1	hypothetical protein CFC21_005644 [Triticum aestivum]	sp|Q9SX65|DNAT1_ARATH;	1,4-dihydroxy-2-naphthoyl-CoA thioesterase 1 OS=Arabidopsis thaliana OX=3702 GN=DHNAT1 PE=1 SV=1;	PF03061.24	4HBT	Thioesterase superfamily
TraesCS1B02G100700	6.96833	1.6725	2.05881	-	------	------	------	------	------	------	ENOG41105C2	S:Function unknown	KAF6988070.1	hypothetical protein CFC21_005654 [Triticum aestivum]	------	------	------	------	------
TraesCS1B02G101900	7.165	0	#DIV/0!	-	------	------	------	------	------	------	ENOG41113UW	S:Function unknown	KAF6988087.1	hypothetical protein CFC21_005667 [Triticum aestivum]	------	------	------	------	------
TraesCS1B02G102000	21.9192	2.83167	2.95247	-	------	------	------	------	------	------	ENOG411069Q	S:Function unknown	KAF6988088.1	hypothetical protein CFC21_005668 [Triticum aestivum]	------	------	------	------	------
TraesCS1B02G102100	49.465	14.21	1.7995	-	------	------	------	------	------	------	ENOG41106GD;ENOG41105DU	S:Function unknown;	XP_037453814.1	uncharacterized protein LOC119324144 [Triticum dicoccoides]	------	------	------	------	------
TraesCS1B02G104200	5.14917	2.00667	1.35954	Phosphoglycerate kinase [Source:UniProtKB/TrEMBL;Acc:W5AAA5]	GO:0016310;GO:0006096;GO:0016301;GO:0000166;GO:0016740;GO:0004618;GO:000552	BP:phosphorylation;BP:glycolytic process;MF:kinase activity;MF:nucleotide binding;MF:transferase activity;MF:phosphoglycerate kinase activity;MF:ATP binding;	K00927	PGK, pgk	map00010;map00710	Glycolysis / Gluconeogenesis;Carbon fixation in photosynthetic organisms	COG0126	G:Carbohydrate transport and metabolism	XP_037454074.1	phosphoglycerate kinase, cytosolic-like [Triticum dicoccoides]	sp|P12783|PGKY_WHEAT;	Phosphoglycerate kinase, cytosolic OS=Triticum aestivum OX=4565 PE=2 SV=1;	PF00162.21	PGK	Phosphoglycerate kinase
TraesCS1B02G107300	8.02167	0.898333	3.15858	-	GO:001674	MF:transferase activity, transferring acyl groups other than amino-acyl groups;	------	------	------	------	ENOG410XPQ7	S:Function unknown	KAF6988141.1	hypothetical protein CFC21_005718 [Triticum aestivum]	sp|Q8LMI4|THT2_ORYSJ;	Tryptamine hydroxycinnamoyltransferase 2 OS=Oryza sativa subsp. japonica OX=39947 GN=THT2 PE=1 SV=1;	PF02458.17	Transferase	Transferase family
TraesCS1B02G107400	9.95	3.0475	1.70707	-	GO:001674	MF:transferase activity, transferring acyl groups other than amino-acyl groups;	------	------	------	------	ENOG410XPQ7	S:Function unknown	KAF6988149.1	hypothetical protein CFC21_005722 [Triticum aestivum]	sp|Q8LMI4|THT2_ORYSJ;	Tryptamine hydroxycinnamoyltransferase 2 OS=Oryza sativa subsp. japonica OX=39947 GN=THT2 PE=1 SV=1;	PF02458.17	Transferase	Transferase family
TraesCS1B02G108500	8.07333	3.87917	1.05742	-	GO:0006952;GO:0016705;GO:0005524;GO:004353	BP:defense response;MF:oxidoreductase activity, acting on paired donors, with incorporation or reduction of molecular oxygen;MF:ATP binding;MF:ADP binding;	------	------	------	------	------	------	VAH14296.1	unnamed protein product [Triticum turgidum subsp. durum]	sp|Q2R8L1|RGA5S_ORYSJ;	Disease resistance protein RGA5 OS=Oryza sativa subsp. japonica OX=39947 GN=RGA5 PE=2 SV=1;	PF00931.24;PF18052.3;PF13173.8;PF13401.8	NB-ARC;Rx_N;AAA_14;AAA_22	NB-ARC domain;Rx N-terminal domain;AAA domain;AAA domain
TraesCS1B02G110600	4.51	1.71417	1.39562	-	GO:0006468;GO:0048544;GO:0016021;GO:0005524;GO:0004672;GO:0106310;GO:010631	BP:protein phosphorylation;BP:recognition of pollen;CC:integral component of membrane;MF:ATP binding;MF:protein kinase activity;MF:old GO;MF:old GO;	------	------	------	------	ENOG410YEQP	T:Signal transduction mechanisms	VAH14351.1	unnamed protein product [Triticum turgidum subsp. durum]	sp|Q39086|SD17_ARATH;	Receptor-like serine/threonine-protein kinase SD1-7 OS=Arabidopsis thaliana OX=3702 GN=SD17 PE=1 SV=1;	PF00069.27;PF07714.19;PF08276.13;PF17667.3	Pkinase;PK_Tyr_Ser-Thr;PAN_2;Pkinase_fungal	Protein kinase domain;Protein tyrosine and serine/threonine kinase;PAN-like domain;Fungal protein kinase
TraesCS1B02G111400	3.27583	8.945	-1.44922	-	GO:001678	MF:hydrolase activity;	------	------	------	------	COG0412	Q:Secondary metabolites biosynthesis, transport and catabolism	VAH14357.1	unnamed protein product [Triticum turgidum subsp. durum]	sp|Q9ZT66|E134_MAIZE;	Endo-1,3;1,4-beta-D-glucanase OS=Zea mays OX=4577 PE=1 SV=1;	PF01738.20	DLH	Dienelactone hydrolase family
TraesCS1B02G113100	0.148333	0.0275	2.43134	-	GO:004698	MF:protein dimerization activity;	------	------	------	------	ENOG4111SJN	K:Transcription	KAF6988214.1	hypothetical protein CFC21_005783 [Triticum aestivum]	sp|A0A2R6QE26|BHL42_ACTCC;	Transcription factor BHLH42 OS=Actinidia chinensis var. chinensis OX=1590841 GN=BHLH42 PE=1 SV=1;	PF14215.8;PF00010.28	bHLH-MYC_N;HLH	bHLH-MYC and R2R3-MYB transcription factors N-terminal;Helix-loop-helix DNA-binding domain
TraesCS1B02G115000	2.00083	0.318333	2.65199	Peroxidase [Source:UniProtKB/TrEMBL;Acc:A0A341NYQ7]	GO:0006979;GO:0042744;GO:0005576;GO:0020037;GO:0046872;GO:000460	BP:response to oxidative stress;BP:hydrogen peroxide catabolic process;CC:extracellular region;MF:heme binding;MF:metal ion binding;MF:peroxidase activity;	K00430	E1.11.1.7	map00940	Phenylpropanoid biosynthesis	ENOG410YC4V	G:Carbohydrate transport and metabolism	VAH14436.1	unnamed protein product [Triticum turgidum subsp. durum]	sp|Q42517|PERN_ARMRU;	Peroxidase N OS=Armoracia rusticana OX=3704 GN=HRPN PE=2 SV=1;	PF00141.25	peroxidase	Peroxidase
TraesCS1B02G120000	12.5667	5.49917	1.19232	-	------	------	------	------	------	------	ENOG410YBG3	S:Function unknown	KAF6988294.1	hypothetical protein CFC21_005857 [Triticum aestivum]	sp|P50699|TLPH_ARATH;	Thaumatin-like protein OS=Arabidopsis thaliana OX=3702 GN=At1g18250 PE=2 SV=2;	PF00314.19	Thaumatin	Thaumatin family
TraesCS1B02G122800	57.9142	26.2775	1.14009	Phenylalanine ammonia-lyase [Source:UniProtKB/TrEMBL;Acc:W5A9P3]	GO:0006559;GO:0009800;GO:0005737;GO:0016841;GO:0003824;GO:004554	BP:L-phenylalanine catabolic process;BP:cinnamic acid biosynthetic process;CC:cytoplasm;MF:ammonia-lyase activity;MF:catalytic activity;MF:phenylalanine ammonia-lyase activity;	K10775	PAL	map00940;map00360	Phenylpropanoid biosynthesis;Phenylalanine metabolism	COG2986	E:Amino acid transport and metabolism	KAF6988332.1	hypothetical protein CFC21_005889 [Triticum aestivum]	sp|Q43210|PALY_WHEAT;	Phenylalanine ammonia-lyase OS=Triticum aestivum OX=4565 GN=PAL PE=3 SV=1;	PF00221.21	Lyase_aromatic	Aromatic amino acid lyase
TraesCS1B02G123500	0.7325	0.1725	2.08623	Similar to OsGA2ox1 [Source: Projected from Oryza sativa (Os05g0158600)]	GO:0009416;GO:0045487;GO:0052634;GO:0051213;GO:0046872;GO:001649	BP:response to light stimulus;BP:gibberellin catabolic process;MF:C-19 gibberellin 2-beta-dioxygenase activity;MF:dioxygenase activity;MF:metal ion binding;MF:oxidoreductase activity;	K04125	GA2ox	map00904	Diterpenoid biosynthesis	COG3491	S:Function unknown	XP_037456363.1	gibberellin 2-beta-dioxygenase 1-like [Triticum dicoccoides]	sp|Q5W726|G2OX1_ORYSJ;	Gibberellin 2-beta-dioxygenase 1 OS=Oryza sativa subsp. japonica OX=39947 GN=GA2OX1 PE=1 SV=1;	PF03171.22;PF14226.8	2OG-FeII_Oxy;DIOX_N	2OG-F;non-haem dioxygenase in morphine synthesis N-terminal
TraesCS1B02G123900	1.00667	0.208333	2.27262	-	GO:0006415;GO:0000054;GO:0006413;GO:0051536;GO:0005506;GO:0046872;GO:0043024;GO:000552	BP:translational termination;BP:ribosomal subunit export from nucleus;BP:translational initiation;MF:iron-sulfur cluster binding;MF:iron ion binding;MF:metal ion binding;MF:ribosomal small subunit binding;MF:ATP binding;	------	------	------	------	COG1142	C:Energy production and conversion	XP_037456345.1	uncharacterized protein LOC119327288 isoform X1 [Triticum dicoccoides]	------	------	PF12617.10;PF13484.8;PF12837.9;PF13187.8;PF12838.9;PF13237.8;PF00037.29;PF12797.9	LdpA_C;Fer4_16;Fer4_6;Fer4_9;Fer4_7;Fer4_10;Fer4;Fer4_2	Iron-Sulfur binding protein C terminal;4Fe-4S double cluster binding domain;4Fe-4S binding domain;4Fe-4S dicluster domain;4Fe-4S dicluster domain;4Fe-4S dicluster domain;4Fe-4S binding domain;4Fe-4S binding domain
TraesCS1B02G127300	0.215833	0.015	3.84688	-	GO:004687	MF:metal ion binding;	------	------	------	------	ENOG41105Z1	S:Function unknown	KAF6988403.1	hypothetical protein CFC21_005948 [Triticum aestivum]	------	------	PF00628.31	PHD	PHD-finger
TraesCS1B02G127900	5.60833	2.61917	1.09846	-	GO:0019538;GO:0006508;GO:0005737;GO:0004177;GO:0030145;GO:0070006;GO:000823	BP:protein metabolic process;BP:proteolysis;CC:cytoplasm;MF:aminopeptidase activity;MF:manganese ion binding;MF:metalloaminopeptidase activity;MF:metalloexopeptidase activity;	K01255	CARP, pepA	map00480	Glutathione metabolism	COG0260	E:Amino acid transport and metabolism	KAF6988418.1	hypothetical protein CFC21_005954 [Triticum aestivum]	sp|Q6K669|AMPL2_ORYSJ;	Leucine aminopeptidase 2, chloroplastic OS=Oryza sativa subsp. japonica OX=39947 GN=Os02g0794700 PE=2 SV=1;	PF00883.23;PF02789.19	Peptidase_M17;Peptidase_M17_N	Cytosol aminopeptidase family, catalytic domain;Cytosol aminopeptidase family, N-terminal domain
TraesCS1B02G129200	2.24	0.241667	3.21241	-	GO:004698	MF:protein dimerization activity;	------	------	------	------	ENOG410ZM5C;ENOG41107EQ;ENOG41118XT	K:Transcription;S:Function unknown;S:Function unknown	XP_037436615.1	transcription factor AIG1-like [Triticum dicoccoides]	sp|Q9XEF0|BH051_ARATH;	Transcription factor bHLH51 OS=Arabidopsis thaliana OX=3702 GN=BHLH51 PE=2 SV=1;	PF00010.28	HLH	Helix-loop-helix DNA-binding domain
TraesCS1B02G129800	6.25167	1.44333	2.11484	-	GO:0005634;GO:000367	CC:nucleus;MF:DNA binding;	------	------	------	------	COG5269	K:Transcription	KAF6988447.1	hypothetical protein CFC21_005979 [Triticum aestivum]	sp|Q8H0W3|RVE6_ARATH;	Protein REVEILLE 6 OS=Arabidopsis thaliana OX=3702 GN=RVE6 PE=2 SV=1;	PF00249.33;PF15963.7	Myb_DNA-binding;Myb_DNA-bind_7	Myb-like DNA-binding domain;Myb DNA-binding like
TraesCS1B02G130300	3.97083	1.77917	1.15824	-	GO:0006468;GO:0046777;GO:0016021;GO:0005886;GO:0009506;GO:0004674;GO:0004672;GO:000552	BP:protein phosphorylation;BP:protein autophosphorylation;CC:integral component of membrane;CC:plasma membrane;CC:plasmodesma;MF:protein serine/threonine kinase activity;MF:protein kinase activity;MF:ATP binding;	------	------	------	------	COG0515	T:Signal transduction mechanisms	VAH14922.1	unnamed protein product [Triticum turgidum subsp. durum]	sp|Q9LX66|HERK_ARATH;	Receptor-like protein kinase HERK 1 OS=Arabidopsis thaliana OX=3702 GN=HERK1 PE=1 SV=1;	PF07714.19;PF00069.27;PF12819.9;PF11721.10;PF03109.18	PK_Tyr_Ser-Thr;Pkinase;Malectin_like;Malectin;ABC1	Protein tyrosine and serine/threonine kinase;Protein kinase domain;Malectin-like domain;Malectin domain;ABC1 atypical kinase-like domain
TraesCS1B02G132500	1.30917	0.255833	2.35537	-	GO:0005774;GO:000377	CC:vacuolar membrane;MF:actin binding;	------	------	------	------	ENOG410YMAJ;ENOG4111W2T	S:Function unknown;	KAF6988480.1	LOW QUALITY PROTEIN: hypothetical protein CFC21_006006 [Triticum aestivum]	sp|F4KEW8|NET4A_ARATH;	Protein NETWORKED 4A OS=Arabidopsis thaliana OX=3702 GN=NET4A PE=2 SV=1;	PF07765.14;PF19220.2;PF17082.7;PF10473.11	KIP1;Crescentin;Spc29;CENP-F_leu_zip	KIP1-like protein;Crescentin protein;Spindle Pole Component 29;Leucine-rich repeats of kinetochore protein Cenp-F/LEK1
TraesCS1B02G137100	0.581667	0.255	1.1897	-	GO:0034968;GO:0016571;GO:0005634;GO:0005694;GO:0018024;GO:0008270;GO:000551	BP:histone lysine methylation;BP:histone methylation;CC:nucleus;CC:chromosome;MF:histone-lysine N-methyltransferase activity;MF:zinc ion binding;MF:protein binding;	K11420	EHMT	map00310	Lysine degradation	COG2940	S:Function unknown	XP_037474100.1	uncharacterized protein LOC119350297 [Triticum dicoccoides]	sp|O82175|SUVH5_ARATH;	Histone-lysine N-methyltransferase, H3 lysine-9 specific SUVH5 OS=Arabidopsis thaliana OX=3702 GN=SUVH5 PE=1 SV=1;	PF02182.19;PF00856.30;PF05033.18	SAD_SRA;SET;Pre-SET	SAD/SRA domain;SET domain;Pre-SET motif
TraesCS1B02G137200	40.48	113.451	-1.48679	-	------	------	------	------	------	------	ENOG410ZUQD;ENOG410Z2Q7	S:Function unknown;	XP_037457354.1	uncharacterized protein LOC119328474 [Triticum dicoccoides]	------	------	------	------	------
TraesCS1B02G139500	60.7258	11.9192	2.34903	-	GO:0016887;GO:000552	MF:ATPase activity;MF:ATP binding;	K09489	HSPA4	------	------	COG0443	O:Posttranslational modification, protein turnover, chaperones	KAF6988566.1	hypothetical protein CFC21_006082 [Triticum aestivum]	sp|Q9S7C0|HSP7O_ARATH;	Heat shock 70 kDa protein 14 OS=Arabidopsis thaliana OX=3702 GN=HSP70-14 PE=1 SV=1;	PF00012.22;PF06723.15	HSP70;MreB_Mbl	Hsp70 protein;MreB/Mbl protein
TraesCS1B02G143200	0.918333	2.25667	-1.2971	-	GO:0009639;GO:000995	BP:response to red or far red light;BP:negative gravitropism;	------	------	------	------	ENOG410YB2T	S:Function unknown	KAF6988627.1	hypothetical protein CFC21_006122 [Triticum aestivum]	sp|F4KGE8|GIL1_ARATH;	Protein GRAVITROPIC IN THE LIGHT 1 OS=Arabidopsis thaliana OX=3702 GN=GIL1 PE=1 SV=1;	PF04859.14	DUF641	Plant protein of unknown function
TraesCS1B02G151300	31.5158	8.95333	1.81558	-	GO:0006457;GO:0009507;GO:0051082;GO:0016887;GO:000552	BP:protein folding;CC:chloroplast;MF:unfolded protein binding;MF:ATPase activity;MF:ATP binding;	K03283	HSPA1s	map04144;map04141;map03040	Endocytosis;Protein processing in endoplasmic reticulum;Spliceosome	COG0443	O:Posttranslational modification, protein turnover, chaperones	KAF6988728.1	hypothetical protein CFC21_006200 [Triticum aestivum]	sp|Q02028|HSP7S_PEA;	Stromal 70 kDa heat shock-related protein, chloroplastic OS=Pisum sativum OX=3888 GN=HSP70 PE=2 SV=1;	PF00012.22;PF06723.15	HSP70;MreB_Mbl	Hsp70 protein;MreB/Mbl protein
TraesCS1B02G157000	99.3325	29.7633	1.73873	Heavy metal-associated protein [Source:UniProtKB/TrEMBL;Acc:S5TTF6]	GO:0030001;GO:004687	BP:metal ion transport;MF:metal ion binding;	------	------	------	------	COG2608	S:Function unknown	AGS38338.1	putative stripe rust resistance protein [Triticum aestivum]	sp|Q9LZF1|HIP6_ARATH;	Heavy metal-associated isoprenylated plant protein 6 OS=Arabidopsis thaliana OX=3702 GN=HIPP06 PE=1 SV=1;	PF00403.28	HMA	Heavy-metal-associated domain
TraesCS1B02G159400	0.195833	0.5975	-1.60931	-	GO:0055085;GO:001602	BP:transmembrane transport;CC:integral component of membrane;	------	------	------	------	COG1055	P:Inorganic ion transport and metabolism	XP_037461214.1	silicon efflux transporter LSI2-like [Triticum dicoccoides]	sp|Q10SY9|LSI2_ORYSJ;	Silicon efflux transporter LSI2 OS=Oryza sativa subsp. japonica OX=39947 GN=LSI2 PE=1 SV=1;	PF03600.18;PF02040.17	CitMHS;ArsB	Citrate transporter;Arsenical pump membrane protein
TraesCS1B02G162000	2.48917	1.32583	0.908764	-	GO:000551	MF:protein binding;	------	------	------	------	ENOG410XXR9	S:Function unknown	KAF6988893.1	hypothetical protein CFC21_006321 [Triticum aestivum]	------	------	PF12937.9	F-box-like	F-box-like
TraesCS1B02G162400	1.605	0.245	2.71172	-	GO:0006423;GO:0006418;GO:0004812;GO:0004817;GO:0000166;GO:0046872;GO:000552	BP:cysteinyl-tRNA aminoacylation;BP:tRNA aminoacylation for protein translation;MF:aminoacyl-tRNA ligase activity;MF:cysteine-tRNA ligase activity;MF:nucleotide binding;MF:metal ion binding;MF:ATP binding;	K01883	CARS, cysS	map00970	Aminoacyl-tRNA biosynthesis	COG0215	J:Translation, ribosomal structure and biogenesis	KAF6988899.1	hypothetical protein CFC21_006325 [Triticum aestivum]	sp|A0A1D6LAG9|CPS1_MAIZE;	Cysteine--tRNA ligase CPS1, chloroplastic/mitochondrial OS=Zea mays OX=4577 GN=CPS1 PE=2 SV=1;	PF01406.21;PF09334.13;PF00133.24	tRNA-synt_1e;tRNA-synt_1g;tRNA-synt_1	tRNA synthetases class I;tRNA synthetases class I;tRNA synthetases class I
TraesCS1B02G178500	25.865	4.4825	2.52863	-	GO:0006334;GO:0000398;GO:0008380;GO:0006397;GO:0046540;GO:0016021;GO:0005634;GO:0005682;GO:000568	BP:nucleosome assembly;BP:mRNA splicing, via spliceosome;BP:RNA splicing;BP:mRNA processing;CC:U4/U6 x U5 tri-snRNP complex;CC:integral component of membrane;CC:nucleus;CC:U5 snRNP;CC:spliceosomal complex;	K12859	TXNL4A, DIB1	map03040	Spliceosome	ENOG4111FE6	S:Function unknown	VAH16547.1	unnamed protein product [Triticum turgidum subsp. durum]	sp|Q9FE62|YLS8_ARATH;	Thioredoxin-like protein YLS8 OS=Arabidopsis thaliana OX=3702 GN=YLS8 PE=1 SV=1;	PF02966.18;PF00085.22	DIM1;Thioredoxin	Mitosis protein DIM1;Thioredoxin
TraesCS1B02G182200	5.14333	0.761667	2.75547	-	GO:0055085;GO:0016021;GO:0016020;GO:0005774;GO:0032586;GO:0015250;GO:001526	BP:transmembrane transport;CC:integral component of membrane;CC:membrane;CC:vacuolar membrane;CC:protein storage vacuole membrane;MF:water channel activity;MF:channel activity;	K09873	TIP	------	------	COG0580	G:Carbohydrate transport and metabolism	KAF6989162.1	hypothetical protein CFC21_006527 [Triticum aestivum]	sp|Q9FWV6|TIP31_ORYSJ;	Probable aquaporin TIP3-1 OS=Oryza sativa subsp. japonica OX=39947 GN=TIP3-1 PE=2 SV=1;	PF00230.22	MIP	Major intrinsic protein
TraesCS1B02G184500	6.2675	13.2742	-1.08266	Carboxypeptidase [Source:UniProtKB/TrEMBL;Acc:W5A7D8]	GO:0006508;GO:000418	BP:proteolysis;MF:serine-type carboxypeptidase activity;	K09646	SCPEP1	------	------	COG2939	E:Amino acid transport and metabolism	XP_037462960.1	serine carboxypeptidase-like 51 isoform X1 [Triticum dicoccoides]	sp|Q67Y83|SCP51_ARATH;	Serine carboxypeptidase-like 51 OS=Arabidopsis thaliana OX=3702 GN=SCPL51 PE=2 SV=2;	PF00450.24	Peptidase_S10	Serine carboxypeptidase
TraesCS1B02G189700	3.84167	8.47167	-1.14091	-	------	------	------	------	------	------	ENOG410YCMD	S:Function unknown	KAF6989252.1	hypothetical protein CFC21_006606 [Triticum aestivum]	------	------	PF10358.11;PF08614.13	NT-C2;ATG16	N-terminal C2 in EEIG1 and EHBP1 proteins;Autophagy protein 16
TraesCS1B02G193300	1.19167	0.4175	1.51313	-	GO:0045892;GO:000563	BP:negative regulation of transcription, DNA-templated;CC:nucleus;	------	------	------	------	ENOG410YV5M	S:Function unknown	XP_037437757.1	transcription repressor OFP8-like [Triticum dicoccoides]	sp|Q94CV1|OFP8_ORYSJ;	Transcription repressor OFP8 OS=Oryza sativa subsp. japonica OX=39947 GN=OFP8 PE=1 SV=1;	PF04844.15	Ovate	Transcriptional repressor, ovate
TraesCS1B02G195600	2.7425	1.15	1.25386	-	------	------	------	------	------	------	ENOG411074S;ENOG410YWPQ	S:Function unknown;	XP_037463924.1	uncharacterized protein LOC119335979 [Triticum dicoccoides]	------	------	------	------	------
TraesCS1B02G197000	25.9567	11.9458	1.1196	-	------	------	------	------	------	------	ENOG4111QDI	S:Function unknown	XP_037464088.1	uncharacterized protein LOC119336175 [Triticum dicoccoides]	------	------	PF12697.9;PF00561.22;PF12146.10	Abhydrolase_6;Abhydrolase_1;Hydrolase_4	Alpha/beta hydrolase family;alpha/beta hydrolase fold;Serine aminopeptidase, S33
TraesCS1B02G197600	1.31417	2.7025	-1.04015	Actin-depolymerizing factor 6 [Source:Projected from Arabidopsis thaliana (AT2G31200) UniProtKB/Swiss-Prot;Acc:Q9ZSK2]	GO:0030042;GO:0005737;GO:0015629;GO:0003779;GO:005101	BP:actin filament depolymerization;CC:cytoplasm;CC:actin cytoskeleton;MF:actin binding;MF:actin filament binding;	K05765	CFL	------	------	ENOG41122P5	S:Function unknown	XP_020147190.2	actin-depolymerizing factor 10 [Aegilops tauschii subsp. strangulata]	sp|Q337A5|ADF10_ORYSJ;	Actin-depolymerizing factor 10 OS=Oryza sativa subsp. japonica OX=39947 GN=ADF10 PE=2 SV=1;	PF00241.22	Cofilin_ADF	Cofilin/tropomyosin-type actin-binding protein
TraesCS1B02G198700	11.8008	5.57417	1.08206	-	GO:0016021;GO:0016887;GO:000552	CC:integral component of membrane;MF:ATPase activity;MF:ATP binding;	------	------	------	------	COG0465	O:Posttranslational modification, protein turnover, chaperones	KAF6989363.1	hypothetical protein CFC21_006702 [Triticum aestivum]	sp|F4IJ77|AATP4_ARATH;	AAA-ATPase At2g46620 OS=Arabidopsis thaliana OX=3702 GN=At2g46620 PE=2 SV=1;	PF00004.31;PF14363.8;PF13479.8	AAA;AAA_assoc;AAA_24	ATPase family associated with various cellular activities;Domain associated at C-terminal with AAA;AAA domain
TraesCS1B02G199900	12.515	31.9783	-1.35344	-	------	------	------	------	------	------	ENOG41104TQ	S:Function unknown	KAF6989376.1	hypothetical protein CFC21_006719 [Triticum aestivum]	------	------	------	------	------
TraesCS1B02G203000	20.2217	10.1658	0.992173	-	GO:0016021;GO:0004497;GO:0016705;GO:0005506;GO:002003	CC:integral component of membrane;MF:monooxygenase activity;MF:oxidoreductase activity, acting on paired donors, with incorporation or reduction of molecular oxygen;MF:iron ion binding;MF:heme binding;	K24184	CYP89A	------	------	COG2124	Q:Secondary metabolites biosynthesis, transport and catabolism	XP_037464827.1	cytochrome P450 89A2-like isoform X1 [Triticum dicoccoides]	sp|Q42602|C89A2_ARATH;	Cytochrome P450 89A2 OS=Arabidopsis thaliana OX=3702 GN=CYP89A2 PE=2 SV=2;	PF00067.24	p450	Cytochrome P450
TraesCS1B02G203200	0.786667	2.15417	-1.45331	-	GO:0006468;GO:0005886;GO:0004674;GO:0005524;GO:000467	BP:protein phosphorylation;CC:plasma membrane;MF:protein serine/threonine kinase activity;MF:ATP binding;MF:protein kinase activity;	------	------	------	------	COG0515	T:Signal transduction mechanisms	KAF6989407.1	hypothetical protein CFC21_006745 [Triticum aestivum]	sp|A2XW02|STRK1_ORYSI;	Salt tolerance receptor-like cytoplasmic kinase 1 OS=Oryza sativa subsp. indica OX=39946 GN=OsI_16820 PE=2 SV=1;	PF00069.27;PF07714.19	Pkinase;PK_Tyr_Ser-Thr	Protein kinase domain;Protein tyrosine and serine/threonine kinase
TraesCS1B02G204100	2.73167	6.74917	-1.30493	-	GO:0046658;GO:0016021;GO:0005507;GO:001649	CC:anchored component of plasma membrane;CC:integral component of membrane;MF:copper ion binding;MF:oxidoreductase activity;	------	------	------	------	COG2132	Q:Secondary metabolites biosynthesis, transport and catabolism	XP_037464932.1	monocopper oxidase-like protein SKU5 [Triticum dicoccoides]	sp|Q9SU40|SKU5_ARATH;	Monocopper oxidase-like protein SKU5 OS=Arabidopsis thaliana OX=3702 GN=SKU5 PE=1 SV=1;	PF00394.24;PF07732.17;PF07731.16	Cu-oxidase;Cu-oxidase_3;Cu-oxidase_2	Multicopper oxidase;Multicopper oxidase;Multicopper oxidase
TraesCS1B02G204700	1.08583	0.520833	1.05991	-	GO:0006438;GO:0006418;GO:0005737;GO:0004812;GO:0004823;GO:0000166;GO:0002161;GO:0004832;GO:000552	BP:valyl-tRNA aminoacylation;BP:tRNA aminoacylation for protein translation;CC:cytoplasm;MF:aminoacyl-tRNA ligase activity;MF:leucine-tRNA ligase activity;MF:nucleotide binding;MF:aminoacyl-tRNA editing activity;MF:valine-tRNA ligase activity;MF:ATP binding;	K01873	VARS, valS	map00970	Aminoacyl-tRNA biosynthesis	COG0525	J:Translation, ribosomal structure and biogenesis	KAF6989423.1	hypothetical protein CFC21_006759 [Triticum aestivum]	sp|P93736|SYVM1_ARATH;	Valine--tRNA ligase, mitochondrial 1 OS=Arabidopsis thaliana OX=3702 GN=TWN2 PE=1 SV=2;	PF00133.24;PF08264.15;PF09334.13;PF13603.8;PF10458.11	tRNA-synt_1;Anticodon_1;tRNA-synt_1g;tRNA-synt_1_2;Val_tRNA-synt_C	tRNA synthetases class I;Anticodon-binding domain of tRNA ligase;tRNA synthetases class I;Leucyl-tRNA synthetase, Domain 2;Valyl tRNA synthetase tRNA binding arm
TraesCS1B02G205800	9.345	4.59333	1.02465	-	GO:0009416;GO:000551	BP:response to light stimulus;MF:protein binding;	------	------	------	------	COG4886	S:Function unknown	XP_037465162.1	plant intracellular Ras-group-related LRR protein 5-like [Triticum dicoccoides]	sp|Q8S7M7|PIRL5_ORYSJ;	Plant intracellular Ras-group-related LRR protein 5 OS=Oryza sativa subsp. japonica OX=39947 GN=IRL5 PE=2 SV=1;	PF13855.8;PF12799.9	LRR_8;LRR_4	Leucine rich repeat;Leucine Rich repeats
TraesCS1B02G209500	0.099167	0.33	-1.73453	-	------	------	------	------	------	------	ENOG41104S6	S:Function unknown	KAF6989467.1	hypothetical protein CFC21_006801 [Triticum aestivum]	sp|F4JJP1|Y4759_ARATH;	WEB family protein At4g27595, chloroplastic OS=Arabidopsis thaliana OX=3702 GN=At4g27595 PE=2 SV=1;	------	------	------
TraesCS1B02G210700	0.191667	0.869167	-2.18103	Glycosyltransferase family 2 (GT2) protein, Root hair morphogenesi [Source: Projected from Oryza sativa (Os10g0578200)]	GO:0009833;GO:0030244;GO:0016021;GO:0016020;GO:0005886;GO:0005802;GO:0051753;GO:001676	BP:plant-type primary cell wall biogenesis;BP:cellulose biosynthetic process;CC:integral component of membrane;CC:membrane;CC:plasma membrane;CC:trans-Golgi network;MF:mannan synthase activity;MF:cellulose synthas;	K20924	CSLD	------	------	COG1215	M:Cell wall/membrane/envelope biogenesis	KAF6989484.1	hypothetical protein CFC21_006816 [Triticum aestivum]	sp|A2ZAK8|CSLD1_ORYSI;	Cellulose synthase-like protein D1 OS=Oryza sativa subsp. indica OX=39946 GN=CSLD1 PE=3 SV=2;	PF03552.16;PF14570.8;PF13632.8;PF00535.28	Cellulose_synt;zf-RING_4;Glyco_trans_2_3;Glycos_transf_2	Cellulose synthase;RING/Ubox like zinc-binding domain;Glycosyl transferase family group 2;Glycosyl transferase family 2
TraesCS1B02G211700	0.811667	0.116667	2.79849	Cytochrome P450, family 722, subfamily A, polypeptide 1 [Source:Projected from Arabidopsis thaliana (AT1G19630) UniProtKB/TrEMBL;Acc:F4HP86]	GO:0010268;GO:0016132;GO:0016125;GO:0007275;GO:0016021;GO:0004497;GO:0020037;GO:0016705;GO:0005506;GO:001649	BP:brassinosteroid homeostasis;BP:brassinosteroid biosynthetic process;BP:sterol metabolic process;BP:multicellular organism development;CC:integral component of membrane;MF:monooxygenase activity;MF:heme binding;MF:oxidoreductase activity, acting on paired donors, with incorporation or reduction of molecular oxygen;MF:iron ion binding;MF:oxidoreductase activity;	------	------	------	------	COG2124	Q:Secondary metabolites biosynthesis, transport and catabolism	VAH17588.1	unnamed protein product [Triticum turgidum subsp. durum]	sp|Q8GSQ1|C85A1_ORYSJ;	Cytochrome P450 85A1 OS=Oryza sativa subsp. japonica OX=39947 GN=CYP85A1 PE=1 SV=1;	PF00067.24	p450	Cytochrome P450
TraesCS1B02G213100	1.23333	3.09583	-1.32777	-	GO:0071918;GO:0055085;GO:0016020;GO:0005886;GO:0016021;GO:0015293;GO:0015204;GO:002285	BP:urea transmembrane transport;BP:transmembrane transport;CC:membrane;CC:plasma membrane;CC:integral component of membrane;MF:symporter activity;MF:urea transmembrane transporter activity;MF:transmembrane transporter activity;	K20989	DUR3	------	------	COG0591	E:Amino acid transport and metabolism	XP_037466090.1	urea-proton symporter DUR3-like [Triticum dicoccoides]	sp|Q7XBS0|DUR3_ORYSJ;	Urea-proton symporter DUR3 OS=Oryza sativa subsp. japonica OX=39947 GN=DUR3 PE=1 SV=1;	PF00474.19	SSF	Sodiu
TraesCS1B02G213600	12.065	5.32	1.18133	-	GO:0032259;GO:0016021;GO:000816	BP:methylation;CC:integral component of membrane;MF:methyltransferase activity;	------	------	------	------	ENOG4111CGI	S:Function unknown	KAF7082211.1	hypothetical protein CFC21_086089 [Triticum aestivum]	sp|Q94II3|PMTL_ARATH;	Probable methyltransferase PMT21 OS=Arabidopsis thaliana OX=3702 GN=ERD3 PE=2 SV=1;	PF03141.18;PF08241.14;PF13649.8	Methyltransf_29;Methyltransf_11;Methyltransf_25	Putative S-adenosyl-L-methionine-dependent methyltransferase;Methyltransferase domain;Methyltransferase domain
TraesCS1B02G214800	0.160833	1.18917	-2.88632	Peroxidase [Source:UniProtKB/TrEMBL;Acc:A0A1D5S7A9]	GO:0006979;GO:0042744;GO:0005576;GO:0009505;GO:0009506;GO:0020037;GO:0046872;GO:000460	BP:response to oxidative stress;BP:hydrogen peroxide catabolic process;CC:extracellular region;CC:plant-type cell wall;CC:plasmodesma;MF:heme binding;MF:metal ion binding;MF:peroxidase activity;	K00430	E1.11.1.7	map00940	Phenylpropanoid biosynthesis	ENOG41103WZ;ENOG410YDTD;ENOG4111F7T	S:Function unknown;G:Carbohydrate transport and metabolism;G:Carbohydrate transport and metabolism	KAF6989530.1	hypothetical protein CFC21_006856 [Triticum aestivum]	sp|A7QEU4|PER5_VITVI;	Peroxidase 5 OS=Vitis vinifera OX=29760 GN=GSVIVT00037159001 PE=1 SV=2;	PF00141.25	peroxidase	Peroxidase
TraesCS1B02G220100	0.656667	3.61833	-2.46209	-	GO:007194	CC:cell periphery;	------	------	------	------	ENOG410YZ4T	S:Function unknown	XP_037438238.1	uncharacterized protein LOC119305963 [Triticum dicoccoides]	------	------	PF01190.19	Pollen_Ole_e_1	Pollen protein Ole e 1 like
TraesCS1B02G223700	7.42667	36.185	-2.2846	-	------	------	------	------	------	------	ENOG41105Z0	S:Function unknown	KAF6989627.1	hypothetical protein CFC21_006941 [Triticum aestivum]	sp|Q01595|CCDP_MAIZE;	Cortical cell-delineating protein OS=Zea mays OX=4577 PE=2 SV=1;	PF14547.8;PF00234.24	Hydrophob_seed;Tryp_alpha_amyl	Hydrophobic seed protein;Protease inhibitor/seed storage/LTP family
TraesCS1B02G225200	0.775	1.90333	-1.29626	-	GO:0051225;GO:0005737;GO:0005880;GO:000801	BP:spindle assembly;CC:cytoplasm;CC:nuclear microtubule;MF:microtubule binding;	------	------	------	------	ENOG410YP4H	S:Function unknown	KAF6989644.1	hypothetical protein CFC21_006955 [Triticum aestivum]	sp|Q1PE51|QWRF7_ARATH;	QWRF motif-containing protein 7 OS=Arabidopsis thaliana OX=3702 GN=QWRF7 PE=2 SV=1;	PF04484.14	QWRF	QWRF family
TraesCS1B02G225700	43.6217	99.8442	-1.19463	-	GO:0019953;GO:000557	BP:sexual reproduction;CC:extracellular region;	------	------	------	------	ENOG410YEZU	G:Carbohydrate transport and metabolism	KAF6989649.1	hypothetical protein CFC21_006961 [Triticum aestivum]	sp|Q7XCA7|EXPB6_ORYSJ;	Expansin-B6 OS=Oryza sativa subsp. japonica OX=39947 GN=EXPB6 PE=2 SV=1;	PF01357.23;PF03330.20	Expansin_C;DPBB_1	Expansin C-terminal domain;Lytic transglycolase
TraesCS1B02G225800	10.3233	48.6017	-2.2351	Pollen allergen homolog [Source:UniProtKB/TrEMBL;Acc:Q9ZR84]	GO:0019953;GO:000557	BP:sexual reproduction;CC:extracellular region;	------	------	------	------	ENOG410YEZU;ENOG41105Y3	G:Carbohydrate transport and metabolism;	KAF6995352.1	hypothetical protein CFC21_011869 [Triticum aestivum]	sp|Q7XCA7|EXPB6_ORYSJ;	Expansin-B6 OS=Oryza sativa subsp. japonica OX=39947 GN=EXPB6 PE=2 SV=1;	PF01357.23;PF03330.20	Expansin_C;DPBB_1	Expansin C-terminal domain;Lytic transglycolase
TraesCS1B02G225900	0.935	0.240833	1.95693	-	GO:0019953;GO:0005618;GO:0016020;GO:0016021;GO:000557	BP:sexual reproduction;CC:cell wall;CC:membrane;CC:integral component of membrane;CC:extracellular region;	------	------	------	------	ENOG41105Y3;ENOG410YEZU	G:Carbohydrate transport and metabolism;	KAF6989652.1	hypothetical protein CFC21_006963 [Triticum aestivum]	sp|O24230|EXPB2_ORYSJ;	Expansin-B2 OS=Oryza sativa subsp. japonica OX=39947 GN=EXPB2 PE=2 SV=2;	PF01357.23;PF03330.20	Expansin_C;DPBB_1	Expansin C-terminal domain;Lytic transglycolase
TraesCS1B02G228600	2.29667	0.964167	1.25219	-	GO:0006896;GO:0006623;GO:0006511;GO:0005802;GO:0016021;GO:0016020;GO:0005768;GO:0017119;GO:0016874;GO:006163	BP:Golgi to vacuole transport;BP:protein targeting to vacuole;BP:ubiquitin-dependent protein catabolic process;CC:trans-Golgi network;CC:integral component of membrane;CC:membrane;CC:endosome;CC:Golgi transport complex;MF:ligase activity;MF:ubiquitin protein ligase activity;	K10663	ATL4	------	------	ENOG41121N2	O:Posttranslational modification, protein turnover, chaperones	KAF6989685.1	hypothetical protein CFC21_006989 [Triticum aestivum]	sp|Q8GW38|ATL47_ARATH;	RING-H2 finger protein ATL47 OS=Arabidopsis thaliana OX=3702 GN=ATL47 PE=2 SV=1;	PF13639.8;PF12678.9;PF12861.9;PF17123.7;PF13923.8;PF00097.27	zf-RING_2;zf-rbx1;zf-ANAPC11;zf-RING_11;zf-C3HC4_2;zf-C3HC4	Ring finger domain;RING-H2 zinc finger domain;Anaphase-promoting complex subunit 11 RING-H2 finger;RING-like zinc finger;Zinc finger, C3HC4 type;Zinc finger, C3HC4 type
TraesCS1B02G230100	9.13	23.945	-1.39104	-	GO:0000079;GO:001990	BP:regulation of cyclin-dependent protein serine/threonine kinase activity;MF:protein kinase binding;	------	------	------	------	ENOG4111TTK	S:Function unknown	KAF6989698.1	hypothetical protein CFC21_007000 [Triticum aestivum]	sp|Q7XC35|CCP41_ORYSJ;	Cyclin-P4-1 OS=Oryza sativa subsp. japonica OX=39947 GN=CYCP4-1 PE=2 SV=1;	PF08613.13;PF00134.25	Cyclin;Cyclin_N	Cyclin;Cyclin, N-terminal domain
TraesCS1B02G230200	2.52667	0.703333	1.84496	PRA1 family protein [Source:UniProtKB/TrEMBL;Acc:A0A1D5SG38]	GO:001602	CC:integral component of membrane;	------	------	------	------	ENOG410ZHHJ	S:Function unknown	KAF6989699.1	hypothetical protein CFC21_007001 [Triticum aestivum]	------	------	PF03208.21	PRA1	PRA1 family protein
TraesCS1B02G231500	2.6825	0.664167	2.01396	Ethylene-responsive transcription factor 6 [Source:Projected from Arabidopsis thaliana (AT4G17490) UniProtKB/Swiss-Prot;Acc:Q8VZ91]	GO:0010200;GO:0000302;GO:0009624;GO:0010087;GO:0006355;GO:0006351;GO:0009644;GO:0051301;GO:0005634;GO:0003700;GO:0000976;GO:000367	BP:response to chitin;BP:response to reactive oxygen species;BP:response to nematode;BP:phloem or xylem histogenesis;BP:regulation of transcription, DNA-templated;BP:transcription, DNA-templated;BP:response to high light intensity;BP:cell division;CC:nucleus;MF:transcription factor activity, sequence-specific DNA binding;MF:transcription regulatory region sequence-specific DNA binding;MF:DNA bind…	K09286	EREBP	------	------	ENOG410ZM5J;ENOG410Z37D	S:Function unknown;K:Transcription	XP_037467510.1	ethylene-responsive transcription factor ERF107-like [Triticum dicoccoides]	sp|Q40478|ERF5_TOBAC;	Ethylene-responsive transcription factor 5 OS=Nicotiana tabacum OX=4097 GN=ERF5 PE=2 SV=1;	PF00847.22	AP2	AP2 domain
TraesCS1B02G231900	2.88667	1.22417	1.2376	-	GO:0006415;GO:0000054;GO:0006413;GO:0042626;GO:0051536;GO:0016887;GO:0005506;GO:0046872;GO:0043024;GO:000552	BP:translational termination;BP:ribosomal subunit export from nucleus;BP:translational initiation;MF:ATPase activity, coupled to transmembrane movement of substances;MF:iron-sulfur cluster binding;MF:ATPase activity;MF:iron ion binding;MF:metal ion binding;MF:ribosomal small subunit binding;MF:ATP binding;	K06174	ABCE1, Rli1	------	------	COG1245	S:Function unknown	KAF6989713.1	hypothetical protein CFC21_007014 [Triticum aestivum]	sp|Q8LPJ4|AB2E_ARATH;	ABC transporter E family member 2 OS=Arabidopsis thaliana OX=3702 GN=ABCE2 PE=2 SV=1;	PF00005.29;PF04068.17;PF02463.21;PF00037.29;PF00004.31;PF03193.18;PF12837.9;PF05729.14;PF14697.8;PF12797.9;PF13237.8;PF11203.10	ABC_tran;RLI;SMC_N;Fer4;AAA;RsgA_GTPase;Fer4_6;NACHT;Fer4_21;Fer4_2;Fer4_10;EccE	ABC transporter;Possible Fer4-like domain in RNase L inhibitor, RLI;RecF/RecN/SMC N terminal domain;4Fe-4S binding domain;ATPase family associated with various cellular activities;RsgA GTPase;4Fe-4S binding domain;NACHT domain;4Fe-4S dicluster domain;4Fe-4S binding domain;4Fe-4S dicluster domain;Putative type VII ESX secretion system translocon, EccE
TraesCS1B02G232700	3.75167	1.1125	1.75373	-	GO:0006355;GO:0005634;GO:0043565;GO:0003700;GO:0003677;GO:000098	BP:regulation of transcription, DNA-templated;CC:nucleus;MF:sequence-specific DNA binding;MF:transcription factor activity, sequence-specific DNA binding;MF:DNA binding;MF:RNA polymerase II transcription factor activity, sequence-specific DNA binding;	K09338	HD-ZIP	------	------	ENOG410Z2UE	K:Transcription	XP_037467589.1	homeobox-leucine zipper protein HOX1-like [Triticum dicoccoides]	sp|Q40691|HOX1_ORYSI;	Homeobox-leucine zipper protein HOX1 OS=Oryza sativa subsp. indica OX=39946 GN=HOX1 PE=1 SV=2;	PF04618.14;PF00046.31;PF02183.20;PF05920.13	HD-ZIP_N;Homeodomain;HALZ;Homeobox_KN	HD-ZIP protein N terminus;Homeodomain;Homeobox associated leucine zipper;Homeobox KN domain
TraesCS1B02G233600	0.011667	0.161667	-3.79252	-	GO:0009909;GO:0005634;GO:000551	BP:regulation of flower development;CC:nucleus;MF:protein binding;	------	------	------	------	ENOG411051M	S:Function unknown	KAF6989738.1	hypothetical protein CFC21_007036 [Triticum aestivum]	sp|E5RQA1|GHD7_ORYSJ;	Transcription factor GHD7 OS=Oryza sativa subsp. japonica OX=39947 GN=GHD7 PE=1 SV=1;	PF06203.16	CCT	CCT motif
TraesCS1B02G235100	48.9442	21.485	1.18781	-	GO:0006355;GO:0006351;GO:0005634;GO:0003700;GO:000367	BP:regulation of transcription, DNA-templated;BP:transcription, DNA-templated;CC:nucleus;MF:transcription factor activity, sequence-specific DNA binding;MF:DNA binding;	------	------	------	------	ENOG410YKCQ	K:Transcription	VAH18239.1	unnamed protein product [Triticum turgidum subsp. durum]	sp|Q5W6R4|DRE2B_ORYSJ;	Dehydration-responsive element-binding protein 2B OS=Oryza sativa subsp. japonica OX=39947 GN=DREB2B PE=2 SV=2;	PF00847.22	AP2	AP2 domain
TraesCS1B02G238900	6.62833	13.395	-1.01498	-	GO:0016567;GO:0016021;GO:0016020;GO:0004842;GO:000827	BP:protein ubiquitination;CC:integral component of membrane;CC:membrane;MF:ubiquitin-protein transferase activity;MF:zinc ion binding;	------	------	------	------	COG5183	O:Posttranslational modification, protein turnover, chaperones	KAF6989795.1	hypothetical protein CFC21_007083 [Triticum aestivum]	sp|Q1LVZ2|MARH2_DANRE;	E3 ubiquitin-protein ligase MARCHF2 OS=Danio rerio OX=7955 GN=marchf2 PE=2 SV=1;	PF12428.10;PF12906.9	DUF3675;RINGv	Protein of unknown function;RING-variant domain
TraesCS1B02G244300	0.2325	0.793333	-1.7707	-	GO:0010099;GO:0009585;GO:0048573;GO:0048366;GO:0005634;GO:000551	BP:regulation of photomorphogenesis;BP:red, far-red light phototransduction;BP:photoperiodism, flowering;BP:leaf development;CC:nucleus;MF:protein binding;	------	------	------	------	ENOG410Y9MI	S:Function unknown	XP_037468466.1	phytochrome A-associated F-box protein-like [Triticum dicoccoides]	sp|Q8LEA8|EID1_ARATH;	Phytochrome A-associated F-box protein OS=Arabidopsis thaliana OX=3702 GN=EID1 PE=1 SV=2;	------	------	------
TraesCS1B02G249200	1.32	0.3425	1.94636	rRNA N-glycosidase [Source:UniProtKB/TrEMBL;Acc:A0A341P482]	GO:0006952;GO:0017148;GO:0030598;GO:0003723;GO:009072	BP:defense response;BP:negative regulation of translation;MF:rRNA N-glycosylase activity;MF:RNA binding;MF:toxin activity;	K14411	MSI	map03015	mRNA surveillance pathway	ENOG410YIXH;ENOG410ZF6B	S:Function unknown;	KAF6984414.1	hypothetical protein CFC21_002436 [Triticum aestivum]	sp|P04399|RIP2_HORVU;	Protein synthesis inhibitor II OS=Hordeum vulgare OX=4513 GN=RIP30A PE=1 SV=1;	PF00161.21	RIP	Ribosome inactivating protein
TraesCS1B02G250900	16.065	5.45833	1.55739	-	GO:000550	MF:calcium ion binding;	K13448	CML	map04626	Plant-pathogen interaction	COG5126;COG5126;COG5126	D:Cell cycle control, cell division, chromosome partitioning;T:Signal transduction mechanisms;Z:Cytoskeleton	XP_037469161.1	probable calcium-binding protein CML15 [Triticum dicoccoides]	sp|Q6L4D4|CML15_ORYSJ;	Probable calcium-binding protein CML15 OS=Oryza sativa subsp. japonica OX=39947 GN=CML15 PE=2 SV=1;	PF00036.34;PF13499.8;PF13202.8;PF13405.8;PF13833.8;PF10591.11;PF14658.8	EF-hand_1;EF-hand_7;EF-hand_5;EF-hand_6;EF-hand_8;SPARC_Ca_bdg;EF-hand_9	EF hand;EF-hand domain pair;EF hand;EF-hand domain;EF-hand domain pair;Secreted protein acidic and rich in cysteine Ca binding region;EF-hand domain
TraesCS1B02G251800	25.48	65.3692	-1.35925	-	GO:0005737;GO:0005544;GO:000550	CC:cytoplasm;MF:calcium-dependent phospholipid binding;MF:calcium ion binding;	K17098	ANNAT	------	------	ENOG410XPUN	S:Function unknown	KAF6989979.1	hypothetical protein CFC21_007244 [Triticum aestivum]	sp|Q9ZVJ6|ANXD4_ARATH;	Annexin D4 OS=Arabidopsis thaliana OX=3702 GN=ANN4 PE=1 SV=1;	PF00191.22	Annexin	Annexin
TraesCS1B02G253300	0.794167	0.153333	2.37277	-	GO:000368	MF:chromatin binding;	------	------	------	------	ENOG410ZNBY	S:Function unknown	XP_037438980.1	uncharacterized protein LOC119307002 [Triticum dicoccoides]	------	------	PF16719.7	SAWADEE	SAWADEE domain
TraesCS1B02G255300	0.246667	0.666667	-1.4344	-	------	------	------	------	------	------	ENOG411074K	S:Function unknown	KAF6990021.1	hypothetical protein CFC21_007280 [Triticum aestivum]	------	------	PF11250.10	FAF	Fantastic Four meristem regulator
TraesCS1B02G258400	6.58833	1.22917	2.42223	-	------	------	------	------	------	------	------	------	XP_037469869.1	uncharacterized protein LOC119342130 [Triticum dicoccoides]	------	------	------	------	------
TraesCS1B02G258700	7.68583	3.045	1.33576	-	GO:0016021;GO:0004252;GO:004687	CC:integral component of membrane;MF:serine-type endopeptidase activity;MF:metal ion binding;	K09651	RHBDD1	------	------	ENOG41100KJ	S:Function unknown	KAF6990065.1	hypothetical protein CFC21_007315 [Triticum aestivum]	sp|Q8RXW0|RBL14_ARATH;	Rhomboid-like protein 14, mitochondrial OS=Arabidopsis thaliana OX=3702 GN=RBL14 PE=2 SV=1;	PF01694.24;PF00641.20	Rhomboid;zf-RanBP	Rhomboid family;Zn-finger in Ran binding protein and others
TraesCS1B02G262500	0.386667	0.785833	-1.02313	-	GO:001602	CC:integral component of membrane;	------	------	------	------	ENOG410YBQC	S:Function unknown	XP_037474201.1	uncharacterized protein LOC119350496 [Triticum dicoccoides]	------	------	PF13968.8;PF04578.15;PF16577.7	DUF4220;DUF594;UBA_5	Domain of unknown function;Protein of unknown function, DUF594;UBA domain
TraesCS1B02G266500	0.828333	1.8225	-1.13764	Similar to 1-deoxy-D-xylulose-5-phosphate synthase [Source: Projected from Oryza sativa (Os05g0408900)]	GO:0052865;GO:0009228;GO:0015995;GO:0016114;GO:0009570;GO:0009507;GO:0046872;GO:0008661;GO:0003824;GO:001674	BP:1-deoxy-D-xylulose 5-phosphate biosynthetic process;BP:thiamine biosynthetic process;BP:chlorophyll biosynthetic process;BP:terpenoid biosynthetic process;CC:chloroplast stroma;CC:chloroplast;MF:metal ion binding;MF:1-deoxy-D-xylulose-5-phosphate synthase activity;MF:catalytic activity;MF:transferase activity, transferring aldehyde or ketonic groups;	K01662	dxs	map00730;map00900	Thiamine metabolism;Terpenoid backbone biosynthesis	COG1154	H:Coenzyme transport and metabolism	XP_037470223.1	1-deoxy-D-xylulose-5-phosphate synthase 1, chloroplastic-like [Triticum dicoccoides]	sp|O22567|DXS1_ORYSJ;	1-deoxy-D-xylulose-5-phosphate synthase 1, chloroplastic OS=Oryza sativa subsp. japonica OX=39947 GN=CLA1 PE=2 SV=2;	PF13292.8;PF02779.26;PF02780.22;PF02775.23;PF00676.22;PF00456.23	DXP_synthase_N;Transket_pyr;Transketolase_C;TPP_enzyme_C;E1_dh;Transketolase_N	1-deoxy-D-xylulose-5-phosphate synthase;Transketolase, pyrimidine binding domain;Transketolase, C-terminal domain;Thiamine pyrophosphate enzyme, C-terminal TPP binding domain;Dehydrogenase E1 component;Transketolase, thiamine diphosphate binding domain
TraesCS1B02G266800	4.12333	14.5117	-1.81533	-	------	------	------	------	------	------	COG1957	F:Nucleotide transport and metabolism	KAF6990162.1	hypothetical protein CFC21_007397 [Triticum aestivum]	sp|A0L0Y0|RIHA_SHESA;	Pyrimidine-specific ribonucleoside hydrolase RihA OS=Shewanella sp.;	PF01156.21	IU_nuc_hydro	Inosine-uridine preferring nucleoside hydrolase
TraesCS1B02G267300	0.299167	0.003333	6.48799	WAT1-related protein [Source:UniProtKB/TrEMBL;Acc:A0A1D5SEQ1]	GO:0016021;GO:0016020;GO:0005886;GO:002285	CC:integral component of membrane;CC:membrane;CC:plasma membrane;MF:transmembrane transporter activity;	------	------	------	------	ENOG410YD20	S:Function unknown	KAF6990169.1	hypothetical protein CFC21_007402 [Triticum aestivum]	sp|Q9FL41|WTR38_ARATH;	WAT1-related protein At5g07050 OS=Arabidopsis thaliana OX=3702 GN=At5g07050 PE=2 SV=1;	PF00892.22	EamA	EamA-like transporter family
TraesCS1B02G267700	3.67917	0.225833	4.02605	-	GO:0051301;GO:0016021;GO:0016887;GO:000552	BP:cell division;CC:integral component of membrane;MF:ATPase activity;MF:ATP binding;	------	------	------	------	COG0464;COG0465	O:Posttranslational modification, protein turnover, chaperones;	KAF6990172.1	hypothetical protein CFC21_007405 [Triticum aestivum]	sp|Q9FLD5|ASD_ARATH;	AAA-ATPase ASD, mitochondrial OS=Arabidopsis thaliana OX=3702 GN=AATP1 PE=1 SV=1;	PF14363.8;PF00004.31;PF20030.1	AAA_assoc;AAA;bpMoxR	Domain associated at C-terminal with AAA;ATPase family associated with various cellular activities;MoxR domain in the MoxR-vWA-beta-propeller ternary systems
TraesCS1B02G275800	0.5175	2.67167	-2.36811	Dirigent protein [Source:UniProtKB/TrEMBL;Acc:A0A1D5SGQ6]	GO:004804	CC:apoplast;	------	------	------	------	ENOG410YZUA	S:Function unknown	XP_037471060.1	dirigent protein 1-like [Triticum dicoccoides]	sp|Q9FIG7|DIR2_ARATH;	Dirigent protein 2 OS=Arabidopsis thaliana OX=3702 GN=DIR2 PE=2 SV=1;	PF03018.16	Dirigent	Dirigent-like protein
TraesCS1B02G276200	284.555	87.2025	1.70627	-	GO:0010951;GO:0005576;GO:000486	BP:negative regulation of endopeptidase activity;CC:extracellular region;MF:serine-type endopeptidase inhibitor activity;	------	------	------	------	ENOG411070C	S:Function unknown	XP_037439381.1	uncharacterized protein LOC119307405 [Triticum dicoccoides]	------	------	------	------	------
TraesCS1B02G277500	2.63333	6.05417	-1.20104	Hexosyltransferase [Source:UniProtKB/TrEMBL;Acc:A0A1D5S9Z8]	GO:0045492;GO:0016021;GO:001675	BP:xylan biosynthetic process;CC:integral component of membrane;MF:transferase activity, transferring glycosyl groups;	K20890	GUX	------	------	COG5597	O:Posttranslational modification, protein turnover, chaperones	XP_037471133.1	UDP-glucuronate:xylan alpha-glucuronosyltransferase 1-like [Triticum dicoccoides]	sp|Q9LSB1|GUX1_ARATH;	UDP-glucuronate:xylan alpha-glucuronosyltransferase 1 OS=Arabidopsis thaliana OX=3702 GN=GUX1 PE=2 SV=1;	PF01501.22;PF03407.18	Glyco_transf_8;Nucleotid_trans	Glycosyl transferase family 8;Nucleotide-diphospho-sugar transferase
TraesCS1B02G278600	0.08	0.358333	-2.16323	-	GO:0006813;GO:0006811;GO:0055085;GO:0034765;GO:0016021;GO:0016020;GO:0005249;GO:0005515;GO:000521	BP:potassium ion transport;BP:ion transport;BP:transmembrane transport;BP:regulation of ion transmembrane transport;CC:integral component of membrane;CC:membrane;MF:voltage-gated potassium channel activity;MF:protein binding;MF:ion channel activity;	K21867	AKT, KAT, GORK, SKOR	------	------	ENOG410XPSE	U:Intracellular trafficking, secretion, and vesicular transport	KAF6990306.1	hypothetical protein CFC21_007511 [Triticum aestivum]	sp|Q75HP9|AKT2_ORYSJ;	Potassium channel AKT2 OS=Oryza sativa subsp. japonica OX=39947 GN=Os05g0428700 PE=2 SV=1;	PF00520.33;PF11834.10;PF12796.9;PF00027.31;PF07885.18;PF13637.8;PF13857.8;PF00023.32	Ion_trans;KHA;Ank_2;cNMP_binding;Ion_trans_2;Ank_4;Ank_5;Ank	Ion transport protein;KHA, dimerisation domain of potassium ion channel;Ankyrin repeats;Cyclic nucleotide-binding domain;Ion channel;Ankyrin repeats;Ankyrin repeats;Ankyrin repeat
TraesCS1B02G279400	3.245	6.9975	-1.10862	-	GO:000367	MF:DNA binding;	K09422	MYBP	------	------	COG5147	K:Transcription	KAF6990315.1	hypothetical protein CFC21_007518 [Triticum aestivum]	sp|P81393|MYB08_ANTMA;	Myb-related protein 308 OS=Antirrhinum majus OX=4151 GN=MYB308 PE=2 SV=1;	PF00249.33;PF13921.8	Myb_DNA-binding;Myb_DNA-bind_6	Myb-like DNA-binding domain;Myb-like DNA-binding domain
TraesCS1B02G281400	3.485	10.7292	-1.62231	-	GO:001602	CC:integral component of membrane;	------	------	------	------	ENOG41120RW	S:Function unknown	XP_037474211.1	calcium homeostasis endoplasmic reticulum protein-like [Triticum dicoccoides]	sp|A2RVU1|MWL1_ARATH;	Protein MODIFYING WALL LIGNIN-1 OS=Arabidopsis thaliana OX=3702 GN=MWL1 PE=1 SV=2;	PF06749.14	DUF1218	Protein of unknown function
TraesCS1B02G282600	8.39	3.22917	1.37751	-	------	------	------	------	------	------	------	------	KAF6990342.1	hypothetical protein CFC21_007543 [Triticum aestivum]	------	------	------	------	------
TraesCS1B02G282700	3.85167	1.895	1.02329	-	GO:0016021;GO:000419	CC:integral component of membrane;MF:aspartic-type endopeptidase activity;	------	------	------	------	------	------	VAH19573.1	unnamed protein product [Triticum turgidum subsp. durum]	------	------	------	------	------
TraesCS1B02G283400	6.11833	2.16167	1.50099	-	GO:0006468;GO:0016021;GO:0005524;GO:000467	BP:protein phosphorylation;CC:integral component of membrane;MF:ATP binding;MF:protein kinase activity;	------	------	------	------	COG0515	T:Signal transduction mechanisms	XP_037439567.1	putative receptor-like protein kinase At4g00960 [Triticum dicoccoides]	sp|O65468|CRK8_ARATH;	Cysteine-rich receptor-like protein kinase 8 OS=Arabidopsis thaliana OX=3702 GN=CRK8 PE=3 SV=2;	PF07714.19;PF00069.27;PF01657.19	PK_Tyr_Ser-Thr;Pkinase;Stress-antifung	Protein tyrosine and serine/threonine kinase;Protein kinase domain;Salt stress response/antifungal
TraesCS1B02G285400	0.1625	0.834167	-2.3599	-	GO:0005975;GO:000455	BP:carbohydrate metabolic process;MF:hydrolase activity, hydrolyzing O-glycosyl compounds;	------	------	------	------	ENOG410YA4N	G:Carbohydrate transport and metabolism	XP_037471564.1	glucan endo-1,3-beta-glucosidase 14-like [Triticum dicoccoides]	sp|Q9ZQG9|E1314_ARATH;	Glucan endo-1,3-beta-glucosidase 14 OS=Arabidopsis thaliana OX=3702 GN=At2g27500 PE=2 SV=2;	PF00332.20	Glyco_hydro_17	Glycosyl hydrolases family 17
TraesCS1B02G286300	3.92667	1.8775	1.06449	-	GO:0016021;GO:0004497;GO:0016705;GO:0005506;GO:002003	CC:integral component of membrane;MF:monooxygenase activity;MF:oxidoreductase activity, acting on paired donors, with incorporation or reduction of molecular oxygen;MF:iron ion binding;MF:heme binding;	K20624	CYP94C1	------	------	COG2124	Q:Secondary metabolites biosynthesis, transport and catabolism	XP_037471633.1	cytochrome P450 94C1-like [Triticum dicoccoides]	sp|Q9ZUX1|C94C1_ARATH;	Cytochrome P450 94C1 OS=Arabidopsis thaliana OX=3702 GN=CYP94C1 PE=1 SV=1;	PF00067.24	p450	Cytochrome P450
TraesCS1B02G287400	8.92417	3.775	1.24124	-	------	------	------	------	------	------	ENOG41115NE	S:Function unknown	KAF6990399.1	hypothetical protein CFC21_007594 [Triticum aestivum]	------	------	------	------	------
TraesCS1B02G287500	9.62	3.33083	1.53015	-	GO:0006396;GO:000551	BP:RNA processing;MF:protein binding;	------	------	------	------	ENOG4111RQ5	S:Function unknown	VAH19735.1	unnamed protein product [Triticum turgidum subsp. durum]	------	------	PF14559.8;PF13428.8;PF13432.8	TPR_19;TPR_14;TPR_16	Tetratricopeptide repeat;Tetratricopeptide repeat;Tetratricopeptide repeat
TraesCS1B02G289700	61.4242	142.497	-1.21405	-	GO:0034337;GO:0061077;GO:0009409;GO:0009408;GO:0006979;GO:0005737;GO:0005634;GO:000367	BP:RNA folding;BP:chaperone-mediated protein folding;BP:response to cold;BP:response to heat;BP:response to oxidative stress;CC:cytoplasm;CC:nucleus;MF:nucleic acid binding;	------	------	------	------	ENOG410YI8C	T:Signal transduction mechanisms	XP_020184864.1	universal stress protein PHOS32 [Aegilops tauschii subsp. strangulata]	sp|Q8VYN9|PHO32_ARATH;	Universal stress protein PHOS32 OS=Arabidopsis thaliana OX=3702 GN=PHOS32 PE=1 SV=1;	PF00582.28	Usp	Universal stress protein family
TraesCS1B02G292200	0.8875	1.85583	-1.06425	-	GO:0010143;GO:0016021;GO:0016020;GO:0016791;GO:0090447;GO:001674	BP:cutin biosynthetic process;CC:integral component of membrane;CC:membrane;MF:phosphatase activity;MF:glycerol-3-phosphate 2-O-acyltransferase activity;MF:transferase activity, transferring acyl groups;	K13508	GPAT	map00564;map00561	Glycerophospholipid metabolism;Glycerolipid metabolism	ENOG410YAYJ	I:Lipid transport and metabolism	XP_037471993.1	glycerol-3-phosphate acyltransferase 5-like [Triticum dicoccoides]	sp|Q9CAY3|GPAT5_ARATH;	Glycerol-3-phosphate acyltransferase 5 OS=Arabidopsis thaliana OX=3702 GN=GPAT5 PE=1 SV=1;	PF01553.23	Acyltransferase	Acyltransferase
TraesCS1B02G293700	4.34083	1.20417	1.84994	-	GO:0007018;GO:0006004;GO:0005874;GO:0016021;GO:0008017;GO:0016740;GO:1990939;GO:000552	BP:microtubule-based movement;BP:fucose metabolic process;CC:microtubule;CC:integral component of membrane;MF:microtubule binding;MF:transferase activity;MF:ATP-dependent microtubule motor activity;MF:ATP binding;	------	------	------	------	ENOG410XT6Z	S:Function unknown	VAH19896.1	unnamed protein product [Triticum turgidum subsp. durum]	sp|Q9ZVF7|ESMD1_ARATH;	Protein ESMERALDA 1 OS=Arabidopsis thaliana OX=3702 GN=ESMD1 PE=2 SV=1;	PF10250.11	O-FucT	GDP-fucose protein O-fucosyltransferase
TraesCS1B02G293900	0.368333	0.8875	-1.26874	-	GO:0016021;GO:0016020;GO:001649	CC:integral component of membrane;CC:membrane;MF:oxidoreductase activity;	K13447	RBOH	map04016;map04626	MAPK signaling pathway - plant;Plant-pathogen interaction	ENOG410XNZY	U:Intracellular trafficking, secretion, and vesicular transport	KAF6990480.1	hypothetical protein CFC21_007667 [Triticum aestivum]	sp|O48538|RBOHF_ARATH;	Respiratory burst oxidase homolog protein F OS=Arabidopsis thaliana OX=3702 GN=RBOHF PE=1 SV=1;	PF08030.14;PF08022.14;PF01794.21	NAD_binding_6;FAD_binding_8;Ferric_reduct	Ferric reductase NAD binding domain;FAD-binding domain;Ferric reductase like transmembrane component
TraesCS1B02G294300	257.387	29.3825	3.13091	-	GO:0034620;GO:0051085;GO:0042026;GO:0005737;GO:0031072;GO:0044183;GO:0051082;GO:0051787;GO:0016887;GO:000552	BP:cellular response to unfolded protein;BP:chaperone mediated protein folding requiring cofactor;BP:protein refolding;CC:cytoplasm;MF:heat shock protein binding;MF:protein binding involved in protein folding;MF:unfolded protein binding;MF:misfolded protein binding;MF:ATPase activity;MF:ATP binding;	K03283	HSPA1s	map04144;map04141;map03040	Endocytosis;Protein processing in endoplasmic reticulum;Spliceosome	COG0443	O:Posttranslational modification, protein turnover, chaperones	XP_037472080.1	heat shock 70 kDa protein 4 [Triticum dicoccoides]	sp|Q9LHA8|HS704_ARATH;	Heat shock 70 kDa protein 4 OS=Arabidopsis thaliana OX=3702 GN=HSP70-4 PE=1 SV=1;	PF00012.22;PF06723.15	HSP70;MreB_Mbl	Hsp70 protein;MreB/Mbl protein
TraesCS1B02G299700	7.44917	3.585	1.05511	-	GO:0046658;GO:000905	CC:anchored component of plasma membrane;MF:electron carrier activity;	------	------	------	------	ENOG410YT2D	S:Function unknown	KAF6990550.1	hypothetical protein CFC21_007723 [Triticum aestivum]	sp|O82081|UCC1_ARATH;	Uclacyanin 1 OS=Arabidopsis thaliana OX=3702 GN=UCC1 PE=1 SV=1;	PF02298.19	Cu_bind_like	Plastocyanin-like domain
TraesCS1B02G302800	0.8225	0.418333	0.975364	-	GO:000551	MF:protein binding;	------	------	------	------	ENOG410YYM5;ENOG41107TY	U:Intracellular trafficking, secretion, and vesicular transport;S:Function unknown	XP_037472439.1	uncharacterized protein LOC119348397 [Triticum dicoccoides]	------	------	PF07893.15	DUF1668	Protein of unknown function
TraesCS1B02G304600	6.92167	2.18	1.66679	-	------	------	------	------	------	------	ENOG410Z7H4	S:Function unknown	XP_037440114.1	uncharacterized protein LOC119308105 [Triticum dicoccoides]	------	------	PF05553.13	DUF761	Cotton fibre expressed protein
TraesCS1B02G305200	10.6267	5.16667	1.04038	-	GO:0006468;GO:0016021;GO:0005524;GO:000467	BP:protein phosphorylation;CC:integral component of membrane;MF:ATP binding;MF:protein kinase activity;	------	------	------	------	COG0515	T:Signal transduction mechanisms	KAF6990610.1	hypothetical protein CFC21_007779 [Triticum aestivum]	sp|C0LGQ4|MDIS2_ARATH;	Protein MALE DISCOVERER 2 OS=Arabidopsis thaliana OX=3702 GN=MDIS2 PE=1 SV=1;	PF07714.19;PF08263.14;PF00069.27;PF13855.8	PK_Tyr_Ser-Thr;LRRNT_2;Pkinase;LRR_8	Protein tyrosine and serine/threonine kinase;Leucine rich repeat N-terminal domain;Protein kinase domain;Leucine rich repeat
TraesCS1B02G308200	7.47333	2.73	1.45285	-	GO:0006355;GO:0005634;GO:0003700;GO:004356	BP:regulation of transcription, DNA-templated;CC:nucleus;MF:transcription factor activity, sequence-specific DNA binding;MF:sequence-specific DNA binding;	K13424	WRKY33	map04016;map04626	MAPK signaling pathway - plant;Plant-pathogen interaction	ENOG410YHVA;ENOG4112BTF	K:Transcription;	KAF6990642.1	hypothetical protein CFC21_007813 [Triticum aestivum]	sp|Q6IEQ7|WRK24_ORYSJ;	WRKY transcription factor WRKY24 OS=Oryza sativa subsp. japonica OX=39947 GN=WRKY24 PE=2 SV=1;	PF03106.17	WRKY	WRKY DNA -binding domain
TraesCS1B02G308500	4.56167	1.31333	1.79633	-	GO:0061635;GO:0009535;GO:001602	BP:regulation of protein complex stability;CC:chloroplast thylakoid membrane;CC:integral component of membrane;	------	------	------	------	ENOG4111PN6	S:Function unknown	KAF6990645.1	hypothetical protein CFC21_007816 [Triticum aestivum]	sp|Q9FL44|MPH1_ARATH;	Protein MAINTENANCE OF PSII UNDER HIGH LIGHT 1 OS=Arabidopsis thaliana OX=3702 GN=MPH1 PE=1 SV=1;	------	------	------
TraesCS1B02G308600	11.14	4.60833	1.27343	-	GO:0006886;GO:0005622;GO:0035091;GO:004313	BP:intracellular protein transport;CC:intracellular;MF:phosphatidylinositol binding;MF:ubiquitin binding;	------	------	------	------	ENOG410Y26G	S:Function unknown	KAF6990646.1	hypothetical protein CFC21_007817 [Triticum aestivum]	sp|O80910|TOL6_ARATH;	TOM1-like protein 6 OS=Arabidopsis thaliana OX=3702 GN=TOL6 PE=1 SV=1;	PF03127.16;PF00790.21	GAT;VHS	GAT domain;VHS domain
TraesCS1B02G310100	11.145	4.96083	1.16774	RING-type E3 ubiquitin transferase [Source:UniProtKB/TrEMBL;Acc:A0A1D6D7Y3]	GO:0016567;GO:0051865;GO:0005737;GO:0005634;GO:0005515;GO:000484	BP:protein ubiquitination;BP:protein autoubiquitination;CC:cytoplasm;CC:nucleus;MF:protein binding;MF:ubiquitin-protein transferase activity;	------	------	------	------	ENOG410XQT6;ENOG410XRTN	S:Function unknown;	KAF6990663.1	hypothetical protein CFC21_007833 [Triticum aestivum]	sp|Q9LZW3|PUB16_ARATH;	U-box domain-containing protein 16 OS=Arabidopsis thaliana OX=3702 GN=PUB16 PE=2 SV=1;	PF04564.17;PF00514.25;PF04826.15;PF13646.8;PF11789.10	U-box;Arm;Arm_2;HEAT_2;zf-Nse	U-box domain;Armadillo/beta-catenin-like repeat;Armadillo-like;HEAT repeats;Zinc-finger of the MIZ type in Nse subunit
TraesCS1B02G313800	0.376667	2.20583	-2.54996	Patatin [Source:UniProtKB/TrEMBL;Acc:A0A1D5SHB6]	GO:0006629;GO:0016042;GO:001678	BP:lipid metabolic process;BP:lipid catabolic process;MF:hydrolase activity;	------	------	------	------	COG3621	S:Function unknown	KAF6990694.1	hypothetical protein CFC21_007864 [Triticum aestivum]	sp|B8AQW7|PLP1_ORYSI;	Patatin-like protein 1 OS=Oryza sativa subsp. indica OX=39946 GN=PLP1 PE=3 SV=1;	PF01734.24	Patatin	Patatin-like phospholipase
TraesCS1B02G316700	0.309167	0.02	3.95031	-	------	------	------	------	------	------	ENOG410YY93	S:Function unknown	KAF6990733.1	hypothetical protein CFC21_007895 [Triticum aestivum]	sp|Q9LZH5|LTPG2_ARATH;	Non-specific lipid transfer protein GPI-anchored 2 OS=Arabidopsis thaliana OX=3702 GN=LTPG2 PE=2 SV=1;	PF14368.8;PF00234.24	LTP_2;Tryp_alpha_amyl	Probable lipid transfer;Protease inhibitor/seed storage/LTP family
TraesCS1B02G316800	0.770833	0.341667	1.17383	-	GO:0016787;GO:0003924;GO:000552	MF:hydrolase activity;MF:GTPase activity;MF:GTP binding;	K24104	GPN	------	------	ENOG410XNRC	S:Function unknown	KAF6990734.1	hypothetical protein CFC21_007896 [Triticum aestivum]	sp|Q8W586|QQT2_ARATH;	GPN-loop GTPase QQT2 OS=Arabidopsis thaliana OX=3702 GN=QQT2 PE=1 SV=1;	PF03029.19;PF00009.29;PF02421.20;PF01926.25;PF13238.8	ATP_bind_1;GTP_EFTU;FeoB_N;MMR_HSR1;AAA_18	Conserved hypothetical ATP binding protein;Elongation factor Tu GTP binding domain;Ferrous iron transport protein B;50S ribosome-binding GTPase;AAA domain
TraesCS1B02G318800	1.18333	0.5625	1.07293	-	GO:000367	MF:DNA binding;	K09422	MYBP	------	------	COG5147	K:Transcription	XP_037472648.1	transcription factor GAMYB-like isoform X1 [Triticum dicoccoides]	sp|A2WW87|GAM1_ORYSI;	Transcription factor GAMYB OS=Oryza sativa subsp. indica OX=39946 GN=GAM1 PE=2 SV=1;	PF00249.33;PF13921.8	Myb_DNA-binding;Myb_DNA-bind_6	Myb-like DNA-binding domain;Myb-like DNA-binding domain
TraesCS1B02G320500	0.379167	0.103333	1.87553	-	GO:0006952;GO:0005524;GO:004353	BP:defense response;MF:ATP binding;MF:ADP binding;	------	------	------	------	COG4886	S:Function unknown	KAF6990779.1	hypothetical protein CFC21_007937 [Triticum aestivum]	sp|Q9LRR4|R13L1_ARATH;	Putative disease resistance RPP13-like protein 1 OS=Arabidopsis thaliana OX=3702 GN=RPPL1 PE=3 SV=1;	PF00931.24;PF18052.3;PF12799.9;PF13855.8;PF13191.8	NB-ARC;Rx_N;LRR_4;LRR_8;AAA_16	NB-ARC domain;Rx N-terminal domain;Leucine Rich repeats;Leucine rich repeat;AAA ATPase domain
TraesCS1B02G320600	0.8775	0.21	2.06301	-	GO:0006952;GO:0005524;GO:004353	BP:defense response;MF:ATP binding;MF:ADP binding;	------	------	------	------	COG4886	S:Function unknown	KAF6990780.1	hypothetical protein CFC21_007938 [Triticum aestivum]	sp|Q9LRR4|R13L1_ARATH;	Putative disease resistance RPP13-like protein 1 OS=Arabidopsis thaliana OX=3702 GN=RPPL1 PE=3 SV=1;	PF12799.9;PF13855.8	LRR_4;LRR_8	Leucine Rich repeats;Leucine rich repeat
TraesCS1B02G321700	1.02333	3.02583	-1.56406	-	GO:0005542;GO:001674	MF:folic acid binding;MF:transferase activity;	------	------	------	------	COG3643	E:Amino acid transport and metabolism	KAF6990793.1	hypothetical protein CFC21_007950 [Triticum aestivum]	sp|Q6KZM5|GLFT_PICTO;	Glutamate formimidoyltransferase OS=Picrophilus torridus;	PF07837.14	FTCD_N	Formiminotransferase domain, N-terminal subdomain
TraesCS1B02G324300	2.72083	8.25583	-1.60137	-	GO:0005975;GO:0016021;GO:000455	BP:carbohydrate metabolic process;CC:integral component of membrane;MF:hydrolase activity, hydrolyzing O-glycosyl compounds;	------	------	------	------	ENOG410YFZD	G:Carbohydrate transport and metabolism	KAF6990819.1	hypothetical protein CFC21_007973 [Triticum aestivum]	sp|Q02439|E13F_HORVU;	Putative glucan endo-1,3-beta-glucosidase GVI;	PF00332.20	Glyco_hydro_17	Glycosyl hydrolases family 17
TraesCS1B02G326600	31.2158	12.8125	1.28473	Ethylene-responsive factor-like transcription factor ERFL2a [Source:UniProtKB/TrEMBL;Acc:A7XA01]	GO:0006355;GO:0006351;GO:0005634;GO:0003700;GO:000367	BP:regulation of transcription, DNA-templated;BP:transcription, DNA-templated;CC:nucleus;MF:transcription factor activity, sequence-specific DNA binding;MF:DNA binding;	K09286	EREBP	------	------	ENOG410YQNQ	K:Transcription	ABC65855.1	ethylene-responsive factor-like transcription factor ERFL2a [Triticum aestivum]	sp|Q9LW49|ERF4_NICSY;	Ethylene-responsive transcription factor 4 OS=Nicotiana sylvestris OX=4096 GN=ERF4 PE=2 SV=1;	PF00847.22	AP2	AP2 domain
TraesCS1B02G328000	1.15083	0.298333	1.94768	-	GO:001602	CC:integral component of membrane;	------	------	------	------	------	------	XP_037440853.1	uncharacterized protein LOC119308801 [Triticum dicoccoides]	------	------	------	------	------
TraesCS1B02G330700	0.284167	2.35083	-3.04836	Peroxidase [Source:UniProtKB/TrEMBL;Acc:A0A341P814]	GO:0006979;GO:0042744;GO:0005576;GO:0020037;GO:0046872;GO:000460	BP:response to oxidative stress;BP:hydrogen peroxide catabolic process;CC:extracellular region;MF:heme binding;MF:metal ion binding;MF:peroxidase activity;	K00430	E1.11.1.7	map00940	Phenylpropanoid biosynthesis	ENOG410YDBA	G:Carbohydrate transport and metabolism	KAF6990889.1	hypothetical protein CFC21_008037 [Triticum aestivum]	sp|P37834|PER1_ORYSJ;	Peroxidase 1 OS=Oryza sativa subsp. japonica OX=39947 GN=PRX74 PE=2 SV=2;	PF00141.25	peroxidase	Peroxidase
TraesCS1B02G330800	0.2275	1.78833	-2.97468	Peroxidase [Source:UniProtKB/TrEMBL;Acc:A0A341P5H3]	GO:0006979;GO:0042744;GO:0005576;GO:0020037;GO:0046872;GO:000460	BP:response to oxidative stress;BP:hydrogen peroxide catabolic process;CC:extracellular region;MF:heme binding;MF:metal ion binding;MF:peroxidase activity;	K00430	E1.11.1.7	map00940	Phenylpropanoid biosynthesis	ENOG410YDBA	G:Carbohydrate transport and metabolism	KAF6990883.1	hypothetical protein CFC21_008032 [Triticum aestivum]	sp|P37834|PER1_ORYSJ;	Peroxidase 1 OS=Oryza sativa subsp. japonica OX=39947 GN=PRX74 PE=2 SV=2;	PF00141.25	peroxidase	Peroxidase
TraesCS1B02G330900	0.279167	2.20583	-2.98212	-	GO:0006979;GO:0042744;GO:0005576;GO:0020037;GO:0046872;GO:000460	BP:response to oxidative stress;BP:hydrogen peroxide catabolic process;CC:extracellular region;MF:heme binding;MF:metal ion binding;MF:peroxidase activity;	K00430	E1.11.1.7	map00940	Phenylpropanoid biosynthesis	------	------	VAH20737.1	unnamed protein product [Triticum turgidum subsp. durum]	sp|P37834|PER1_ORYSJ;	Peroxidase 1 OS=Oryza sativa subsp. japonica OX=39947 GN=PRX74 PE=2 SV=2;	PF00141.25	peroxidase	Peroxidase
TraesCS1B02G333800	6.27833	13.1983	-1.0719	-	GO:001678	MF:hydrolase activity, acting on ester bonds;	------	------	------	------	ENOG41107DJ	S:Function unknown	XP_037472778.1	GDSL esterase/lipase At5g45910-like [Triticum dicoccoides]	sp|Q9FJ45|GDL83_ARATH;	GDSL esterase/lipase At5g45910 OS=Arabidopsis thaliana OX=3702 GN=At5g45910 PE=2 SV=1;	PF00657.24	Lipase_GDSL	GDSL-like Lipase/Acylhydrolase
TraesCS1B02G335300	1.33333	0.33	2.0145	-	------	------	------	------	------	------	COG4886;ENOG41106XE	S:Function unknown;	KAF6990940.1	hypothetical protein CFC21_008083 [Triticum aestivum]	sp|Q7XA40|RGA3_SOLBU;	Putative disease resistance protein RGA3 OS=Solanum bulbocastanum OX=147425 GN=RGA3 PE=2 SV=2;	PF18052.3	Rx_N	Rx N-terminal domain
TraesCS1B02G335400	1.63667	0.3725	2.13545	-	------	------	------	------	------	------	COG4886;ENOG41106XE	S:Function unknown;	KAF6990941.1	hypothetical protein CFC21_008084 [Triticum aestivum]	------	------	PF18052.3	Rx_N	Rx N-terminal domain
TraesCS1B02G335800	0.37	0.064167	2.52762	-	------	------	------	------	------	------	COG4886;ENOG41106XE	S:Function unknown;	KAF6990945.1	hypothetical protein CFC21_008088 [Triticum aestivum]	sp|Q7XBQ9|RGA2_SOLBU;	Disease resistance protein RGA2 OS=Solanum bulbocastanum OX=147425 GN=RGA2 PE=1 SV=1;	PF18052.3;PF00931.24	Rx_N;NB-ARC	Rx N-terminal domain;NB-ARC domain
TraesCS1B02G337400	1.8325	3.69583	-1.01209	-	GO:0009658;GO:0010438;GO:0010439;GO:0009579;GO:0009536;GO:000551	BP:chloroplast organization;BP:cellular response to sulfur starvation;BP:regulation of glucosinolate biosynthetic process;CC:thylakoid;CC:plastid;MF:protein binding;	------	------	------	------	ENOG410YFAS	S:Function unknown	KAF6990959.1	hypothetical protein CFC21_008103 [Triticum aestivum]	sp|Q8GXU5|SDI1_ARATH;	Protein SULFUR DEFICIENCY-INDUCED 1 OS=Arabidopsis thaliana OX=3702 GN=SDI1 PE=2 SV=1;	PF13181.8;PF07719.19;PF00515.30;PF13424.8;PF13176.8;PF13432.8;PF13374.8;PF14559.8;PF12895.9	TPR_8;TPR_2;TPR_1;TPR_12;TPR_7;TPR_16;TPR_10;TPR_19;ANAPC3	Tetratricopeptide repeat;Tetratricopeptide repeat;Tetratricopeptide repeat;Tetratricopeptide repeat;Tetratricopeptide repeat;Tetratricopeptide repeat;Tetratricopeptide repeat;Tetratricopeptide repeat;Anaphase-promoting complex, cyclosome, subunit 3
TraesCS1B02G339300	0.040833	0.116667	-1.51459	-	GO:001602	CC:integral component of membrane;	------	------	------	------	ENOG41106I0	S:Function unknown	VAH20936.1	unnamed protein product [Triticum turgidum subsp. durum]	------	------	PF13968.8;PF04578.15	DUF4220;DUF594	Domain of unknown function;Protein of unknown function, DUF594
TraesCS1B02G341600	0.244167	0.0075	5.02483	Serine/threonine-protein kinase [Source:UniProtKB/TrEMBL;Acc:A0A1D6RDW5]	GO:0006468;GO:0048544;GO:0016021;GO:0004674;GO:0106311;GO:0004672;GO:0106310;GO:000552	BP:protein phosphorylation;BP:recognition of pollen;CC:integral component of membrane;MF:protein serine/threonine kinase activity;MF:old GO;MF:protein kinase activity;MF:old GO;MF:ATP binding;	------	------	------	------	COG0515	T:Signal transduction mechanisms	KAF6991010.1	hypothetical protein CFC21_008146 [Triticum aestivum]	sp|O81906|B120_ARATH;	G-type lectin S-receptor-like serine/threonine-protein kinase B120 OS=Arabidopsis thaliana OX=3702 GN=B120 PE=2 SV=1;	PF07714.19;PF00069.27;PF01453.26;PF00954.22;PF08276.13	PK_Tyr_Ser-Thr;Pkinase;B_lectin;S_locus_glycop;PAN_2	Protein tyrosine and serine/threonine kinase;Protein kinase domain;D-mannose binding lectin;S-locus glycoprotein domain;PAN-like domain
TraesCS1B02G342500	0.515833	0.060833	3.08398	-	GO:0006355;GO:0006351;GO:0005634;GO:0003700;GO:000367	BP:regulation of transcription, DNA-templated;BP:transcription, DNA-templated;CC:nucleus;MF:transcription factor activity, sequence-specific DNA binding;MF:DNA binding;	K14516	ERF1	map04016;map04075	MAPK signaling pathway - plant;Plant hormone signal transduction	ENOG4111E8T;ENOG410YJNR	K:Transcription;	KAF6991022.1	hypothetical protein CFC21_008154 [Triticum aestivum]	sp|A0A3Q7I5Y9|ERFC3_SOLLC;	Ethylene-response factor C3 OS=Solanum lycopersicum OX=4081 GN=ERF.C.3 PE=2 SV=1;	PF00847.22	AP2	AP2 domain
TraesCS1B02G344900	1.66667	5.36833	-1.68751	Inositol-tetrakisphosphate 1-kinase [Source:UniProtKB/TrEMBL;Acc:A0A341P9U1]	GO:0052746;GO:0032957;GO:0005737;GO:0005829;GO:0047325;GO:0000287;GO:0052726;GO:0046872;GO:0052725;GO:000552	BP:inositol phosphorylation;BP:inositol trisphosphate metabolic process;CC:cytoplasm;CC:cytosol;MF:inositol tetrakisphosphate 1-kinase activity;MF:magnesium ion binding;MF:inositol-1,3,4-trisphosphate 5-kinase activity;MF:metal ion binding;MF:inositol-1,3,4-trisphosphate 6-kinase activity;MF:ATP binding;	K00913	ITPK1	map04070;map00562	Phosphatidylinositol signaling system;Inositol phosphate metabolism	ENOG4110KIK	G:Carbohydrate transport and metabolism	KAF6991053.1	hypothetical protein CFC21_008177 [Triticum aestivum]	sp|A2X4M8|ITPK4_ORYSI;	Inositol-tetrakisphosphate 1-kinase 4 OS=Oryza sativa subsp. indica OX=39946 GN=ITPK4 PE=3 SV=1;	PF05770.13;PF17927.3	Ins134_P3_kin;Ins134_P3_kin_N	Inositol 1,3,4-trisphosphate 5/6-kinase ATP-grasp domain;Inositol 1,3,4-trisphosphate 5/6-kinase pre-ATP-grasp domain
TraesCS1B02G347000	6.9725	3.45083	1.01473	-	GO:0008360;GO:0007015;GO:0030865;GO:0007163;GO:0007264;GO:0032956;GO:0005737;GO:0005856;GO:0042995;GO:0043231;GO:0031410;GO:0005634;GO:0016020;GO:0005622;GO:0005938;GO:0005886;GO:0003924;GO:0019901;GO:000552	BP:regulation of cell shape;BP:actin filament organization;BP:cortical cytoskeleton organization;BP:establishment or maintenance of cell polarity;BP:small GTPase mediated signal transduction;BP:regulation of actin cytoskeleton organization;CC:cytoplasm;CC:cytoskeleton;CC:cell projection;CC:intracellular membrane-bounded organelle;CC:cytoplasmic vesicle;CC:nucleus;CC:membrane;CC:intracellular;CC:c…	K04392	RAC1	map04145	Phagosome	COG1100	S:Function unknown	XP_020169314.1	rac-like GTP-binding protein 2 [Aegilops tauschii subsp. strangulata]	sp|Q68Y52|RAC2_ORYSJ;	Rac-like GTP-binding protein 2 OS=Oryza sativa subsp. japonica OX=39947 GN=RAC2 PE=2 SV=1;	PF00071.24;PF08477.15;PF00025.23	Ras;Roc;Arf	Ras family;Ras of Complex, Roc, domain of DAPkinase;ADP-ribosylation factor family
TraesCS1B02G347100	5.9275	2.03333	1.54358	Non-specific serine/threonine protein kinase [Source:UniProtKB/TrEMBL;Acc:A0A341P7W1]	GO:0006468;GO:0007165;GO:0016021;GO:0005524;GO:0004672;GO:0106311;GO:010631	BP:protein phosphorylation;BP:signal transduction;CC:integral component of membrane;MF:ATP binding;MF:protein kinase activity;MF:old GO;MF:old GO;	------	------	------	------	COG0515	T:Signal transduction mechanisms	XP_037472892.1	CBL-interacting protein kinase 19-like [Triticum dicoccoides]	sp|Q68Y49|CIPKJ_ORYSJ;	CBL-interacting protein kinase 19 OS=Oryza sativa subsp. japonica OX=39947 GN=CIPK19 PE=1 SV=1;	PF00069.27;PF07714.19;PF03822.16;PF03109.18;PF14531.8;PF01163.24	Pkinase;PK_Tyr_Ser-Thr;NAF;ABC1;Kinase-like;RIO1	Protein kinase domain;Protein tyrosine and serine/threonine kinase;NAF domain;ABC1 atypical kinase-like domain;Kinase-like;RIO1 family
TraesCS1B02G348000	1.17167	5.49417	-2.22934	-	GO:0032259;GO:0016021;GO:0008168;GO:0008171;GO:004698	BP:methylation;CC:integral component of membrane;MF:methyltransferase activity;MF:O-methyltransferase activity;MF:protein dimerization activity;	------	------	------	------	ENOG410XS7T	S:Function unknown	KAF6991095.1	hypothetical protein CFC21_008213 [Triticum aestivum]	sp|P47917|ZRP4_MAIZE;	O-methyltransferase ZRP4 OS=Zea mays OX=4577 GN=ZRP4 PE=2 SV=1;	PF00891.20;PF08100.13	Methyltransf_2;Dimerisation	O-methyltransferase domain;Dimerisation domain
TraesCS1B02G348100	0.230833	1.52083	-2.71994	-	GO:0032259;GO:0008168;GO:0046983;GO:000817	BP:methylation;MF:methyltransferase activity;MF:protein dimerization activity;MF:O-methyltransferase activity;	------	------	------	------	ENOG410XS7T	S:Function unknown	KAF6991096.1	hypothetical protein CFC21_008214 [Triticum aestivum]	sp|P47917|ZRP4_MAIZE;	O-methyltransferase ZRP4 OS=Zea mays OX=4577 GN=ZRP4 PE=2 SV=1;	PF00891.20;PF08100.13	Methyltransf_2;Dimerisation	O-methyltransferase domain;Dimerisation domain
TraesCS1B02G351200	18.1142	9.17833	0.980814	-	GO:0005634;GO:000367	CC:nucleus;MF:DNA binding;	------	------	------	------	ENOG410YVV0;ENOG410YKTU	S:Function unknown;	XP_037472922.1	VQ motif-containing protein 4-like [Triticum dicoccoides]	sp|Q5M750|VQ4_ARATH;	VQ motif-containing protein 4 OS=Arabidopsis thaliana OX=3702 GN=VQ4 PE=1 SV=1;	PF05678.16	VQ	VQ motif
TraesCS1B02G352000	0.704167	2.03917	-1.53399	-	------	------	------	------	------	------	ENOG410YC9T;ENOG410Y4T4	S:Function unknown;	XP_037472933.1	uncharacterized protein LOC119349025 [Triticum dicoccoides]	------	------	PF04720.14	PDDEXK_6	PDDEXK-like family of unknown function
TraesCS1B02G352400	126.23	2.34333	5.75135	-	GO:0019538;GO:0034605;GO:0005737;GO:0016887;GO:000552	BP:protein metabolic process;BP:cellular response to heat;CC:cytoplasm;MF:ATPase activity;MF:ATP binding;	K03695	clpB	------	------	COG0542	O:Posttranslational modification, protein turnover, chaperones	KAF6991146.1	hypothetical protein CFC21_008259 [Triticum aestivum]	sp|Q6F2Y7|CLPB1_ORYSJ;	Chaperone protein ClpB1 OS=Oryza sativa subsp. japonica OX=39947 GN=CLPB1 PE=2 SV=1;	PF07724.16;PF17871.3;PF00004.31;PF10431.11;PF02861.22;PF07728.16;PF13401.8;PF13191.8;PF00158.28;PF20030.1;PF12775.9;PF05621.13	AAA_2;AAA_lid_9;AAA;ClpB_D2-small;Clp_N;AAA_5;AAA_22;AAA_16;Sigma54_activat;bpMoxR;AAA_7;TniB	AAA domain;AAA lid domain;ATPase family associated with various cellular activities;C-terminal, D2-small domain, of ClpB protein;Clp amino terminal domain, pathogenicity island component;AAA domain;AAA domain;AAA ATPase domain;Sigma-54 interaction domain;MoxR domain in the MoxR-vWA-beta-propeller ternary systems;P-loop containing dynein motor region;Bacterial TniB protein
TraesCS1B02G355700	19.8883	6.035	1.7205	-	GO:0006468;GO:0016021;GO:0004674;GO:0005515;GO:0004672;GO:000552	BP:protein phosphorylation;CC:integral component of membrane;MF:protein serine/threonine kinase activity;MF:protein binding;MF:protein kinase activity;MF:ATP binding;	------	------	------	------	COG4886	S:Function unknown	XP_037472961.1	receptor-like protein kinase HSL1 [Triticum dicoccoides]	sp|Q9M0G7|MIK1_ARATH;	MDIS1-interacting receptor like kinase 1 OS=Arabidopsis thaliana OX=3702 GN=MIK1 PE=1 SV=1;	PF07714.19;PF13855.8;PF00069.27;PF12799.9;PF08263.14	PK_Tyr_Ser-Thr;LRR_8;Pkinase;LRR_4;LRRNT_2	Protein tyrosine and serine/threonine kinase;Leucine rich repeat;Protein kinase domain;Leucine Rich repeats;Leucine rich repeat N-terminal domain
TraesCS1B02G356300	1.39917	0.288333	2.27876	-	GO:0055085;GO:0016021;GO:0140359;GO:0042626;GO:000552	BP:transmembrane transport;CC:integral component of membrane;MF:ABC-type transmembrane transporter activity;MF:ATPase activity, coupled to transmembrane movement of substances;MF:ATP binding;	------	------	------	------	COG1131	V:Defense mechanisms	KAF6991189.1	hypothetical protein CFC21_008299 [Triticum aestivum]	sp|Q9STT5|AB7A_ARATH;	ABC transporter A family member 7 OS=Arabidopsis thaliana OX=3702 GN=ABCA7 PE=3 SV=2;	PF00005.29;PF12698.9;PF13304.8	ABC_tran;ABC2_membrane_3;AAA_21	ABC transporter;ABC-2 family transporter protein;AAA domain, putative AbiEii toxin, Type IV TA system
TraesCS1B02G358800	0.660833	0.1575	2.06893	-	GO:0006468;GO:0016021;GO:0004674;GO:0005515;GO:0004672;GO:000552	BP:protein phosphorylation;CC:integral component of membrane;MF:protein serine/threonine kinase activity;MF:protein binding;MF:protein kinase activity;MF:ATP binding;	------	------	------	------	COG0515	T:Signal transduction mechanisms	KAF6991214.1	hypothetical protein CFC21_008324 [Triticum aestivum]	sp|O64556|Y2923_ARATH;	Putative leucine-rich repeat receptor-like serine/threonine-protein kinase At2g19230 OS=Arabidopsis thaliana OX=3702 GN=At2g19230 PE=1 SV=3;	PF12819.9;PF07714.19;PF00069.27;PF13855.8;PF12799.9	Malectin_like;PK_Tyr_Ser-Thr;Pkinase;LRR_8;LRR_4	Malectin-like domain;Protein tyrosine and serine/threonine kinase;Protein kinase domain;Leucine rich repeat;Leucine Rich repeats
TraesCS1B02G359400	0.7075	1.97583	-1.48166	-	GO:0006468;GO:0016021;GO:0004674;GO:0005515;GO:0004672;GO:000552	BP:protein phosphorylation;CC:integral component of membrane;MF:protein serine/threonine kinase activity;MF:protein binding;MF:protein kinase activity;MF:ATP binding;	------	------	------	------	COG0515	T:Signal transduction mechanisms	KAF6991223.1	hypothetical protein CFC21_008330 [Triticum aestivum]	sp|Q9FZB1|Y5188_ARATH;	Probable LRR receptor-like serine/threonine-protein kinase At1g51880 OS=Arabidopsis thaliana OX=3702 GN=At1g51880 PE=2 SV=1;	PF12819.9;PF00069.27;PF07714.19;PF13855.8;PF12799.9	Malectin_like;Pkinase;PK_Tyr_Ser-Thr;LRR_8;LRR_4	Malectin-like domain;Protein kinase domain;Protein tyrosine and serine/threonine kinase;Leucine rich repeat;Leucine Rich repeats
TraesCS1B02G359900	0.521667	1.275	-1.2893	-	GO:0006468;GO:0016021;GO:0004674;GO:0005524;GO:000467	BP:protein phosphorylation;CC:integral component of membrane;MF:protein serine/threonine kinase activity;MF:ATP binding;MF:protein kinase activity;	------	------	------	------	COG0515	T:Signal transduction mechanisms	KAF6991229.1	hypothetical protein CFC21_008335 [Triticum aestivum]	sp|O65924|Y2921_ARATH;	Putative leucine-rich repeat receptor-like protein kinase At2g19210 OS=Arabidopsis thaliana OX=3702 GN=At2g19210 PE=1 SV=1;	PF07714.19;PF00069.27;PF12819.9;PF03109.18	PK_Tyr_Ser-Thr;Pkinase;Malectin_like;ABC1	Protein tyrosine and serine/threonine kinase;Protein kinase domain;Malectin-like domain;ABC1 atypical kinase-like domain
TraesCS1B02G361200	0.315833	0.020833	3.92222	-	GO:001602	CC:integral component of membrane;	------	------	------	------	ENOG4110485	S:Function unknown	KAF6991239.1	hypothetical protein CFC21_008346 [Triticum aestivum]	------	------	PF03168.15	LEA_2	Late embryogenesis abundant protein
TraesCS1B02G362600	13.1225	6.51083	1.01113	-	GO:0046658;GO:000905	CC:anchored component of plasma membrane;MF:electron carrier activity;	------	------	------	------	ENOG410YW92	S:Function unknown	XP_037441825.1	early nodulin-like protein 1 [Triticum dicoccoides]	sp|Q9SK27|ENL1_ARATH;	Early nodulin-like protein 1 OS=Arabidopsis thaliana OX=3702 GN=At2g25060 PE=2 SV=2;	PF02298.19	Cu_bind_like	Plastocyanin-like domain
TraesCS1B02G365800	1.16583	2.9775	-1.35274	-	GO:007194	CC:cell periphery;	------	------	------	------	ENOG410ZDC2	S:Function unknown	XP_037441945.1	non-classical arabinogalactan protein 31-like [Triticum dicoccoides]	sp|Q9FZA2|AGP31_ARATH;	Non-classical arabinogalactan protein 31 OS=Arabidopsis thaliana OX=3702 GN=AGP31 PE=1 SV=1;	PF01190.19	Pollen_Ole_e_1	Pollen protein Ole e 1 like
TraesCS1B02G370900	11.0717	3.68	1.58909	-	GO:000550	MF:calcium ion binding;	K06268	PPP3R, CNB	------	------	COG5126;COG5126;COG5126	D:Cell cycle control, cell division, chromosome partitioning;T:Signal transduction mechanisms;Z:Cytoskeleton	VAH21757.1	unnamed protein product [Triticum turgidum subsp. durum]	sp|Q75KU4|CNBL4_ORYSJ;	Calcineurin B-like protein 4 OS=Oryza sativa subsp. japonica OX=39947 GN=CBL4 PE=1 SV=1;	PF00036.34;PF13405.8;PF13499.8;PF13202.8	EF-hand_1;EF-hand_6;EF-hand_7;EF-hand_5	EF hand;EF-hand domain;EF-hand domain pair;EF hand
TraesCS1B02G374700	2.47333	0.43	2.52405	-	GO:0006355;GO:0005634;GO:0003700;GO:004356	BP:regulation of transcription, DNA-templated;CC:nucleus;MF:transcription factor activity, sequence-specific DNA binding;MF:sequence-specific DNA binding;	------	------	------	------	ENOG410YQZM	K:Transcription	KAF6991388.1	hypothetical protein CFC21_008474 [Triticum aestivum]	sp|Q8VWQ5|WRK50_ARATH;	Probable WRKY transcription factor 50 OS=Arabidopsis thaliana OX=3702 GN=WRKY50 PE=2 SV=1;	PF03106.17	WRKY	WRKY DNA -binding domain
TraesCS1B02G374900	13.1108	4.0525	1.69388	-	GO:0006355;GO:0005634;GO:0003700;GO:004356	BP:regulation of transcription, DNA-templated;CC:nucleus;MF:transcription factor activity, sequence-specific DNA binding;MF:sequence-specific DNA binding;	------	------	------	------	ENOG410YQZM	K:Transcription	KAF6991390.1	hypothetical protein CFC21_008476 [Triticum aestivum]	sp|Q8VWQ5|WRK50_ARATH;	Probable WRKY transcription factor 50 OS=Arabidopsis thaliana OX=3702 GN=WRKY50 PE=2 SV=1;	PF03106.17	WRKY	WRKY DNA -binding domain
TraesCS1B02G375400	1.9225	0.8425	1.19024	-	GO:0006468;GO:0070816;GO:0032968;GO:0000307;GO:0005634;GO:0004674;GO:0004672;GO:0004693;GO:0008353;GO:000552	BP:protein phosphorylation;BP:phosphorylation of RNA polymerase II C-terminal domain;BP:positive regulation of transcription elongation from RNA polymerase II promoter;CC:cyclin-dependent protein kinase holoenzyme complex;CC:nucleus;MF:protein serine/threonine kinase activity;MF:protein kinase activity;MF:cyclin-dependent protein serine/threonine kinase activity;MF:RNA polymerase II carboxy-termi…	K08818	CDC2L	------	------	ENOG410XQ50	T:Signal transduction mechanisms	XP_037473140.1	putative cyclin-dependent kinase F-2 [Triticum dicoccoides]	sp|Q2QSL4|CDKF2_ORYSJ;	Putative cyclin-dependent kinase F-2 OS=Oryza sativa subsp. japonica OX=39947 GN=CDKF-2 PE=3 SV=1;	PF00069.27;PF07714.19;PF01636.25;PF03109.18;PF06293.16	Pkinase;PK_Tyr_Ser-Thr;APH;ABC1;Kdo	Protein kinase domain;Protein tyrosine and serine/threonine kinase;Phosphotransferase enzyme family;ABC1 atypical kinase-like domain;Lipopolysaccharide kinase
TraesCS1B02G380600	1.29333	2.86667	-1.14828	-	GO:0016021;GO:0016020;GO:003122	CC:integral component of membrane;CC:membrane;CC:anchored component of membrane;	------	------	------	------	------	------	KAF6991448.1	hypothetical protein CFC21_008532 [Triticum aestivum]	------	------	------	------	------
TraesCS1B02G381500	1.94083	0.3925	2.30591	ABA inducible protein [Source:UniProtKB/TrEMBL;Acc:Q7XAP5]	------	------	------	------	------	------	ENOG410Y2SY	S:Function unknown	VAH21812.1	unnamed protein product [Triticum turgidum subsp. durum]	sp|P14928|LEA1_HORVU;	ABA-inducible protein PHV A1 OS=Hordeum vulgare OX=4513 GN=HVA1 PE=2 SV=1;	PF02987.18	LEA_4	Late embryogenesis abundant protein
TraesCS1B02G381800	3.28	1.06333	1.6251	-	------	------	------	------	------	------	------	------	------	------	------	------	PF02987.18	LEA_4	Late embryogenesis abundant protein
TraesCS1B02G382800	4.11667	11.5208	-1.4847	-	GO:0005975;GO:0005618;GO:000465	BP:carbohydrate metabolic process;CC:cell wall;MF:polygalacturonase activity;	K01213	E3.2.1.67	map00040	Pentose and glucuronate interconversions	COG5434	M:Cell wall/membrane/envelope biogenesis	KAF6991478.1	hypothetical protein CFC21_008556 [Triticum aestivum]	sp|Q94AJ5|PGLR5_ARATH;	Probable polygalacturonase At1g80170 OS=Arabidopsis thaliana OX=3702 GN=At1g80170 PE=1 SV=1;	PF00295.19	Glyco_hydro_28	Glycosyl hydrolases family 28
TraesCS1B02G388700	9.21167	23.2025	-1.33275	-	GO:0006656;GO:0032259;GO:0016021;GO:0008168;GO:000023	BP:phosphatidylcholine biosynthetic process;BP:methylation;CC:integral component of membrane;MF:methyltransferase activity;MF:phosphoethanolamine N-methyltransferase activity;	K05929	E2.1.1.103, NMT	map00564	Glycerophospholipid metabolism	ENOG410XP5G	S:Function unknown	XP_037473235.1	phosphomethylethanolamine N-methyltransferase-like isoform X1 [Triticum dicoccoides]	sp|Q944H0|PEAM2_ARATH;	Phosphomethylethanolamine N-methyltransferase OS=Arabidopsis thaliana OX=3702 GN=NMT2 PE=1 SV=2;	PF08241.14;PF13649.8;PF13847.8;PF13489.8;PF08242.14;PF01209.20;PF02353.22;PF01739.20;PF05891.14;PF03848.16;PF05175.16;PF07021.14;PF01135.21;PF00891.20;PF08003.13	Methyltransf_11;Methyltransf_25;Methyltransf_31;Methyltransf_23;Methyltransf_12;Ubie_methyltran;CMAS;CheR;Methyltransf_PK;TehB;MTS;MetW;PCMT;Methyltransf_2;Methyltransf_9	Methyltransferase domain;Methyltransferase domain;Methyltransferase domain;Methyltransferase domain;Methyltransferase domain;ubiE/COQ5 methyltransferase family;Mycolic acid cyclopropane synthetase;CheR methyltransferase, SAM binding domain;AdoMet dependent proline di-methyltransferase;Tellurite resistance protein TehB;Methyltransferase small domain;Methionine biosynthesis protein MetW;Protein-L-i…
TraesCS1B02G396000	107.738	7.02833	3.93821	-	GO:0006355;GO:0006357;GO:0034605;GO:0005634;GO:0043565;GO:0003700;GO:0000978;GO:004280	BP:regulation of transcription, DNA-templated;BP:regulation of transcription from RNA polymerase II promoter;BP:cellular response to heat;CC:nucleus;MF:sequence-specific DNA binding;MF:transcription factor activity, sequence-specific DNA binding;MF:RNA polymerase II core promoter proximal region sequence-specific DNA binding;MF:identical protein binding;	K09419;K08967	HSFF;mtnD, mtnZ, ADI1	map00270	Cysteine and methionine metabolism	COG5169	K:Transcription	KAF6991613.1	hypothetical protein CFC21_008682 [Triticum aestivum]	sp|Q338B0|HFA2C_ORYSJ;	Heat stress transcription factor A-2c OS=Oryza sativa subsp. japonica OX=39947 GN=HSFA2C PE=1 SV=2;	PF00447.19	HSF_DNA-bind	HSF-type DNA-binding
TraesCS1B02G397700	0.8625	3.3925	-1.97575	-	------	------	------	------	------	------	ENOG41108U8	S:Function unknown	KAF6991628.1	hypothetical protein CFC21_008693 [Triticum aestivum]	------	------	------	------	------
TraesCS1B02G399100	0.428333	0.086667	2.30518	Glycosyltransferase [Source:UniProtKB/TrEMBL;Acc:A0A1D5SAG6]	GO:0016758;GO:0008194;GO:0080044;GO:008004	MF:transferase activity, transferring hexosyl groups;MF:UDP-glycosyltransferase activity;MF:quercetin 7-O-glucosyltransferase activity;MF:quercetin 3-O-glucosyltransferase activity;	------	------	------	------	COG1819	S:Function unknown	KAF6991646.1	hypothetical protein CFC21_008710 [Triticum aestivum]	sp|A0A193AUF6|GGT23_PUNGR;	Gallate 1-beta-glucosyltransferase 84A23 OS=Punica granatum OX=22663 GN=UGT84A23 PE=1 SV=1;	PF00201.20;PF04101.18	UDPGT;Glyco_tran_28_C	UDP-glucoronosyl and UDP-glucosyl transferase;Glycosyltransferase family 28 C-terminal domain
TraesCS1B02G401700	16.8175	6.72417	1.32254	-	GO:000367	MF:DNA binding;	K09422	MYBP	------	------	COG5147	K:Transcription	XP_037473353.1	transcription factor MYB4-like [Triticum dicoccoides]	sp|Q9M2Y9|RAX3_ARATH;	Transcription factor RAX3 OS=Arabidopsis thaliana OX=3702 GN=RAX3 PE=2 SV=1;	PF00249.33;PF13921.8	Myb_DNA-binding;Myb_DNA-bind_6	Myb-like DNA-binding domain;Myb-like DNA-binding domain
TraesCS1B02G403900	21.4267	5.16417	2.0528	-	------	------	------	------	------	------	ENOG41106KF	S:Function unknown	KAF6991701.1	hypothetical protein CFC21_008757 [Triticum aestivum]	------	------	------	------	------
TraesCS1B02G408300	1.36667	4.51	-1.72247	-	GO:0006468;GO:0007166;GO:0016021;GO:0005886;GO:0030247;GO:0004674;GO:0005509;GO:000552	BP:protein phosphorylation;BP:cell surface receptor signaling pathway;CC:integral component of membrane;CC:plasma membrane;MF:polysaccharide binding;MF:protein serine/threonine kinase activity;MF:calcium ion binding;MF:ATP binding;	------	------	------	------	COG0515	T:Signal transduction mechanisms	XP_037473383.1	wall-associated receptor kinase 1-like [Triticum dicoccoides]	sp|Q39191|WAK1_ARATH;	Wall-associated receptor kinase 1 OS=Arabidopsis thaliana OX=3702 GN=WAK1 PE=1 SV=2;	------	------	------
TraesCS1B02G410300	0.798333	0.149167	2.42006	-	GO:001649	MF:oxidoreductase activity;	K08081	TR1	map00960	Tropane, piperidine and pyridine alkaloid biosynthesis	COG1028	S:Function unknown	KAF6991779.1	hypothetical protein CFC21_008828 [Triticum aestivum]	sp|Q9LHT0|TRNHF_ARATH;	Tropinone reductase homolog At5g06060 OS=Arabidopsis thaliana OX=3702 GN=At5g06060 PE=2 SV=1;	PF13561.8;PF00106.27;PF08659.12;PF03154.17	adh_short_C2;adh_short;KR;Atrophin-1	Enoyl;short chain dehydrogenase;KR domain;Atrophin-1 family
TraesCS1B02G412100	1.4175	5.52917	-1.96371	-	GO:0055114;GO:0016021;GO:004687	BP:oxidation-reduction process;CC:integral component of membrane;MF:metal ion binding;	------	------	------	------	ENOG410XR70	S:Function unknown	KAF6991801.1	hypothetical protein CFC21_008847 [Triticum aestivum]	sp|Q9M363|B561I_ARATH;	Cytochrome b561 and DOMON domain-containing protein At3g61750 OS=Arabidopsis thaliana OX=3702 GN=At3g61750 PE=3 SV=1;	PF03351.19;PF03188.18	DOMON;Cytochrom_B561	DOMON domain;Eukaryotic cytochrome b561
TraesCS1B02G413900	8.46167	3.26083	1.3757	-	GO:0016021;GO:0016020;GO:0008375;GO:001675	CC:integral component of membrane;CC:membrane;MF:acetylglucosaminyltransferase activity;MF:transferase activity, transferring glycosyl groups;	------	------	------	------	ENOG410YEMA	S:Function unknown	KAF6991819.1	hypothetical protein CFC21_008868 [Triticum aestivum]	sp|Q65XS5|BC10_ORYSJ;	Glycosyltransferase BC10 OS=Oryza sativa subsp. japonica OX=39947 GN=BC10 PE=1 SV=1;	PF02485.23	Branch	Core-2/I-Branching enzyme
TraesCS1B02G417900	1.28417	3.3675	-1.39085	-	GO:000370	MF:transcription factor activity, sequence-specific DNA binding;	------	------	------	------	ENOG410Z28R	S:Function unknown	KAF6991863.1	hypothetical protein CFC21_008913 [Triticum aestivum]	------	------	------	------	------
TraesCS1B02G422100	0.6775	3.34167	-2.30228	Purple acid phosphatase [Source:UniProtKB/TrEMBL;Acc:A0A341PB28]	GO:0016787;GO:0046872;GO:000399	MF:hydrolase activity;MF:metal ion binding;MF:acid phosphatase activity;	K22390	ACP7	------	------	COG1409	S:Function unknown	XP_037443463.1	nucleotide pyrophosphatase/phosphodiesterase-like [Triticum dicoccoides]	sp|Q5MAU8|PPA27_ARATH;	Probable inactive purple acid phosphatase 27 OS=Arabidopsis thaliana OX=3702 GN=PAP27 PE=2 SV=1;	PF17808.3;PF00149.30;PF14008.8;PF16656.7	fn3_PAP;Metallophos;Metallophos_C;Pur_ac_phosph_N	Fn3-like domain from Purple Acid Phosphatase;Calcineurin-like phosphoesterase;Iron/zinc purple acid phosphatase-like protein C;Purple acid Phosphatase, N-terminal domain
TraesCS1B02G423600	47.5817	5.90667	3.00999	-	GO:0051085;GO:0006457;GO:0005829;GO:0051087;GO:005108	BP:chaperone mediated protein folding requiring cofactor;BP:protein folding;CC:cytosol;MF:chaperone binding;MF:unfolded protein binding;	K09510	DNAJB4	------	------	COG0484	O:Posttranslational modification, protein turnover, chaperones	KAF6991923.1	hypothetical protein CFC21_008971 [Triticum aestivum]	sp|Q9UDY4|DNJB4_HUMAN;	DnaJ homolog subfamily B member 4 OS=Homo sapiens OX=9606 GN=DNAJB4 PE=1 SV=1;	PF01556.20;PF00226.33	DnaJ_C;DnaJ	DnaJ C terminal domain;DnaJ domain
TraesCS1B02G424900	17.3275	55.9233	-1.69039	-	GO:0009409;GO:0009834;GO:0016021;GO:000588	BP:response to cold;BP:plant-type secondary cell wall biogenesis;CC:integral component of membrane;CC:plasma membrane;	------	------	------	------	ENOG410YJJE	M:Cell wall/membrane/envelope biogenesis	XP_037473474.1	fasciclin-like arabinogalactan protein 11 [Triticum dicoccoides]	sp|Q8LEJ6|FLA11_ARATH;	Fasciclin-like arabinogalactan protein 11 OS=Arabidopsis thaliana OX=3702 GN=FLA11 PE=2 SV=2;	PF02469.24	Fasciclin	Fasciclin domain
TraesCS1B02G425000	20.4008	48.4183	-1.24693	-	GO:0009834;GO:000588	BP:plant-type secondary cell wall biogenesis;CC:plasma membrane;	------	------	------	------	ENOG41108S6	S:Function unknown	XP_037473475.1	fasciclin-like arabinogalactan protein 12 [Triticum dicoccoides]	sp|Q8LEJ6|FLA11_ARATH;	Fasciclin-like arabinogalactan protein 11 OS=Arabidopsis thaliana OX=3702 GN=FLA11 PE=2 SV=2;	PF02469.24;PF11067.10	Fasciclin;DUF2868	Fasciclin domain;Protein of unknown function
TraesCS1B02G428000	1.40667	3.915	-1.47673	-	GO:0055114;GO:0016021;GO:0020037;GO:001649	BP:oxidation-reduction process;CC:integral component of membrane;MF:heme binding;MF:oxidoreductase activity;	------	------	------	------	ENOG4111TB6	S:Function unknown	KAF6991983.1	hypothetical protein CFC21_009022 [Triticum aestivum]	sp|O80854|B561L_ARATH;	Cytochrome b561 domain-containing protein At2g30890 OS=Arabidopsis thaliana OX=3702 GN=At2g30890 PE=2 SV=1;	PF03188.18	Cytochrom_B561	Eukaryotic cytochrome b561
TraesCS1B02G429200	1.32833	0.504167	1.39764	-	GO:0009536;GO:0016491;GO:0003824;GO:0050661;GO:005128	CC:plastid;MF:oxidoreductase activity;MF:catalytic activity;MF:NADP binding;MF:NAD binding;	------	------	------	------	ENOG410XQET	S:Function unknown	KAF6991998.1	hypothetical protein CFC21_009037 [Triticum aestivum]	sp|P51373|YCF23_PORPU;	Uncharacterized protein ycf23 OS=Porphyra purpurea OX=2787 GN=ycf23 PE=3 SV=1;	PF04481.14	DUF561	Protein of unknown function
TraesCS1B02G430400	3.25583	0.2125	3.93749	-	GO:000551	MF:protein binding;	------	------	------	------	ENOG41106GW	S:Function unknown	KAF6992013.1	hypothetical protein CFC21_009052 [Triticum aestivum]	------	------	PF12937.9	F-box-like	F-box-like
TraesCS1B02G430500	3.795	1.8725	1.01913	-	GO:0006468;GO:0016021;GO:0005524;GO:000467	BP:protein phosphorylation;CC:integral component of membrane;MF:ATP binding;MF:protein kinase activity;	------	------	------	------	COG0515	T:Signal transduction mechanisms	KAF6992014.1	hypothetical protein CFC21_009053 [Triticum aestivum]	sp|Q9SAH3|Y1887_ARATH;	Putative receptor-like protein kinase At1g80870 OS=Arabidopsis thaliana OX=3702 GN=At1g80870 PE=3 SV=1;	PF00069.27;PF07714.19;PF01636.25	Pkinase;PK_Tyr_Ser-Thr;APH	Protein kinase domain;Protein tyrosine and serine/threonine kinase;Phosphotransferase enzyme family
TraesCS1B02G431500	25.0683	49.9317	-0.994089	-	GO:0003824;GO:0047918;GO:005128	MF:catalytic activity;MF:GDP-mannose 3,5-epimerase activity;MF:NAD binding;	K10046	GME	map00520;map00053;map01240	Amino sugar and nucleotide sugar metabolism;Ascorbate and aldarate metabolism;Biosynthesis of cofactors	COG0451	M:Cell wall/membrane/envelope biogenesis	VAH10433.1	unnamed protein product [Triticum turgidum subsp. durum]	sp|A2Z7B3|GME1_ORYSI;	GDP-mannose 3,5-epimerase 1 OS=Oryza sativa subsp. indica OX=39946 GN=OsI_032456 PE=2 SV=1;	PF01370.23;PF16363.7;PF01073.21;PF07993.14;PF02719.17;PF13460.8	Epimerase;GDP_Man_Dehyd;3Beta_HSD;NAD_binding_4;Polysacc_synt_2;NAD_binding_10	NAD dependent epimerase/dehydratase family;GDP-mannose 4,6 dehydratase;3-beta hydroxysteroid dehydrogenase/isomerase family;Male sterility protein;Polysaccharide biosynthesis protein;NA
TraesCS1B02G437900	0.2725	0.0175	3.96083	-	GO:0016021;GO:000551	CC:integral component of membrane;MF:protein binding;	------	------	------	------	COG4886	S:Function unknown	KAF6992101.1	hypothetical protein CFC21_009128 [Triticum aestivum]	sp|Q9LP24|Y1571_ARATH;	Probable leucine-rich repeat receptor-like protein kinase At1g35710 OS=Arabidopsis thaliana OX=3702 GN=At1g35710 PE=1 SV=1;	PF12799.9;PF13855.8;PF08263.14	LRR_4;LRR_8;LRRNT_2	Leucine Rich repeats;Leucine rich repeat;Leucine rich repeat N-terminal domain
TraesCS1B02G438100	12.8325	5.96833	1.1044	-	GO:0006952;GO:0005524;GO:004353	BP:defense response;MF:ATP binding;MF:ADP binding;	------	------	------	------	------	------	KAF6992103.1	hypothetical protein CFC21_009130 [Triticum aestivum]	sp|P0DO07|PIK2_ORYSJ;	Disease resistance protein Pik-2 OS=Oryza sativa subsp. japonica OX=39947 GN=PIK-2 PE=3 SV=1;	PF13855.8	LRR_8	Leucine rich repeat
TraesCS1B02G440500	3.65083	1.51083	1.27288	-	GO:0006355;GO:0005634;GO:0003700;GO:0000976;GO:004356	BP:regulation of transcription, DNA-templated;CC:nucleus;MF:transcription factor activity, sequence-specific DNA binding;MF:transcription regulatory region sequence-specific DNA binding;MF:sequence-specific DNA binding;	------	------	------	------	ENOG41104H2	S:Function unknown	KAF6992134.1	hypothetical protein CFC21_009154 [Triticum aestivum]	sp|Q0DFT7|WRK19_ORYSJ;	Transcription factor WRKY19 OS=Oryza sativa subsp. japonica OX=39947 GN=WRKY19 PE=2 SV=1;	PF03106.17	WRKY	WRKY DNA -binding domain
TraesCS1B02G444700	4.58	1.16167	1.97915	-	------	------	------	------	------	------	ENOG410ZDQD;ENOG41107QD	S:Function unknown;	KAF6992180.1	hypothetical protein CFC21_009197 [Triticum aestivum]	------	------	------	------	------
TraesCS1B02G445200	0.181667	0.77	-2.08356	Hydroxyproline-rich glycoprotein family protein [Source:Projected from Arabidopsis thaliana (AT3G25690) UniProtKB/TrEMBL;Acc:A0A1I9LT48]	GO:0005576;GO:000517	CC:extracellular region;MF:hormone activity;	------	------	------	------	ENOG4111F63	S:Function unknown	KAF6992186.1	hypothetical protein CFC21_009202 [Triticum aestivum]	sp|Q9LI74|CHUP1_ARATH;	Protein CHUP1, chloroplastic OS=Arabidopsis thaliana OX=3702 GN=CHUP1 PE=1 SV=1;	------	------	------
TraesCS1B02G445300	0.626667	2.68083	-2.09691	-	GO:0006468;GO:0035556;GO:0106311;GO:0106310;GO:0005737;GO:0005634;GO:0004674;GO:0004707;GO:0005524;GO:000467	BP:protein phosphorylation;BP:intracellular signal transduction;BP:old GO;BP:old GO;CC:cytoplasm;CC:nucleus;MF:protein serine/threonine kinase activity;MF:MAP kinase activity;MF:ATP binding;MF:protein kinase activity;	------	------	------	------	ENOG410XNY0	T:Signal transduction mechanisms	XP_037473651.1	mitogen-activated protein kinase 17-like [Triticum dicoccoides]	sp|Q6L5F7|MPK17_ORYSJ;	Mitogen-activated protein kinase 17 OS=Oryza sativa subsp. japonica OX=39947 GN=MPK17 PE=2 SV=2;	PF00069.27;PF07714.19;PF06293.16	Pkinase;PK_Tyr_Ser-Thr;Kdo	Protein kinase domain;Protein tyrosine and serine/threonine kinase;Lipopolysaccharide kinase
TraesCS1B02G446400	6.55	2.79583	1.22822	-	GO:000550	MF:calcium ion binding;	K13448	CML	map04626	Plant-pathogen interaction	COG5126;COG5126;COG5126	D:Cell cycle control, cell division, chromosome partitioning;T:Signal transduction mechanisms;Z:Cytoskeleton	XP_037473657.1	probable calcium-binding protein CML14 [Triticum dicoccoides]	sp|Q6L5F4|CML14_ORYSJ;	Probable calcium-binding protein CML14 OS=Oryza sativa subsp. japonica OX=39947 GN=CML14 PE=2 SV=1;	PF00036.34;PF13499.8;PF13405.8;PF13833.8;PF13202.8;PF14658.8	EF-hand_1;EF-hand_7;EF-hand_6;EF-hand_8;EF-hand_5;EF-hand_9	EF hand;EF-hand domain pair;EF-hand domain;EF-hand domain pair;EF hand;EF-hand domain
TraesCS1B02G446900	2.72833	0	#DIV/0!	-	GO:0009061;GO:000697	BP:anaerobic respiration;BP:response to oxidative stress;	------	------	------	------	ENOG410YT9R	S:Function unknown	KAF6992204.1	hypothetical protein CFC21_009219 [Triticum aestivum]	------	------	------	------	------
TraesCS1B02G451800	4.82	1.86417	1.3705	-	------	------	------	------	------	------	ENOG4111BI0	S:Function unknown	KAF6992257.1	hypothetical protein CFC21_009269 [Triticum aestivum]	sp|Q9SD84|PDCB2_ARATH;	PLASMODESMATA CALLOSE-BINDING PROTEIN 2 OS=Arabidopsis thaliana OX=3702 GN=PDCB2 PE=1 SV=1;	PF07983.15	X8	X8 domain
TraesCS1B02G454400	3.27667	1.46	1.16626	-	GO:0006468;GO:0016021;GO:0005524;GO:000467	BP:protein phosphorylation;CC:integral component of membrane;MF:ATP binding;MF:protein kinase activity;	------	------	------	------	COG0515	T:Signal transduction mechanisms	KAF6992287.1	hypothetical protein CFC21_009293 [Triticum aestivum]	sp|Q0D5R3|CRK6_ORYSJ;	Cysteine-rich receptor-like protein kinase 6 OS=Oryza sativa subsp. japonica OX=39947 GN=CRK6 PE=1 SV=1;	PF00069.27;PF07714.19;PF01657.19	Pkinase;PK_Tyr_Ser-Thr;Stress-antifung	Protein kinase domain;Protein tyrosine and serine/threonine kinase;Salt stress response/antifungal
TraesCS1B02G455400	4.19833	1.4925	1.49209	-	GO:0016020;GO:000588	CC:membrane;CC:plasma membrane;	------	------	------	------	ENOG41107TS;ENOG41107Z3	S:Function unknown;	KAF6992298.1	hypothetical protein CFC21_009303 [Triticum aestivum]	------	------	------	------	------
TraesCS1B02G456100	0.215833	0.019167	3.49322	-	GO:0055085;GO:001602	BP:transmembrane transport;CC:integral component of membrane;	------	------	------	------	ENOG4111I0D	P:Inorganic ion transport and metabolism	KAF6992307.1	hypothetical protein CFC21_009313 [Triticum aestivum]	sp|Q9ASQ7|SLAH2_ARATH;	S-type anion channel SLAH2 OS=Arabidopsis thaliana OX=3702 GN=SLAH2 PE=2 SV=1;	PF03595.19	SLAC1	Voltage-dependent anion channel
TraesCS1B02G456200	23.5475	4.15917	2.50121	-	GO:0055085;GO:001602	BP:transmembrane transport;CC:integral component of membrane;	------	------	------	------	ENOG4111I0D	P:Inorganic ion transport and metabolism	KAF6992308.1	hypothetical protein CFC21_009314 [Triticum aestivum]	sp|Q9ASQ7|SLAH2_ARATH;	S-type anion channel SLAH2 OS=Arabidopsis thaliana OX=3702 GN=SLAH2 PE=2 SV=1;	PF03595.19	SLAC1	Voltage-dependent anion channel
TraesCS1B02G456400	0.170833	0.001667	6.67919	-	GO:0055085;GO:001602	BP:transmembrane transport;CC:integral component of membrane;	------	------	------	------	ENOG4111I0D	P:Inorganic ion transport and metabolism	KAF6992311.1	hypothetical protein CFC21_009317 [Triticum aestivum]	sp|Q9ASQ7|SLAH2_ARATH;	S-type anion channel SLAH2 OS=Arabidopsis thaliana OX=3702 GN=SLAH2 PE=2 SV=1;	PF03595.19	SLAC1	Voltage-dependent anion channel
TraesCS1B02G460700	8.87167	24.8892	-1.48824	-	GO:0055085;GO:0016021;GO:0016020;GO:0022857;GO:001529	BP:transmembrane transport;CC:integral component of membrane;CC:membrane;MF:transmembrane transporter activity;MF:symporter activity;	------	------	------	------	ENOG410XNQK	G:Carbohydrate transport and metabolism	KAF6992347.1	hypothetical protein CFC21_009345 [Triticum aestivum]	sp|Q9XIH7|PLT1_ARATH;	Putative polyol transporter 1 OS=Arabidopsis thaliana OX=3702 GN=PLT1 PE=3 SV=1;	PF00083.26;PF07690.18	Sugar_tr;MFS_1	Sugar;Major Facilitator Superfamily
TraesCS1B02G464800	1.08833	0.165	2.72158	-	GO:0016887;GO:000552	MF:ATPase activity;MF:ATP binding;	K08900	BCS1	------	------	COG0465	O:Posttranslational modification, protein turnover, chaperones	KAF6992391.1	hypothetical protein CFC21_009386 [Triticum aestivum]	sp|Q8VZG2|HSR4_ARATH;	Protein HYPER-SENSITIVITY-RELATED 4 OS=Arabidopsis thaliana OX=3702 GN=HSR4 PE=2 SV=1;	PF14363.8;PF00004.31;PF05496.14;PF13191.8;PF05673.15	AAA_assoc;AAA;RuvB_N;AAA_16;DUF815	Domain associated at C-terminal with AAA;ATPase family associated with various cellular activities;Holliday junction DNA helicase RuvB P-loop domain;AAA ATPase domain;Protein of unknown function
TraesCS1B02G464900	10.6567	1.48333	2.84484	-	GO:0016887;GO:000552	MF:ATPase activity;MF:ATP binding;	K08900	BCS1	------	------	COG0465	O:Posttranslational modification, protein turnover, chaperones	KAF6992392.1	hypothetical protein CFC21_009387 [Triticum aestivum]	sp|Q147F9|AATPC_ARATH;	AAA-ATPase At3g50940 OS=Arabidopsis thaliana OX=3702 GN=At3g50940 PE=2 SV=1;	PF14363.8;PF00004.31;PF05673.15;PF05496.14;PF00910.24;PF13191.8;PF13401.8	AAA_assoc;AAA;DUF815;RuvB_N;RNA_helicase;AAA_16;AAA_22	Domain associated at C-terminal with AAA;ATPase family associated with various cellular activities;Protein of unknown function;Holliday junction DNA helicase RuvB P-loop domain;RNA helicase;AAA ATPase domain;AAA domain
TraesCS1B02G466500	0.4825	0.233333	1.04814	-	GO:0006952;GO:0043531;GO:0005515;GO:000552	BP:defense response;MF:ADP binding;MF:protein binding;MF:ATP binding;	------	------	------	------	COG4886	S:Function unknown	KAF6992411.1	hypothetical protein CFC21_009403 [Triticum aestivum]	sp|Q7XA39|RGA4_SOLBU;	Putative disease resistance protein RGA4 OS=Solanum bulbocastanum OX=147425 GN=RGA4 PE=2 SV=1;	PF00931.24;PF18052.3;PF12799.9;PF13855.8	NB-ARC;Rx_N;LRR_4;LRR_8	NB-ARC domain;Rx N-terminal domain;Leucine Rich repeats;Leucine rich repeat
TraesCS1B02G470800	3.70083	13.06	-1.81923	-	------	------	------	------	------	------	COG0596	S:Function unknown	KAF6992476.1	hypothetical protein CFC21_009462 [Triticum aestivum]	sp|Q10J20|D14L_ORYSJ;	Probable esterase D14L OS=Oryza sativa subsp. japonica OX=39947 GN=D14L PE=1 SV=1;	PF12697.9;PF00561.22	Abhydrolase_6;Abhydrolase_1	Alpha/beta hydrolase family;alpha/beta hydrolase fold
TraesCS1D02G002900	0.085833	0	#DIV/0!	-	GO:0006468;GO:0016021;GO:0005524;GO:0005515;GO:000467	BP:protein phosphorylation;CC:integral component of membrane;MF:ATP binding;MF:protein binding;MF:protein kinase activity;	------	------	------	------	------	------	KAF6992623.1	hypothetical protein CFC21_009599 [Triticum aestivum]	sp|Q8VZG8|MIK2_ARATH;	MDIS1-interacting receptor like kinase 2 OS=Arabidopsis thaliana OX=3702 GN=MIK2 PE=1 SV=3;	PF13855.8;PF00069.27;PF12799.9;PF07714.19;PF08263.14	LRR_8;Pkinase;LRR_4;PK_Tyr_Ser-Thr;LRRNT_2	Leucine rich repeat;Protein kinase domain;Leucine Rich repeats;Protein tyrosine and serine/threonine kinase;Leucine rich repeat N-terminal domain
TraesCS1D02G005800	1.98667	0.168333	3.56096	-	GO:0032780;GO:0005747;GO:0005739;GO:004203	BP:negative regulation of ATPase activity;CC:mitochondrial respiratory chain complex I;CC:mitochondrion;MF:ATPase inhibitor activity;	K22255	ATPIF1	------	------	ENOG410ZGHI	S:Function unknown	XP_020149999.1	uncharacterized protein At2g27730, mitochondrial [Aegilops tauschii subsp. strangulata]	------	------	PF04568.14	IATP	Mitochondrial ATPase inhibitor, IATP
TraesCS1D02G006600	0.091667	0.865833	-3.23961	Dirigent protein [Source:UniProtKB/TrEMBL;Acc:A0A341PAT8]	GO:0048046;GO:003024	CC:apoplast;MF:carbohydrate binding;	------	------	------	------	ENOG41105GF	S:Function unknown	KAF6992633.1	hypothetical protein CFC21_009611 [Triticum aestivum]	sp|A2WMH2|GOS9_ORYSI;	Protein GOS9 OS=Oryza sativa subsp. indica OX=39946 GN=GOS9 PE=2 SV=1;	PF01419.19;PF03018.16	Jacalin;Dirigent	Jacalin-like lectin domain;Dirigent-like protein
TraesCS1D02G006900	1.26417	5.12917	-2.02054	-	------	------	------	------	------	------	------	------	KAF6992631.1	hypothetical protein CFC21_009609 [Triticum aestivum]	------	------	------	------	------
TraesCS1D02G010800	29.8792	10.8208	1.46533	-	GO:000551	MF:protein binding;	------	------	------	------	COG4886;ENOG410YB0Y	S:Function unknown;	KAF6992772.1	hypothetical protein CFC21_009735 [Triticum aestivum]	sp|Q9M5J9|PGIP1_ARATH;	Polygalacturonase inhibitor 1 OS=Arabidopsis thaliana OX=3702 GN=PGIP1 PE=1 SV=1;	PF13855.8;PF12799.9;PF08263.14	LRR_8;LRR_4;LRRNT_2	Leucine rich repeat;Leucine Rich repeats;Leucine rich repeat N-terminal domain
TraesCS1D02G012800	0.385833	0.030833	3.64543	-	GO:0006468;GO:0048544;GO:0016021;GO:0004674;GO:0106311;GO:0004672;GO:0005524;GO:010631	BP:protein phosphorylation;BP:recognition of pollen;CC:integral component of membrane;MF:protein serine/threonine kinase activity;MF:old GO;MF:protein kinase activity;MF:ATP binding;MF:old GO;	------	------	------	------	COG0515	T:Signal transduction mechanisms	KAF6992795.1	hypothetical protein CFC21_009756 [Triticum aestivum]	sp|O64477|Y2913_ARATH;	G-type lectin S-receptor-like serine/threonine-protein kinase At2g19130 OS=Arabidopsis thaliana OX=3702 GN=At2g19130 PE=2 SV=1;	PF00069.27;PF07714.19;PF01453.26;PF00954.22;PF08276.13	Pkinase;PK_Tyr_Ser-Thr;B_lectin;S_locus_glycop;PAN_2	Protein kinase domain;Protein tyrosine and serine/threonine kinase;D-mannose binding lectin;S-locus glycoprotein domain;PAN-like domain
TraesCS1D02G012900	0.259167	0.01	4.69581	Serine/threonine-protein kinase [Source:UniProtKB/TrEMBL;Acc:A0A1D5T2E8]	GO:0006468;GO:0048544;GO:0016021;GO:0004674;GO:0106311;GO:0004672;GO:0106310;GO:000552	BP:protein phosphorylation;BP:recognition of pollen;CC:integral component of membrane;MF:protein serine/threonine kinase activity;MF:old GO;MF:protein kinase activity;MF:old GO;MF:ATP binding;	------	------	------	------	COG0515	T:Signal transduction mechanisms	KAF6992796.1	hypothetical protein CFC21_009757 [Triticum aestivum]	sp|O64477|Y2913_ARATH;	G-type lectin S-receptor-like serine/threonine-protein kinase At2g19130 OS=Arabidopsis thaliana OX=3702 GN=At2g19130 PE=2 SV=1;	PF00069.27;PF07714.19;PF01453.26;PF08276.13;PF00954.22	Pkinase;PK_Tyr_Ser-Thr;B_lectin;PAN_2;S_locus_glycop	Protein kinase domain;Protein tyrosine and serine/threonine kinase;D-mannose binding lectin;PAN-like domain;S-locus glycoprotein domain
TraesCS1D02G013700	0.27	0.006667	5.33978	-	GO:0006633;GO:0031408;GO:0003824;GO:0016491;GO:001018	BP:fatty acid biosynthetic process;BP:oxylipin biosynthetic process;MF:catalytic activity;MF:oxidoreductase activity;MF:FMN binding;	K05894	OPR	map00592	alpha-Linolenic acid metabolism	COG1902	C:Energy production and conversion	XP_020180018.1	12-oxophytodienoate reductase 1 [Aegilops tauschii subsp. strangulata]	sp|Q84QK0|OPR1_ORYSJ;	12-oxophytodienoate reductase 1 OS=Oryza sativa subsp. japonica OX=39947 GN=OPR1 PE=2 SV=1;	PF00724.22	Oxidored_FMN	NAD
TraesCS1D02G015400	2.35333	0.605833	1.95771	-	GO:0006468;GO:0016310;GO:0016021;GO:0016020;GO:0016301;GO:0030247;GO:0000166;GO:0016740;GO:0004672;GO:000552	BP:protein phosphorylation;BP:phosphorylation;CC:integral component of membrane;CC:membrane;MF:kinase activity;MF:polysaccharide binding;MF:nucleotide binding;MF:transferase activity;MF:protein kinase activity;MF:ATP binding;	------	------	------	------	COG0515	T:Signal transduction mechanisms	KAF6992820.1	hypothetical protein CFC21_009780 [Triticum aestivum]	sp|P93604|LRK10_WHEAT;	Rust resistance kinase Lr10 OS=Triticum aestivum OX=4565 GN=LRK10 PE=2 SV=1;	PF00069.27;PF07714.19;PF13947.8	Pkinase;PK_Tyr_Ser-Thr;GUB_WAK_bind	Protein kinase domain;Protein tyrosine and serine/threonine kinase;Wall-associated receptor kinase galacturonan-binding
TraesCS1D02G019400	0.499167	1.64833	-1.72341	-	GO:0016021;GO:0004497;GO:0016705;GO:0005506;GO:002003	CC:integral component of membrane;MF:monooxygenase activity;MF:oxidoreductase activity, acting on paired donors, with incorporation or reduction of molecular oxygen;MF:iron ion binding;MF:heme binding;	K09755	CYP84A, F5H	map00940	Phenylpropanoid biosynthesis	COG2124	Q:Secondary metabolites biosynthesis, transport and catabolism	KAF6992871.1	hypothetical protein CFC21_009824 [Triticum aestivum]	sp|Q42600|C84A1_ARATH;	Cytochrome P450 84A1 OS=Arabidopsis thaliana OX=3702 GN=CYP84A1 PE=1 SV=1;	PF00067.24	p450	Cytochrome P450
TraesCS1D02G022800	15.8933	50.8708	-1.67842	-	------	------	------	------	------	------	ENOG41105XW;ENOG41103Y2;ENOG41107DV	S:Function unknown;	XP_020198363.1	uncharacterized protein LOC109784175 [Aegilops tauschii subsp. strangulata]	------	------	PF06830.13	Root_cap	Root cap
TraesCS1D02G025700	1.11167	0.355833	1.64345	-	GO:0016021;GO:0016020;GO:000551	CC:integral component of membrane;CC:membrane;MF:protein binding;	------	------	------	------	COG0666	S:Function unknown	KAF6992939.1	hypothetical protein CFC21_009890 [Triticum aestivum]	sp|Q8LPS2|ACD6_ARATH;	Protein ACCELERATED CELL DEATH 6 OS=Arabidopsis thaliana OX=3702 GN=ACD6 PE=1 SV=1;	PF12796.9;PF13637.8;PF13857.8;PF00023.32;PF13962.8;PF13606.8	Ank_2;Ank_4;Ank_5;Ank;PGG;Ank_3	Ankyrin repeats;Ankyrin repeats;Ankyrin repeats;Ankyrin repeat;Domain of unknown function;Ankyrin repeat
TraesCS1D02G032400	0.1975	1.395	-2.82034	-	GO:001602	CC:integral component of membrane;	------	------	------	------	ENOG411047M	S:Function unknown	KAF6993014.1	hypothetical protein CFC21_009961 [Triticum aestivum]	sp|P0C042|Y4597_ARATH;	Uncharacterized protein At4g15970 OS=Arabidopsis thaliana OX=3702 GN=At4g15970 PE=2 SV=1;	PF03407.18	Nucleotid_trans	Nucleotide-diphospho-sugar transferase
TraesCS1D02G034800	497.172	156.272	1.66969	-	GO:0072593;GO:0071555;GO:0005618;GO:0005829;GO:0005576;GO:0016787;GO:004687	BP:reactive oxygen species metabolic process;BP:cell wall organization;CC:cell wall;CC:cytosol;CC:extracellular region;MF:hydrolase activity;MF:metal ion binding;	------	------	------	------	ENOG4110659	O:Posttranslational modification, protein turnover, chaperones	XP_020166377.1	metallothionein-like protein 2C [Aegilops tauschii subsp. strangulata]	sp|A2XZL0|MT2C_ORYSI;	Metallothionein-like protein 2C OS=Oryza sativa subsp. indica OX=39946 GN=MT2C PE=3 SV=1;	PF01439.20	Metallothio_2	Metallothionein
TraesCS1D02G036500	3.89167	1.50667	1.36903	-	GO:0006897;GO:0006900;GO:0072583;GO:0048268;GO:0005794;GO:0005905;GO:0030136;GO:0000149;GO:0005543;GO:0032050;GO:0005545;GO:0005546;GO:003027	BP:endocytosis;BP:membrane budding;BP:clathrin-dependent endocytosis;BP:clathrin coat assembly;CC:Golgi apparatus;CC:clathrin-coated pit;CC:clathrin-coated vesicle;MF:SNARE binding;MF:phospholipid binding;MF:clathrin heavy chain binding;MF:1-phosphatidylinositol binding;MF:phosphatidylinositol-4,5-bisphosphate binding;MF:clathrin binding;	------	------	------	------	ENOG410XQ90	U:Intracellular trafficking, secretion, and vesicular transport	XP_020167371.1	probable clathrin assembly protein At4g32285 [Aegilops tauschii subsp. strangulata]	sp|Q8S9J8|CAP1_ARATH;	Probable clathrin assembly protein At4g32285 OS=Arabidopsis thaliana OX=3702 GN=At4g32285 PE=1 SV=2;	PF07651.18	ANTH	ANTH domain
TraesCS1D02G039300	60.2708	23.9467	1.33164	-	GO:0006559;GO:0009800;GO:0005737;GO:0016841;GO:0003824;GO:004554	BP:L-phenylalanine catabolic process;BP:cinnamic acid biosynthetic process;CC:cytoplasm;MF:ammonia-lyase activity;MF:catalytic activity;MF:phenylalanine ammonia-lyase activity;	K10775	PAL	map00940;map00360	Phenylpropanoid biosynthesis;Phenylalanine metabolism	------	------	QAT18629.1	phenylalanine ammonia-lyase 3 [Triticum aestivum]	sp|Q43210|PALY_WHEAT;	Phenylalanine ammonia-lyase OS=Triticum aestivum OX=4565 GN=PAL PE=3 SV=1;	PF00221.21	Lyase_aromatic	Aromatic amino acid lyase
TraesCS1D02G046400	12.065	24.475	-1.02048	-	GO:004573	MF:nutrient reservoir activity;	------	------	------	------	ENOG410YDMX	S:Function unknown	XP_020196645.1	glutelin type-D 1 [Aegilops tauschii subsp. strangulata]	sp|Q6K508|GLUD1_ORYSJ;	Glutelin type-D 1 OS=Oryza sativa subsp. japonica OX=39947 GN=GLUD1 PE=2 SV=1;	PF00190.24;PF07883.13	Cupin_1;Cupin_2	Cupin;Cupin domain
TraesCS1D02G048300	0.749167	0.106667	2.81217	-	GO:0016021;GO:0004497;GO:0016705;GO:0005506;GO:002003	CC:integral component of membrane;MF:monooxygenase activity;MF:oxidoreductase activity, acting on paired donors, with incorporation or reduction of molecular oxygen;MF:iron ion binding;MF:heme binding;	------	------	------	------	COG2124	Q:Secondary metabolites biosynthesis, transport and catabolism	XP_020172641.1	geraniol 8-hydroxylase [Aegilops tauschii subsp. strangulata]	sp|D1MI46|C76BA_SWEMU;	Geraniol 8-hydroxylase OS=Swertia mussotii OX=137888 GN=CYP76B10 PE=1 SV=1;	PF00067.24	p450	Cytochrome P450
TraesCS1D02G050200	0.6275	0.11	2.51211	-	GO:0009755;GO:0016021;GO:0005886;GO:0004672;GO:0005515;GO:000552	BP:hormone-mediated signaling pathway;CC:integral component of membrane;CC:plasma membrane;MF:protein kinase activity;MF:protein binding;MF:ATP binding;	------	------	------	------	COG4886	S:Function unknown	KAF6993246.1	hypothetical protein CFC21_010164 [Triticum aestivum]	------	------	PF08263.14;PF13855.8;PF12799.9	LRRNT_2;LRR_8;LRR_4	Leucine rich repeat N-terminal domain;Leucine rich repeat;Leucine Rich repeats
TraesCS1D02G052000	0.3775	1.33	-1.81688	-	GO:0016021;GO:0016020;GO:0016887;GO:0005524;GO:004262	CC:integral component of membrane;CC:membrane;MF:ATPase activity;MF:ATP binding;MF:ATPase activity, coupled to transmembrane movement of substances;	------	------	------	------	COG1131	V:Defense mechanisms	KAF6993275.1	hypothetical protein CFC21_010191 [Triticum aestivum]	sp|Q8H8V7|AB5G_ORYSJ;	ABC transporter G family member 5 OS=Oryza sativa subsp. japonica OX=39947 GN=RCN1 PE=1 SV=1;	PF01061.26;PF00005.29;PF13191.8;PF13555.8;PF19055.2;PF12698.9;PF13481.8	ABC2_membrane;ABC_tran;AAA_16;AAA_29;ABC2_membrane_7;ABC2_membrane_3;AAA_25	ABC-2 type transporter;ABC transporter;AAA ATPase domain;P-loop containing region of AAA domain;ABC-2 type transporter;ABC-2 family transporter protein;AAA domain
TraesCS1D02G053500	37.6558	17.7208	1.08743	-	GO:0051131;GO:0006457;GO:0005634;GO:0005829;GO:0051087;GO:005187	BP:chaperone-mediated protein complex assembly;BP:protein folding;CC:nucleus;CC:cytosol;MF:chaperone binding;MF:Hsp90 protein binding;	------	------	------	------	ENOG41121RT	S:Function unknown	XP_020189891.1	co-chaperone protein p23-1 [Aegilops tauschii subsp. strangulata]	sp|Q9FR62|P23A_BRANA;	Co-chaperone protein p23-1 OS=Brassica napus OX=3708 GN=P23-1 PE=1 SV=1;	PF04969.18	CS	CS domain
TraesCS1D02G056500	0.963333	2.00667	-1.05869	-	GO:0005975;GO:000455	BP:carbohydrate metabolic process;MF:hydrolase activity, hydrolyzing O-glycosyl compounds;	------	------	------	------	ENOG4111BDN	G:Carbohydrate transport and metabolism	KAF6993319.1	hypothetical protein CFC21_010231 [Triticum aestivum]	sp|Q8L868|E1311_ARATH;	Glucan endo-1,3-beta-glucosidase 11 OS=Arabidopsis thaliana OX=3702 GN=At1g32860 PE=2 SV=1;	PF00332.20	Glyco_hydro_17	Glycosyl hydrolases family 17
TraesCS1D02G057300	10.7258	22.665	-1.07938	-	GO:0008152;GO:001679	BP:metabolic process;MF:hydrolase activity, acting on glycosyl bonds;	K01240	URH1	map00240;map00760	Pyrimidine metabolism;Nicotinate and nicotinamide metabolism	COG1957	F:Nucleotide transport and metabolism	KAF6993329.1	hypothetical protein CFC21_010238 [Triticum aestivum]	sp|Q652Q8|URH2_ORYSJ;	Probable uridine nucleosidase 2 OS=Oryza sativa subsp. japonica OX=39947 GN=URH2 PE=2 SV=1;	PF01156.21	IU_nuc_hydro	Inosine-uridine preferring nucleoside hydrolase
TraesCS1D02G057500	8.315	2.63583	1.65746	-	GO:0030001;GO:004687	BP:metal ion transport;MF:metal ion binding;	------	------	------	------	ENOG410Z7HP;ENOG410ZCT8	S:Function unknown;	XP_020198520.1	disease resistance protein Pik-1 [Aegilops tauschii subsp. strangulata]	sp|F2VYU4|PIK1_ORYSJ;	Disease resistance protein Pik-1 OS=Oryza sativa subsp. japonica OX=39947 GN=PIK-1 PE=1 SV=1;	PF00403.28	HMA	Heavy-metal-associated domain
TraesCS1D02G058700	14.9783	6.91	1.11612	-	------	------	------	------	------	------	ENOG410Z0US	S:Function unknown	KAF6993351.1	hypothetical protein CFC21_010257 [Triticum aestivum]	------	------	PF03763.15	Remorin_C	Remorin, C-terminal region
TraesCS1D02G059200	12.2867	24.6892	-1.00678	-	GO:0006355;GO:0006351;GO:0005634;GO:0003700;GO:000367	BP:regulation of transcription, DNA-templated;BP:transcription, DNA-templated;CC:nucleus;MF:transcription factor activity, sequence-specific DNA binding;MF:DNA binding;	K09284	AP2	------	------	ENOG410YD13	K:Transcription	KAF6993355.1	hypothetical protein CFC21_010261 [Triticum aestivum]	sp|B8AXC3|AP21_ORYSI;	APETALA2-like protein 1 OS=Oryza sativa subsp. indica OX=39946 GN=AP2-1 PE=2 SV=2;	PF00847.22	AP2	AP2 domain
TraesCS1D02G064200	0.398333	0.1775	1.16616	-	GO:0006952;GO:0005524;GO:004353	BP:defense response;MF:ATP binding;MF:ADP binding;	K13457	RPM1, RPS3	map04626	Plant-pathogen interaction	COG4886	S:Function unknown	KAF6993415.1	hypothetical protein CFC21_010313 [Triticum aestivum]	sp|Q39214|RPM1_ARATH;	Disease resistance protein RPM1 OS=Arabidopsis thaliana OX=3702 GN=RPM1 PE=1 SV=1;	PF00931.24;PF18052.3;PF13855.8;PF13401.8;PF13238.8;PF13191.8;PF13173.8	NB-ARC;Rx_N;LRR_8;AAA_22;AAA_18;AAA_16;AAA_14	NB-ARC domain;Rx N-terminal domain;Leucine rich repeat;AAA domain;AAA domain;AAA ATPase domain;AAA domain
TraesCS1D02G066800	0.926667	2.21167	-1.25501	-	------	------	------	------	------	------	ENOG410YYK6	S:Function unknown	KAF6993446.1	hypothetical protein CFC21_010338 [Triticum aestivum]	------	------	------	------	------
TraesCS1D02G072600	3.1625	1.01667	1.63722	-	GO:0006355;GO:0005634;GO:0003700;GO:004356	BP:regulation of transcription, DNA-templated;CC:nucleus;MF:transcription factor activity, sequence-specific DNA binding;MF:sequence-specific DNA binding;	------	------	------	------	ENOG410YYXY	K:Transcription	KAF6993518.1	hypothetical protein CFC21_010398 [Triticum aestivum]	sp|Q9SDW0|TGT3A_ARATH;	Trihelix transcription factor GT-3a OS=Arabidopsis thaliana OX=3702 GN=GT-3A PE=1 SV=1;	PF13837.8;PF13873.8;PF00249.33;PF10545.11	Myb_DNA-bind_4;Myb_DNA-bind_5;Myb_DNA-binding;MADF_DNA_bdg	Myb/SANT-like DNA-binding domain;Myb/SANT-like DNA-binding domain;Myb-like DNA-binding domain;Alcohol dehydrogenase transcription factor Myb/SANT-like
TraesCS1D02G072900	100.413	37.0567	1.43815	-	GO:0006355;GO:0050896;GO:0005634;GO:0043565;GO:0003700;GO:000367	BP:regulation of transcription, DNA-templated;BP:response to stimulus;CC:nucleus;MF:sequence-specific DNA binding;MF:transcription factor activity, sequence-specific DNA binding;MF:DNA binding;	K13424	WRKY33	map04016;map04626	MAPK signaling pathway - plant;Plant-pathogen interaction	ENOG4112BTF	K:Transcription	XP_020151406.1	probable WRKY transcription factor 26 isoform X1 [Aegilops tauschii subsp. strangulata]	sp|Q6IEQ7|WRK24_ORYSJ;	WRKY transcription factor WRKY24 OS=Oryza sativa subsp. japonica OX=39947 GN=WRKY24 PE=2 SV=1;	PF03106.17	WRKY	WRKY DNA -binding domain
TraesCS1D02G073100	17.9867	7.925	1.18245	-	GO:0006468;GO:0016021;GO:0004674;GO:0005524;GO:000467	BP:protein phosphorylation;CC:integral component of membrane;MF:protein serine/threonine kinase activity;MF:ATP binding;MF:protein kinase activity;	------	------	------	------	COG0515	T:Signal transduction mechanisms	KAF6993527.1	hypothetical protein CFC21_010404 [Triticum aestivum]	sp|Q9LY50|ACCR3_ARATH;	Putative serine/threonine-protein kinase-like protein CCR3 OS=Arabidopsis thaliana OX=3702 GN=CCR3 PE=2 SV=1;	PF00069.27;PF07714.19;PF03109.18	Pkinase;PK_Tyr_Ser-Thr;ABC1	Protein kinase domain;Protein tyrosine and serine/threonine kinase;ABC1 atypical kinase-like domain
TraesCS1D02G076200	2.4025	0.684167	1.81212	-	GO:0006468;GO:0016021;GO:0004674;GO:0005524;GO:000467	BP:protein phosphorylation;CC:integral component of membrane;MF:protein serine/threonine kinase activity;MF:ATP binding;MF:protein kinase activity;	------	------	------	------	COG0515	T:Signal transduction mechanisms	KAF6993560.1	hypothetical protein CFC21_010436 [Triticum aestivum]	sp|Q9CAL3|CRK2_ARATH;	Cysteine-rich receptor-like protein kinase 2 OS=Arabidopsis thaliana OX=3702 GN=CRK2 PE=1 SV=1;	PF07714.19;PF00069.27;PF01657.19	PK_Tyr_Ser-Thr;Pkinase;Stress-antifung	Protein tyrosine and serine/threonine kinase;Protein kinase domain;Salt stress response/antifungal
TraesCS1D02G078600	5.70917	2.23	1.35624	-	GO:0006355;GO:0005634;GO:0003700;GO:0043565;GO:000367	BP:regulation of transcription, DNA-templated;CC:nucleus;MF:transcription factor activity, sequence-specific DNA binding;MF:sequence-specific DNA binding;MF:DNA binding;	K09422	MYBP	------	------	COG5147	K:Transcription	XP_020164818.1	transcription factor JAMYB [Aegilops tauschii subsp. strangulata]	sp|Q10MB4|MYB2_ORYSJ;	Transcription factor MYB2 OS=Oryza sativa subsp. japonica OX=39947 GN=MYB2 PE=2 SV=1;	PF00249.33;PF13921.8	Myb_DNA-binding;Myb_DNA-bind_6	Myb-like DNA-binding domain;Myb-like DNA-binding domain
TraesCS1D02G078700	11.3233	2.41417	2.2297	-	------	------	------	------	------	------	------	------	KAF6993600.1	hypothetical protein CFC21_010467 [Triticum aestivum]	------	------	------	------	------
TraesCS1D02G079100	1.2975	2.9775	-1.19837	-	GO:0006355;GO:000762	BP:regulation of transcription, DNA-templated;BP:circadian rhythm;	------	------	------	------	ENOG410Z9PA	S:Function unknown	XP_020152427.1	protein LNK4 [Aegilops tauschii subsp. strangulata]	------	------	------	------	------
TraesCS1D02G079800	19.065	45.0575	-1.24084	Peroxidase [Source:UniProtKB/TrEMBL;Acc:W5AMG0]	GO:0006979;GO:0042744;GO:0005576;GO:0009505;GO:0009506;GO:0020037;GO:0046872;GO:000460	BP:response to oxidative stress;BP:hydrogen peroxide catabolic process;CC:extracellular region;CC:plant-type cell wall;CC:plasmodesma;MF:heme binding;MF:metal ion binding;MF:peroxidase activity;	K00430	E1.11.1.7	map00940	Phenylpropanoid biosynthesis	ENOG41107NU	S:Function unknown	XP_020179970.1	peroxidase 2 [Aegilops tauschii subsp. strangulata]	sp|Q9FEQ8|PER2_MAIZE;	Peroxidase 2 OS=Zea mays OX=4577 GN=PER2 PE=2 SV=1;	PF00141.25	peroxidase	Peroxidase
TraesCS1D02G080000	0.178333	1.06583	-2.57934	Peroxidase [Source:UniProtKB/TrEMBL;Acc:A0A1D5T1X6]	GO:0006979;GO:0042744;GO:0005576;GO:0009505;GO:0009506;GO:0020037;GO:0046872;GO:000460	BP:response to oxidative stress;BP:hydrogen peroxide catabolic process;CC:extracellular region;CC:plant-type cell wall;CC:plasmodesma;MF:heme binding;MF:metal ion binding;MF:peroxidase activity;	K00430	E1.11.1.7	map00940	Phenylpropanoid biosynthesis	ENOG41104H3	S:Function unknown	XP_020179035.1	peroxidase 47 [Aegilops tauschii subsp. strangulata]	sp|Q9SZB9|PER47_ARATH;	Peroxidase 47 OS=Arabidopsis thaliana OX=3702 GN=PER47 PE=2 SV=2;	PF00141.25	peroxidase	Peroxidase
TraesCS1D02G080200	0.140833	0.799167	-2.50451	Peroxidase [Source:UniProtKB/TrEMBL;Acc:W5AN72]	GO:0006979;GO:0042744;GO:0005576;GO:0009505;GO:0009506;GO:0020037;GO:0046872;GO:000460	BP:response to oxidative stress;BP:hydrogen peroxide catabolic process;CC:extracellular region;CC:plant-type cell wall;CC:plasmodesma;MF:heme binding;MF:metal ion binding;MF:peroxidase activity;	K00430	E1.11.1.7	map00940	Phenylpropanoid biosynthesis	ENOG41106TR;ENOG41106UA	S:Function unknown;	KAF6993614.1	hypothetical protein CFC21_010480 [Triticum aestivum]	sp|Q9FEQ8|PER2_MAIZE;	Peroxidase 2 OS=Zea mays OX=4577 GN=PER2 PE=2 SV=1;	PF00141.25	peroxidase	Peroxidase
TraesCS1D02G080900	0.691667	2.58083	-1.89969	Peroxidase [Source:UniProtKB/TrEMBL;Acc:A0A341PFE8]	GO:0006979;GO:0042744;GO:0016021;GO:0005576;GO:0009505;GO:0009506;GO:0020037;GO:0046872;GO:000460	BP:response to oxidative stress;BP:hydrogen peroxide catabolic process;CC:integral component of membrane;CC:extracellular region;CC:plant-type cell wall;CC:plasmodesma;MF:heme binding;MF:metal ion binding;MF:peroxidase activity;	K00430	E1.11.1.7	map00940	Phenylpropanoid biosynthesis	ENOG411072Z;ENOG410YDTD	S:Function unknown;G:Carbohydrate transport and metabolism	XP_020187340.1	peroxidase 5 [Aegilops tauschii subsp. strangulata]	sp|A7QEU4|PER5_VITVI;	Peroxidase 5 OS=Vitis vinifera OX=29760 GN=GSVIVT00037159001 PE=1 SV=2;	PF00141.25	peroxidase	Peroxidase
TraesCS1D02G082200	3.2025	1.39	1.20411	Non-specific serine/threonine protein kinase [Source:UniProtKB/TrEMBL;Acc:A0A341PH05]	GO:0006468;GO:0007165;GO:0005524;GO:0004672;GO:0106311;GO:010631	BP:protein phosphorylation;BP:signal transduction;MF:ATP binding;MF:protein kinase activity;MF:old GO;MF:old GO;	K07198	PRKAA, AMPK	------	------	COG0515	T:Signal transduction mechanisms	KAF6993634.1	LOW QUALITY PROTEIN: hypothetical protein CFC21_010499 [Triticum aestivum]	sp|Q75L42|CIPKH_ORYSJ;	CBL-interacting protein kinase 17 OS=Oryza sativa subsp. japonica OX=39947 GN=CIPK17 PE=2 SV=1;	PF00069.27;PF07714.19;PF03822.16;PF14531.8;PF03109.18;PF02149.21	Pkinase;PK_Tyr_Ser-Thr;NAF;Kinase-like;ABC1;KA1	Protein kinase domain;Protein tyrosine and serine/threonine kinase;NAF domain;Kinase-like;ABC1 atypical kinase-like domain;Kinase associated domain 1
TraesCS1D02G082400	4.35667	1.93083	1.174	-	GO:0006511;GO:0000209;GO:0005634;GO:0061631;GO:0016740;GO:0003677;GO:000552	BP:ubiquitin-dependent protein catabolic process;BP:protein polyubiquitination;CC:nucleus;MF:ubiquitin conjugating enzyme activity;MF:transferase activity;MF:DNA binding;MF:ATP binding;	K06689	UBE2D, UBC4, UBC5	map04120;map04141	Ubiquitin mediated proteolysis;Protein processing in endoplasmic reticulum	COG5078	O:Posttranslational modification, protein turnover, chaperones	KAF6993635.1	hypothetical protein CFC21_010501 [Triticum aestivum]	sp|Q94F47|UBC28_ARATH;	Ubiquitin-conjugating enzyme E2 28 OS=Arabidopsis thaliana OX=3702 GN=UBC28 PE=1 SV=1;	PF00179.28	UQ_con	Ubiquitin-conjugating enzyme
TraesCS1D02G082500	9.8175	3.2875	1.57836	Non-specific serine/threonine protein kinase [Source:UniProtKB/TrEMBL;Acc:A0A341PDK8]	GO:0006468;GO:0007165;GO:0005524;GO:0004672;GO:0106311;GO:010631	BP:protein phosphorylation;BP:signal transduction;MF:ATP binding;MF:protein kinase activity;MF:old GO;MF:old GO;	K07198	PRKAA, AMPK	------	------	COG0515	T:Signal transduction mechanisms	KAF6993636.1	hypothetical protein CFC21_010502 [Triticum aestivum]	sp|Q75L42|CIPKH_ORYSJ;	CBL-interacting protein kinase 17 OS=Oryza sativa subsp. japonica OX=39947 GN=CIPK17 PE=2 SV=1;	PF00069.27;PF07714.19;PF03822.16;PF14531.8;PF03109.18;PF02149.21	Pkinase;PK_Tyr_Ser-Thr;NAF;Kinase-like;ABC1;KA1	Protein kinase domain;Protein tyrosine and serine/threonine kinase;NAF domain;Kinase-like;ABC1 atypical kinase-like domain;Kinase associated domain 1
TraesCS1D02G082800	3.53583	8.47417	-1.26102	-	GO:001674	MF:transferase activity, transferring acyl groups other than amino-acyl groups;	------	------	------	------	ENOG410YE2Y	S:Function unknown	KAF6993641.1	hypothetical protein CFC21_010504 [Triticum aestivum]	sp|Q5JNT2|AT4_ORYSJ;	Acyl transferase 4 OS=Oryza sativa subsp. japonica OX=39947 GN=AT4 PE=1 SV=1;	PF02458.17	Transferase	Transferase family
TraesCS1D02G083800	14.49	32.1517	-1.14984	-	------	------	------	------	------	------	ENOG410Z278	S:Function unknown	KAF6993656.1	hypothetical protein CFC21_010518 [Triticum aestivum]	------	------	------	------	------
TraesCS1D02G084500	14.805	4.025	1.87902	-	------	------	------	------	------	------	ENOG41105C2	S:Function unknown	KAF6993664.1	hypothetical protein CFC21_010525 [Triticum aestivum]	------	------	------	------	------
TraesCS1D02G085000	0.293333	1.04417	-1.83174	-	GO:001674	MF:transferase activity, transferring acyl groups other than amino-acyl groups;	K19861	BEBT, AMAT	------	------	ENOG410XNR7	S:Function unknown	KAF6993670.1	hypothetical protein CFC21_010529 [Triticum aestivum]	sp|Q6E593|BEBT1_PETHY;	Benzyl alcohol O-benzoyltransferase OS=Petunia hybrida OX=4102 GN=BEBT1 PE=1 SV=1;	PF02458.17	Transferase	Transferase family
TraesCS1D02G086000	5.85833	0	#DIV/0!	-	------	------	------	------	------	------	ENOG41113UW	S:Function unknown	KAF6993679.1	hypothetical protein CFC21_010539 [Triticum aestivum]	------	------	------	------	------
TraesCS1D02G086300	26.2792	8.37083	1.65048	-	------	------	------	------	------	------	ENOG41106GD;ENOG41105DU	S:Function unknown;	XP_020147848.1	uncharacterized protein LOC109733060 [Aegilops tauschii subsp. strangulata]	------	------	------	------	------
TraesCS1D02G088800	1.6525	0.7175	1.2036	Alpha-mannosidase [Source:UniProtKB/TrEMBL;Acc:A0A341PG27]	GO:0005975;GO:0006013;GO:0030246;GO:0003824;GO:0046872;GO:000455	BP:carbohydrate metabolic process;BP:mannose metabolic process;MF:carbohydrate binding;MF:catalytic activity;MF:metal ion binding;MF:alpha-mannosidase activity;	K01191	MAN2C1	map00511	Other glycan degradation	ENOG410XQMZ	G:Carbohydrate transport and metabolism	KAF6993710.1	hypothetical protein CFC21_010565 [Triticum aestivum]	sp|C0HJB3|MANA_CANEN;	Alpha-mannosidase OS=Canavalia ensiformis OX=3823 PE=1 SV=1;	PF01074.24;PF07748.15;PF09261.13;PF17677.3	Glyco_hydro_38N;Glyco_hydro_38C;Alpha-mann_mid;Glyco_hydro38C2	Glycosyl hydrolases family 38 N-terminal domain;Glycosyl hydrolases family 38 C-terminal domain;Alpha mannosidase middle domain;Glycosyl hydrolases family 38 C-terminal beta sandwich domain
TraesCS1D02G090000	17.7967	8.14	1.12851	-	GO:0005986;GO:0000287;GO:005030	BP:sucrose biosynthetic process;MF:magnesium ion binding;MF:sucrose-phosphate phosphatase activity;	K07024	SPP	map00500	Starch and sucrose metabolism	COG0561	S:Function unknown	XP_037486155.1	probable sucrose-phosphatase 3 [Triticum dicoccoides]	sp|A3AZW5|SPP3_ORYSJ;	Probable sucrose-phosphatase 3 OS=Oryza sativa subsp. japonica OX=39947 GN=SPP3 PE=3 SV=1;	PF05116.15;PF08472.12;PF08282.14	S6PP;S6PP_C;Hydrolase_3	Sucrose-6F-phosphate phosphohydrolase;Sucrose-6-phosphate phosphohydrolase C-terminal;haloacid dehalogenase-like hydrolase
TraesCS1D02G091600	12.3842	5.59	1.14758	-	GO:0006468;GO:0005524;GO:000467	BP:protein phosphorylation;MF:ATP binding;MF:protein kinase activity;	------	------	------	------	COG0515	T:Signal transduction mechanisms	XP_020168522.1	serine/threonine-protein kinase RIPK [Aegilops tauschii subsp. strangulata]	sp|Q9ZUF4|RIPK_ARATH;	Serine/threonine-protein kinase RIPK OS=Arabidopsis thaliana OX=3702 GN=RIPK PE=1 SV=1;	PF07714.19;PF00069.27	PK_Tyr_Ser-Thr;Pkinase	Protein tyrosine and serine/threonine kinase;Protein kinase domain
TraesCS1D02G096200	41.9725	13.6667	1.61878	Peroxidase [Source:UniProtKB/TrEMBL;Acc:W5AKM7]	GO:0006979;GO:0042744;GO:0005576;GO:0020037;GO:0046872;GO:000460	BP:response to oxidative stress;BP:hydrogen peroxide catabolic process;CC:extracellular region;MF:heme binding;MF:metal ion binding;MF:peroxidase activity;	K00430	E1.11.1.7	map00940	Phenylpropanoid biosynthesis	ENOG410YC4V	G:Carbohydrate transport and metabolism	KAF6993801.1	hypothetical protein CFC21_010639 [Triticum aestivum]	sp|Q42517|PERN_ARMRU;	Peroxidase N OS=Armoracia rusticana OX=3704 GN=HRPN PE=2 SV=1;	PF00141.25	peroxidase	Peroxidase
TraesCS1D02G100800	6.25583	2.37167	1.3993	-	------	------	------	------	------	------	ENOG410YBG3	S:Function unknown	KAF6993856.1	hypothetical protein CFC21_010683 [Triticum aestivum]	sp|P50699|TLPH_ARATH;	Thaumatin-like protein OS=Arabidopsis thaliana OX=3702 GN=At1g18250 PE=2 SV=2;	PF00314.19	Thaumatin	Thaumatin family
TraesCS1D02G102300	68.7883	14.6558	2.23069	-	GO:000551	MF:protein binding;	K10523	SPOP	------	------	ENOG410XQV8	S:Function unknown	KAF6993868.1	hypothetical protein CFC21_010694 [Triticum aestivum]	sp|Q8L765|BPM1_ARATH;	BTB/POZ and MATH domain-containing protein 1 OS=Arabidopsis thaliana OX=3702 GN=BPM1 PE=1 SV=1;	PF00651.33	BTB	BTB/POZ domain
TraesCS1D02G103500	37.6825	16.14	1.22325	Phenylalanine ammonia-lyase [Source:UniProtKB/TrEMBL;Acc:A0A341PQE9]	GO:0006559;GO:0009800;GO:0005737;GO:0016841;GO:0003824;GO:004554	BP:L-phenylalanine catabolic process;BP:cinnamic acid biosynthetic process;CC:cytoplasm;MF:ammonia-lyase activity;MF:catalytic activity;MF:phenylalanine ammonia-lyase activity;	K10775	PAL	map00940;map00360	Phenylpropanoid biosynthesis;Phenylalanine metabolism	COG2986	E:Amino acid transport and metabolism	XP_020174855.1	phenylalanine ammonia-lyase [Aegilops tauschii subsp. strangulata]	sp|Q43210|PALY_WHEAT;	Phenylalanine ammonia-lyase OS=Triticum aestivum OX=4565 GN=PAL PE=3 SV=1;	PF00221.21	Lyase_aromatic	Aromatic amino acid lyase
TraesCS1D02G105400	0.6325	0.061667	3.35849	-	GO:004687	MF:metal ion binding;	------	------	------	------	ENOG41105Z1	S:Function unknown	KAF6993910.1	hypothetical protein CFC21_010726 [Triticum aestivum]	------	------	PF00628.31	PHD	PHD-finger
TraesCS1D02G108800	0.338333	0.0725	2.22239	Similar to OsGA2ox1 [Source: Projected from Oryza sativa (Os05g0158600)]	GO:0009416;GO:0045487;GO:0052634;GO:0051213;GO:0046872;GO:001649	BP:response to light stimulus;BP:gibberellin catabolic process;MF:C-19 gibberellin 2-beta-dioxygenase activity;MF:dioxygenase activity;MF:metal ion binding;MF:oxidoreductase activity;	K04125	GA2ox	map00904	Diterpenoid biosynthesis	COG3491	S:Function unknown	KAF6993950.1	hypothetical protein CFC21_010761 [Triticum aestivum]	sp|Q5W726|G2OX1_ORYSJ;	Gibberellin 2-beta-dioxygenase 1 OS=Oryza sativa subsp. japonica OX=39947 GN=GA2OX1 PE=1 SV=1;	PF03171.22;PF14226.8	2OG-FeII_Oxy;DIOX_N	2OG-F;non-haem dioxygenase in morphine synthesis N-terminal
TraesCS1D02G111400	2.5375	0.264167	3.26389	-	GO:0005634;GO:000367	CC:nucleus;MF:DNA binding;	------	------	------	------	COG5269	K:Transcription	KAF6993992.1	hypothetical protein CFC21_010789 [Triticum aestivum]	sp|C0SVG5|RVE5_ARATH;	Protein REVEILLE 5 OS=Arabidopsis thaliana OX=3702 GN=RVE5 PE=2 SV=1;	PF00249.33;PF15963.7	Myb_DNA-binding;Myb_DNA-bind_7	Myb-like DNA-binding domain;Myb DNA-binding like
TraesCS1D02G116800	2.24583	6.34083	-1.49742	-	GO:0016021;GO:000551	CC:integral component of membrane;MF:protein binding;	------	------	------	------	ENOG41116YB	S:Function unknown	XP_020180778.1	embryo-specific protein ATS3A [Aegilops tauschii subsp. strangulata]	sp|Q681K2|ATS3A_ARATH;	Embryo-specific protein ATS3A OS=Arabidopsis thaliana OX=3702 GN=ATS3A PE=1 SV=1;	PF06232.13	ATS3	Embryo-specific protein 3,
TraesCS1D02G117200	5.43167	1.58833	1.77388	-	------	------	------	------	------	------	ENOG41120WB	S:Function unknown	XP_020186172.1	methylmalonyl-CoA epimerase, mitochondrial [Aegilops tauschii subsp. strangulata]	------	------	PF00903.27;PF12681.9;PF13669.8	Glyoxalase;Glyoxalase_2;Glyoxalase_4	Glyoxalase/Bleomycin resistance protein/Dioxygenase superfamily;Glyoxalase-like domain;Glyoxalase/Bleomycin resistance protein/Dioxygenase superfamily
TraesCS1D02G118100	51.3983	107.161	-1.05998	-	------	------	------	------	------	------	ENOG410ZUQD;ENOG410Z2Q7	S:Function unknown;	XP_020186166.1	uncharacterized protein LOC109771887 [Aegilops tauschii subsp. strangulata]	------	------	------	------	------
TraesCS1D02G118300	0.6875	0.2675	1.36182	-	GO:0034968;GO:0016571;GO:0005634;GO:0018024;GO:0008270;GO:000551	BP:histone lysine methylation;BP:histone methylation;CC:nucleus;MF:histone-lysine N-methyltransferase activity;MF:zinc ion binding;MF:protein binding;	K11420	EHMT	map00310	Lysine degradation	COG2940	S:Function unknown	KAF6994081.1	hypothetical protein CFC21_010869 [Triticum aestivum]	sp|Q8VZ17|SUVH6_ARATH;	Histone-lysine N-methyltransferase, H3 lysine-9 specific SUVH6 OS=Arabidopsis thaliana OX=3702 GN=SUVH6 PE=1 SV=2;	PF02182.19;PF00856.30;PF05033.18	SAD_SRA;SET;Pre-SET	SAD/SRA domain;SET domain;Pre-SET motif
TraesCS1D02G118500	43.7792	94.4725	-1.10965	-	------	------	------	------	------	------	ENOG410ZUQD;ENOG410Z2Q7	S:Function unknown;	XP_020186163.1	uncharacterized protein LOC109771882 [Aegilops tauschii subsp. strangulata]	------	------	------	------	------
TraesCS1D02G118800	0.090833	0.435	-2.25973	Glycosyltransferase [Source:UniProtKB/TrEMBL;Acc:W5ALM8]	GO:0016758;GO:000819	MF:transferase activity, transferring hexosyl groups;MF:UDP-glycosyltransferase activity;	K13496	UGT73C	map00908	Zeatin biosynthesis	COG1819	S:Function unknown	KAF6994089.1	hypothetical protein CFC21_010875 [Triticum aestivum]	sp|Q6VAA9|U73E1_STERE;	UDP-glycosyltransferase 73E1 OS=Stevia rebaudiana OX=55670 GN=UGT73E1 PE=2 SV=1;	PF00201.20	UDPGT	UDP-glucoronosyl and UDP-glucosyl transferase
TraesCS1D02G119900	4.6625	13.6808	-1.55298	-	GO:0008285;GO:000588	BP:negative regulation of cell proliferation;CC:plasma membrane;	------	------	------	------	ENOG410ZD85	S:Function unknown	KAE8781914.1	hypothetical protein D1007_44651 [Hordeum vulgare]	sp|Q6IM91|DVL10_ARATH;	Small polypeptide DEVIL 10 OS=Arabidopsis thaliana OX=3702 GN=DVL10 PE=3 SV=1;	PF08137.14	DVL	DVL family
TraesCS1D02G121000	55.9542	9.61583	2.54076	-	GO:0016887;GO:000552	MF:ATPase activity;MF:ATP binding;	K09489	HSPA4	------	------	COG0443	O:Posttranslational modification, protein turnover, chaperones	KAF6994114.1	hypothetical protein CFC21_010900 [Triticum aestivum]	sp|Q9S7C0|HSP7O_ARATH;	Heat shock 70 kDa protein 14 OS=Arabidopsis thaliana OX=3702 GN=HSP70-14 PE=1 SV=1;	PF00012.22;PF06723.15	HSP70;MreB_Mbl	Hsp70 protein;MreB/Mbl protein
TraesCS1D02G122800	13.2758	6.03833	1.13658	-	GO:000950	CC:chloroplast;	K08234	yaeR	------	------	ENOG410ZWRD	S:Function unknown	XP_020170127.1	uncharacterized protein YwkD [Aegilops tauschii subsp. strangulata]	sp|P45871|YWKD_BACSU;	Uncharacterized protein YwkD OS=Bacillus subtilis;	PF00903.27;PF13669.8	Glyoxalase;Glyoxalase_4	Glyoxalase/Bleomycin resistance protein/Dioxygenase superfamily;Glyoxalase/Bleomycin resistance protein/Dioxygenase superfamily
TraesCS1D02G126500	0.4875	0.178333	1.45083	-	GO:0055085;GO:0006873;GO:0016021;GO:0005623;GO:000830	BP:transmembrane transport;BP:cellular ion homeostasis;CC:integral component of membrane;CC:cell;MF:voltage-gated anion channel activity;	------	------	------	------	ENOG4111I0D	P:Inorganic ion transport and metabolism	XP_040256509.1	S-type anion channel SLAH2 isoform X2 [Aegilops tauschii subsp. strangulata]	sp|Q9FLV9|SLAH3_ARATH;	S-type anion channel SLAH3 OS=Arabidopsis thaliana OX=3702 GN=SLAH3 PE=1 SV=1;	PF03595.19	SLAC1	Voltage-dependent anion channel
TraesCS1D02G139400	71.68	22.1517	1.69416	-	GO:0030001;GO:004687	BP:metal ion transport;MF:metal ion binding;	------	------	------	------	COG2608	S:Function unknown	KAF6994420.1	hypothetical protein CFC21_011126 [Triticum aestivum]	sp|Q9LZF1|HIP6_ARATH;	Heavy metal-associated isoprenylated plant protein 6 OS=Arabidopsis thaliana OX=3702 GN=HIPP06 PE=1 SV=1;	PF00403.28	HMA	Heavy-metal-associated domain
TraesCS1D02G141400	0.073333	0.315833	-2.10663	-	GO:0055085;GO:001602	BP:transmembrane transport;CC:integral component of membrane;	------	------	------	------	COG1055	P:Inorganic ion transport and metabolism	XP_020159556.1	silicon efflux transporter LSI2 [Aegilops tauschii subsp. strangulata]	sp|Q10SY9|LSI2_ORYSJ;	Silicon efflux transporter LSI2 OS=Oryza sativa subsp. japonica OX=39947 GN=LSI2 PE=1 SV=1;	PF03600.18;PF02040.17	CitMHS;ArsB	Citrate transporter;Arsenical pump membrane protein
TraesCS1D02G147100	5.84667	1.40083	2.06133	-	------	------	------	------	------	------	ENOG4111W2D	S:Function unknown	KAF6994532.1	hypothetical protein CFC21_011208 [Triticum aestivum]	------	------	------	------	------
TraesCS1D02G149700	0.025	0.38	-3.926	-	GO:0006401;GO:0005576;GO:0033897;GO:0004521;GO:000372	BP:RNA catabolic process;CC:extracellular region;MF:ribonuclease T2 activity;MF:endoribonuclease activity;MF:RNA binding;	K01166	RNASET2	------	------	ENOG4111M7G	S:Function unknown	XP_020170473.1	ribonuclease 1 [Aegilops tauschii subsp. strangulata]	sp|P42813|RNS1_ARATH;	Ribonuclease 1 OS=Arabidopsis thaliana OX=3702 GN=RNS1 PE=1 SV=1;	PF00445.20	Ribonuclease_T2	Ribonuclease T2 family
TraesCS1D02G158700	37.6083	11.7383	1.67982	-	GO:0006334;GO:0000398;GO:0008380;GO:0006397;GO:0046540;GO:0016021;GO:0005634;GO:0005682;GO:000568	BP:nucleosome assembly;BP:mRNA splicing, via spliceosome;BP:RNA splicing;BP:mRNA processing;CC:U4/U6 x U5 tri-snRNP complex;CC:integral component of membrane;CC:nucleus;CC:U5 snRNP;CC:spliceosomal complex;	K12859	TXNL4A, DIB1	map03040	Spliceosome	ENOG4111FE6	S:Function unknown	VAH16547.1	unnamed protein product [Triticum turgidum subsp. durum]	sp|Q9FE62|YLS8_ARATH;	Thioredoxin-like protein YLS8 OS=Arabidopsis thaliana OX=3702 GN=YLS8 PE=1 SV=1;	PF02966.18;PF00085.22	DIM1;Thioredoxin	Mitosis protein DIM1;Thioredoxin
TraesCS1D02G160200	3.10333	0.995	1.64105	-	GO:000551	MF:protein binding;	------	------	------	------	ENOG410XQV8	S:Function unknown	XP_040258402.1	uncharacterized protein LOC109736487 isoform X2 [Aegilops tauschii subsp. strangulata]	sp|A8MQL1|TRF1B_ARATH;	TNF receptor-associated factor homolog 1b OS=Arabidopsis thaliana OX=3702 GN=TRAF1B PE=1 SV=1;	PF00917.28	MATH	MATH domain
TraesCS1D02G163000	4.01417	0.550833	2.86541	-	GO:001602	CC:integral component of membrane;	------	------	------	------	ENOG41106A3	S:Function unknown	XP_040258591.1	uncharacterized protein LOC120975909 [Aegilops tauschii subsp. strangulata]	------	------	------	------	------
TraesCS1D02G163400	3.91917	1.87083	1.06687	-	GO:0006438;GO:0006418;GO:0005737;GO:0004812;GO:0004823;GO:0000166;GO:0002161;GO:0004832;GO:000552	BP:valyl-tRNA aminoacylation;BP:tRNA aminoacylation for protein translation;CC:cytoplasm;MF:aminoacyl-tRNA ligase activity;MF:leucine-tRNA ligase activity;MF:nucleotide binding;MF:aminoacyl-tRNA editing activity;MF:valine-tRNA ligase activity;MF:ATP binding;	K01873	VARS, valS	map00970	Aminoacyl-tRNA biosynthesis	COG0525	J:Translation, ribosomal structure and biogenesis	KAF7053521.1	hypothetical protein CFC21_061421 [Triticum aestivum]	sp|P93736|SYVM1_ARATH;	Valine--tRNA ligase, mitochondrial 1 OS=Arabidopsis thaliana OX=3702 GN=TWN2 PE=1 SV=2;	PF00133.24;PF08264.15;PF09334.13;PF13603.8;PF10458.11	tRNA-synt_1;Anticodon_1;tRNA-synt_1g;tRNA-synt_1_2;Val_tRNA-synt_C	tRNA synthetases class I;Anticodon-binding domain of tRNA ligase;tRNA synthetases class I;Leucyl-tRNA synthetase, Domain 2;Valyl tRNA synthetase tRNA binding arm
TraesCS1D02G164100	4.085	8.56	-1.06727	-	------	------	------	------	------	------	ENOG410YCMD	S:Function unknown	KAF6985830.1	hypothetical protein CFC21_003648 [Triticum aestivum]	------	------	PF10358.11;PF08614.13	NT-C2;ATG16	N-terminal C2 in EEIG1 and EHBP1 proteins;Autophagy protein 16
TraesCS1D02G168400	2.29	7.01083	-1.61424	-	GO:0003824;GO:001678	MF:catalytic activity;MF:hydrolase activity;	------	------	------	------	ENOG410XRPK;COG0596	S:Function unknown;	XP_020159060.1	bifunctional epoxide hydrolase 2 [Aegilops tauschii subsp. strangulata]	sp|P34913|HYES_HUMAN;	Bifunctional epoxide hydrolase 2 OS=Homo sapiens OX=9606 GN=EPHX2 PE=1 SV=2;	PF00561.22;PF12697.9;PF12146.10	Abhydrolase_1;Abhydrolase_6;Hydrolase_4	alpha/beta hydrolase fold;Alpha/beta hydrolase family;Serine aminopeptidase, S33
TraesCS1D02G175200	10.0458	2.865	1.80999	-	GO:0055085;GO:0016021;GO:0016020;GO:0005774;GO:0032586;GO:0015250;GO:001526	BP:transmembrane transport;CC:integral component of membrane;CC:membrane;CC:vacuolar membrane;CC:protein storage vacuole membrane;MF:water channel activity;MF:channel activity;	K09873	TIP	------	------	COG0580	G:Carbohydrate transport and metabolism	XP_020197424.1	probable aquaporin TIP3-1 [Aegilops tauschii subsp. strangulata]	sp|Q9FWV6|TIP31_ORYSJ;	Probable aquaporin TIP3-1 OS=Oryza sativa subsp. japonica OX=39947 GN=TIP3-1 PE=2 SV=1;	PF00230.22	MIP	Major intrinsic protein
TraesCS1D02G187100	24.1425	11.685	1.04692	-	------	------	------	------	------	------	ENOG4111QDI	S:Function unknown	KAF6995009.1	hypothetical protein CFC21_011587 [Triticum aestivum]	------	------	PF12697.9;PF00561.22;PF12146.10	Abhydrolase_6;Abhydrolase_1;Hydrolase_4	Alpha/beta hydrolase family;alpha/beta hydrolase fold;Serine aminopeptidase, S33
TraesCS1D02G187500	12.3283	5.86167	1.07259	Rhomboid-like protein [Source:UniProtKB/TrEMBL;Acc:M1GLC1]	GO:0006508;GO:0016021;GO:0016020;GO:0004252;GO:0016787;GO:000823	BP:proteolysis;CC:integral component of membrane;CC:membrane;MF:serine-type endopeptidase activity;MF:hydrolase activity;MF:peptidase activity;	------	------	------	------	COG0705	S:Function unknown	XP_020176374.2	RHOMBOID-like protein 2 [Aegilops tauschii subsp. strangulata]	sp|Q0WQX7|RBL1_ARATH;	RHOMBOID-like protein 1 OS=Arabidopsis thaliana OX=3702 GN=RBL1 PE=2 SV=1;	PF01694.24	Rhomboid	Rhomboid family
TraesCS1D02G188800	6.40917	2.63833	1.28051	-	------	------	------	------	------	------	ENOG411074S	S:Function unknown	KAF6995027.1	hypothetical protein CFC21_011603 [Triticum aestivum]	------	------	------	------	------
TraesCS1D02G189700	2.9475	1.13667	1.37468	-	GO:0006749;GO:0005737;GO:0016740;GO:0004364;GO:000551	BP:glutathione metabolic process;CC:cytoplasm;MF:transferase activity;MF:glutathione transferase activity;MF:protein binding;	K00799	GST, gst	map00480	Glutathione metabolism	ENOG410XSIX	O:Posttranslational modification, protein turnover, chaperones	XP_020158198.2	probable glutathione S-transferase GSTU6 [Aegilops tauschii subsp. strangulata]	sp|Q06398|GSTU6_ORYSJ;	Probable glutathione S-transferase GSTU6 OS=Oryza sativa subsp. japonica OX=39947 GN=GSTU6 PE=2 SV=2;	PF02798.22;PF13417.8;PF13409.8;PF13410.8;PF17172.6;PF00043.27	GST_N;GST_N_3;GST_N_2;GST_C_2;GST_N_4;GST_C	Glutathione S-transferase, N-terminal domain;Glutathione S-transferase, N-terminal domain;Glutathione S-transferase, N-terminal domain;Glutathione S-transferase, C-terminal domain;Glutathione S-transferase N-terminal domain;Glutathione S-transferase, C-terminal domain
TraesCS1D02G190600	4.42917	13.1467	-1.56959	-	GO:0006749;GO:0005737;GO:0016740;GO:0004364;GO:000551	BP:glutathione metabolic process;CC:cytoplasm;MF:transferase activity;MF:glutathione transferase activity;MF:protein binding;	K00799	GST, gst	map00480	Glutathione metabolism	ENOG410XSIX	O:Posttranslational modification, protein turnover, chaperones	XP_020187895.1	probable glutathione S-transferase GSTU6 [Aegilops tauschii subsp. strangulata]	sp|Q06398|GSTU6_ORYSJ;	Probable glutathione S-transferase GSTU6 OS=Oryza sativa subsp. japonica OX=39947 GN=GSTU6 PE=2 SV=2;	PF02798.22;PF13417.8;PF13409.8;PF13410.8;PF17172.6;PF00043.27	GST_N;GST_N_3;GST_N_2;GST_C_2;GST_N_4;GST_C	Glutathione S-transferase, N-terminal domain;Glutathione S-transferase, N-terminal domain;Glutathione S-transferase, N-terminal domain;Glutathione S-transferase, C-terminal domain;Glutathione S-transferase N-terminal domain;Glutathione S-transferase, C-terminal domain
TraesCS1D02G190700	4.50583	1.65667	1.44351	-	GO:0030001;GO:004687	BP:metal ion transport;MF:metal ion binding;	------	------	------	------	COG2608	S:Function unknown	XP_020180756.1	heavy metal-associated isoprenylated plant protein 39 [Aegilops tauschii subsp. strangulata]	sp|O03982|HIP39_ARATH;	Heavy metal-associated isoprenylated plant protein 39 OS=Arabidopsis thaliana OX=3702 GN=HIPP39 PE=2 SV=1;	PF00403.28	HMA	Heavy-metal-associated domain
TraesCS1D02G195400	1.81833	4.45667	-1.29335	-	GO:0055085;GO:001602	BP:transmembrane transport;CC:integral component of membrane;	K15109	SLC25A20_29, CACT, CACL, CRC1	------	------	ENOG410XS86	S:Function unknown	KAF6995126.1	hypothetical protein CFC21_011678 [Triticum aestivum]	sp|Q93XM7|MCAT_ARATH;	Mitochondrial carnitine/acylcarnitine carrier-like protein OS=Arabidopsis thaliana OX=3702 GN=BOU PE=1 SV=1;	PF00153.29	Mito_carr	Mitochondrial carrier protein
TraesCS1D02G199500	0.521667	1.9825	-1.92612	Glycosyltransferase family 2 (GT2) protein, Root hair morphogenesi [Source: Projected from Oryza sativa (Os10g0578200)]	GO:0009833;GO:0030244;GO:0016021;GO:0016020;GO:0005886;GO:0005802;GO:0051753;GO:001676	BP:plant-type primary cell wall biogenesis;BP:cellulose biosynthetic process;CC:integral component of membrane;CC:membrane;CC:plasma membrane;CC:trans-Golgi network;MF:mannan synthase activity;MF:cellulose synthas;	K20924	CSLD	------	------	COG1215	M:Cell wall/membrane/envelope biogenesis	KAF6995169.1	hypothetical protein CFC21_011719 [Triticum aestivum]	sp|A2ZAK8|CSLD1_ORYSI;	Cellulose synthase-like protein D1 OS=Oryza sativa subsp. indica OX=39946 GN=CSLD1 PE=3 SV=2;	PF03552.16;PF14570.8;PF13632.8;PF00535.28	Cellulose_synt;zf-RING_4;Glyco_trans_2_3;Glycos_transf_2	Cellulose synthase;RING/Ubox like zinc-binding domain;Glycosyl transferase family group 2;Glycosyl transferase family 2
TraesCS1D02G200600	0.900833	0.384167	1.22953	Cytochrome P450, family 722, subfamily A, polypeptide 1 [Source:Projected from Arabidopsis thaliana (AT1G19630) UniProtKB/TrEMBL;Acc:F4HP86]	GO:0010268;GO:0016132;GO:0016125;GO:0007275;GO:0016021;GO:0004497;GO:0020037;GO:0016705;GO:0005506;GO:001649	BP:brassinosteroid homeostasis;BP:brassinosteroid biosynthetic process;BP:sterol metabolic process;BP:multicellular organism development;CC:integral component of membrane;MF:monooxygenase activity;MF:heme binding;MF:oxidoreductase activity, acting on paired donors, with incorporation or reduction of molecular oxygen;MF:iron ion binding;MF:oxidoreductase activity;	------	------	------	------	COG2124	Q:Secondary metabolites biosynthesis, transport and catabolism	XP_020159329.2	cytochrome P450 85A1 [Aegilops tauschii subsp. strangulata]	sp|Q8GSQ1|C85A1_ORYSJ;	Cytochrome P450 85A1 OS=Oryza sativa subsp. japonica OX=39947 GN=CYP85A1 PE=1 SV=1;	PF00067.24	p450	Cytochrome P450
TraesCS1D02G202300	10.08	3.72417	1.43651	-	GO:0032259;GO:0016021;GO:000816	BP:methylation;CC:integral component of membrane;MF:methyltransferase activity;	------	------	------	------	ENOG4111CGI	S:Function unknown	KAF6995199.1	hypothetical protein CFC21_011743 [Triticum aestivum]	sp|Q94II3|PMTL_ARATH;	Probable methyltransferase PMT21 OS=Arabidopsis thaliana OX=3702 GN=ERD3 PE=2 SV=1;	PF03141.18;PF08241.14;PF13649.8	Methyltransf_29;Methyltransf_11;Methyltransf_25	Putative S-adenosyl-L-methionine-dependent methyltransferase;Methyltransferase domain;Methyltransferase domain
TraesCS1D02G203000	0.199167	0.0275	2.85648	-	GO:001602	CC:integral component of membrane;	------	------	------	------	ENOG4111Q5U	S:Function unknown	XP_020188785.1	uncharacterized protein LOC109774476 [Aegilops tauschii subsp. strangulata]	------	------	------	------	------
TraesCS1D02G205500	2.24417	0.746667	1.58764	MLO-like protein [Source:UniProtKB/TrEMBL;Acc:A0A1D5SYF9]	GO:0006952;GO:0009607;GO:0016021;GO:000551	BP:defense response;BP:response to biotic stimulus;CC:integral component of membrane;MF:calmodulin binding;	K08472	MLO	------	------	ENOG410YDNX	D:Cell cycle control, cell division, chromosome partitioning	KAF6995242.1	hypothetical protein CFC21_011777 [Triticum aestivum]	sp|Q94KB4|MLO9_ARATH;	MLO-like protein 9 OS=Arabidopsis thaliana OX=3702 GN=MLO9 PE=2 SV=2;	PF03094.17	Mlo	Mlo family
TraesCS1D02G207600	0.449167	1.19333	-1.40967	-	GO:0055085;GO:0016021;GO:0005215;GO:0022857;GO:001529	BP:transmembrane transport;CC:integral component of membrane;MF:transporter activity;MF:transmembrane transporter activity;MF:symporter activity;	------	------	------	------	ENOG410ZVCA	G:Carbohydrate transport and metabolism	XP_020181298.1	tetracycline resistance protein, class A isoform X2 [Aegilops tauschii subsp. strangulata]	sp|Q96MC6|MF14A_HUMAN;	Hippocampus abundant transcript 1 protein OS=Homo sapiens OX=9606 GN=MFSD14A PE=1 SV=2;	PF07690.18;PF00083.26	MFS_1;Sugar_tr	Major Facilitator Superfamily;Sugar
TraesCS1D02G209400	4.40917	1.32583	1.73361	-	GO:0016567;GO:0016021;GO:0016020;GO:0004842;GO:000827	BP:protein ubiquitination;CC:integral component of membrane;CC:membrane;MF:ubiquitin-protein transferase activity;MF:zinc ion binding;	------	------	------	------	COG5183	O:Posttranslational modification, protein turnover, chaperones	XP_020188900.1	uncharacterized protein LOC109774571 [Aegilops tauschii subsp. strangulata]	sp|Q32L65|MARH2_BOVIN;	E3 ubiquitin-protein ligase MARCHF2 OS=Bos taurus OX=9913 GN=MARCHF2 PE=2 SV=1;	PF12428.10;PF12906.9	DUF3675;RINGv	Protein of unknown function;RING-variant domain
TraesCS1D02G209800	1.33167	7.44167	-2.48239	-	GO:007194	CC:cell periphery;	------	------	------	------	ENOG410YZ4T	S:Function unknown	KAF6995295.1	hypothetical protein CFC21_011821 [Triticum aestivum]	------	------	PF01190.19	Pollen_Ole_e_1	Pollen protein Ole e 1 like
TraesCS1D02G210900	0.199167	0	#DIV/0!	-	GO:0016021;GO:001602	CC:integral component of membrane;CC:membrane;	------	------	------	------	ENOG410YIUI	S:Function unknown	XP_020169259.1	uncharacterized protein LOC109754768 [Aegilops tauschii subsp. strangulata]	------	------	------	------	------
TraesCS1D02G213700	28.7292	11.23	1.35516	Trehalose 6-phosphate phosphatase [Source:UniProtKB/TrEMBL;Acc:W5ADC4]	GO:0005992;GO:0016021;GO:0003824;GO:000480	BP:trehalose biosynthetic process;CC:integral component of membrane;MF:catalytic activity;MF:trehalose-phosphatase activity;	K01087	otsB	map00500	Starch and sucrose metabolism	COG1877	G:Carbohydrate transport and metabolism	VAH06121.1	unnamed protein product [Triticum turgidum subsp. durum]	sp|Q9FWQ2|TPP2_ORYSJ;	Probable trehalose-phosphate phosphatase 2 OS=Oryza sativa subsp. japonica OX=39947 GN=TPP2 PE=1 SV=1;	PF02358.18	Trehalose_PPase	Trehalose-phosphatase
TraesCS1D02G214600	0.961667	2.11917	-1.13989	-	GO:0051225;GO:0005737;GO:0005880;GO:000801	BP:spindle assembly;CC:cytoplasm;CC:nuclear microtubule;MF:microtubule binding;	------	------	------	------	ENOG410YP4H	S:Function unknown	KAF6995348.1	hypothetical protein CFC21_011865 [Triticum aestivum]	sp|Q1PE51|QWRF7_ARATH;	QWRF motif-containing protein 7 OS=Arabidopsis thaliana OX=3702 GN=QWRF7 PE=2 SV=1;	PF04484.14	QWRF	QWRF family
TraesCS1D02G215100	30.6683	89.4533	-1.54439	-	GO:0019953;GO:000557	BP:sexual reproduction;CC:extracellular region;	------	------	------	------	ENOG410YEZU;ENOG41105Y3;ENOG41104H4	G:Carbohydrate transport and metabolism;	KAF6995350.1	hypothetical protein CFC21_011867 [Triticum aestivum]	sp|Q7XCA7|EXPB6_ORYSJ;	Expansin-B6 OS=Oryza sativa subsp. japonica OX=39947 GN=EXPB6 PE=2 SV=1;	PF01357.23;PF03330.20	Expansin_C;DPBB_1	Expansin C-terminal domain;Lytic transglycolase
TraesCS1D02G215200	7.53667	37.2867	-2.30666	-	GO:0019953;GO:0016021;GO:000557	BP:sexual reproduction;CC:integral component of membrane;CC:extracellular region;	------	------	------	------	ENOG410YEZU;ENOG41105Y3	G:Carbohydrate transport and metabolism;	KAF6995352.1	hypothetical protein CFC21_011869 [Triticum aestivum]	sp|Q7XCA7|EXPB6_ORYSJ;	Expansin-B6 OS=Oryza sativa subsp. japonica OX=39947 GN=EXPB6 PE=2 SV=1;	PF01357.23;PF03330.20	Expansin_C;DPBB_1	Expansin C-terminal domain;Lytic transglycolase
TraesCS1D02G215400	18.9608	8.04917	1.23611	-	GO:0019953;GO:0005618;GO:0016020;GO:000557	BP:sexual reproduction;CC:cell wall;CC:membrane;CC:extracellular region;	------	------	------	------	ENOG41104H4	G:Carbohydrate transport and metabolism	XP_020164236.1	expansin-B3 [Aegilops tauschii subsp. strangulata]	sp|Q336T5|EXPB3_ORYSJ;	Expansin-B3 OS=Oryza sativa subsp. japonica OX=39947 GN=EXPB3 PE=2 SV=2;	PF01357.23;PF03330.20	Expansin_C;DPBB_1	Expansin C-terminal domain;Lytic transglycolase
TraesCS1D02G216400	1.74917	5.99417	-1.77689	-	GO:001678	MF:hydrolase activity;	------	------	------	------	COG0637	S:Function unknown	KAF6995368.1	hypothetical protein CFC21_011882 [Triticum aestivum]	sp|Q9ZVJ5|SGGP_ARATH;	Haloacid dehalogenase-like hydrolase domain-containing protein Sgpp OS=Arabidopsis thaliana OX=3702 GN=SGPP PE=1 SV=2;	PF13419.8;PF00702.28;PF12710.9;PF13242.8	HAD_2;Hydrolase;HAD;Hydrolase_like	Haloacid dehalogenase-like hydrolase;haloacid dehalogenase-like hydrolase;haloacid dehalogenase-like hydrolase;HAD-hyrolase-like
TraesCS1D02G216700	15.815	4.64833	1.76651	-	GO:0000266;GO:0005737;GO:0016020;GO:0008017;GO:0003924;GO:000552	BP:mitochondrial fission;CC:cytoplasm;CC:membrane;MF:microtubule binding;MF:GTPase activity;MF:GTP binding;	------	------	------	------	COG0699	S:Function unknown	KAF6984181.1	hypothetical protein CFC21_002224 [Triticum aestivum]	sp|Q9FNX5|DRP1E_ARATH;	Phragmoplastin DRP1E OS=Arabidopsis thaliana OX=3702 GN=DRP1E PE=1 SV=1;	PF01031.22;PF00350.25;PF02212.20;PF01926.25	Dynamin_M;Dynamin_N;GED;MMR_HSR1	Dynamin central region;Dynamin family;Dynamin GTPase effector domain;50S ribosome-binding GTPase
TraesCS1D02G217700	3.08083	1.23	1.32466	-	GO:0006896;GO:0006623;GO:0006511;GO:0005802;GO:0016021;GO:0016020;GO:0005768;GO:0017119;GO:0016874;GO:006163	BP:Golgi to vacuole transport;BP:protein targeting to vacuole;BP:ubiquitin-dependent protein catabolic process;CC:trans-Golgi network;CC:integral component of membrane;CC:membrane;CC:endosome;CC:Golgi transport complex;MF:ligase activity;MF:ubiquitin protein ligase activity;	K10663	ATL4	------	------	ENOG41121N2	O:Posttranslational modification, protein turnover, chaperones	XP_020194155.1	E3 ubiquitin-protein ligase ATL4 [Aegilops tauschii subsp. strangulata]	sp|Q940Q4|ATL13_ARATH;	RING-H2 finger protein ATL13 OS=Arabidopsis thaliana OX=3702 GN=ATL13 PE=2 SV=2;	PF13639.8;PF12678.9;PF17123.7;PF13923.8;PF12861.9;PF00097.27	zf-RING_2;zf-rbx1;zf-RING_11;zf-C3HC4_2;zf-ANAPC11;zf-C3HC4	Ring finger domain;RING-H2 zinc finger domain;RING-like zinc finger;Zinc finger, C3HC4 type;Anaphase-promoting complex subunit 11 RING-H2 finger;Zinc finger, C3HC4 type
TraesCS1D02G218000	7.37083	18.5458	-1.3312	Beta-amylase [Source:UniProtKB/TrEMBL;Acc:A0A1D5T0S0]	GO:0005983;GO:0000272;GO:0009409;GO:0000024;GO:0009570;GO:0016161;GO:010222	BP:starch catabolic process;BP:polysaccharide catabolic process;BP:response to cold;BP:maltose biosynthetic process;CC:chloroplast stroma;MF:beta-amylase activity;MF:amylopectin maltohydrolase activity;	K01177	E3.2.1.2	map00500	Starch and sucrose metabolism	ENOG410XRH5	S:Function unknown	XP_020146919.1	beta-amylase 3, chloroplastic [Aegilops tauschii subsp. strangulata]	sp|O23553|BAM3_ARATH;	Beta-amylase 3, chloroplastic OS=Arabidopsis thaliana OX=3702 GN=BAM3 PE=1 SV=3;	PF01373.19	Glyco_hydro_14	Glycosyl hydrolase family 14
TraesCS1D02G218900	4.5975	1.24833	1.88085	PRA1 family protein [Source:UniProtKB/TrEMBL;Acc:A0A1D5SXY3]	GO:001602	CC:integral component of membrane;	------	------	------	------	ENOG410ZHHJ	S:Function unknown	KAF6995402.1	hypothetical protein CFC21_011908 [Triticum aestivum]	------	------	PF03208.21	PRA1	PRA1 family protein
TraesCS1D02G220000	2.81	1.11083	1.33893	-	GO:0006415;GO:0000054;GO:0006413;GO:0042626;GO:0051536;GO:0016887;GO:0005506;GO:0046872;GO:0043024;GO:000552	BP:translational termination;BP:ribosomal subunit export from nucleus;BP:translational initiation;MF:ATPase activity, coupled to transmembrane movement of substances;MF:iron-sulfur cluster binding;MF:ATPase activity;MF:iron ion binding;MF:metal ion binding;MF:ribosomal small subunit binding;MF:ATP binding;	K06174	ABCE1, Rli1	------	------	COG1245	S:Function unknown	KAF6995418.1	hypothetical protein CFC21_011921 [Triticum aestivum]	sp|Q8LPJ4|AB2E_ARATH;	ABC transporter E family member 2 OS=Arabidopsis thaliana OX=3702 GN=ABCE2 PE=2 SV=1;	PF00005.29;PF04068.17;PF02463.21;PF00037.29;PF13191.8;PF00004.31;PF05729.14;PF12837.9;PF14697.8;PF12797.9;PF13237.8;PF05621.13	ABC_tran;RLI;SMC_N;Fer4;AAA_16;AAA;NACHT;Fer4_6;Fer4_21;Fer4_2;Fer4_10;TniB	ABC transporter;Possible Fer4-like domain in RNase L inhibitor, RLI;RecF/RecN/SMC N terminal domain;4Fe-4S binding domain;AAA ATPase domain;ATPase family associated with various cellular activities;NACHT domain;4Fe-4S binding domain;4Fe-4S dicluster domain;4Fe-4S binding domain;4Fe-4S dicluster domain;Bacterial TniB protein
TraesCS1D02G220900	4.62	1.97167	1.22848	-	GO:0006355;GO:0005634;GO:0043565;GO:0003700;GO:0003677;GO:000098	BP:regulation of transcription, DNA-templated;CC:nucleus;MF:sequence-specific DNA binding;MF:transcription factor activity, sequence-specific DNA binding;MF:DNA binding;MF:RNA polymerase II transcription factor activity, sequence-specific DNA binding;	K09338	HD-ZIP	------	------	ENOG410Z2UE	K:Transcription	XP_020169616.1	homeobox-leucine zipper protein HOX1 [Aegilops tauschii subsp. strangulata]	sp|Q05466|HAT4_ARATH;	Homeobox-leucine zipper protein HAT4 OS=Arabidopsis thaliana OX=3702 GN=HAT4 PE=1 SV=1;	PF04618.14;PF00046.31;PF02183.20;PF05920.13	HD-ZIP_N;Homeodomain;HALZ;Homeobox_KN	HD-ZIP protein N terminus;Homeodomain;Homeobox associated leucine zipper;Homeobox KN domain
TraesCS1D02G223600	38.8042	15.7208	1.30353	-	GO:0006355;GO:0006351;GO:0005634;GO:0003700;GO:000367	BP:regulation of transcription, DNA-templated;BP:transcription, DNA-templated;CC:nucleus;MF:transcription factor activity, sequence-specific DNA binding;MF:DNA binding;	------	------	------	------	ENOG410YKCQ	K:Transcription	KAF6995461.1	hypothetical protein CFC21_011957 [Triticum aestivum]	sp|Q5W6R4|DRE2B_ORYSJ;	Dehydration-responsive element-binding protein 2B OS=Oryza sativa subsp. japonica OX=39947 GN=DREB2B PE=2 SV=2;	PF00847.22	AP2	AP2 domain
TraesCS1D02G232100	12.4308	4.98667	1.31778	-	GO:0003723;GO:000367	MF:RNA binding;MF:nucleic acid binding;	K12890	SRSF1, SFRS1, ASF, SF2	map03040	Spliceosome	COG0724	S:Function unknown	XP_020148398.1	serine/arginine-rich splicing factor SR30 [Aegilops tauschii subsp. strangulata]	sp|Q9XFR5|SR30_ARATH;	Serine/arginine-rich splicing factor SR30 OS=Arabidopsis thaliana OX=3702 GN=SR30 PE=1 SV=1;	PF00076.24;PF16842.7	RRM_1;RRM_occluded	RNA recognition motif.;Occluded RNA-recognition motif
TraesCS1D02G232200	0.3625	1.05333	-1.53891	-	GO:0010099;GO:0009585;GO:0048573;GO:0048366;GO:0005634;GO:000551	BP:regulation of photomorphogenesis;BP:red, far-red light phototransduction;BP:photoperiodism, flowering;BP:leaf development;CC:nucleus;MF:protein binding;	------	------	------	------	ENOG410Y9MI	S:Function unknown	XP_020163527.1	phytochrome A-associated F-box protein [Aegilops tauschii subsp. strangulata]	sp|Q8LEA8|EID1_ARATH;	Phytochrome A-associated F-box protein OS=Arabidopsis thaliana OX=3702 GN=EID1 PE=1 SV=2;	------	------	------
TraesCS1D02G234800	1.47667	0.72	1.03628	-	GO:0008270;GO:000551	MF:zinc ion binding;MF:protein binding;	------	------	------	------	ENOG410Z7Z7	S:Function unknown	XP_020178056.1	pentatricopeptide repeat-containing protein At1g20230 [Aegilops tauschii subsp. strangulata]	sp|Q9LNU6|PPR53_ARATH;	Pentatricopeptide repeat-containing protein At1g20230 OS=Arabidopsis thaliana OX=3702 GN=PCMP-H21 PE=2 SV=2;	PF01535.22;PF13041.8;PF14432.8;PF12854.9;PF13812.8;PF17177.6	PPR;PPR_2;DYW_deaminase;PPR_1;PPR_3;PPR_long	PPR repeat;PPR repeat family;DYW family of nucleic acid deaminases;PPR repeat;Pentatricopeptide repeat domain;Pentacotripeptide-repeat region of PRORP
TraesCS1D02G236100	23.59	3.12833	2.91471	-	GO:000552	MF:ATP binding;	------	------	------	------	------	------	KAF7015298.1	hypothetical protein CFC21_029177 [Triticum aestivum]	------	------	------	------	------
TraesCS1D02G238100	5.74	1.03167	2.47607	-	GO:0016021;GO:0003824;GO:0016846;GO:000848	CC:integral component of membrane;MF:catalytic activity;MF:carbon-sulfur lyase activity;MF:transaminase activity;	K16903	TAA1	map00380	Tryptophan metabolism	ENOG410YMNS	E:Amino acid transport and metabolism	KAF6995632.1	hypothetical protein CFC21_012095 [Triticum aestivum]	sp|Q5VQG8|TAR2_ORYSJ;	Tryptophan aminotransferase-related protein 2 OS=Oryza sativa subsp. japonica OX=39947 GN=TAR2 PE=1 SV=1;	PF04864.15;PF00155.23	Alliinase_C;Aminotran_1_2	Allinase;Aminotransferase class I and II
TraesCS1D02G239000	17.5825	6.27	1.4876	-	GO:000550	MF:calcium ion binding;	K13448	CML	map04626	Plant-pathogen interaction	COG5126;COG5126;COG5126	D:Cell cycle control, cell division, chromosome partitioning;T:Signal transduction mechanisms;Z:Cytoskeleton	XP_020167597.1	probable calcium-binding protein CML15 [Aegilops tauschii subsp. strangulata]	sp|Q6L4D4|CML15_ORYSJ;	Probable calcium-binding protein CML15 OS=Oryza sativa subsp. japonica OX=39947 GN=CML15 PE=2 SV=1;	PF00036.34;PF13499.8;PF13202.8;PF13405.8;PF13833.8;PF10591.11	EF-hand_1;EF-hand_7;EF-hand_5;EF-hand_6;EF-hand_8;SPARC_Ca_bdg	EF hand;EF-hand domain pair;EF hand;EF-hand domain;EF-hand domain pair;Secreted protein acidic and rich in cysteine Ca binding region
TraesCS1D02G239800	13.1133	44.8042	-1.7726	-	GO:0005737;GO:0005544;GO:000550	CC:cytoplasm;MF:calcium-dependent phospholipid binding;MF:calcium ion binding;	K17098	ANNAT	------	------	ENOG410XPUN	S:Function unknown	KAF6989979.1	hypothetical protein CFC21_007244 [Triticum aestivum]	sp|Q9ZVJ6|ANXD4_ARATH;	Annexin D4 OS=Arabidopsis thaliana OX=3702 GN=ANN4 PE=1 SV=1;	PF00191.22	Annexin	Annexin
TraesCS1D02G241300	4.5725	1.91083	1.25878	-	GO:0045893;GO:0005634;GO:000367	BP:positive regulation of transcription, DNA-templated;CC:nucleus;MF:DNA binding;	------	------	------	------	ENOG411073F;ENOG4111TEK	S:Function unknown;	KAF6995671.1	hypothetical protein CFC21_012125 [Triticum aestivum]	sp|Q94CK9|LRP1_ARATH;	Protein LATERAL ROOT PRIMORDIUM 1 OS=Arabidopsis thaliana OX=3702 GN=LRP1 PE=1 SV=1;	PF05142.14;PF06583.14	DUF702;Neogenin_C	Domain of unknown function;Neogenin C-terminus
TraesCS1D02G241400	7.7975	1.77167	2.1379	-	GO:000368	MF:chromatin binding;	------	------	------	------	ENOG410ZNBY	S:Function unknown	KAF6995672.1	hypothetical protein CFC21_012126 [Triticum aestivum]	------	------	PF16719.7	SAWADEE	SAWADEE domain
TraesCS1D02G245400	2.10083	0.834167	1.33255	-	GO:0080188;GO:0070615;GO:000552	BP:RNA-directed DNA methylation;MF:nucleosome-dependent ATPase activity;MF:ATP binding;	K10875	RAD54L, RAD54	map03440	Homologous recombination	COG0553	L:Replication, recombination and repair	XP_040242371.1	SNF2 domain-containing protein CLASSY 1 [Aegilops tauschii subsp. strangulata]	sp|F4I8S3|CLSY3_ARATH;	SNF2 domain-containing protein CLASSY 3 OS=Arabidopsis thaliana OX=3702 GN=CLSY3 PE=1 SV=1;	PF00176.25;PF00271.33;PF04851.17	SNF2-rel_dom;Helicase_C;ResIII	SNF2-related domain;Helicase conserved C-terminal domain;Type III restriction enzyme, res subunit
TraesCS1D02G247400	7.60417	1.41417	2.42684	-	------	------	------	------	------	------	------	------	XP_020151513.1	uncharacterized protein LOC109736716 [Aegilops tauschii subsp. strangulata]	------	------	------	------	------
TraesCS1D02G247700	3.12417	6.575	-1.07352	-	------	------	------	------	------	------	ENOG410ZH4A	S:Function unknown	KAF6995739.1	hypothetical protein CFC21_012190 [Triticum aestivum]	------	------	------	------	------
TraesCS1D02G248500	0.5	1.34167	-1.42403	-	GO:000819	MF:UDP-glycosyltransferase activity;	------	------	------	------	COG1819	S:Function unknown	XP_020192474.1	anthocyanidin 3-O-glucosyltransferase 2 [Aegilops tauschii subsp. strangulata]	sp|D3UAG0|U71K1_MALDO;	UDP-glycosyltransferase 71K1 OS=Malus domestica OX=3750 GN=UGT71K1 PE=1 SV=1;	PF00201.20	UDPGT	UDP-glucoronosyl and UDP-glucosyl transferase
TraesCS1D02G249600	16.6167	5.94083	1.48389	-	GO:0005975;GO:0016998;GO:0000272;GO:0050832;GO:0006032;GO:0008061;GO:000456	BP:carbohydrate metabolic process;BP:cell wall macromolecule catabolic process;BP:polysaccharide catabolic process;BP:defense response to fungus;BP:chitin catabolic process;MF:chitin binding;MF:chitinase activity;	K20547	CHIB	map00520;map04016	Amino sugar and nucleotide sugar metabolism;MAPK signaling pathway - plant	COG3979	G:Carbohydrate transport and metabolism	XP_020192462.1	chitinase 2-like [Aegilops tauschii subsp. strangulata]	sp|Q7DNA1|CHI2_ORYSJ;	Chitinase 2 OS=Oryza sativa subsp. japonica OX=39947 GN=Cht2 PE=1 SV=1;	PF00182.21;PF00187.21	Glyco_hydro_19;Chitin_bind_1	Chitinase class I;Chitin recognition protein
TraesCS1D02G253200	4.19667	1.3575	1.62829	-	GO:1902600;GO:0016021;GO:0016020;GO:0009678;GO:000442	BP:hydrogen ion transmembrane transport;CC:integral component of membrane;CC:membrane;MF:hydrogen-translocating pyrophosphatase activity;MF:inorganic diphosphatase activity;	K23025	AVP	------	------	COG3808	C:Energy production and conversion	KAF6995820.1	hypothetical protein CFC21_012260 [Triticum aestivum]	sp|Q06572|AVP_HORVU;	Pyrophosphate-energized vacuolar membrane proton pump OS=Hordeum vulgare OX=4513 PE=2 SV=2;	PF03030.18	H_PPase	Inorganic H+ pyrophosphatase
TraesCS1D02G255100	1.77833	3.56833	-1.00472	Similar to 1-deoxy-D-xylulose-5-phosphate synthase [Source: Projected from Oryza sativa (Os05g0408900)]	GO:0052865;GO:0009228;GO:0015995;GO:0016114;GO:0009570;GO:0009507;GO:0046872;GO:0008661;GO:0003824;GO:001674	BP:1-deoxy-D-xylulose 5-phosphate biosynthetic process;BP:thiamine biosynthetic process;BP:chlorophyll biosynthetic process;BP:terpenoid biosynthetic process;CC:chloroplast stroma;CC:chloroplast;MF:metal ion binding;MF:1-deoxy-D-xylulose-5-phosphate synthase activity;MF:catalytic activity;MF:transferase activity, transferring aldehyde or ketonic groups;	K01662	dxs	map00730;map00900	Thiamine metabolism;Terpenoid backbone biosynthesis	COG1154	H:Coenzyme transport and metabolism	KAF6995863.1	hypothetical protein CFC21_012291 [Triticum aestivum]	sp|O22567|DXS1_ORYSJ;	1-deoxy-D-xylulose-5-phosphate synthase 1, chloroplastic OS=Oryza sativa subsp. japonica OX=39947 GN=CLA1 PE=2 SV=2;	PF13292.8;PF02779.26;PF02780.22;PF02775.23;PF00676.22;PF00456.23	DXP_synthase_N;Transket_pyr;Transketolase_C;TPP_enzyme_C;E1_dh;Transketolase_N	1-deoxy-D-xylulose-5-phosphate synthase;Transketolase, pyrimidine binding domain;Transketolase, C-terminal domain;Thiamine pyrophosphate enzyme, C-terminal TPP binding domain;Dehydrogenase E1 component;Transketolase, thiamine diphosphate binding domain
TraesCS1D02G256500	0.5375	0.005	6.74819	-	GO:0051301;GO:0016021;GO:0016887;GO:000552	BP:cell division;CC:integral component of membrane;MF:ATPase activity;MF:ATP binding;	------	------	------	------	COG0464;COG0465	O:Posttranslational modification, protein turnover, chaperones;	XP_020181645.1	AAA-ATPase ASD, mitochondrial [Aegilops tauschii subsp. strangulata]	sp|Q9FLD5|ASD_ARATH;	AAA-ATPase ASD, mitochondrial OS=Arabidopsis thaliana OX=3702 GN=AATP1 PE=1 SV=1;	PF14363.8;PF00004.31	AAA_assoc;AAA	Domain associated at C-terminal with AAA;ATPase family associated with various cellular activities
TraesCS1D02G264000	4.0725	1.565	1.37975	Pectinesterase [Source:UniProtKB/TrEMBL;Acc:A0A1D5SZZ7]	GO:0042545;GO:0045490;GO:0005618;GO:0005576;GO:0046910;GO:0030599;GO:0045330;GO:000485	BP:cell wall modification;BP:pectin catabolic process;CC:cell wall;CC:extracellular region;MF:pectinesterase inhibitor activity;MF:pectinesterase activity;MF:aspartyl esterase activity;MF:enzyme inhibitor activity;	K01051	E3.1.1.11	map00040	Pentose and glucuronate interconversions	COG4677	G:Carbohydrate transport and metabolism	XP_020166640.1	pectinesterase [Aegilops tauschii subsp. strangulata]	sp|Q8RXK7|PME41_ARATH;	Probable pectinesterase/pectinesterase inhibitor 41 OS=Arabidopsis thaliana OX=3702 GN=PME41 PE=2 SV=2;	PF01095.21;PF04043.17	Pectinesterase;PMEI	Pectinesterase;Plant invertase/pectin methylesterase inhibitor
TraesCS1D02G266200	1.78	6.53167	-1.87557	-	GO:0006629;GO:0016042;GO:000897	BP:lipid metabolic process;BP:lipid catabolic process;MF:phosphatidylcholine 1-acylhydrolase activity;	------	------	------	------	COG3675;ENOG410XUZA	S:Function unknown;	XP_020169603.1	phospholipase A1-II 7 [Aegilops tauschii subsp. strangulata]	sp|A2Y7R2|PLA7_ORYSI;	Phospholipase A1-II 7 OS=Oryza sativa subsp. indica OX=39946 GN=OsI_21081 PE=3 SV=1;	PF01764.27;PF05057.16	Lipase_3;DUF676	Lipase;Putative serine esterase
TraesCS1D02G268500	10.0542	26.1658	-1.37989	-	GO:0010438;GO:0005737;GO:0016491;GO:007040	BP:cellular response to sulfur starvation;CC:cytoplasm;MF:oxidoreductase activity;MF:NADPH binding;	K23050	PCBER1	------	------	ENOG410Y0DY	S:Function unknown	XP_020157388.1	isoflavone reductase homolog IRL [Aegilops tauschii subsp. strangulata]	sp|P52580|IFRH_MAIZE;	Isoflavone reductase homolog IRL OS=Zea mays OX=4577 GN=IRL PE=2 SV=1;	PF05368.15;PF13460.8;PF01370.23;PF01073.21;PF03435.20	NmrA;NAD_binding_10;Epimerase;3Beta_HSD;Sacchrp_dh_NADP	NmrA-like family;NA;NAD dependent epimerase/dehydratase family;3-beta hydroxysteroid dehydrogenase/isomerase family;Saccharopine dehydrogenase NADP binding domain
TraesCS1D02G271300	0.076667	0.790833	-3.3667	-	GO:001602	CC:integral component of membrane;	------	------	------	------	ENOG41120RW	S:Function unknown	KAF6996065.1	hypothetical protein CFC21_012459 [Triticum aestivum]	------	------	PF06749.14;PF04657.15	DUF1218;DMT_YdcZ	Protein of unknown function;Putative inner membrane exporter, YdcZ
TraesCS1D02G272200	8.62	3.42917	1.32983	-	------	------	------	------	------	------	------	------	XP_020161890.1	myristoylated alanine-rich C-kinase substrate [Aegilops tauschii subsp. strangulata]	------	------	------	------	------
TraesCS1D02G273600	0.3275	0.094167	1.7982	-	GO:0006468;GO:0016021;GO:0005524;GO:000467	BP:protein phosphorylation;CC:integral component of membrane;MF:ATP binding;MF:protein kinase activity;	------	------	------	------	COG0515	T:Signal transduction mechanisms	KAF6996085.1	hypothetical protein CFC21_012479 [Triticum aestivum]	sp|Q8W4G6|CRK15_ARATH;	Cysteine-rich receptor-like protein kinase 15 OS=Arabidopsis thaliana OX=3702 GN=CRK15 PE=2 SV=2;	PF07714.19;PF00069.27;PF01657.19	PK_Tyr_Ser-Thr;Pkinase;Stress-antifung	Protein tyrosine and serine/threonine kinase;Protein kinase domain;Salt stress response/antifungal
TraesCS1D02G273800	4.57	1.20083	1.92816	-	GO:0006468;GO:0016021;GO:0005524;GO:000467	BP:protein phosphorylation;CC:integral component of membrane;MF:ATP binding;MF:protein kinase activity;	------	------	------	------	COG0515	T:Signal transduction mechanisms	KAF6996092.1	hypothetical protein CFC21_012481, partial [Triticum aestivum]	sp|O65468|CRK8_ARATH;	Cysteine-rich receptor-like protein kinase 8 OS=Arabidopsis thaliana OX=3702 GN=CRK8 PE=3 SV=2;	PF00069.27;PF07714.19;PF01657.19	Pkinase;PK_Tyr_Ser-Thr;Stress-antifung	Protein kinase domain;Protein tyrosine and serine/threonine kinase;Salt stress response/antifungal
TraesCS1D02G277700	5.48417	2.69167	1.02677	-	------	------	------	------	------	------	ENOG41115NE	S:Function unknown	KAF6996136.1	hypothetical protein CFC21_012512 [Triticum aestivum]	------	------	------	------	------
TraesCS1D02G277900	12.3542	5.705	1.1147	-	GO:0006396;GO:000551	BP:RNA processing;MF:protein binding;	------	------	------	------	ENOG4111RQ5	S:Function unknown	XP_020154937.1	uncharacterized protein LOC109740307 [Aegilops tauschii subsp. strangulata]	------	------	PF14559.8;PF13432.8;PF13428.8	TPR_19;TPR_16;TPR_14	Tetratricopeptide repeat;Tetratricopeptide repeat;Tetratricopeptide repeat
TraesCS1D02G278100	0.9425	3.40333	-1.85238	-	GO:001674	MF:transferase activity, transferring acyl groups other than amino-acyl groups;	------	------	------	------	ENOG410YADF	S:Function unknown	KAF6996140.1	hypothetical protein CFC21_012516 [Triticum aestivum]	sp|Q9SND9|Y3028_ARATH;	Uncharacterized acetyltransferase At3g50280 OS=Arabidopsis thaliana OX=3702 GN=At3g50280 PE=3 SV=1;	PF02458.17	Transferase	Transferase family
TraesCS1D02G278300	5.21333	10.1283	-0.958119	-	GO:0005975;GO:0005576;GO:0102483;GO:0008422;GO:000455	BP:carbohydrate metabolic process;CC:extracellular region;MF:scopolin beta-glucosidase activity;MF:beta-glucosidase activity;MF:hydrolase activity, hydrolyzing O-glycosyl compounds;	K05349	bglX	map00460;map00940;map00500	Cyanoamino acid metabolism;Phenylpropanoid biosynthesis;Starch and sucrose metabolism	COG1472	G:Carbohydrate transport and metabolism	KAF6984955.1	hypothetical protein CFC21_002887 [Triticum aestivum]	sp|A7LXU3|BGH3B_BACO1;	Beta-glucosidase BoGH3B OS=Bacteroides ovatus;	PF00933.23;PF01915.24	Glyco_hydro_3;Glyco_hydro_3_C	Glycosyl hydrolase family 3 N terminal domain;Glycosyl hydrolase family 3 C-terminal domain
TraesCS1D02G279800	8.93083	22.9758	-1.36325	-	------	------	------	------	------	------	ENOG410YI8C	T:Signal transduction mechanisms	XP_020184864.1	universal stress protein PHOS32 [Aegilops tauschii subsp. strangulata]	sp|Q8VYN9|PHO32_ARATH;	Universal stress protein PHOS32 OS=Arabidopsis thaliana OX=3702 GN=PHOS32 PE=1 SV=1;	PF00582.28	Usp	Universal stress protein family
TraesCS1D02G284000	213.127	8.66417	4.62051	HSP70 [Source:UniProtKB/TrEMBL;Acc:Q9SAU8]	GO:0042026;GO:0034620;GO:0051085;GO:0005737;GO:0031072;GO:0044183;GO:0051082;GO:0000166;GO:0016887;GO:0051787;GO:000552	BP:protein refolding;BP:cellular response to unfolded protein;BP:chaperone mediated protein folding requiring cofactor;CC:cytoplasm;MF:heat shock protein binding;MF:protein binding involved in protein folding;MF:unfolded protein binding;MF:nucleotide binding;MF:ATPase activity;MF:misfolded protein binding;MF:ATP binding;	K03283	HSPA1s	map04144;map04141;map03040	Endocytosis;Protein processing in endoplasmic reticulum;Spliceosome	COG0443	O:Posttranslational modification, protein turnover, chaperones	XP_020159806.1	heat shock 70 kDa protein 4 [Aegilops tauschii subsp. strangulata]	sp|Q9LHA8|HS704_ARATH;	Heat shock 70 kDa protein 4 OS=Arabidopsis thaliana OX=3702 GN=HSP70-4 PE=1 SV=1;	PF00012.22;PF06723.15	HSP70;MreB_Mbl	Hsp70 protein;MreB/Mbl protein
TraesCS1D02G285500	0.414167	1.00833	-1.28369	-	GO:001674	MF:transferase activity, transferring acyl groups other than amino-acyl groups;	------	------	------	------	ENOG410YEZS	S:Function unknown	KAF6996217.1	hypothetical protein CFC21_012584 [Triticum aestivum]	sp|Q9SND9|Y3028_ARATH;	Uncharacterized acetyltransferase At3g50280 OS=Arabidopsis thaliana OX=3702 GN=At3g50280 PE=3 SV=1;	PF02458.17	Transferase	Transferase family
TraesCS1D02G285900	0.511667	3.53917	-2.79013	-	------	------	------	------	------	------	ENOG411080G;ENOG41107F8	S:Function unknown;	XP_020162976.1	uncharacterized protein LOC109748351 [Aegilops tauschii subsp. strangulata]	------	------	------	------	------
TraesCS1D02G286800	0.043333	0.3225	-2.89576	-	GO:0006468;GO:0005524;GO:000467	BP:protein phosphorylation;MF:ATP binding;MF:protein kinase activity;	------	------	------	------	COG0515	T:Signal transduction mechanisms	KAF6996238.1	hypothetical protein CFC21_012600 [Triticum aestivum]	sp|F4JEQ2|PBL23_ARATH;	Probable serine/threonine-protein kinase PBL23 OS=Arabidopsis thaliana OX=3702 GN=PBL23 PE=2 SV=1;	PF07714.19;PF00069.27	PK_Tyr_Ser-Thr;Pkinase	Protein tyrosine and serine/threonine kinase;Protein kinase domain
TraesCS1D02G289100	10.0617	1.64	2.6171	-	GO:0046658;GO:0016021;GO:000905	CC:anchored component of plasma membrane;CC:integral component of membrane;MF:electron carrier activity;	------	------	------	------	ENOG410YT2D	S:Function unknown	KAF6996270.1	hypothetical protein CFC21_012624 [Triticum aestivum]	sp|O82081|UCC1_ARATH;	Uclacyanin 1 OS=Arabidopsis thaliana OX=3702 GN=UCC1 PE=1 SV=1;	PF02298.19	Cu_bind_like	Plastocyanin-like domain
TraesCS1D02G292700	9.9925	4.67583	1.09562	-	GO:0006355;GO:0005634;GO:0003700;GO:004356	BP:regulation of transcription, DNA-templated;CC:nucleus;MF:transcription factor activity, sequence-specific DNA binding;MF:sequence-specific DNA binding;	K13424	WRKY33	map04016;map04626	MAPK signaling pathway - plant;Plant-pathogen interaction	ENOG410YHVA;ENOG4112BTF	K:Transcription;	KAF6996312.1	hypothetical protein CFC21_012659 [Triticum aestivum]	sp|Q6IEQ7|WRK24_ORYSJ;	WRKY transcription factor WRKY24 OS=Oryza sativa subsp. japonica OX=39947 GN=WRKY24 PE=2 SV=1;	PF03106.17	WRKY	WRKY DNA -binding domain
TraesCS1D02G293900	0.8925	0.354167	1.33342	-	GO:0030001;GO:0071577;GO:0006829;GO:0055085;GO:0016021;GO:0016020;GO:0005886;GO:0005385;GO:004687	BP:metal ion transport;BP:zinc II ion transmembrane transport;BP:zinc II ion transport;BP:transmembrane transport;CC:integral component of membrane;CC:membrane;CC:plasma membrane;MF:zinc ion transmembrane transporter activity;MF:metal ion transmembrane transporter activity;	K14709	SLC39A1_2_3, ZIP1_2_3	------	------	ENOG4111GP2	P:Inorganic ion transport and metabolism	XP_020166689.1	zinc transporter 5 [Aegilops tauschii subsp. strangulata]	sp|Q6L8G0|ZIP5_ORYSJ;	Zinc transporter 5 OS=Oryza sativa subsp. japonica OX=39947 GN=ZIP5 PE=2 SV=1;	PF02535.24	Zip	ZIP Zinc transporter
TraesCS1D02G296700	6.955	2.43917	1.51166	-	------	------	------	------	------	------	ENOG410Z7H4	S:Function unknown	XP_020166672.1	uncharacterized protein LOC109752183 [Aegilops tauschii subsp. strangulata]	------	------	PF05553.13	DUF761	Cotton fibre expressed protein
TraesCS1D02G302900	1.06667	6.7025	-2.65159	Patatin [Source:UniProtKB/TrEMBL;Acc:W5AF95]	GO:0006629;GO:0016042;GO:001678	BP:lipid metabolic process;BP:lipid catabolic process;MF:hydrolase activity;	------	------	------	------	COG3621	S:Function unknown	KAF6996430.1	hypothetical protein CFC21_012772 [Triticum aestivum]	sp|B8AQW7|PLP1_ORYSI;	Patatin-like protein 1 OS=Oryza sativa subsp. indica OX=39946 GN=PLP1 PE=3 SV=1;	PF01734.24	Patatin	Patatin-like phospholipase
TraesCS1D02G303100	2.24417	4.905	-1.12807	-	------	------	------	------	------	------	ENOG410YC6J;ENOG4111AYF	S:Function unknown;	XP_020187561.1	protein LURP-one-related 8 [Aegilops tauschii subsp. strangulata]	sp|Q9ZVI6|LOR8_ARATH;	Protein LURP-one-related 8 OS=Arabidopsis thaliana OX=3702 GN=At2g38640 PE=2 SV=1;	PF04525.14	LOR	LURP-one-related
TraesCS1D02G304100	0.129167	1.6225	-3.65091	Peroxidase [Source:UniProtKB/TrEMBL;Acc:A0A1D5STK1]	GO:0006979;GO:0042744;GO:0005576;GO:0020037;GO:0046872;GO:000460	BP:response to oxidative stress;BP:hydrogen peroxide catabolic process;CC:extracellular region;MF:heme binding;MF:metal ion binding;MF:peroxidase activity;	K00430	E1.11.1.7	map00940	Phenylpropanoid biosynthesis	ENOG41104SB	S:Function unknown	KAF6996441.1	hypothetical protein CFC21_012782 [Triticum aestivum]	sp|Q9FEQ8|PER2_MAIZE;	Peroxidase 2 OS=Zea mays OX=4577 GN=PER2 PE=2 SV=1;	PF00141.25	peroxidase	Peroxidase
TraesCS1D02G304200	0.058333	0.853333	-3.87072	Peroxidase [Source:UniProtKB/TrEMBL;Acc:A0A341PXL5]	GO:0006979;GO:0098869;GO:0042744;GO:0005576;GO:0020037;GO:0046872;GO:0004601;GO:001649	BP:response to oxidative stress;BP:cellular oxidant detoxification;BP:hydrogen peroxide catabolic process;CC:extracellular region;MF:heme binding;MF:metal ion binding;MF:peroxidase activity;MF:oxidoreductase activity;	K00430	E1.11.1.7	map00940	Phenylpropanoid biosynthesis	ENOG41104SB	S:Function unknown	KAF6996442.1	hypothetical protein CFC21_012783 [Triticum aestivum]	sp|Q9FEQ8|PER2_MAIZE;	Peroxidase 2 OS=Zea mays OX=4577 GN=PER2 PE=2 SV=1;	PF00141.25	peroxidase	Peroxidase
TraesCS1D02G304300	0.058333	0.853333	-3.87072	Peroxidase [Source:UniProtKB/TrEMBL;Acc:A0A341PXL5]	GO:0006979;GO:0098869;GO:0042744;GO:0005576;GO:0020037;GO:0046872;GO:0004601;GO:001649	BP:response to oxidative stress;BP:cellular oxidant detoxification;BP:hydrogen peroxide catabolic process;CC:extracellular region;MF:heme binding;MF:metal ion binding;MF:peroxidase activity;MF:oxidoreductase activity;	K00430	E1.11.1.7	map00940	Phenylpropanoid biosynthesis	ENOG41104SB	S:Function unknown	KAF6996442.1	hypothetical protein CFC21_012783 [Triticum aestivum]	sp|Q9FEQ8|PER2_MAIZE;	Peroxidase 2 OS=Zea mays OX=4577 GN=PER2 PE=2 SV=1;	PF00141.25	peroxidase	Peroxidase
TraesCS1D02G304500	0.118333	1.17917	-3.31684	Peroxidase [Source:UniProtKB/TrEMBL;Acc:A0A341PNN4]	GO:0006979;GO:0042744;GO:0005576;GO:0020037;GO:0046872;GO:000460	BP:response to oxidative stress;BP:hydrogen peroxide catabolic process;CC:extracellular region;MF:heme binding;MF:metal ion binding;MF:peroxidase activity;	K00430	E1.11.1.7	map00940	Phenylpropanoid biosynthesis	ENOG41104SB	S:Function unknown	KAF6996457.1	hypothetical protein CFC21_012792 [Triticum aestivum]	sp|Q9FEQ8|PER2_MAIZE;	Peroxidase 2 OS=Zea mays OX=4577 GN=PER2 PE=2 SV=1;	PF00141.25	peroxidase	Peroxidase
TraesCS1D02G307600	1.66333	0.186667	3.15554	-	GO:0008115;GO:001649	MF:sarcosine oxidase activity;MF:oxidoreductase activity;	K00306	PIPOX	map04146;map00310;map00260	Peroxisome;Lysine degradation;Glycine, serine and threonine metabolism	COG0665	E:Amino acid transport and metabolism	XP_020181633.1	probable sarcosine oxidase [Aegilops tauschii subsp. strangulata]	sp|Q9SJA7|SOX_ARATH;	Probable sarcosine oxidase OS=Arabidopsis thaliana OX=3702 GN=At2g24580 PE=2 SV=1;	PF01266.26;PF12831.9;PF01593.26;PF03486.16;PF13450.8;PF01134.24;PF00890.26	DAO;FAD_oxidored;Amino_oxidase;HI0933_like;NAD_binding_8;GIDA;FAD_binding_2	FAD dependent oxidoreductase;FAD dependent oxidoreductase;Flavin containing amine oxidoreductase;HI0933-like protein;NA;Glucose inhibited division protein A;FAD binding domain
TraesCS1D02G309900	7.4025	18.0975	-1.28971	-	GO:0005542;GO:001674	MF:folic acid binding;MF:transferase activity;	------	------	------	------	COG3643	E:Amino acid transport and metabolism	XP_020166552.1	uncharacterized protein LOC109752097 [Aegilops tauschii subsp. strangulata]	sp|Q9HI69|GLFT_THEAC;	Glutamate formimidoyltransferase OS=Thermoplasma acidophilum;	PF07837.14	FTCD_N	Formiminotransferase domain, N-terminal subdomain
TraesCS1D02G312600	1.43417	0.655	1.13065	Glycerol-3-phosphate dehydrogenase [NAD(+)] [Source:UniProtKB/TrEMBL;Acc:A0A341PQJ5]	GO:0005975;GO:0046168;GO:0006116;GO:0006072;GO:0009331;GO:0005829;GO:0004367;GO:0016616;GO:0051287;GO:001649	BP:carbohydrate metabolic process;BP:glycerol-3-phosphate catabolic process;BP:NADH oxidation;BP:glycerol-3-phosphate metabolic process;CC:glycerol-3-phosphate dehydrogenase complex;CC:cytosol;MF:glycerol-3-phosphate dehydrogenase [NAD+] activity;MF:oxidoreductase activity, acting on the CH-OH group of donors, NAD or NADP as acceptor;MF:NAD binding;MF:oxidoreductase activity;	K00006	GPD1	map00564	Glycerophospholipid metabolism	COG0240	C:Energy production and conversion	KAF6996538.1	hypothetical protein CFC21_012866 [Triticum aestivum]	sp|Q65X70|GPDH3_ORYSJ;	Probable glycerol-3-phosphate dehydrogenase [NA;	PF07479.16;PF01210.25	NAD_Gly3P_dh_C;NAD_Gly3P_dh_N	NAD-dependent glycerol-3-phosphate dehydrogenase C-terminus;NAD-dependent glycerol-3-phosphate dehydrogenase N-terminus
TraesCS1D02G312800	1.9175	5.6875	-1.56857	-	GO:0005975;GO:0016021;GO:000455	BP:carbohydrate metabolic process;CC:integral component of membrane;MF:hydrolase activity, hydrolyzing O-glycosyl compounds;	------	------	------	------	ENOG410YFZD	G:Carbohydrate transport and metabolism	XP_020197920.1	putative glucan endo-1,3-beta-glucosidase GVI isoform X1 [Aegilops tauschii subsp. strangulata]	sp|Q02439|E13F_HORVU;	Putative glucan endo-1,3-beta-glucosidase GVI;	PF00332.20	Glyco_hydro_17	Glycosyl hydrolases family 17
TraesCS1D02G314800	27.7725	12.3592	1.16808	Ethylene-responsive factor-like transcription factor ERFL2b [Source:UniProtKB/TrEMBL;Acc:A7XA03]	GO:0009414;GO:0009651;GO:0009733;GO:0010311;GO:0009737;GO:0009735;GO:0080027;GO:0009611;GO:0010337;GO:0010728;GO:0045892;GO:0009409;GO:0009751;GO:0010364;GO:0080113;GO:0009753;GO:2000068;GO:0009625;GO:0009723;GO:0006355;GO:0006351;GO:0080141;GO:0005634;GO:0003677;GO:0043565;GO:0003700;GO:000097	BP:response to water deprivation;BP:response to salt stress;BP:response to auxin;BP:lateral root formation;BP:response to abscisic acid;BP:response to cytokinin;BP:response to herbivore;BP:response to wounding;BP:regulation of salicylic acid metabolic process;BP:regulation of hydrogen peroxide biosynthetic process;BP:negative regulation of transcription, DNA-templated;BP:response to cold;BP:respo…	K09286	EREBP	------	------	ENOG410YQNQ;ENOG410YQ8J	K:Transcription;	XP_020193348.1	LOW QUALITY PROTEIN: ethylene-responsive transcription factor 8 [Aegilops tauschii subsp. strangulata]	sp|Q40477|ERF4_TOBAC;	Ethylene-responsive transcription factor 4 OS=Nicotiana tabacum OX=4097 GN=ERF4 PE=1 SV=1;	PF00847.22	AP2	AP2 domain
TraesCS1D02G319700	1.30583	0.076667	4.09022	-	GO:0046872;GO:001649	MF:metal ion binding;MF:oxidoreductase activity;	------	------	------	------	COG3491	S:Function unknown	KAF7002428.1	hypothetical protein CFC21_017922 [Triticum aestivum]	sp|Q9M547|FLS_EUSER;	Flavonol synthase/flavanone 3-hydroxylase OS=Eustoma exaltatum subsp. russellianum OX=52518 GN=FLS PE=2 SV=1;	PF03171.22;PF14226.8	2OG-FeII_Oxy;DIOX_N	2OG-F;non-haem dioxygenase in morphine synthesis N-terminal
TraesCS1D02G325300	2.28333	4.6725	-1.03305	-	GO:0009658;GO:0010438;GO:0010439;GO:0009579;GO:0009536;GO:000551	BP:chloroplast organization;BP:cellular response to sulfur starvation;BP:regulation of glucosinolate biosynthetic process;CC:thylakoid;CC:plastid;MF:protein binding;	------	------	------	------	ENOG410YFAS	S:Function unknown	KAF6996697.1	hypothetical protein CFC21_013008 [Triticum aestivum]	sp|Q8GXU5|SDI1_ARATH;	Protein SULFUR DEFICIENCY-INDUCED 1 OS=Arabidopsis thaliana OX=3702 GN=SDI1 PE=2 SV=1;	PF13181.8;PF07719.19;PF00515.30;PF13424.8;PF13176.8;PF13374.8;PF13432.8;PF12895.9	TPR_8;TPR_2;TPR_1;TPR_12;TPR_7;TPR_10;TPR_16;ANAPC3	Tetratricopeptide repeat;Tetratricopeptide repeat;Tetratricopeptide repeat;Tetratricopeptide repeat;Tetratricopeptide repeat;Tetratricopeptide repeat;Tetratricopeptide repeat;Anaphase-promoting complex, cyclosome, subunit 3
TraesCS1D02G326300	2.15583	10.3417	-2.26215	-	------	------	------	------	------	------	ENOG411146M	S:Function unknown	KAF6996703.1	hypothetical protein CFC21_013014 [Triticum aestivum]	------	------	------	------	------
TraesCS1D02G326600	1.0725	4.42833	-2.04579	-	------	------	------	------	------	------	------	------	KAF6996710.1	hypothetical protein CFC21_013020 [Triticum aestivum]	------	------	------	------	------
TraesCS1D02G328100	0.584167	2.15583	-1.88379	-	GO:001602	CC:integral component of membrane;	------	------	------	------	ENOG410YCT3;ENOG41115RC	S:Function unknown;	XP_020156567.1	uncharacterized protein At4g15970 [Aegilops tauschii subsp. strangulata]	sp|P0C042|Y4597_ARATH;	Uncharacterized protein At4g15970 OS=Arabidopsis thaliana OX=3702 GN=At4g15970 PE=2 SV=1;	PF03407.18	Nucleotid_trans	Nucleotide-diphospho-sugar transferase
TraesCS1D02G334000	0.870833	2.42417	-1.47702	-	GO:0046872;GO:001649	MF:metal ion binding;MF:oxidoreductase activity;	------	------	------	------	COG3491	S:Function unknown	KAF6996790.1	hypothetical protein CFC21_013089 [Triticum aestivum]	sp|A2A1A0|NCS1_COPJA;	S-norcoclaurine synthase 1 OS=Coptis japonica OX=3442 GN=NCS1 PE=1 SV=1;	PF14226.8	DIOX_N	non-haem dioxygenase in morphine synthesis N-terminal
TraesCS1D02G334900	1.78417	0.350833	2.34639	-	GO:005108	MF:chaperone binding;	------	------	------	------	ENOG41108P8;ENOG411068T	S:Function unknown;	XP_020165975.1	uncharacterized protein LOC109751502 [Aegilops tauschii subsp. strangulata]	------	------	------	------	------
TraesCS1D02G335500	2.91083	0.425	2.7759	Calcium-transporting ATPase [Source:UniProtKB/TrEMBL;Acc:A0A341PYM6]	GO:0140603;GO:0070588;GO:0016021;GO:0016020;GO:0005215;GO:0000166;GO:0005516;GO:0005388;GO:000552	old GO;BP:calcium ion transmembrane transport;CC:integral component of membrane;CC:membrane;MF:transporter activity;MF:nucleotide binding;MF:calmodulin binding;MF:calcium-transporting ATPase activity;MF:ATP binding;	K01537	ATP2C	------	------	ENOG410XNNC	P:Inorganic ion transport and metabolism	XP_020165378.1	calcium-transporting ATPase 7, plasma membrane-type-like [Aegilops tauschii subsp. strangulata]	sp|Q7XEK4|ACA7_ORYSJ;	Calcium-transporting ATPase 7, plasma membrane-type OS=Oryza sativa subsp. japonica OX=39947 GN=ACA7 PE=2 SV=1;	PF00689.23;PF00122.22;PF00702.28;PF13246.8;PF00690.28;PF08282.14	Cation_ATPase_C;E1-E2_ATPase;Hydrolase;Cation_ATPase;Cation_ATPase_N;Hydrolase_3	Cation transporting ATPase, C-terminus;E1-E2 ATPase;haloacid dehalogenase-like hydrolase;Cation transport ATPase;Cation transporter/ATPase, N-terminus;haloacid dehalogenase-like hydrolase
TraesCS1D02G337500	2.51167	12.6075	-2.32757	-	GO:0032259;GO:0008168;GO:0046983;GO:000817	BP:methylation;MF:methyltransferase activity;MF:protein dimerization activity;MF:O-methyltransferase activity;	------	------	------	------	ENOG410XS7T	S:Function unknown	KAF6996827.1	hypothetical protein CFC21_013122 [Triticum aestivum]	sp|P47917|ZRP4_MAIZE;	O-methyltransferase ZRP4 OS=Zea mays OX=4577 GN=ZRP4 PE=2 SV=1;	PF00891.20;PF08100.13	Methyltransf_2;Dimerisation	O-methyltransferase domain;Dimerisation domain
TraesCS1D02G337700	1.38917	5.67583	-2.03061	-	GO:0032259;GO:0016021;GO:0008168;GO:0008171;GO:004698	BP:methylation;CC:integral component of membrane;MF:methyltransferase activity;MF:O-methyltransferase activity;MF:protein dimerization activity;	------	------	------	------	ENOG410XS7T	S:Function unknown	XP_020163974.1	O-methyltransferase ZRP4 [Aegilops tauschii subsp. strangulata]	sp|P47917|ZRP4_MAIZE;	O-methyltransferase ZRP4 OS=Zea mays OX=4577 GN=ZRP4 PE=2 SV=1;	PF00891.20;PF08100.13	Methyltransf_2;Dimerisation	O-methyltransferase domain;Dimerisation domain
TraesCS1D02G337800	1.465	6.65833	-2.18426	-	GO:0019438;GO:0032259;GO:0008757;GO:0008171;GO:0008168;GO:004698	BP:aromatic compound biosynthetic process;BP:methylation;MF:S-adenosylmethionine-dependent methyltransferase activity;MF:O-methyltransferase activity;MF:methyltransferase activity;MF:protein dimerization activity;	K22588	ASMT	map00380	Tryptophan metabolism	ENOG410XS7T	S:Function unknown	KAF6996829.1	hypothetical protein CFC21_013124 [Triticum aestivum]	sp|Q6EPG8|ASMT1_ORYSJ;	Acetylserotonin O-methyltransferase 1 OS=Oryza sativa subsp. japonica OX=39947 GN=ASMT1 PE=1 SV=1;	PF00891.20;PF08100.13	Methyltransf_2;Dimerisation	O-methyltransferase domain;Dimerisation domain
TraesCS1D02G338500	0.886667	0.078333	3.5007	-	GO:0005829;GO:000563	CC:cytosol;CC:nucleus;	------	------	------	------	ENOG4111T3A	S:Function unknown	EMS58933.1	hypothetical protein TRIUR3_06380 [Triticum urartu]	sp|Q13442|HAP28_HUMAN;	28 kDa heat- and acid-stable phosphoprotein OS=Homo sapiens OX=9606 GN=PDAP1 PE=1 SV=1;	PF10252.11	PP28	Casein kinase substrate phosphoprotein PP28
TraesCS1D02G340600	4.5125	14.7167	-1.70545	-	GO:0046872;GO:0005344;GO:0019825;GO:002003	MF:metal ion binding;MF:oxygen transporter activity;MF:oxygen binding;MF:heme binding;	------	------	------	------	COG1017;COG1018	C:Energy production and conversion;	XP_020161925.1	non-symbiotic hemoglobin isoform X1 [Aegilops tauschii subsp. strangulata]	sp|Q42831|HBL_HORVU;	Non-symbiotic hemoglobin OS=Hordeum vulgare OX=4513 GN=HB PE=1 SV=1;	PF00042.24	Globin	Globin
TraesCS1D02G340900	12.7308	5.60833	1.18268	-	GO:000563	CC:nucleus;	------	------	------	------	ENOG410YVV0;ENOG410YKTU	S:Function unknown;	XP_020161927.1	VQ motif-containing protein 4 [Aegilops tauschii subsp. strangulata]	sp|Q5M750|VQ4_ARATH;	VQ motif-containing protein 4 OS=Arabidopsis thaliana OX=3702 GN=VQ4 PE=1 SV=1;	PF05678.16	VQ	VQ motif
TraesCS1D02G342100	84.32	0.695833	6.92099	-	GO:0034605;GO:0005737;GO:0016887;GO:0005524;GO:000016	BP:cellular response to heat;CC:cytoplasm;MF:ATPase activity;MF:ATP binding;MF:nucleotide binding;	K03695	clpB	------	------	COG0542	O:Posttranslational modification, protein turnover, chaperones	XP_020155730.1	chaperone protein ClpB1 [Aegilops tauschii subsp. strangulata]	sp|Q6F2Y7|CLPB1_ORYSJ;	Chaperone protein ClpB1 OS=Oryza sativa subsp. japonica OX=39947 GN=CLPB1 PE=2 SV=1;	PF07724.16;PF17871.3;PF00004.31;PF10431.11;PF02861.22;PF07728.16;PF13401.8;PF13191.8;PF00158.28;PF20030.1;PF12775.9;PF05621.13	AAA_2;AAA_lid_9;AAA;ClpB_D2-small;Clp_N;AAA_5;AAA_22;AAA_16;Sigma54_activat;bpMoxR;AAA_7;TniB	AAA domain;AAA lid domain;ATPase family associated with various cellular activities;C-terminal, D2-small domain, of ClpB protein;Clp amino terminal domain, pathogenicity island component;AAA domain;AAA domain;AAA ATPase domain;Sigma-54 interaction domain;MoxR domain in the MoxR-vWA-beta-propeller ternary systems;P-loop containing dynein motor region;Bacterial TniB protein
TraesCS1D02G344700	24.6358	8.98583	1.45503	-	GO:0006468;GO:0016021;GO:0004674;GO:0005515;GO:0004672;GO:000552	BP:protein phosphorylation;CC:integral component of membrane;MF:protein serine/threonine kinase activity;MF:protein binding;MF:protein kinase activity;MF:ATP binding;	------	------	------	------	COG4886	S:Function unknown	KAF6996910.1	hypothetical protein CFC21_013187 [Triticum aestivum]	sp|Q9M0G7|MIK1_ARATH;	MDIS1-interacting receptor like kinase 1 OS=Arabidopsis thaliana OX=3702 GN=MIK1 PE=1 SV=1;	PF07714.19;PF00069.27;PF13855.8;PF12799.9;PF08263.14	PK_Tyr_Ser-Thr;Pkinase;LRR_8;LRR_4;LRRNT_2	Protein tyrosine and serine/threonine kinase;Protein kinase domain;Leucine rich repeat;Leucine Rich repeats;Leucine rich repeat N-terminal domain
TraesCS1D02G345300	0.500833	0.1775	1.49651	-	GO:0055085;GO:0016021;GO:0140359;GO:0042626;GO:000552	BP:transmembrane transport;CC:integral component of membrane;MF:ABC-type transmembrane transporter activity;MF:ATPase activity, coupled to transmembrane movement of substances;MF:ATP binding;	------	------	------	------	COG1131	V:Defense mechanisms	KAF6996916.1	hypothetical protein CFC21_013191 [Triticum aestivum]	sp|Q9STT5|AB7A_ARATH;	ABC transporter A family member 7 OS=Arabidopsis thaliana OX=3702 GN=ABCA7 PE=3 SV=2;	PF00005.29;PF12698.9;PF13304.8	ABC_tran;ABC2_membrane_3;AAA_21	ABC transporter;ABC-2 family transporter protein;AAA domain, putative AbiEii toxin, Type IV TA system
TraesCS1D02G345400	5.28417	11.9433	-1.17646	Auxin-responsive protein [Source:UniProtKB/TrEMBL;Acc:A0A1D5T0A9]	GO:0006355;GO:0006351;GO:0009734;GO:0005634;GO:000551	BP:regulation of transcription, DNA-templated;BP:transcription, DNA-templated;BP:auxin-activated signaling pathway;CC:nucleus;MF:protein binding;	K14484	IAA	map04075	Plant hormone signal transduction	ENOG410YI31	K:Transcription	XP_020191436.1	auxin-responsive protein IAA18 isoform X1 [Aegilops tauschii subsp. strangulata]	sp|Q5W670|IAA18_ORYSJ;	Auxin-responsive protein IAA18 OS=Oryza sativa subsp. japonica OX=39947 GN=IAA18 PE=2 SV=1;	PF02309.18	AUX_IAA	AUX/IAA family
TraesCS1D02G349900	2.01083	0.54	1.89676	-	GO:0009269;GO:001602	BP:response to desiccation;CC:integral component of membrane;	------	------	------	------	ENOG4110485;ENOG410YMTZ	S:Function unknown;	XP_020186651.1	uncharacterized protein LOC109772378 [Aegilops tauschii subsp. strangulata]	------	------	PF03168.15	LEA_2	Late embryogenesis abundant protein
TraesCS1D02G350900	8.69833	4.37167	0.992555	-	GO:0046658;GO:0016021;GO:000905	CC:anchored component of plasma membrane;CC:integral component of membrane;MF:electron carrier activity;	------	------	------	------	ENOG410YW92	S:Function unknown	XP_020186639.1	early nodulin-like protein 1 [Aegilops tauschii subsp. strangulata]	sp|Q9SK27|ENL1_ARATH;	Early nodulin-like protein 1 OS=Arabidopsis thaliana OX=3702 GN=At2g25060 PE=2 SV=2;	PF02298.19	Cu_bind_like	Plastocyanin-like domain
TraesCS1D02G354800	0.901667	3.38917	-1.91026	-	GO:007194	CC:cell periphery;	------	------	------	------	ENOG410ZDC2	S:Function unknown	XP_020153205.1	non-classical arabinogalactan protein 31 [Aegilops tauschii subsp. strangulata]	sp|Q9FZA2|AGP31_ARATH;	Non-classical arabinogalactan protein 31 OS=Arabidopsis thaliana OX=3702 GN=AGP31 PE=1 SV=1;	PF01190.19	Pollen_Ole_e_1	Pollen protein Ole e 1 like
TraesCS1D02G355300	0.013333	0.129167	-3.27616	-	GO:0006468;GO:0007166;GO:0016021;GO:0005886;GO:0030247;GO:0004674;GO:0005509;GO:0004672;GO:000552	BP:protein phosphorylation;BP:cell surface receptor signaling pathway;CC:integral component of membrane;CC:plasma membrane;MF:polysaccharide binding;MF:protein serine/threonine kinase activity;MF:calcium ion binding;MF:protein kinase activity;MF:ATP binding;	------	------	------	------	COG0515	T:Signal transduction mechanisms	KAF6997034.1	hypothetical protein CFC21_013295 [Triticum aestivum]	sp|Q9LMN7|WAK5_ARATH;	Wall-associated receptor kinase 5 OS=Arabidopsis thaliana OX=3702 GN=WAK5 PE=2 SV=1;	PF00069.27;PF07714.19;PF13947.8	Pkinase;PK_Tyr_Ser-Thr;GUB_WAK_bind	Protein kinase domain;Protein tyrosine and serine/threonine kinase;Wall-associated receptor kinase galacturonan-binding
TraesCS1D02G361500	0.8975	1.885	-1.07058	-	GO:0046856;GO:0003824;GO:0016791;GO:001678	BP:phosphatidylinositol dephosphorylation;MF:catalytic activity;MF:phosphatase activity;MF:hydrolase activity;	------	------	------	------	COG5411	T:Signal transduction mechanisms	KAF6997097.1	hypothetical protein CFC21_013351 [Triticum aestivum]	sp|Q84MA2|IP5P1_ARATH;	Type I inositol polyphosphate 5-phosphatase 1 OS=Arabidopsis thaliana OX=3702 GN=IP5P1 PE=1 SV=2;	PF03372.25	Exo_endo_phos	Endonuclease/Exonuclease/phosphatase family
TraesCS1D02G362900	4.6225	1.125	2.03875	-	GO:0006355;GO:0005634;GO:0003700;GO:004356	BP:regulation of transcription, DNA-templated;CC:nucleus;MF:transcription factor activity, sequence-specific DNA binding;MF:sequence-specific DNA binding;	------	------	------	------	ENOG410YQZM	K:Transcription	XP_020192531.1	probable WRKY transcription factor 51 [Aegilops tauschii subsp. strangulata]	sp|Q93WU9|WRK51_ARATH;	Probable WRKY transcription factor 51 OS=Arabidopsis thaliana OX=3702 GN=WRKY51 PE=1 SV=1;	PF03106.17	WRKY	WRKY DNA -binding domain
TraesCS1D02G363300	10.0608	2.315	2.11967	WRKY51 transcriptional factor [Source:UniProtKB/TrEMBL;Acc:A0A0M4CLZ5]	GO:0006355;GO:0050896;GO:0005634;GO:0043565;GO:0003700;GO:000367	BP:regulation of transcription, DNA-templated;BP:response to stimulus;CC:nucleus;MF:sequence-specific DNA binding;MF:transcription factor activity, sequence-specific DNA binding;MF:DNA binding;	------	------	------	------	ENOG410YQZM	K:Transcription	XP_020147509.1	probable WRKY transcription factor 57 [Aegilops tauschii subsp. strangulata]	sp|Q93WU9|WRK51_ARATH;	Probable WRKY transcription factor 51 OS=Arabidopsis thaliana OX=3702 GN=WRKY51 PE=1 SV=1;	PF03106.17	WRKY	WRKY DNA -binding domain
TraesCS1D02G367700	0.444167	0.035833	3.63174	-	GO:0048587;GO:0006355;GO:0048586;GO:0005634;GO:004698	BP:regulation of short-day photoperiodism, flowering;BP:regulation of transcription, DNA-templated;BP:regulation of long-day photoperiodism, flowering;CC:nucleus;MF:protein dimerization activity;	------	------	------	------	ENOG411067N	S:Function unknown	KAF6997162.1	hypothetical protein CFC21_013418 [Triticum aestivum]	sp|A0A0P0WQ90|LF_ORYSJ;	Transcription factor LATE FLOWERING OS=Oryza sativa subsp. japonica OX=39947 GN=LF PE=1 SV=1;	PF00010.28	HLH	Helix-loop-helix DNA-binding domain
TraesCS1D02G370700	0.596667	0.023333	4.67648	-	GO:0005975;GO:0005618;GO:000465	BP:carbohydrate metabolic process;CC:cell wall;MF:polygalacturonase activity;	K01213;K01184	E3.2.1.67;E3.2.1.15	map00040	Pentose and glucuronate interconversions	COG5434	M:Cell wall/membrane/envelope biogenesis	KAF6997197.1	hypothetical protein CFC21_013448 [Triticum aestivum]	sp|Q94AJ5|PGLR5_ARATH;	Probable polygalacturonase At1g80170 OS=Arabidopsis thaliana OX=3702 GN=At1g80170 PE=1 SV=1;	PF00295.19;PF12708.9	Glyco_hydro_28;Pectate_lyase_3	Glycosyl hydrolases family 28;Pectate lyase superfamily protein
TraesCS1D02G372800	3.40583	1.515	1.16869	-	GO:0006468;GO:0005524;GO:000467	BP:protein phosphorylation;MF:ATP binding;MF:protein kinase activity;	K20716	MAPKKK17_18	map04016	MAPK signaling pathway - plant	ENOG410XQGS	T:Signal transduction mechanisms	KAF6997225.1	hypothetical protein CFC21_013470 [Triticum aestivum]	sp|O80888|M3K17_ARATH;	Mitogen-activated protein kinase kinase kinase 17 OS=Arabidopsis thaliana OX=3702 GN=MAPKKK17 PE=1 SV=1;	PF00069.27;PF07714.19;PF14531.8	Pkinase;PK_Tyr_Ser-Thr;Kinase-like	Protein kinase domain;Protein tyrosine and serine/threonine kinase;Kinase-like
TraesCS1D02G375900	2.33667	0.710833	1.71687	-	GO:0016021;GO:000551	CC:integral component of membrane;MF:protein binding;	------	------	------	------	COG4886	S:Function unknown	KAF6997253.1	hypothetical protein CFC21_013496 [Triticum aestivum]	------	------	PF13855.8;PF12799.9;PF00560.35	LRR_8;LRR_4;LRR_1	Leucine rich repeat;Leucine Rich repeats;Leucine Rich Repeat
TraesCS1D02G376300	0.36	0.075	2.26303	Alcohol dehydrogenase ADH3D [Source:UniProtKB/TrEMBL;Acc:A9U8F9]	GO:0046294;GO:0005737;GO:0005829;GO:0004024;GO:0004022;GO:0008270;GO:0051903;GO:0046872;GO:001649	BP:formaldehyde catabolic process;CC:cytoplasm;CC:cytosol;MF:alcohol dehydrogenase activity, zinc-dependent;MF:alcohol dehydrogenas;MF:zinc ion binding;MF:S;MF:metal ion binding;MF:oxidoreductase activity;	K18857	ADH1	map00620;map00010;map00592;map00071;map00350	Pyruvate metabolism;Glycolysis / Gluconeogenesis;alpha-Linolenic acid metabolism;Fatty acid degradation;Tyrosine metabolism	COG1062	C:Energy production and conversion	XP_020195689.1	alcohol dehydrogenase 3 [Aegilops tauschii subsp. strangulata]	sp|P10848|ADH3_HORVU;	Alcohol dehydrogenase 3 OS=Hordeum vulgare OX=4513 GN=ADH3 PE=3 SV=1;	PF00107.28;PF08240.14;PF16912.7	ADH_zinc_N;ADH_N;Glu_dehyd_C	Zinc-binding dehydrogenase;Alcohol dehydrogenase GroES-like domain;Glucose dehydrogenase C-terminus
TraesCS1D02G382900	93.5158	6.86667	3.76753	-	GO:0006355;GO:0006357;GO:0034605;GO:0005634;GO:0043565;GO:0003700;GO:0000978;GO:004280	BP:regulation of transcription, DNA-templated;BP:regulation of transcription from RNA polymerase II promoter;BP:cellular response to heat;CC:nucleus;MF:sequence-specific DNA binding;MF:transcription factor activity, sequence-specific DNA binding;MF:RNA polymerase II core promoter proximal region sequence-specific DNA binding;MF:identical protein binding;	K09419;K08967	HSFF;mtnD, mtnZ, ADI1	map00270	Cysteine and methionine metabolism	COG5169	K:Transcription	KAF6997318.1	hypothetical protein CFC21_013553 [Triticum aestivum]	sp|Q338B0|HFA2C_ORYSJ;	Heat stress transcription factor A-2c OS=Oryza sativa subsp. japonica OX=39947 GN=HSFA2C PE=1 SV=2;	PF00447.19	HSF_DNA-bind	HSF-type DNA-binding
TraesCS1D02G387100	12.8025	4.05583	1.65836	-	GO:000367	MF:DNA binding;	K09422	MYBP	------	------	COG5147	K:Transcription	KAF6997376.1	hypothetical protein CFC21_013600 [Triticum aestivum]	sp|Q9SJL7|RAX2_ARATH;	Transcription factor RAX2 OS=Arabidopsis thaliana OX=3702 GN=RAX2 PE=1 SV=1;	PF00249.33;PF13921.8	Myb_DNA-binding;Myb_DNA-bind_6	Myb-like DNA-binding domain;Myb-like DNA-binding domain
TraesCS1D02G389100	37.245	13.2875	1.48698	-	------	------	------	------	------	------	ENOG41106KF	S:Function unknown	KAF6997403.1	hypothetical protein CFC21_013622 [Triticum aestivum]	------	------	------	------	------
TraesCS1D02G389200	14.7242	4.00833	1.87711	-	------	------	------	------	------	------	ENOG41106KF	S:Function unknown	KAF6997404.1	hypothetical protein CFC21_013623 [Triticum aestivum]	------	------	------	------	------
TraesCS1D02G389300	4.015	1.94	1.04934	-	GO:0006659;GO:0016021;GO:0005789;GO:010624	BP:phosphatidylserine biosynthetic process;CC:integral component of membrane;CC:endoplasmic reticulum membrane;MF:L-serine-phosphatidylethanolamine phosphatidyltransferase activity;	K08730	PTDSS2	map00564	Glycerophospholipid metabolism	ENOG410XS7H	I:Lipid transport and metabolism	KAF6997405.1	hypothetical protein CFC21_013624 [Triticum aestivum]	sp|Q6I628|PSS2_ORYSJ;	CDP-diacylglycerol--serine O-phosphatidyltransferase 2 OS=Oryza sativa subsp. japonica OX=39947 GN=PSS2 PE=2 SV=2;	PF03034.17	PSS	Phosphatidyl serine synthase
TraesCS1D02G391700	0.201667	1.075	-2.41429	-	GO:001602	CC:integral component of membrane;	------	------	------	------	ENOG41112Z1	S:Function unknown	KAF6997425.1	hypothetical protein CFC21_013644 [Triticum aestivum]	------	------	PF03140.17	DUF247	Plant protein of unknown function
TraesCS1D02G391800	0.0175	0.183333	-3.38904	-	GO:001602	CC:integral component of membrane;	------	------	------	------	ENOG41112Z1	S:Function unknown	KAF6997431.1	hypothetical protein CFC21_013650 [Triticum aestivum]	------	------	PF03140.17	DUF247	Plant protein of unknown function
TraesCS1D02G392000	4.4775	0.56	2.99919	CASP-like protein [Source:UniProtKB/TrEMBL;Acc:A0A1D6DA60]	GO:0016021;GO:000588	CC:integral component of membrane;CC:plasma membrane;	------	------	------	------	ENOG41103Z0	S:Function unknown	KAE8794816.1	CASP-like protein 1U2 [Hordeum vulgare]	sp|Q2R0D1|CSPLK_ORYSJ;	CASP-like protein 1U2 OS=Oryza sativa subsp. japonica OX=39947 GN=Os11g0649700 PE=2 SV=1;	PF04535.14	DUF588	Domain of unknown function
TraesCS1D02G394500	3.91333	1.93417	1.01669	-	GO:0016021;GO:0016020;GO:001675	CC:integral component of membrane;CC:membrane;MF:transferase activity, transferring glycosyl groups;	------	------	------	------	ENOG410YEMA	S:Function unknown	XP_020182183.1	glycosyltransferase BC10 [Aegilops tauschii subsp. strangulata]	sp|Q65XS5|BC10_ORYSJ;	Glycosyltransferase BC10 OS=Oryza sativa subsp. japonica OX=39947 GN=BC10 PE=1 SV=1;	PF02485.23	Branch	Core-2/I-Branching enzyme
TraesCS1D02G396700	1.41167	0.544167	1.37528	-	------	------	------	------	------	------	ENOG411201X	S:Function unknown	KAF6991852.1	hypothetical protein CFC21_008900 [Triticum aestivum]	------	------	------	------	------
TraesCS1D02G397400	10.7075	2.86917	1.89992	Endoglucanase [Source:UniProtKB/TrEMBL;Acc:A0A1D5SPZ2]	GO:0005975;GO:0030245;GO:0016021;GO:0005576;GO:0008810;GO:0030246;GO:000455	BP:carbohydrate metabolic process;BP:cellulose catabolic process;CC:integral component of membrane;CC:extracellular region;MF:cellulase activity;MF:carbohydrate binding;MF:hydrolase activity, hydrolyzing O-glycosyl compounds;	K01179	E3.2.1.4	map00500	Starch and sucrose metabolism	ENOG410XPC9	G:Carbohydrate transport and metabolism	XP_020157984.1	endoglucanase 15 [Aegilops tauschii subsp. strangulata]	sp|Q6L4I2|GUN15_ORYSJ;	Endoglucanase 15 OS=Oryza sativa subsp. japonica OX=39947 GN=Os05g0212300 PE=2 SV=1;	PF00759.21;PF09478.12	Glyco_hydro_9;CBM49	Glycosyl hydrolase family 9;Carbohydrate binding domain CBM49
TraesCS1D02G397500	1.0425	0.433333	1.2665	-	GO:0070897;GO:0006352;GO:001702	BP:DNA-templated transcriptional preinitiation complex assembly;BP:DNA-templated transcription, initiation;MF:TBP-class protein binding;	K15196	BRF1, GTF3B	------	------	COG1405	K:Transcription	XP_020157994.2	transcription factor IIIB 60 kDa subunit [Aegilops tauschii subsp. strangulata]	sp|Q8CFK2|TF3B_MOUSE;	Transcription factor IIIB 90 kDa subunit OS=Mus musculus OX=10090 GN=Brf1 PE=1 SV=1;	PF00382.21;PF07741.15	TFIIB;BRF1	Transcription factor TFIIB repeat;Brf1-like TBP-binding domain
TraesCS1D02G397900	1.185	2.96083	-1.32112	-	GO:000370	MF:transcription factor activity, sequence-specific DNA binding;	------	------	------	------	ENOG410Z28R	S:Function unknown	KAF6997506.1	hypothetical protein CFC21_013721 [Triticum aestivum]	------	------	------	------	------
TraesCS1D02G398700	13.3317	5.41667	1.29938	-	GO:001602	CC:integral component of membrane;	------	------	------	------	ENOG410XUTP;ENOG410YK39	S:Function unknown;	XP_020178390.1	cell number regulator 2 [Aegilops tauschii subsp. strangulata]	sp|B6TYV8|CNR2_MAIZE;	Cell number regulator 2 OS=Zea mays OX=4577 GN=CNR2 PE=2 SV=1;	PF04749.19	PLAC8	PLAC8 family
TraesCS1D02G399400	0.5175	0.101667	2.34771	-	GO:0006468;GO:0005524;GO:000467	BP:protein phosphorylation;MF:ATP binding;MF:protein kinase activity;	K20604	MKK9	map04016	MAPK signaling pathway - plant	ENOG410XQ5A	T:Signal transduction mechanisms	XP_020178389.1	mitogen-activated protein kinase kinase 9-like [Aegilops tauschii subsp. strangulata]	sp|Q9FX43|M2K9_ARATH;	Mitogen-activated protein kinase kinase 9 OS=Arabidopsis thaliana OX=3702 GN=MKK9 PE=1 SV=1;	PF00069.27;PF07714.19;PF14531.8	Pkinase;PK_Tyr_Ser-Thr;Kinase-like	Protein kinase domain;Protein tyrosine and serine/threonine kinase;Kinase-like
TraesCS1D02G401800	0.390833	2.53333	-2.69641	Purple acid phosphatase [Source:UniProtKB/TrEMBL;Acc:A0A1D5T005]	GO:0016787;GO:0046872;GO:000399	MF:hydrolase activity;MF:metal ion binding;MF:acid phosphatase activity;	K22390	ACP7	------	------	COG1409	S:Function unknown	KAF6997550.1	hypothetical protein CFC21_013759 [Triticum aestivum]	sp|Q5MAU8|PPA27_ARATH;	Probable inactive purple acid phosphatase 27 OS=Arabidopsis thaliana OX=3702 GN=PAP27 PE=2 SV=1;	PF17808.3;PF00149.30;PF14008.8;PF16656.7	fn3_PAP;Metallophos;Metallophos_C;Pur_ac_phosph_N	Fn3-like domain from Purple Acid Phosphatase;Calcineurin-like phosphoesterase;Iron/zinc purple acid phosphatase-like protein C;Purple acid Phosphatase, N-terminal domain
TraesCS1D02G402300	20.3742	9.75333	1.06277	-	GO:001602	CC:integral component of membrane;	------	------	------	------	ENOG41105Q8	S:Function unknown	XP_020196769.1	uncharacterized protein LOC109782557 [Aegilops tauschii subsp. strangulata]	------	------	------	------	------
TraesCS1D02G402400	3.31083	0.305833	3.43638	-	GO:0016021;GO:000550	CC:integral component of membrane;MF:calcium ion binding;	K02183	CALM	map04626;map04070;map04016	Plant-pathogen interaction;Phosphatidylinositol signaling system;MAPK signaling pathway - plant	COG5126;COG5126;COG5126	D:Cell cycle control, cell division, chromosome partitioning;T:Signal transduction mechanisms;Z:Cytoskeleton	KAF6997556.1	hypothetical protein CFC21_013765 [Triticum aestivum]	sp|Q93Z27|CML46_ARATH;	Probable calcium-binding protein CML46 OS=Arabidopsis thaliana OX=3702 GN=CML46 PE=1 SV=1;	PF00036.34;PF13405.8;PF13499.8;PF00404.20;PF13202.8	EF-hand_1;EF-hand_6;EF-hand_7;Dockerin_1;EF-hand_5	EF hand;EF-hand domain;EF-hand domain pair;Dockerin type I domain;EF hand
TraesCS1D02G403500	61.2808	6.63917	3.20636	-	GO:0006457;GO:0005783;GO:005108	BP:protein folding;CC:endoplasmic reticulum;MF:unfolded protein binding;	K09510	DNAJB4	------	------	COG0484	O:Posttranslational modification, protein turnover, chaperones	KAF6997561.1	hypothetical protein CFC21_013770 [Triticum aestivum]	sp|Q5R8J8|DNJB4_PONAB;	DnaJ homolog subfamily B member 4 OS=Pongo abelii OX=9601 GN=DNAJB4 PE=2 SV=1;	PF01556.20;PF00226.33	DnaJ_C;DnaJ	DnaJ C terminal domain;DnaJ domain
TraesCS1D02G404300	26.3075	81.18	-1.62565	Xyloglucan endotransglucosylase/hydrolase [Source:UniProtKB/TrEMBL;Acc:Q56TP4]	GO:0042546;GO:0005975;GO:0006073;GO:0009987;GO:0071555;GO:0008152;GO:0010411;GO:0005618;GO:0048046;GO:0005576;GO:0016787;GO:0016798;GO:0016762;GO:0016740;GO:000455	BP:cell wall biogenesis;BP:carbohydrate metabolic process;BP:cellular glucan metabolic process;BP:cellular process;BP:cell wall organization;BP:metabolic process;BP:xyloglucan metabolic process;CC:cell wall;CC:apoplast;CC:extracellular region;MF:hydrolase activity;MF:hydrolase activity, acting on glycosyl bonds;MF:xylogluca;MF:transferase activity;MF:hydrolase activity, hydrolyzing O-glycosyl com…	K08235	E2.4.1.207	------	------	COG2273	G:Carbohydrate transport and metabolism	XP_020158283.1	xyloglucan endotransglycosylase/hydrolase protein 8 [Aegilops tauschii subsp. strangulata]	sp|Q76BW5|XTH8_ORYSJ;	Xyloglucan endotransglycosylase/hydrolase protein 8 OS=Oryza sativa subsp. japonica OX=39947 GN=XTH8 PE=1 SV=1;	PF00722.23;PF06955.14	Glyco_hydro_16;XET_C	Glycosyl hydrolases family 16;Xyloglucan endo-transglycosylase
TraesCS1D02G404700	36.0217	90.68	-1.33192	-	GO:0009834;GO:000588	BP:plant-type secondary cell wall biogenesis;CC:plasma membrane;	------	------	------	------	ENOG41108S6	S:Function unknown	XP_020158284.1	fasciclin-like arabinogalactan protein 12 [Aegilops tauschii subsp. strangulata]	sp|Q8LEJ6|FLA11_ARATH;	Fasciclin-like arabinogalactan protein 11 OS=Arabidopsis thaliana OX=3702 GN=FLA11 PE=2 SV=2;	PF02469.24;PF11067.10	Fasciclin;DUF2868	Fasciclin domain;Protein of unknown function
TraesCS1D02G407600	0.865	1.9675	-1.18559	-	GO:0055114;GO:0016021;GO:0020037;GO:001649	BP:oxidation-reduction process;CC:integral component of membrane;MF:heme binding;MF:oxidoreductase activity;	------	------	------	------	ENOG4111TB6	S:Function unknown	XP_020161195.1	cytochrome b561 domain-containing protein At2g30890 [Aegilops tauschii subsp. strangulata]	sp|O80854|B561L_ARATH;	Cytochrome b561 domain-containing protein At2g30890 OS=Arabidopsis thaliana OX=3702 GN=At2g30890 PE=2 SV=1;	PF03188.18	Cytochrom_B561	Eukaryotic cytochrome b561
TraesCS1D02G408300	0.575	0.1775	1.69574	-	GO:0009536;GO:0016491;GO:0003824;GO:0050661;GO:005128	CC:plastid;MF:oxidoreductase activity;MF:catalytic activity;MF:NADP binding;MF:NAD binding;	------	------	------	------	ENOG410XQET	S:Function unknown	KAF6997597.1	hypothetical protein CFC21_013804 [Triticum aestivum]	sp|P51373|YCF23_PORPU;	Uncharacterized protein ycf23 OS=Porphyra purpurea OX=2787 GN=ycf23 PE=3 SV=1;	PF04481.14	DUF561	Protein of unknown function
TraesCS1D02G409200	2.135	0.364167	2.55156	-	GO:000551	MF:protein binding;	------	------	------	------	ENOG41106GW	S:Function unknown	XP_020198308.1	uncharacterized protein LOC109784122 [Aegilops tauschii subsp. strangulata]	------	------	PF12937.9	F-box-like	F-box-like
TraesCS1D02G413600	7.225	18.4192	-1.35014	-	GO:0008643;GO:0055085;GO:0016021;GO:0016020;GO:0015293;GO:002285	BP:carbohydrate transport;BP:transmembrane transport;CC:integral component of membrane;CC:membrane;MF:symporter activity;MF:transmembrane transporter activity;	K03444	ERD6, ESL1	------	------	ENOG410XNQK	G:Carbohydrate transport and metabolism	KAF6997660.1	hypothetical protein CFC21_013864 [Triticum aestivum]	sp|Q93YP9|ERDL4_ARATH;	Sugar transporter ERD6-like 4 OS=Arabidopsis thaliana OX=3702 GN=At1g19450 PE=2 SV=1;	PF00083.26;PF07690.18	Sugar_tr;MFS_1	Sugar;Major Facilitator Superfamily
TraesCS1D02G413700	4.52167	10.8675	-1.26509	-	GO:0055085;GO:0016021;GO:0016020;GO:0022857;GO:001529	BP:transmembrane transport;CC:integral component of membrane;CC:membrane;MF:transmembrane transporter activity;MF:symporter activity;	K03444	ERD6, ESL1	------	------	ENOG410XNQK	G:Carbohydrate transport and metabolism	KAF6997661.1	hypothetical protein CFC21_013865 [Triticum aestivum]	sp|Q93YP9|ERDL4_ARATH;	Sugar transporter ERD6-like 4 OS=Arabidopsis thaliana OX=3702 GN=At1g19450 PE=2 SV=1;	PF00083.26;PF07690.18	Sugar_tr;MFS_1	Sugar;Major Facilitator Superfamily
TraesCS1D02G418000	4.19667	1.8625	1.172	-	GO:0006355;GO:0050896;GO:0005634;GO:0043565;GO:0003700;GO:0000976;GO:000367	BP:regulation of transcription, DNA-templated;BP:response to stimulus;CC:nucleus;MF:sequence-specific DNA binding;MF:transcription factor activity, sequence-specific DNA binding;MF:transcription regulatory region sequence-specific DNA binding;MF:DNA binding;	------	------	------	------	ENOG41104H2	S:Function unknown	KAF6997720.1	hypothetical protein CFC21_013913 [Triticum aestivum]	sp|Q0DFT7|WRK19_ORYSJ;	Transcription factor WRKY19 OS=Oryza sativa subsp. japonica OX=39947 GN=WRKY19 PE=2 SV=1;	PF03106.17	WRKY	WRKY DNA -binding domain
TraesCS1D02G418400	7.20333	1.97917	1.86377	-	GO:0006355;GO:0050896;GO:0005634;GO:0043565;GO:0003700;GO:000367	BP:regulation of transcription, DNA-templated;BP:response to stimulus;CC:nucleus;MF:sequence-specific DNA binding;MF:transcription factor activity, sequence-specific DNA binding;MF:DNA binding;	------	------	------	------	ENOG41104H2	S:Function unknown	XP_020196714.1	probable WRKY transcription factor 72 [Aegilops tauschii subsp. strangulata]	sp|Q0DFT7|WRK19_ORYSJ;	Transcription factor WRKY19 OS=Oryza sativa subsp. japonica OX=39947 GN=WRKY19 PE=2 SV=1;	PF03106.17	WRKY	WRKY DNA -binding domain
TraesCS1D02G418500	0.975833	0.280833	1.79692	-	GO:0006355;GO:0005634;GO:0003700;GO:0000976;GO:004356	BP:regulation of transcription, DNA-templated;CC:nucleus;MF:transcription factor activity, sequence-specific DNA binding;MF:transcription regulatory region sequence-specific DNA binding;MF:sequence-specific DNA binding;	------	------	------	------	ENOG41104H2	S:Function unknown	XP_020196720.1	probable WRKY transcription factor 53 [Aegilops tauschii subsp. strangulata]	sp|Q0DFT7|WRK19_ORYSJ;	Transcription factor WRKY19 OS=Oryza sativa subsp. japonica OX=39947 GN=WRKY19 PE=2 SV=1;	PF03106.17	WRKY	WRKY DNA -binding domain
TraesCS1D02G418700	4.61917	1.99333	1.21245	-	GO:0016021;GO:0005634;GO:0003700;GO:0043565;GO:000097	CC:integral component of membrane;CC:nucleus;MF:transcription factor activity, sequence-specific DNA binding;MF:sequence-specific DNA binding;MF:transcription regulatory region sequence-specific DNA binding;	------	------	------	------	ENOG4111TVW;ENOG41104H2;ENOG410XRNW	S:Function unknown;U:Intracellular trafficking, secretion, and vesicular transport	KAF6997727.1	hypothetical protein CFC21_013919 [Triticum aestivum]	sp|Q0DFT7|WRK19_ORYSJ;	Transcription factor WRKY19 OS=Oryza sativa subsp. japonica OX=39947 GN=WRKY19 PE=2 SV=1;	PF12159.10	DUF3593	Protein of unknown function
TraesCS1D02G420200	1.28667	4.7775	-1.89262	Sulfotransferase [Source:UniProtKB/TrEMBL;Acc:A0A1D5SRC7]	GO:000814	MF:sulfotransferase activity;	K22312	ST2A, SOT15	------	------	ENOG4111H56	S:Function unknown	XP_020174224.1	cytosolic sulfotransferase 5 [Aegilops tauschii subsp. strangulata]	sp|Q8RV79|SOT11_ARATH;	Cytosolic sulfotransferase 11 OS=Arabidopsis thaliana OX=3702 GN=SOT11 PE=2 SV=1;	PF00685.29;PF13469.8	Sulfotransfer_1;Sulfotransfer_3	Sulfotransferase domain;Sulfotransferase family
TraesCS1D02G421600	0.0075	0.27	-5.16993	-	------	------	------	------	------	------	ENOG41116XK	S:Function unknown	XP_020179189.1	uncharacterized protein LOC109764819 [Aegilops tauschii subsp. strangulata]	------	------	PF05553.13	DUF761	Cotton fibre expressed protein
TraesCS1D02G421900	2.33583	0.993333	1.23359	-	GO:0046872;GO:0051213;GO:001649	MF:metal ion binding;MF:dioxygenase activity;MF:oxidoreductase activity;	------	------	------	------	COG3491	S:Function unknown	KAF6997764.1	hypothetical protein CFC21_013949 [Triticum aestivum]	sp|Q9ZTA3|AOP1C_ARATH;	Probable 2-oxoglutarate-dependent dioxygenase AOP1 OS=Arabidopsis thaliana OX=3702 GN=AOP1 PE=2 SV=1;	PF03171.22;PF14226.8	2OG-FeII_Oxy;DIOX_N	2OG-F;non-haem dioxygenase in morphine synthesis N-terminal
TraesCS1D02G422000	12.8558	4.64167	1.46971	-	------	------	------	------	------	------	ENOG410ZDQD;ENOG41107QD	S:Function unknown;	KAF6997765.1	hypothetical protein CFC21_013950 [Triticum aestivum]	------	------	------	------	------
TraesCS1D02G422800	1.01333	2.80083	-1.46675	Mitogen-activated protein kinase [Source:UniProtKB/TrEMBL;Acc:A0A1D5ST84]	GO:0006468;GO:0016310;GO:0000165;GO:0035556;GO:0005737;GO:0005634;GO:0005622;GO:0016301;GO:0016740;GO:0000166;GO:0004674;GO:0004707;GO:0106311;GO:0004672;GO:0005524;GO:010631	BP:protein phosphorylation;BP:phosphorylation;BP:MAPK cascade;BP:intracellular signal transduction;CC:cytoplasm;CC:nucleus;CC:intracellular;MF:kinase activity;MF:transferase activity;MF:nucleotide binding;MF:protein serine/threonine kinase activity;MF:MAP kinase activity;MF:old GO;MF:protein kinase activity;MF:ATP binding;MF:old GO;	------	------	------	------	ENOG410XNY0	T:Signal transduction mechanisms	XP_020174544.1	mitogen-activated protein kinase 17 isoform X1 [Aegilops tauschii subsp. strangulata]	sp|Q6L5F7|MPK17_ORYSJ;	Mitogen-activated protein kinase 17 OS=Oryza sativa subsp. japonica OX=39947 GN=MPK17 PE=2 SV=2;	PF00069.27;PF07714.19;PF06293.16	Pkinase;PK_Tyr_Ser-Thr;Kdo	Protein kinase domain;Protein tyrosine and serine/threonine kinase;Lipopolysaccharide kinase
TraesCS1D02G424500	10.0633	0	#DIV/0!	-	GO:0009061;GO:000697	BP:anaerobic respiration;BP:response to oxidative stress;	------	------	------	------	ENOG410YT9R	S:Function unknown	KAF6997795.1	hypothetical protein CFC21_013975 [Triticum aestivum]	------	------	------	------	------
TraesCS1D02G429800	2.025	0.368333	2.45884	-	GO:0006355;GO:0005634;GO:0003700;GO:004356	BP:regulation of transcription, DNA-templated;CC:nucleus;MF:transcription factor activity, sequence-specific DNA binding;MF:sequence-specific DNA binding;	------	------	------	------	ENOG410YJVP;ENOG410YIC2	K:Transcription;	KAF6997852.1	hypothetical protein CFC21_014024 [Triticum aestivum]	sp|O22900|WRK23_ARATH;	WRKY transcription factor 23 OS=Arabidopsis thaliana OX=3702 GN=WRKY23 PE=2 SV=1;	PF03106.17	WRKY	WRKY DNA -binding domain
TraesCS1D02G432000	4.92083	1.765	1.47923	-	GO:0016020;GO:000588	CC:membrane;CC:plasma membrane;	------	------	------	------	ENOG41107TS;ENOG41107Z3	S:Function unknown;	KAF6997879.1	hypothetical protein CFC21_014048 [Triticum aestivum]	------	------	------	------	------
TraesCS1D02G432800	1.75167	0.241667	2.85764	-	GO:0055085;GO:001602	BP:transmembrane transport;CC:integral component of membrane;	------	------	------	------	ENOG4111I0D	P:Inorganic ion transport and metabolism	XP_020151234.2	S-type anion channel SLAH2 [Aegilops tauschii subsp. strangulata]	sp|Q9ASQ7|SLAH2_ARATH;	S-type anion channel SLAH2 OS=Arabidopsis thaliana OX=3702 GN=SLAH2 PE=2 SV=1;	PF03595.19	SLAC1	Voltage-dependent anion channel
TraesCS1D02G432900	3.08667	0.176667	4.12695	-	GO:0055085;GO:001602	BP:transmembrane transport;CC:integral component of membrane;	------	------	------	------	ENOG4111I0D	P:Inorganic ion transport and metabolism	XP_020151235.1	S-type anion channel SLAH2 [Aegilops tauschii subsp. strangulata]	sp|Q9ASQ7|SLAH2_ARATH;	S-type anion channel SLAH2 OS=Arabidopsis thaliana OX=3702 GN=SLAH2 PE=2 SV=1;	PF03595.19	SLAC1	Voltage-dependent anion channel
TraesCS1D02G433100	1.12417	0.135833	3.04895	-	GO:0055085;GO:001602	BP:transmembrane transport;CC:integral component of membrane;	------	------	------	------	ENOG4111I0D	P:Inorganic ion transport and metabolism	KAF6997889.1	hypothetical protein CFC21_014058 [Triticum aestivum]	sp|Q9ASQ7|SLAH2_ARATH;	S-type anion channel SLAH2 OS=Arabidopsis thaliana OX=3702 GN=SLAH2 PE=2 SV=1;	PF03595.19	SLAC1	Voltage-dependent anion channel
TraesCS1D02G433200	2.69667	0.321667	3.06754	-	GO:0055085;GO:001602	BP:transmembrane transport;CC:integral component of membrane;	------	------	------	------	ENOG4111I0D	P:Inorganic ion transport and metabolism	KAF6997890.1	hypothetical protein CFC21_014059 [Triticum aestivum]	sp|Q9ASQ7|SLAH2_ARATH;	S-type anion channel SLAH2 OS=Arabidopsis thaliana OX=3702 GN=SLAH2 PE=2 SV=1;	PF03595.19	SLAC1	Voltage-dependent anion channel
TraesCS1D02G433300	0.535	1.30083	-1.28182	-	------	------	------	------	------	------	ENOG410Y0MH;ENOG410Y0R7	S:Function unknown;	KAF6997891.1	hypothetical protein CFC21_014060 [Triticum aestivum]	sp|Q6I588|ABIL4_ORYSJ;	Probable protein ABIL4 OS=Oryza sativa subsp. japonica OX=39947 GN=Os05g0585400 PE=2 SV=1;	------	------	------
TraesCS1D02G435800	6.31167	15.565	-1.30221	-	GO:0055085;GO:0016021;GO:0016020;GO:0022857;GO:001529	BP:transmembrane transport;CC:integral component of membrane;CC:membrane;MF:transmembrane transporter activity;MF:symporter activity;	------	------	------	------	ENOG410XNQK	G:Carbohydrate transport and metabolism	KAF6997918.1	hypothetical protein CFC21_014084 [Triticum aestivum]	sp|Q9XIH7|PLT1_ARATH;	Putative polyol transporter 1 OS=Arabidopsis thaliana OX=3702 GN=PLT1 PE=3 SV=1;	PF00083.26;PF07690.18	Sugar_tr;MFS_1	Sugar;Major Facilitator Superfamily
TraesCS1D02G437600	0.743333	0.1725	2.10741	-	GO:001678	MF:hydrolase activity;	K06130	LYPLA2	map00564	Glycerophospholipid metabolism	COG0400	S:Function unknown	XP_020157363.1	acyl-protein thioesterase 1 homolog 1 [Aegilops tauschii subsp. strangulata]	sp|P0CL95|APTH1_CRYNB;	Acyl-protein thioesterase 1 OS=Cryptococcus neoformans var. neoformans serotype D;	PF02230.18;PF12146.10;PF03959.15;PF10503.11;PF12697.9;PF03583.16;PF01738.20	Abhydrolase_2;Hydrolase_4;FSH1;Esterase_PHB;Abhydrolase_6;LIP;DLH	Phospholipase/Carboxylesterase;Serine aminopeptidase, S33;Serine hydrolase;Esterase PHB depolymerase;Alpha/beta hydrolase family;Secretory lipase;Dienelactone hydrolase family
TraesCS1D02G439300	8.10417	2.21	1.87462	-	GO:0016887;GO:000552	MF:ATPase activity;MF:ATP binding;	K08900	BCS1	------	------	COG0465	O:Posttranslational modification, protein turnover, chaperones	KAF6997953.1	hypothetical protein CFC21_014119 [Triticum aestivum]	sp|Q8VZG2|HSR4_ARATH;	Protein HYPER-SENSITIVITY-RELATED 4 OS=Arabidopsis thaliana OX=3702 GN=HSR4 PE=2 SV=1;	PF14363.8;PF00004.31;PF05496.14;PF05673.15;PF13191.8;PF13401.8;PF00910.24	AAA_assoc;AAA;RuvB_N;DUF815;AAA_16;AAA_22;RNA_helicase	Domain associated at C-terminal with AAA;ATPase family associated with various cellular activities;Holliday junction DNA helicase RuvB P-loop domain;Protein of unknown function;AAA ATPase domain;AAA domain;RNA helicase
TraesCS1D02G439400	1.3575	0.103333	3.71558	-	GO:0016887;GO:000552	MF:ATPase activity;MF:ATP binding;	K08900	BCS1	------	------	COG0465	O:Posttranslational modification, protein turnover, chaperones	KAF6997954.1	hypothetical protein CFC21_014120 [Triticum aestivum]	sp|Q147F9|AATPC_ARATH;	AAA-ATPase At3g50940 OS=Arabidopsis thaliana OX=3702 GN=At3g50940 PE=2 SV=1;	PF14363.8;PF00004.31;PF05673.15;PF05496.14;PF13191.8;PF00910.24	AAA_assoc;AAA;DUF815;RuvB_N;AAA_16;RNA_helicase	Domain associated at C-terminal with AAA;ATPase family associated with various cellular activities;Protein of unknown function;Holliday junction DNA helicase RuvB P-loop domain;AAA ATPase domain;RNA helicase
TraesCS1D02G439500	12.8075	4.97417	1.36446	-	GO:0016887;GO:000552	MF:ATPase activity;MF:ATP binding;	K08900	BCS1	------	------	COG0465	O:Posttranslational modification, protein turnover, chaperones	XP_040254368.1	AAA-ATPase At3g50940 [Aegilops tauschii subsp. strangulata]	sp|Q8VZG2|HSR4_ARATH;	Protein HYPER-SENSITIVITY-RELATED 4 OS=Arabidopsis thaliana OX=3702 GN=HSR4 PE=2 SV=1;	PF14363.8;PF00004.31;PF05496.14;PF05673.15;PF13191.8;PF00910.24	AAA_assoc;AAA;RuvB_N;DUF815;AAA_16;RNA_helicase	Domain associated at C-terminal with AAA;ATPase family associated with various cellular activities;Holliday junction DNA helicase RuvB P-loop domain;Protein of unknown function;AAA ATPase domain;RNA helicase
TraesCS1D02G442600	0.075	0.680833	-3.18234	-	GO:001678	MF:hydrolase activity, acting on ester bonds;	------	------	------	------	------	------	KAF6997997.1	hypothetical protein CFC21_014156 [Triticum aestivum]	sp|Q9FIA1|GDL87_ARATH;	GDSL esterase/lipase At5g55050 OS=Arabidopsis thaliana OX=3702 GN=At5g55050 PE=2 SV=1;	PF00657.24	Lipase_GDSL	GDSL-like Lipase/Acylhydrolase
TraesCS1D02G449300	0.378333	0.033333	3.50463	-	GO:0016021;GO:000551	CC:integral component of membrane;MF:protein binding;	------	------	------	------	COG4886	S:Function unknown	KAF6998070.1	hypothetical protein CFC21_014227 [Triticum aestivum]	sp|Q6JN47|EIX1_SOLLC;	Receptor-like protein EIX1 OS=Solanum lycopersicum OX=4081 GN=EIX1 PE=2 SV=2;	PF13855.8;PF12799.9;PF08263.14	LRR_8;LRR_4;LRRNT_2	Leucine rich repeat;Leucine Rich repeats;Leucine rich repeat N-terminal domain
TraesCS1D02G452300	16.3108	47.2275	-1.5338	-	GO:0006228;GO:0006241;GO:0006165;GO:0006183;GO:0004550;GO:000552	BP:UTP biosynthetic process;BP:CTP biosynthetic process;BP:nucleoside diphosphate phosphorylation;BP:GTP biosynthetic process;MF:nucleoside diphosphate kinase activity;MF:ATP binding;	K00940	ndk, NME	map00240;map04016;map00230;map01240	Pyrimidine metabolism;MAPK signaling pathway - plant;Purine metabolism;Biosynthesis of cofactors	COG0105	F:Nucleotide transport and metabolism	XP_020169160.1	uncharacterized protein LOC109754656 [Aegilops tauschii subsp. strangulata]	sp|O49203|NDK3_ARATH;	Nucleoside diphosphate kinase III, chloroplastic/mitochondrial OS=Arabidopsis thaliana OX=3702 GN=NDPK3 PE=1 SV=1;	PF00334.21	NDK	Nucleoside diphosphate kinase
TraesCS2A02G005100	0.496667	0.071667	2.7929	-	GO:0016021;GO:0004497;GO:0016705;GO:0005506;GO:002003	CC:integral component of membrane;MF:monooxygenase activity;MF:oxidoreductase activity, acting on paired donors, with incorporation or reduction of molecular oxygen;MF:iron ion binding;MF:heme binding;	------	------	------	------	COG2124	Q:Secondary metabolites biosynthesis, transport and catabolism	KAF6998203.1	hypothetical protein CFC21_014341 [Triticum aestivum]	sp|A0A0N9HT29|C71BE_SINHE;	Desmethyl-deoxy-podophyllotoxin synthase OS=Sinopodophyllum hexandrum OX=93608 GN=CYP71BE54 PE=1 SV=1;	PF00067.24	p450	Cytochrome P450
TraesCS2A02G009500	0.295	1.22583	-2.05498	Glycosyltransferase [Source:UniProtKB/TrEMBL;Acc:A0A1D5TJP9]	GO:0016758;GO:0016740;GO:0008194;GO:001675	MF:transferase activity, transferring hexosyl groups;MF:transferase activity;MF:UDP-glycosyltransferase activity;MF:transferase activity, transferring glycosyl groups;	------	------	------	------	COG1819	S:Function unknown	KAF6998253.1	hypothetical protein CFC21_014387 [Triticum aestivum]	sp|D3UAG6|U88F5_MALDO;	UDP-glycosyltransferase 88F5 OS=Malus domestica OX=3750 GN=UGT88F5 PE=2 SV=1;	PF00201.20	UDPGT	UDP-glucoronosyl and UDP-glucosyl transferase
TraesCS2A02G010300	5.18083	0.610833	3.08433	-	GO:0006468;GO:0016021;GO:0005524;GO:0005515;GO:000467	BP:protein phosphorylation;CC:integral component of membrane;MF:ATP binding;MF:protein binding;MF:protein kinase activity;	------	------	------	------	COG4886;ENOG410Y9R3	S:Function unknown;	KAF6998264.1	hypothetical protein CFC21_014398 [Triticum aestivum]	sp|Q8VZG8|MIK2_ARATH;	MDIS1-interacting receptor like kinase 2 OS=Arabidopsis thaliana OX=3702 GN=MIK2 PE=1 SV=3;	PF13855.8;PF00069.27;PF07714.19;PF12799.9;PF00560.35;PF08263.14;PF12260.10	LRR_8;Pkinase;PK_Tyr_Ser-Thr;LRR_4;LRR_1;LRRNT_2;PIP49_C	Leucine rich repeat;Protein kinase domain;Protein tyrosine and serine/threonine kinase;Leucine Rich repeats;Leucine Rich Repeat;Leucine rich repeat N-terminal domain;Protein-kinase domain of FAM69
TraesCS2A02G011000	3.61167	0.775833	2.21885	-	GO:0006355;GO:0005634;GO:0003700;GO:004356	BP:regulation of transcription, DNA-templated;CC:nucleus;MF:transcription factor activity, sequence-specific DNA binding;MF:sequence-specific DNA binding;	------	------	------	------	ENOG410YM5M	K:Transcription	XP_037480944.1	probable WRKY transcription factor 75 [Triticum dicoccoides]	sp|Q9FYA2|WRK75_ARATH;	Probable WRKY transcription factor 75 OS=Arabidopsis thaliana OX=3702 GN=WRKY75 PE=1 SV=1;	PF03106.17	WRKY	WRKY DNA -binding domain
TraesCS2A02G013200	7.34417	1.6975	2.11319	-	GO:0016021;GO:0004497;GO:0016705;GO:0005506;GO:002003	CC:integral component of membrane;MF:monooxygenase activity;MF:oxidoreductase activity, acting on paired donors, with incorporation or reduction of molecular oxygen;MF:iron ion binding;MF:heme binding;	K09590	CYP85A1, BR6OX1	map00905	Brassinosteroid biosynthesis	COG2124	Q:Secondary metabolites biosynthesis, transport and catabolism	KAF6998303.1	hypothetical protein CFC21_014429 [Triticum aestivum]	sp|Q8GSQ1|C85A1_ORYSJ;	Cytochrome P450 85A1 OS=Oryza sativa subsp. japonica OX=39947 GN=CYP85A1 PE=1 SV=1;	PF00067.24	p450	Cytochrome P450
TraesCS2A02G013500	3.2875	0.6025	2.44796	-	GO:0016021;GO:0004497;GO:0016705;GO:0005506;GO:002003	CC:integral component of membrane;MF:monooxygenase activity;MF:oxidoreductase activity, acting on paired donors, with incorporation or reduction of molecular oxygen;MF:iron ion binding;MF:heme binding;	K09590	CYP85A1, BR6OX1	map00905	Brassinosteroid biosynthesis	COG2124	Q:Secondary metabolites biosynthesis, transport and catabolism	KAF6998307.1	hypothetical protein CFC21_014432 [Triticum aestivum]	sp|Q8GSQ1|C85A1_ORYSJ;	Cytochrome P450 85A1 OS=Oryza sativa subsp. japonica OX=39947 GN=CYP85A1 PE=1 SV=1;	PF00067.24	p450	Cytochrome P450
TraesCS2A02G016300	1.475	0.404167	1.86769	-	------	------	------	------	------	------	ENOG410YWC0	S:Function unknown	KAF6998343.1	hypothetical protein CFC21_014467 [Triticum aestivum]	------	------	PF07795.13	DUF1635	Protein of unknown function
TraesCS2A02G016700	0.716667	0.264167	1.43985	-	GO:000552	MF:ATP binding;	------	------	------	------	COG4886	S:Function unknown	KAF6998349.1	hypothetical protein CFC21_014471 [Triticum aestivum]	sp|Q7XBQ9|RGA2_SOLBU;	Disease resistance protein RGA2 OS=Solanum bulbocastanum OX=147425 GN=RGA2 PE=1 SV=1;	PF18052.3	Rx_N	Rx N-terminal domain
TraesCS2A02G018100	1.68	0.22	2.93289	-	------	------	------	------	------	------	COG4886	S:Function unknown	KAF6998365.1	hypothetical protein CFC21_014487 [Triticum aestivum]	sp|Q9LRR4|R13L1_ARATH;	Putative disease resistance RPP13-like protein 1 OS=Arabidopsis thaliana OX=3702 GN=RPPL1 PE=3 SV=1;	PF18052.3	Rx_N	Rx N-terminal domain
TraesCS2A02G018200	1.46833	0.2	2.87611	-	GO:000552	MF:ATP binding;	------	------	------	------	COG4886	S:Function unknown	KAF6998366.1	hypothetical protein CFC21_014488 [Triticum aestivum]	sp|Q9LRR4|R13L1_ARATH;	Putative disease resistance RPP13-like protein 1 OS=Arabidopsis thaliana OX=3702 GN=RPPL1 PE=3 SV=1;	PF18052.3	Rx_N	Rx N-terminal domain
TraesCS2A02G023200	0.050833	0.178333	-1.81074	-	GO:0006468;GO:0016021;GO:0004713;GO:0005524;GO:000467	BP:protein phosphorylation;CC:integral component of membrane;MF:protein tyrosine kinase activity;MF:ATP binding;MF:protein kinase activity;	------	------	------	------	COG0515	T:Signal transduction mechanisms	KAF6998420.1	hypothetical protein CFC21_014542 [Triticum aestivum]	sp|Q8S8N4|Y2685_ARATH;	Probably inactive receptor-like protein kinase At2g46850 OS=Arabidopsis thaliana OX=3702 GN=At2g46850 PE=3 SV=1;	PF07714.19;PF00069.27	PK_Tyr_Ser-Thr;Pkinase	Protein tyrosine and serine/threonine kinase;Protein kinase domain
TraesCS2A02G025100	2.14833	10.8333	-2.33419	-	GO:0016021;GO:0004497;GO:0016705;GO:0005506;GO:002003	CC:integral component of membrane;MF:monooxygenase activity;MF:oxidoreductase activity, acting on paired donors, with incorporation or reduction of molecular oxygen;MF:iron ion binding;MF:heme binding;	K24184	CYP89A	------	------	COG2124	Q:Secondary metabolites biosynthesis, transport and catabolism	KAF6998447.1	hypothetical protein CFC21_014567 [Triticum aestivum]	sp|Q9SRQ1|C89A9_ARATH;	Cytochrome P450 89A9 OS=Arabidopsis thaliana OX=3702 GN=CYP89A9 PE=2 SV=1;	PF00067.24	p450	Cytochrome P450
TraesCS2A02G026400	0.248333	0.895	-1.84961	-	GO:0006952;GO:0005524;GO:004353	BP:defense response;MF:ATP binding;MF:ADP binding;	------	------	------	------	COG4886	S:Function unknown	KAF6998462.1	hypothetical protein CFC21_014580 [Triticum aestivum]	sp|Q2R8L1|RGA5S_ORYSJ;	Disease resistance protein RGA5 OS=Oryza sativa subsp. japonica OX=39947 GN=RGA5 PE=2 SV=1;	PF00931.24;PF18052.3;PF13191.8;PF13401.8	NB-ARC;Rx_N;AAA_16;AAA_22	NB-ARC domain;Rx N-terminal domain;AAA ATPase domain;AAA domain
TraesCS2A02G027300	0.436667	0.023333	4.22609	-	GO:0016021;GO:0004497;GO:0016705;GO:0005506;GO:002003	CC:integral component of membrane;MF:monooxygenase activity;MF:oxidoreductase activity, acting on paired donors, with incorporation or reduction of molecular oxygen;MF:iron ion binding;MF:heme binding;	------	------	------	------	COG2124	Q:Secondary metabolites biosynthesis, transport and catabolism	KAF6998467.1	hypothetical protein CFC21_014585 [Triticum aestivum]	sp|B4FVP3|C71Z8_MAIZE;	Zealexin A1 synthase OS=Zea mays OX=4577 GN=CYP71Z18 PE=1 SV=1;	PF00067.24	p450	Cytochrome P450
TraesCS2A02G027600	0.061667	0	#DIV/0!	-	GO:0016102;GO:0010333;GO:0000287;GO:001682	BP:diterpenoid biosynthetic process;MF:terpene synthase activity;MF:magnesium ion binding;MF:lyase activity;	K04121	E4.2.3.19	map00904	Diterpenoid biosynthesis	------	------	KAF6998477.1	hypothetical protein CFC21_014594 [Triticum aestivum]	sp|Q66QH3|KSL4_ORYSI;	9-beta-pimara-7,15-diene synthase, chloroplastic OS=Oryza sativa subsp. indica OX=39946 GN=KSL4 PE=1 SV=1;	PF03936.18;PF01397.23;PF19086.2	Terpene_synth_C;Terpene_synth;Terpene_syn_C_2	Terpene synthase family, metal binding domain;Terpene synthase, N-terminal domain;Terpene synthase family 2, C-terminal metal binding
TraesCS2A02G027800	6.105	1.27833	2.25573	-	GO:0010333;GO:0000287;GO:001682	MF:terpene synthase activity;MF:magnesium ion binding;MF:lyase activity;	K14043	CPS4	map00904	Diterpenoid biosynthesis	ENOG410XNXR	I:Lipid transport and metabolism	KAF6998487.1	hypothetical protein CFC21_014604 [Triticum aestivum]	sp|Q0JF02|CPS4_ORYSJ;	Syn-copalyl diphosphate synthase, chloroplastic OS=Oryza sativa subsp. japonica OX=39947 GN=CPS4 PE=1 SV=1;	PF01397.23;PF03936.18	Terpene_synth;Terpene_synth_C	Terpene synthase, N-terminal domain;Terpene synthase family, metal binding domain
TraesCS2A02G028600	1.9875	0.6825	1.54205	-	GO:0005829;GO:0016616;GO:0016618;GO:0051287;GO:0030267;GO:000819	CC:cytosol;MF:oxidoreductase activity, acting on the CH-OH group of donors, NAD or NADP as acceptor;MF:hydroxypyruvate reductase activity;MF:NAD binding;MF:glyoxylate reductas;MF:UDP-glycosyltransferase activity;	K15919	HPR2_3	map00630;map00260	Glyoxylate and dicarboxylate metabolism;Glycine, serine and threonine metabolism	COG1052	C:Energy production and conversion	KAF6998495.1	hypothetical protein CFC21_014612 [Triticum aestivum]	sp|Q9LE33|HPR3_ARATH;	Glyoxylate/hydroxypyruvate reductase HPR3 OS=Arabidopsis thaliana OX=3702 GN=HPR3 PE=2 SV=1;	PF02826.21;PF00389.32;PF03446.17	2-Hacid_dh_C;2-Hacid_dh;NAD_binding_2	D-isomer specific 2-hydroxyacid dehydrogenase, NAD binding domain;D-isomer specific 2-hydroxyacid dehydrogenase, catalytic domain;NAD binding domain of 6-phosphogluconate dehydrogenase
TraesCS2A02G028700	10.6008	1.21833	3.1212	Glycosyltransferase [Source:UniProtKB/TrEMBL;Acc:W5B1R3]	GO:0016758;GO:000819	MF:transferase activity, transferring hexosyl groups;MF:UDP-glycosyltransferase activity;	------	------	------	------	COG1819	S:Function unknown	BAJ95038.1	predicted protein [Hordeum vulgare subsp. vulgare]	sp|F8WKW1|UGT2_GARJA;	7-deoxyloganetin glucosyltransferase OS=Gardenia jasminoides OX=114476 GN=UGT85A24 PE=1 SV=1;	PF00201.20	UDPGT	UDP-glucoronosyl and UDP-glucosyl transferase
TraesCS2A02G031500	5.87833	2.67667	1.13497	-	GO:0005524;GO:004353	MF:ATP binding;MF:ADP binding;	------	------	------	------	COG4886	S:Function unknown	KAF6998524.1	hypothetical protein CFC21_014640 [Triticum aestivum]	sp|Q7XA42|RGA1_SOLBU;	Putative disease resistance protein RGA1 OS=Solanum bulbocastanum OX=147425 GN=RGA1 PE=2 SV=2;	PF00931.24;PF12799.9;PF18052.3;PF13191.8	NB-ARC;LRR_4;Rx_N;AAA_16	NB-ARC domain;Leucine Rich repeats;Rx N-terminal domain;AAA ATPase domain
TraesCS2A02G033100	2.37167	1.0675	1.15167	-	GO:001602	CC:integral component of membrane;	------	------	------	------	------	------	KAF6998540.1	hypothetical protein CFC21_014656 [Triticum aestivum]	------	------	------	------	------
TraesCS2A02G033700	123.284	1.26083	6.61147	Heat shock protein 90 [Source:UniProtKB/TrEMBL;Acc:F4Y589]	GO:0061077;GO:0006457;GO:0009816;GO:0050821;GO:0034605;GO:0005829;GO:0005886;GO:0032991;GO:0048471;GO:0051082;GO:0000166;GO:0016887;GO:000552	BP:chaperone-mediated protein folding;BP:protein folding;BP:defense response to bacterium, incompatible interaction;BP:protein stabilization;BP:cellular response to heat;CC:cytosol;CC:plasma membrane;CC:macromolecular complex;CC:perinuclear region of cytoplasm;MF:unfolded protein binding;MF:nucleotide binding;MF:ATPase activity;MF:ATP binding;	K04079	HSP90A, htpG	map04626;map04141	Plant-pathogen interaction;Protein processing in endoplasmic reticulum	COG0326	O:Posttranslational modification, protein turnover, chaperones	ADF31754.1	heat shock protein 90 [Triticum aestivum]	sp|P51819|HSP83_IPONI;	Heat shock protein 83 OS=Ipomoea nil OX=35883 GN=HSP83A PE=2 SV=1;	PF00183.20;PF02518.28;PF13589.8	HSP90;HATPase_c;HATPase_c_3	Hsp90 protein;Histidine kinase-, DNA gyrase B-, and HSP90-like ATPase;Histidine kinase-, DNA gyrase B-, and HSP90-like ATPase
TraesCS2A02G035200	0.279167	1.22667	-2.13554	-	------	------	------	------	------	------	ENOG410YW1D	S:Function unknown	KAF6998568.1	hypothetical protein CFC21_014681 [Triticum aestivum]	------	------	PF14309.8;PF14383.8	DUF4378;VARLMGL	Domain of unknown function;DUF761-associated sequence motif
TraesCS2A02G036300	13.56	28.2825	-1.06055	-	GO:0006635;GO:0003985;GO:0016746;GO:001674	BP:fatty acid beta-oxidation;MF:acetyl-CoA C-acetyltransferase activity;MF:transferase activity, transferring acyl groups;MF:transferase activity, transferring acyl groups other than amino-acyl groups;	K00626	ACAT, atoB	map00630;map00310;map00640;map00650;map00620;map00900;map00071;map00280;map00380	Glyoxylate and dicarboxylate metabolism;Lysine degradation;Propanoate metabolism;Butanoate metabolism;Pyruvate metabolism;Terpenoid backbone biosynthesis;Fatty acid degradation;Valine, leucine and isoleucine degradation;Tryptophan metabolism	COG0183	I:Lipid transport and metabolism	KAF7013196.1	hypothetical protein CFC21_027305 [Triticum aestivum]	sp|Q8S4Y1|THIC1_ARATH;	Acetyl-CoA acetyltransferase, cytosolic 1 OS=Arabidopsis thaliana OX=3702 GN=AAT1 PE=1 SV=1;	PF00108.25;PF02803.20;PF00109.28	Thiolase_N;Thiolase_C;ketoacyl-synt	Thiolase, N-terminal domain;Thiolase, C-terminal domain;Beta-ketoacyl synthase, N-terminal domain
TraesCS2A02G037100	2.86083	16.7425	-2.54901	-	GO:0006508;GO:0004252;GO:000823	BP:proteolysis;MF:serine-type endopeptidase activity;MF:serine-type peptidase activity;	------	------	------	------	COG1404;COG4886	O:Posttranslational modification, protein turnover, chaperones;S:Function unknown	KAF6998583.1	hypothetical protein CFC21_014696 [Triticum aestivum]	sp|Q9ZSP5|AIR3_ARATH;	Subtilisin-like protease SBT5.3 OS=Arabidopsis thaliana OX=3702 GN=AIR3 PE=2 SV=1;	PF00082.24;PF17766.3;PF02225.24	Peptidase_S8;fn3_6;PA	Subtilase family;Fibronectin type-III domain;PA domain
TraesCS2A02G038500	0.1025	0.6275	-2.61399	-	------	------	------	------	------	------	------	------	KAF6998616.1	hypothetical protein CFC21_014723 [Triticum aestivum]	------	------	------	------	------
TraesCS2A02G039000	0.0375	0.485833	-3.6955	Serine/threonine-protein kinase [Source:UniProtKB/TrEMBL;Acc:A0A1D5TKX1]	GO:0006468;GO:0048544;GO:0016021;GO:0004674;GO:0106311;GO:0004672;GO:0106310;GO:000552	BP:protein phosphorylation;BP:recognition of pollen;CC:integral component of membrane;MF:protein serine/threonine kinase activity;MF:old GO;MF:protein kinase activity;MF:old GO;MF:ATP binding;	------	------	------	------	ENOG410Z08H;COG0515	T:Signal transduction mechanisms;	KAF6998611.1	hypothetical protein CFC21_014718 [Triticum aestivum]	sp|O64477|Y2913_ARATH;	G-type lectin S-receptor-like serine/threonine-protein kinase At2g19130 OS=Arabidopsis thaliana OX=3702 GN=At2g19130 PE=2 SV=1;	PF00069.27;PF07714.19;PF01453.26;PF00954.22;PF08276.13	Pkinase;PK_Tyr_Ser-Thr;B_lectin;S_locus_glycop;PAN_2	Protein kinase domain;Protein tyrosine and serine/threonine kinase;D-mannose binding lectin;S-locus glycoprotein domain;PAN-like domain
TraesCS2A02G039100	0.105833	0.449167	-2.08546	-	GO:0006468;GO:0045927;GO:0006952;GO:0016021;GO:0004674;GO:0043531;GO:0004672;GO:000552	BP:protein phosphorylation;BP:positive regulation of growth;BP:defense response;CC:integral component of membrane;MF:protein serine/threonine kinase activity;MF:ADP binding;MF:protein kinase activity;MF:ATP binding;	K17302	COPB2, SEC27	------	------	ENOG410XNNY	S:Function unknown	KAF6998610.1	hypothetical protein CFC21_014717 [Triticum aestivum]	sp|Q8GYA4|CRK10_ARATH;	Cysteine-rich receptor-like protein kinase 10 OS=Arabidopsis thaliana OX=3702 GN=CRK10 PE=1 SV=3;	PF00069.27;PF07714.19	Pkinase;PK_Tyr_Ser-Thr	Protein kinase domain;Protein tyrosine and serine/threonine kinase
TraesCS2A02G039400	1.6825	5.88917	-1.80746	-	GO:0005975;GO:0009536;GO:0102726;GO:000455	BP:carbohydrate metabolic process;CC:plastid;MF:DIMBOA glucoside beta-D-glucosidase activity;MF:hydrolase activity, hydrolyzing O-glycosyl compounds;	K05350	bglB	map00460;map00940;map00500	Cyanoamino acid metabolism;Phenylpropanoid biosynthesis;Starch and sucrose metabolism	COG2723	G:Carbohydrate transport and metabolism	XP_037482947.1	beta-glucosidase 16-like [Triticum dicoccoides]	sp|Q7XSK2|BGL16_ORYSJ;	Beta-glucosidase 16 OS=Oryza sativa subsp. japonica OX=39947 GN=BGLU16 PE=1 SV=2;	PF00232.20	Glyco_hydro_1	Glycosyl hydrolase family 1
TraesCS2A02G040600	0.565833	1.7125	-1.59766	-	GO:001674	MF:transferase activity, transferring acyl groups other than amino-acyl groups;	K13065	E2.3.1.133, HCT	map00941;map00940;map00945	Flavonoid biosynthesis;Phenylpropanoid biosynthesis;Stilbenoid, diarylheptanoid and gingerol biosynthesis	ENOG410YJ90	S:Function unknown	KAF6998636.1	hypothetical protein CFC21_014736 [Triticum aestivum]	sp|Q5SMM8|PHT1_ORYSJ;	Putrescine hydroxycinnamoyltransferase 1 OS=Oryza sativa subsp. japonica OX=39947 GN=PHT1 PE=2 SV=1;	PF02458.17	Transferase	Transferase family
TraesCS2A02G042800	0.120833	0.519167	-2.10318	-	GO:001674	MF:transferase activity, transferring acyl groups other than amino-acyl groups;	------	------	------	------	ENOG410YEZS	S:Function unknown	KAF6998661.1	hypothetical protein CFC21_014758 [Triticum aestivum]	sp|Q9SND9|Y3028_ARATH;	Uncharacterized acetyltransferase At3g50280 OS=Arabidopsis thaliana OX=3702 GN=At3g50280 PE=3 SV=1;	PF02458.17	Transferase	Transferase family
TraesCS2A02G042900	0.623333	2.74417	-2.13829	-	GO:003024	MF:carbohydrate binding;	------	------	------	------	ENOG41105C7	S:Function unknown	KAF6998662.1	hypothetical protein CFC21_014759 [Triticum aestivum]	------	------	PF01419.19	Jacalin	Jacalin-like lectin domain
TraesCS2A02G043100	4.22417	1.29167	1.70943	-	GO:2000031;GO:0006468;GO:0009862;GO:2000022;GO:0016021;GO:0004674;GO:0004672;GO:000552	BP:regulation of salicylic acid mediated signaling pathway;BP:protein phosphorylation;BP:systemic acquired resistance, salicylic acid mediated signaling pathway;BP:regulation of jasmonic acid mediated signaling pathway;CC:integral component of membrane;MF:protein serine/threonine kinase activity;MF:protein kinase activity;MF:ATP binding;	K04733	IRAK4	------	------	COG0515;ENOG410XQGS	T:Signal transduction mechanisms;	KAF6998664.1	hypothetical protein CFC21_014761 [Triticum aestivum]	sp|Q9SXB4|Y1130_ARATH;	G-type lectin S-receptor-like serine/threonine-protein kinase At1g11300 OS=Arabidopsis thaliana OX=3702 GN=At1g11300 PE=2 SV=1;	PF00069.27;PF07714.19	Pkinase;PK_Tyr_Ser-Thr	Protein kinase domain;Protein tyrosine and serine/threonine kinase
TraesCS2A02G044900	0.1	0.9225	-3.20555	Flavone synthase II (FNSII), Biosynthesis of tricin O-linked conjugate [Source: Projected from Oryza sativa (Os04g0101400)]	GO:0016021;GO:0004497;GO:0016705;GO:0005506;GO:002003	CC:integral component of membrane;MF:monooxygenase activity;MF:oxidoreductase activity, acting on paired donors, with incorporation or reduction of molecular oxygen;MF:iron ion binding;MF:heme binding;	K23180	CYP93G1	map00943;map00941	Isoflavonoid biosynthesis;Flavonoid biosynthesis	COG2124	Q:Secondary metabolites biosynthesis, transport and catabolism	KAF6998677.1	hypothetical protein CFC21_014773 [Triticum aestivum]	sp|Q0JFI2|C93G1_ORYSJ;	Cytochrome P450 93G1 OS=Oryza sativa subsp. japonica OX=39947 GN=CYP93G1 PE=1 SV=1;	PF00067.24	p450	Cytochrome P450
TraesCS2A02G050300	0.1925	1.73333	-3.17062	Sulfotransferase [Source:UniProtKB/TrEMBL;Acc:A0A1D5TLX4]	GO:000814	MF:sulfotransferase activity;	------	------	------	------	ENOG4111H56	S:Function unknown	KAF6998742.1	hypothetical protein CFC21_014833 [Triticum aestivum]	sp|Q9M1V1|SOT6_ARATH;	Cytosolic sulfotransferase 6 OS=Arabidopsis thaliana OX=3702 GN=SOT6 PE=2 SV=1;	PF00685.29;PF13469.8	Sulfotransfer_1;Sulfotransfer_3	Sulfotransferase domain;Sulfotransferase family
TraesCS2A02G056300	0.550833	0.076667	2.84494	-	GO:0016758;GO:0008194;GO:0080044;GO:008004	MF:transferase activity, transferring hexosyl groups;MF:UDP-glycosyltransferase activity;MF:quercetin 7-O-glucosyltransferase activity;MF:quercetin 3-O-glucosyltransferase activity;	------	------	------	------	COG1819	S:Function unknown	KAF6998834.1	hypothetical protein CFC21_014921 [Triticum aestivum]	sp|M0Y4P1|UGT13_HORVV;	UDP-glucosyltransferase UGT13248 OS=Hordeum vulgare subsp. vulgare OX=112509 PE=2 SV=1;	PF00201.20	UDPGT	UDP-glucoronosyl and UDP-glucosyl transferase
TraesCS2A02G057500	0.625833	0.035833	4.12642	-	GO:0016021;GO:0046872;GO:0016301;GO:000551	CC:integral component of membrane;MF:metal ion binding;MF:kinase activity;MF:protein binding;	------	------	------	------	COG4886	S:Function unknown	KAF6998852.1	hypothetical protein CFC21_014937 [Triticum aestivum]	sp|Q9C6A6|RLP13_ARATH;	Receptor-like protein 13 OS=Arabidopsis thaliana OX=3702 GN=RLP13 PE=3 SV=1;	PF13855.8;PF12799.9	LRR_8;LRR_4	Leucine rich repeat;Leucine Rich repeats
TraesCS2A02G058200	0.461667	1.675	-1.85924	-	GO:0016021;GO:000837	CC:integral component of membrane;MF:O-acyltransferase activity;	------	------	------	------	ENOG410Y3K5;ENOG41126FI	S:Function unknown;	KAF6998859.1	LOW QUALITY PROTEIN: hypothetical protein CFC21_014945 [Triticum aestivum]	sp|Q9SV07|ASAT1_ARATH;	Acyl-CoA--sterol O-acyltransferase 1 OS=Arabidopsis thaliana OX=3702 GN=ASAT1 PE=1 SV=1;	PF13813.8;PF03062.21	MBOAT_2;MBOAT	Membrane bound O-acyl transferase family;MBOAT, membrane-bound O-acyltransferase family
TraesCS2A02G061600	0.21	0.450833	-1.1022	-	GO:0045493;GO:0005975;GO:000455	BP:xylan catabolic process;BP:carbohydrate metabolic process;MF:hydrolase activity, hydrolyzing O-glycosyl compounds;	------	------	------	------	COG3693	G:Carbohydrate transport and metabolism	XP_037475454.1	endo-1,4-beta-xylanase 5-like [Triticum dicoccoides]	sp|Q84WT5|XYN5L_ARATH;	Endo-1,4-beta-xylanase 5-like OS=Arabidopsis thaliana OX=3702 GN=At4g33820 PE=2 SV=1;	PF00331.22;PF02018.19	Glyco_hydro_10;CBM_4_9	Glycosyl hydrolase family 10;Carbohydrate binding domain
TraesCS2A02G064400	0.0425	0.175833	-2.04867	-	GO:0004497;GO:0016705;GO:0005506;GO:002003	MF:monooxygenase activity;MF:oxidoreductase activity, acting on paired donors, with incorporation or reduction of molecular oxygen;MF:iron ion binding;MF:heme binding;	------	------	------	------	COG2124	Q:Secondary metabolites biosynthesis, transport and catabolism	KAF6998933.1	hypothetical protein CFC21_015012 [Triticum aestivum]	sp|Q9AXH9|KAO1_HORVU;	Ent-kaurenoic acid oxidase 1 OS=Hordeum vulgare OX=4513 GN=KAO1 PE=1 SV=1;	PF00067.24	p450	Cytochrome P450
TraesCS2A02G064900	23.6317	7.65167	1.62688	Heavy metal-associated isoprenylated protein 1 [Source:UniProtKB/TrEMBL;Acc:W5B397]	GO:0030001;GO:004687	BP:metal ion transport;MF:metal ion binding;	------	------	------	------	COG2608	S:Function unknown	XP_037475477.1	heavy metal-associated isoprenylated plant protein 27-like [Triticum dicoccoides]	sp|Q9SZN7|HIP26_ARATH;	Heavy metal-associated isoprenylated plant protein 26 OS=Arabidopsis thaliana OX=3702 GN=HIPP26 PE=1 SV=1;	PF00403.28;PF19803.1	HMA;DUF6286	Heavy-metal-associated domain;Family of unknown function
TraesCS2A02G069000	0.295	0.1425	1.04975	-	GO:0006468;GO:0016021;GO:0005524;GO:0005515;GO:000467	BP:protein phosphorylation;CC:integral component of membrane;MF:ATP binding;MF:protein binding;MF:protein kinase activity;	------	------	------	------	COG4886	S:Function unknown	KAF6998986.1	hypothetical protein CFC21_015059 [Triticum aestivum]	sp|C0LGP4|Y3475_ARATH;	Probable LRR receptor-like serine/threonine-protein kinase At3g47570 OS=Arabidopsis thaliana OX=3702 GN=At3g47570 PE=2 SV=1;	PF13855.8;PF00069.27;PF07714.19;PF12799.9;PF08263.14	LRR_8;Pkinase;PK_Tyr_Ser-Thr;LRR_4;LRRNT_2	Leucine rich repeat;Protein kinase domain;Protein tyrosine and serine/threonine kinase;Leucine Rich repeats;Leucine rich repeat N-terminal domain
TraesCS2A02G070900	0.4925	4.08	-3.05037	-	GO:0009809;GO:0016616;GO:0052747;GO:0045551;GO:0008270;GO:001649	BP:lignin biosynthetic process;MF:oxidoreductase activity, acting on the CH-OH group of donors, NAD or NADP as acceptor;MF:sinapyl alcohol dehydrogenase activity;MF:cinnamyl-alcohol dehydrogenase activity;MF:zinc ion binding;MF:oxidoreductase activity;	K00083	CAD	map00940	Phenylpropanoid biosynthesis	COG1064	C:Energy production and conversion	KAF6999010.1	hypothetical protein CFC21_015083 [Triticum aestivum]	sp|Q7XWU3|CADH6_ORYSJ;	Probable cinnamyl alcohol dehydrogenase 6 OS=Oryza sativa subsp. japonica OX=39947 GN=CAD6 PE=2 SV=2;	PF08240.14;PF00107.28;PF02826.21	ADH_N;ADH_zinc_N;2-Hacid_dh_C	Alcohol dehydrogenase GroES-like domain;Zinc-binding dehydrogenase;D-isomer specific 2-hydroxyacid dehydrogenase, NAD binding domain
TraesCS2A02G071500	0.938333	0.045833	4.35564	Flavin-containing monooxygenase [Source:UniProtKB/TrEMBL;Acc:W5B4I3]	GO:0050661;GO:0050660;GO:000449	MF:NADP binding;MF:flavin adenine dinucleotide binding;MF:N,N-dimethylaniline monooxygenase activity;	K00485	FMO	------	------	COG2072	P:Inorganic ion transport and metabolism	KAF6999015.1	hypothetical protein CFC21_015088 [Triticum aestivum]	sp|Q9LMA1|FMO1_ARATH;	Probable flavin-containing monooxygenase 1 OS=Arabidopsis thaliana OX=3702 GN=FMO1 PE=2 SV=1;	PF00743.21;PF13434.8;PF07992.16;PF13738.8;PF13450.8;PF01266.26;PF13454.8	FMO-like;K_oxygenase;Pyr_redox_2;Pyr_redox_3;NAD_binding_8;DAO;NAD_binding_9	Flavin-binding monooxygenase-like;L-lysine 6-monooxygenase;Pyridine nucleotide-disulphide oxidoreductase;Pyridine nucleotide-disulphide oxidoreductase;NA;FAD dependent oxidoreductase;FAD-NA
TraesCS2A02G071800	0.454167	1.44583	-1.67061	-	GO:0006468;GO:0016021;GO:0030247;GO:0004674;GO:0005509;GO:0004672;GO:000552	BP:protein phosphorylation;CC:integral component of membrane;MF:polysaccharide binding;MF:protein serine/threonine kinase activity;MF:calcium ion binding;MF:protein kinase activity;MF:ATP binding;	------	------	------	------	COG0515	T:Signal transduction mechanisms	KAF6999021.1	hypothetical protein CFC21_015095 [Triticum aestivum]	sp|Q9LMP1|WAK2_ARATH;	Wall-associated receptor kinase 2 OS=Arabidopsis thaliana OX=3702 GN=WAK2 PE=1 SV=1;	PF07714.19;PF00069.27;PF13947.8;PF12947.9	PK_Tyr_Ser-Thr;Pkinase;GUB_WAK_bind;EGF_3	Protein tyrosine and serine/threonine kinase;Protein kinase domain;Wall-associated receptor kinase galacturonan-binding;EGF domain
TraesCS2A02G071900	0.093333	0.875	-3.22882	-	GO:0006468;GO:0016021;GO:0030247;GO:0004674;GO:0005509;GO:0004672;GO:000552	BP:protein phosphorylation;CC:integral component of membrane;MF:polysaccharide binding;MF:protein serine/threonine kinase activity;MF:calcium ion binding;MF:protein kinase activity;MF:ATP binding;	------	------	------	------	COG0515	T:Signal transduction mechanisms	XP_037475533.1	wall-associated receptor kinase 2-like [Triticum dicoccoides]	sp|Q9LMP1|WAK2_ARATH;	Wall-associated receptor kinase 2 OS=Arabidopsis thaliana OX=3702 GN=WAK2 PE=1 SV=1;	PF07714.19;PF00069.27;PF13947.8;PF00008.29	PK_Tyr_Ser-Thr;Pkinase;GUB_WAK_bind;EGF	Protein tyrosine and serine/threonine kinase;Protein kinase domain;Wall-associated receptor kinase galacturonan-binding;EGF-like domain
TraesCS2A02G074300	0.525	0.1025	2.35669	-	GO:000551	MF:protein binding;	------	------	------	------	ENOG410Y65V	S:Function unknown	KAF6999028.1	hypothetical protein CFC21_015102 [Triticum aestivum]	------	------	------	------	------
TraesCS2A02G074400	0.321667	0	#DIV/0!	-	GO:000551	MF:protein binding;	------	------	------	------	ENOG410Y65V	S:Function unknown	KAF6999029.1	hypothetical protein CFC21_015103 [Triticum aestivum]	------	------	PF00646.35;PF12937.9	F-box;F-box-like	F-box domain;F-box-like
TraesCS2A02G076100	0.060833	0.318333	-2.38761	-	GO:001678	MF:hydrolase activity;	K14664	ILR1	------	------	COG1473	E:Amino acid transport and metabolism	XP_037475556.1	IAA-amino acid hydrolase ILR1-like 8 [Triticum dicoccoides]	sp|Q8H3C8|ILL8_ORYSJ;	IAA-amino acid hydrolase ILR1-like 8 OS=Oryza sativa subsp. japonica OX=39947 GN=ILL8 PE=2 SV=1;	PF01546.30;PF07687.16	Peptidase_M20;M20_dimer	Peptidase family M20/M25/M40;Peptidase dimerisation domain
TraesCS2A02G076600	5.38167	1.86667	1.52759	L-lactate dehydrogenase [Source:UniProtKB/TrEMBL;Acc:A0A1D6DF81]	GO:0005975;GO:0019752;GO:0005737;GO:0016616;GO:0003824;GO:0004459;GO:001649	BP:carbohydrate metabolic process;BP:carboxylic acid metabolic process;CC:cytoplasm;MF:oxidoreductase activity, acting on the CH-OH group of donors, NAD or NADP as acceptor;MF:catalytic activity;MF:L-lactate dehydrogenase activity;MF:oxidoreductase activity;	K00016	LDH, ldh	map00270;map00640;map00620;map00010	Cysteine and methionine metabolism;Propanoate metabolism;Pyruvate metabolism;Glycolysis / Gluconeogenesis	COG0039	C:Energy production and conversion	KAF6999046.1	hypothetical protein CFC21_015120 [Triticum aestivum]	sp|P22988|LDHA_HORVU;	L-lactate dehydrogenase A OS=Hordeum vulgare OX=4513 PE=1 SV=1;	PF00056.25;PF02866.20;PF03807.19	Ldh_1_N;Ldh_1_C;F420_oxidored	lactate/malate dehydrogenase, NAD binding domain;lactate/malate dehydrogenase, alpha/beta C-terminal domain;NADP oxidoreductase coenzyme F420-dependent
TraesCS2A02G077300	0.1925	0.024167	2.99375	-	------	------	------	------	------	------	------	------	KAF6999054.1	hypothetical protein CFC21_015129 [Triticum aestivum]	------	------	------	------	------
TraesCS2A02G081400	13.12	5.1325	1.35403	-	GO:0006468;GO:0004674;GO:0005524;GO:000467	BP:protein phosphorylation;MF:protein serine/threonine kinase activity;MF:ATP binding;MF:protein kinase activity;	------	------	------	------	COG0515	T:Signal transduction mechanisms	KAF6999103.1	hypothetical protein CFC21_015173 [Triticum aestivum]	sp|Q0WRY5|PBL7_ARATH;	Probable serine/threonine-protein kinase PBL7 OS=Arabidopsis thaliana OX=3702 GN=PBL7 PE=1 SV=1;	PF07714.19;PF00069.27	PK_Tyr_Ser-Thr;Pkinase	Protein tyrosine and serine/threonine kinase;Protein kinase domain
TraesCS2A02G081500	0.2125	1.05417	-2.31057	-	GO:001602	CC:integral component of membrane;	------	------	------	------	ENOG41121N2	O:Posttranslational modification, protein turnover, chaperones	KAF6999104.1	hypothetical protein CFC21_015174 [Triticum aestivum]	sp|Q8RX29|ATL70_ARATH;	RING-H2 finger protein ATL70 OS=Arabidopsis thaliana OX=3702 GN=ATL70 PE=2 SV=1;	PF13639.8;PF17123.7;PF13923.8;PF12678.9;PF00097.27;PF13445.8;PF12861.9;PF14634.8;PF13441.8	zf-RING_2;zf-RING_11;zf-C3HC4_2;zf-rbx1;zf-C3HC4;zf-RING_UBOX;zf-ANAPC11;zf-RING_5;Gly-zipper_YMGG	Ring finger domain;RING-like zinc finger;Zinc finger, C3HC4 type;RING-H2 zinc finger domain;Zinc finger, C3HC4 type;RING-type zinc-finger;Anaphase-promoting complex subunit 11 RING-H2 finger;zinc-RING finger domain;YMGG-like Gly-zipper
TraesCS2A02G084400	1.60583	6.75833	-2.07335	-	------	------	------	------	------	------	ENOG410YMY7	S:Function unknown	KAF6999139.1	hypothetical protein CFC21_015206 [Triticum aestivum]	------	------	PF14009.8	PADRE	PADRE domain
TraesCS2A02G084500	1.11333	4.5125	-2.01904	-	------	------	------	------	------	------	ENOG410YMY7	S:Function unknown	VAH25879.1	unnamed protein product [Triticum turgidum subsp. durum]	------	------	PF14009.8	PADRE	PADRE domain
[truncated: 4,728 more rows]

## Sheet: S2-2 DEGs of Mn_vs_CK
Total DEGs of Mn
[truncated: 4,166 more rows]

## Sheet: S2-3 Al exclusively DEGs
DEGs of exclusively response to Al
[truncated: 3,505 more rows]

[truncated: 3 more sheets: S2-4 Mn exclusively DEGs, S2-5 DEGs in the same direction, S2-6 DEGs in opposite direction]
