# Supplementary material for: Physiological and Transcriptomic Analyses Reveal Commonalities and Specificities in Wheat in Response to Aluminum and Manganese
Source: Preprints.org preprint supplement (doi:10.20944/preprints202312.0299.v1), 2023-12-06
Supplement: Supplementary file 2 [file TableS1-Primers used for qRT-PCR.xlsx]

## Sheet: S1 Primers for qRT-PCR
Primers for qRT-PCR
Genes name	Forward Primer (5'-3')	Reverse Primer (5'-3')
TaActin	ACCTGTACGGCAACATTGTG	GCTGAGTGAGGCTAGGATGG
ASMT3	ATCCAAGGCGTCTCGGCTCAG	CAATCCTCGTCGCTCCAGTTATGC
B561J	CCATCGCCGCCTCATCATTCTC	GCACGACGCATAGAGCTGGTTG
CPT	CGATGCCCGCTCCTTGACAAG	AGGAGAGGTCGTTGAGGATGCC
DHN3	ATGGGCGGGAGGAGGAAGAAG	CCTTGCTGTCCGTAGGTGTTGTC
GL41	GCTCCAGGACTTCTGCGTTGC	GTCGTTCGCCGTCACCATCTTC
GLO1A	TTCCCGTTCAACCCGACAAAGC	TCTGGCAGTTCCCTCCTAAGTAGTG
GSTZ1	CCCATCCTGCCGACTGACC	CGAGGTTCTCTTTTGCGTCCA
HFB2A	AGACCGACGACACCATCTCCTG	GCGAAGTTGCTGTGCTTGAAGTTC
HS26M	TACGACGACGAGGACGACGAC	AGAGAAGCCGGGGACGAAGAAG
HsfA2-14	CGGCCTATAGACAATGCTCCA	GCTCCTGAATGTTCTGCGCTA
Hsp20	GGAGGTCAAGGTGGAGGTGGAG	CTGACGAACTTGCCGCTGCTG
Hsp21	CGACAACGCCGACATGGAGAAG	AGGCGACCTGGACCTGGATTG
MATK	CCGATGCCTGCCATTGTCGTG	AACGGCATAGGCACGTTCACATTC
PELPK1	TTCCTCGTCGGGTTGCTCCTC	GAATAGTGGCAGCTCGACCTTGG
PPA29	CTGCCTCCTATGCCTGCTGTTC	ATCGTTGGCACCGTCACCTTG
PPT3	CAACCAGACCAGGAATGTGCTCAG	TCAGAGGCAACGATAGGAGGAAGG
Prx111-L	GGCTGCACTTCCATGATTGCT	ACACGGCTTCCACATCCTT
RBR3B	GGCGACATCAAGGTGCAGGTG	ACTTGGCGTCCTCCTTCTCCTC
TDRD12	CGAGAACGCCGACATGGAGAAG	AGGCAACCTGGACCTGGATGG
THLP1	GAGACGGTGGACGGGGAAGAG	CCGCCTGGGCTTGATGATGTTC
TIP4-1	GCATCCTCCTCCGCTACCTCTC	TGACCTCCATGACCAGCCCTTG
