# Supplementary material for: Physiological and Transcriptomic Analyses Reveal Commonalities and Specificities in Wheat in Response to Aluminum and Manganese
Source: Preprints.org preprint supplement (doi:10.20944/preprints202312.0299.v1), 2023-12-06
Supplement: Supplementary file 4 [file TableS3-Expression and functional annotation of genes in 5 MEs (5 sheets contained).xlsx]

## Sheet: TableS3-1 MEmidmightblue
Gene_id	CK	Al	Mn	Gene_description	GO_id	GO_term	KO_id	KO_name	Pathway_id	Pathway_definition	COG_id	COG_Functional Categories	NR_hit-name	NR_description	Swiss-Prot_hit-name	Swiss-Prot_description	Pfam_id	Domain	Domain description
TraesCSU02G195900	20.7133	2.81333	90.2717	Dirigent protein [Source:UniProtKB/TrEMBL;Acc:A0A1D5T2Q6]	GO:0048046;GO:000557	CC:apoplast;CC:extracellular region;	------	------	------	------	ENOG41108DU;ENOG4110572	S:Function unknown;	KAF6992744.1	hypothetical protein CFC21_009707 [Triticum aestivum]	------	------	PF03018.16	Dirigent	Dirigent-like protein
TraesCSU02G125500	1.0975	1.9825	204.268	Nicotianamine synthase [Source:UniProtKB/TrEMBL;Acc:W5EHE0]	GO:0030418;GO:003041	BP:nicotianamine biosynthetic process;MF:nicotianamine synthase activity;	K05953	E2.5.1.43	------	------	ENOG4111NF0	E:Amino acid transport and metabolism	AHG95976.1	nicotianamine synthase [Triticum aestivum]	sp|Q9ZQV7|NAS2_HORVU;	Probable nicotianamine synthase 2 OS=Hordeum vulgare OX=4513 GN=NAS2 PE=2 SV=1;	PF03059.18	NAS	Nicotianamine synthase protein
TraesCSU02G125200	2.7775	1.6825	85.6867	Nicotianamine synthase [Source:UniProtKB/TrEMBL;Acc:W5EHE0]	GO:0030418;GO:003041	BP:nicotianamine biosynthetic process;MF:nicotianamine synthase activity;	K05953	E2.5.1.43	------	------	ENOG4111NF0	E:Amino acid transport and metabolism	AHG95976.1	nicotianamine synthase [Triticum aestivum]	sp|Q9ZQV7|NAS2_HORVU;	Probable nicotianamine synthase 2 OS=Hordeum vulgare OX=4513 GN=NAS2 PE=2 SV=1;	PF03059.18	NAS	Nicotianamine synthase protein
TraesCS7D02G518500	5.09917	3.77167	7.04167	-	GO:0006468;GO:0004674;GO:0005524;GO:000467	BP:protein phosphorylation;MF:protein serine/threonine kinase activity;MF:ATP binding;MF:protein kinase activity;	------	------	------	------	COG0515	T:Signal transduction mechanisms	KAF7111707.1	hypothetical protein CFC21_111687 [Triticum aestivum]	sp|Q65XV8|RK176_ORYSJ;	Receptor-like cytoplasmic kinase 176 OS=Oryza sativa subsp. japonica OX=39947 GN=RLCK176 PE=1 SV=1;	PF07714.19;PF00069.27	PK_Tyr_Ser-Thr;Pkinase	Protein tyrosine and serine/threonine kinase;Protein kinase domain
TraesCS7D02G420100	2.915	2.62833	5.00167	-	GO:0035435;GO:0015786;GO:0010044;GO:0012506;GO:0016020;GO:0005774;GO:0005886;GO:0042626;GO:0005315;GO:0005460;GO:0016887;GO:000552	BP:phosphate ion transmembrane transport;BP:UDP-glucose transport;BP:response to aluminum ion;CC:vesicle membrane;CC:membrane;CC:vacuolar membrane;CC:plasma membrane;MF:ATPase activity, coupled to transmembrane movement of substances;MF:inorganic phosphate transmembrane transporter activity;MF:UDP-glucose transmembrane transporter activity;MF:ATPase activity;MF:ATP binding;	K02068	STAR1, fetA	------	------	COG1117	P:Inorganic ion transport and metabolism	XP_020147017.1	protein STAR1 [Aegilops tauschii subsp. strangulata]	sp|Q0D9V6|STAR1_ORYSJ;	Protein STAR1 OS=Oryza sativa subsp. japonica OX=39947 GN=STAR1 PE=1 SV=1;	PF00005.29;PF13304.8;PF13555.8;PF13191.8;PF13604.8;PF13401.8	ABC_tran;AAA_21;AAA_29;AAA_16;AAA_30;AAA_22	ABC transporter;AAA domain, putative AbiEii toxin, Type IV TA system;P-loop containing region of AAA domain;AAA ATPase domain;AAA domain;AAA domain
TraesCS7D02G232300	18.7075	11.6233	81.33	Formate dehydrogenase, mitochondrial [Source:UniProtKB/TrEMBL;Acc:W5IA32]	GO:0042183;GO:0009326;GO:0005739;GO:0009507;GO:0016616;GO:0008863;GO:0051287;GO:001649	BP:formate catabolic process;CC:formate dehydrogenase complex;CC:mitochondrion;CC:chloroplast;MF:oxidoreductase activity, acting on the CH-OH group of donors, NAD or NADP as acceptor;MF:formate dehydrogenas;MF:NAD binding;MF:oxidoreductase activity;	K00122	FDH	map00630	Glyoxylate and dicarboxylate metabolism	COG1052	C:Energy production and conversion	XP_020180000.1	formate dehydrogenase, mitochondrial [Aegilops tauschii subsp. strangulata]	sp|Q9ZRI8|FDH_HORVU;	Formate dehydrogenase, mitochondrial OS=Hordeum vulgare OX=4513 PE=2 SV=1;	PF02826.21;PF00389.32	2-Hacid_dh_C;2-Hacid_dh	D-isomer specific 2-hydroxyacid dehydrogenase, NAD binding domain;D-isomer specific 2-hydroxyacid dehydrogenase, catalytic domain
TraesCS7D02G218600	3.4425	3.7425	8.235	-	GO:0016021;GO:001602	CC:integral component of membrane;CC:membrane;	------	------	------	------	COG0666	S:Function unknown	KAF7108049.1	hypothetical protein CFC21_108597 [Triticum aestivum]	------	------	PF13962.8	PGG	Domain of unknown function
TraesCS7D02G034600	3.91167	2.75833	10.6067	-	GO:001602	CC:integral component of membrane;	------	------	------	------	COG0666	S:Function unknown	KAF7105925.1	hypothetical protein CFC21_106695 [Triticum aestivum]	------	------	PF13962.8	PGG	Domain of unknown function
TraesCS7B02G130600	5.63167	6.72583	131.689	Formate dehydrogenase, mitochondrial [Source:UniProtKB/TrEMBL;Acc:W5IA32]	GO:0042183;GO:0009326;GO:0005739;GO:0009507;GO:0016616;GO:0008863;GO:0051287;GO:001649	BP:formate catabolic process;CC:formate dehydrogenase complex;CC:mitochondrion;CC:chloroplast;MF:oxidoreductase activity, acting on the CH-OH group of donors, NAD or NADP as acceptor;MF:formate dehydrogenas;MF:NAD binding;MF:oxidoreductase activity;	K00122	FDH	map00630	Glyoxylate and dicarboxylate metabolism	COG1052	C:Energy production and conversion	XP_020180000.1	formate dehydrogenase, mitochondrial [Aegilops tauschii subsp. strangulata]	sp|Q9ZRI8|FDH_HORVU;	Formate dehydrogenase, mitochondrial OS=Hordeum vulgare OX=4513 PE=2 SV=1;	PF02826.21;PF00389.32	2-Hacid_dh_C;2-Hacid_dh	D-isomer specific 2-hydroxyacid dehydrogenase, NAD binding domain;D-isomer specific 2-hydroxyacid dehydrogenase, catalytic domain
TraesCS7B02G124200	4.16583	3.84833	10.6367	-	GO:0016021;GO:001602	CC:integral component of membrane;CC:membrane;	------	------	------	------	COG0666	S:Function unknown	KAF7100767.1	hypothetical protein CFC21_102238 [Triticum aestivum]	------	------	PF13962.8	PGG	Domain of unknown function
TraesCS7A02G002700	4.04833	3.17917	5.185	-	GO:001674	MF:transferase activity, transferring acyl groups other than amino-acyl groups;	------	------	------	------	ENOG410YJ90	S:Function unknown	XP_037456541.1	protein ENHANCED PSEUDOMONAS SUSCEPTIBILITY 1-like [Triticum dicoccoides]	sp|Q9FH97|EPS1_ARATH;	Protein ENHANCED PSEUDOMONAS SUSCEPTIBILITY 1 OS=Arabidopsis thaliana OX=3702 GN=EPS1 PE=2 SV=1;	PF02458.17	Transferase	Transferase family
TraesCS6D02G370800	1.4375	1.76333	204.667	Nicotianamine synthase [Source:UniProtKB/TrEMBL;Acc:W5GUB7]	GO:0030418;GO:003041	BP:nicotianamine biosynthetic process;MF:nicotianamine synthase activity;	K05953	E2.5.1.43	------	------	ENOG4111NF0	E:Amino acid transport and metabolism	AND77090.1	nicotianamine synthase [Triticum aestivum]	sp|Q9ZQV6|NAS4_HORVU;	Probable nicotianamine synthase 4 OS=Hordeum vulgare OX=4513 GN=NAS4 PE=2 SV=1;	PF03059.18	NAS	Nicotianamine synthase protein
TraesCS6D02G264000	4.44833	4.09583	14.5258	-	GO:0006508;GO:000419	BP:proteolysis;MF:aspartic-type endopeptidase activity;	------	------	------	------	ENOG410XNV7	O:Posttranslational modification, protein turnover, chaperones	XP_020157927.1	aspartyl protease family protein At5g10770 [Aegilops tauschii subsp. strangulata]	sp|Q8S9J6|ASPA_ARATH;	Aspartyl protease family protein At5g10770 OS=Arabidopsis thaliana OX=3702 GN=At5g10770 PE=2 SV=1;	PF14543.8;PF14541.8;PF00026.25	TAXi_N;TAXi_C;Asp	Xylanase inhibitor N-terminal;Xylanase inhibitor C-terminal;Eukaryotic aspartyl protease
TraesCS6D02G223100	1.1925	1.90833	27.6092	-	GO:0055085;GO:0016021;GO:0005886;GO:003567	BP:transmembrane transport;CC:integral component of membrane;CC:plasma membrane;MF:oligopeptide transmembrane transporter activity;	------	------	------	------	COG1297	S:Function unknown	KAF7090237.1	hypothetical protein CFC21_093019 [Triticum aestivum]	sp|Q6H3Z3|YSL15_ORYSJ;	Iron-phytosiderophore transporter YSL15 OS=Oryza sativa subsp. japonica OX=39947 GN=YSL15 PE=2 SV=1;	PF03169.17	OPT	OPT oligopeptide transporter protein
TraesCS6D02G153600	2.34917	2.5725	9.9	Heavy metal P1B-type ATPase, Cu-transporting ATPase, Control of Cu accumulation in rice grai [Source: Projected from Oryza sativa (Os02g0196600)]	GO:0006812;GO:0016021;GO:0046872;GO:0140603;GO:0005215;GO:0000166;GO:0043682;GO:0019829;GO:0005507;GO:000552	BP:cation transport;CC:integral component of membrane;MF:metal ion binding;MF:old GO;MF:transporter activity;MF:nucleotide binding;MF:copper-transporting ATPase activity;MF:cation-transporting ATPase activity;MF:copper ion binding;MF:ATP binding;	K17686	copA, ctpA, ATP7	map04016	MAPK signaling pathway - plant	COG2217	P:Inorganic ion transport and metabolism	KAF7089256.1	hypothetical protein CFC21_092268 [Triticum aestivum]	sp|Q6H7M3|HMA4_ORYSJ;	Copper-transporting ATPase HMA4 OS=Oryza sativa subsp. japonica OX=39947 GN=HMA4 PE=1 SV=1;	PF00122.22;PF00702.28;PF00403.28;PF08282.14	E1-E2_ATPase;Hydrolase;HMA;Hydrolase_3	E1-E2 ATPase;haloacid dehalogenase-like hydrolase;Heavy-metal-associated domain;haloacid dehalogenase-like hydrolase
TraesCS6D02G148600	2.1225	1.405	325.459	-	GO:0030418;GO:003041	BP:nicotianamine biosynthetic process;MF:nicotianamine synthase activity;	K05953	E2.5.1.43	------	------	ENOG41120F9;ENOG4111NF0	S:Function unknown;E:Amino acid transport and metabolism	XP_020156496.1	nicotianamine synthase 1 [Aegilops tauschii subsp. strangulata]	sp|Q9ZQV9|NAS1_HORVU;	Nicotianamine synthase 1 OS=Hordeum vulgare OX=4513 GN=NAS1 PE=1 SV=3;	PF03059.18;PF13649.8	NAS;Methyltransf_25	Nicotianamine synthase protein;Methyltransferase domain
TraesCS6D02G148200	10.0567	11.5425	103.376	Nicotianamine synthase [Source:UniProtKB/TrEMBL;Acc:A0A172Q4H3]	GO:0030418;GO:003041	BP:nicotianamine biosynthetic process;MF:nicotianamine synthase activity;	K05953	E2.5.1.43	------	------	ENOG41120F9;ENOG4111NF0	S:Function unknown;E:Amino acid transport and metabolism	AND77091.1	nicotianamine synthase [Triticum aestivum]	sp|Q9ZQV9|NAS1_HORVU;	Nicotianamine synthase 1 OS=Hordeum vulgare OX=4513 GN=NAS1 PE=1 SV=3;	PF03059.18;PF13649.8	NAS;Methyltransf_25	Nicotianamine synthase protein;Methyltransferase domain
TraesCS6D02G148000	1.06333	0.67	204.327	-	GO:0030418;GO:003041	BP:nicotianamine biosynthetic process;MF:nicotianamine synthase activity;	K05953	E2.5.1.43	------	------	ENOG41120F9;ENOG4111NF0	S:Function unknown;E:Amino acid transport and metabolism	XP_020162646.1	nicotianamine synthase 1 [Aegilops tauschii subsp. strangulata]	sp|Q9ZQV9|NAS1_HORVU;	Nicotianamine synthase 1 OS=Hordeum vulgare OX=4513 GN=NAS1 PE=1 SV=3;	PF03059.18;PF13649.8	NAS;Methyltransf_25	Nicotianamine synthase protein;Methyltransferase domain
TraesCS6D02G106200	5.78167	7.195	17.1317	-	GO:001602	CC:integral component of membrane;	------	------	------	------	ENOG41106IH;ENOG41106H5;ENOG41106I5	S:Function unknown;	XP_020155929.2	uncharacterized protein LOC109741262 [Aegilops tauschii subsp. strangulata]	------	------	PF03168.15	LEA_2	Late embryogenesis abundant protein
TraesCS6D02G076600	11.6242	8.71333	18.7392	-	GO:0006952;GO:0005524;GO:004353	BP:defense response;MF:ATP binding;MF:ADP binding;	------	------	------	------	COG4886	S:Function unknown	KAF7088332.1	hypothetical protein CFC21_091453 [Triticum aestivum]	sp|F7J0N2|RGA5R_ORYSJ;	Disease resistance protein RGA5 OS=Oryza sativa subsp. japonica OX=39947 GN=RGA5 PE=1 SV=1;	PF00931.24;PF18052.3	NB-ARC;Rx_N	NB-ARC domain;Rx N-terminal domain
TraesCS6B02G425200	0.875833	0.7525	158.084	-	GO:0030418;GO:003041	BP:nicotianamine biosynthetic process;MF:nicotianamine synthase activity;	K05953	E2.5.1.43	------	------	ENOG4111NF0	E:Amino acid transport and metabolism	KAF7086867.1	hypothetical protein CFC21_090123 [Triticum aestivum]	sp|Q9ZQV6|NAS4_HORVU;	Probable nicotianamine synthase 4 OS=Hordeum vulgare OX=4513 GN=NAS4 PE=2 SV=1;	PF03059.18	NAS	Nicotianamine synthase protein
TraesCS6B02G192400	4.22833	4.89583	20.7175	Heavy metal P1B-type ATPase, Cu-transporting ATPase, Control of Cu accumulation in rice grai [Source: Projected from Oryza sativa (Os02g0196600)]	GO:0006812;GO:0030001;GO:0016021;GO:0046872;GO:0140603;GO:0005215;GO:0000166;GO:0043682;GO:0019829;GO:0005507;GO:000552	BP:cation transport;BP:metal ion transport;CC:integral component of membrane;MF:metal ion binding;MF:old GO;MF:transporter activity;MF:nucleotide binding;MF:copper-transporting ATPase activity;MF:cation-transporting ATPase activity;MF:copper ion binding;MF:ATP binding;	K17686	copA, ctpA, ATP7	map04016	MAPK signaling pathway - plant	COG2217	P:Inorganic ion transport and metabolism	KAF7084122.1	hypothetical protein CFC21_087806 [Triticum aestivum]	sp|Q6H7M3|HMA4_ORYSJ;	Copper-transporting ATPase HMA4 OS=Oryza sativa subsp. japonica OX=39947 GN=HMA4 PE=1 SV=1;	PF00122.22;PF00702.28;PF00403.28;PF08282.14	E1-E2_ATPase;Hydrolase;HMA;Hydrolase_3	E1-E2 ATPase;haloacid dehalogenase-like hydrolase;Heavy-metal-associated domain;haloacid dehalogenase-like hydrolase
TraesCS6B02G187400	0.933333	0.835833	138.903	-	GO:0030418;GO:003041	BP:nicotianamine biosynthetic process;MF:nicotianamine synthase activity;	K05953	E2.5.1.43	------	------	ENOG41120F9;ENOG4111NF0	S:Function unknown;E:Amino acid transport and metabolism	XP_037455926.1	nicotianamine synthase 1 [Triticum dicoccoides]	sp|Q9ZQV9|NAS1_HORVU;	Nicotianamine synthase 1 OS=Hordeum vulgare OX=4513 GN=NAS1 PE=1 SV=3;	PF03059.18;PF13649.8	NAS;Methyltransf_25	Nicotianamine synthase protein;Methyltransferase domain
TraesCS6B02G186000	0.798333	0.565833	195.215	-	GO:0030418;GO:003041	BP:nicotianamine biosynthetic process;MF:nicotianamine synthase activity;	K05953	E2.5.1.43	------	------	ENOG41120F9;ENOG4111NF0	S:Function unknown;E:Amino acid transport and metabolism	KAF7084056.1	hypothetical protein CFC21_087749 [Triticum aestivum]	sp|Q9ZQV9|NAS1_HORVU;	Nicotianamine synthase 1 OS=Hordeum vulgare OX=4513 GN=NAS1 PE=1 SV=3;	------	------	------
TraesCS6B02G152600	2.83583	3.14833	4.83083	-	GO:0006468;GO:0016021;GO:0005524;GO:0005515;GO:000467	BP:protein phosphorylation;CC:integral component of membrane;MF:ATP binding;MF:protein binding;MF:protein kinase activity;	------	------	------	------	COG4886;COG0515	S:Function unknown;T:Signal transduction mechanisms	KAF7083633.1	hypothetical protein CFC21_087399 [Triticum aestivum]	sp|Q9C7S5|PSYR1_ARATH;	Tyrosine-sulfated glycopeptide receptor 1 OS=Arabidopsis thaliana OX=3702 GN=PSY1R PE=1 SV=1;	PF00069.27;PF13855.8;PF07714.19;PF12799.9;PF00560.35;PF08263.14	Pkinase;LRR_8;PK_Tyr_Ser-Thr;LRR_4;LRR_1;LRRNT_2	Protein kinase domain;Leucine rich repeat;Protein tyrosine and serine/threonine kinase;Leucine Rich repeats;Leucine Rich Repeat;Leucine rich repeat N-terminal domain
TraesCS6A02G165200	0.548333	0.49	109.928	-	GO:0030418;GO:003041	BP:nicotianamine biosynthetic process;MF:nicotianamine synthase activity;	K05953	E2.5.1.43	------	------	ENOG41120F9;ENOG4111NF0	S:Function unknown;E:Amino acid transport and metabolism	KAF7078650.1	hypothetical protein CFC21_083051 [Triticum aestivum]	sp|Q9ZQV9|NAS1_HORVU;	Nicotianamine synthase 1 OS=Hordeum vulgare OX=4513 GN=NAS1 PE=1 SV=3;	------	------	------
TraesCS6A02G163100	0.321667	0.1325	135.545	Nicotianamine synthase [Source:UniProtKB/TrEMBL;Acc:A0A172Q4G7]	GO:0030418;GO:003041	BP:nicotianamine biosynthetic process;MF:nicotianamine synthase activity;	K05953	E2.5.1.43	------	------	ENOG41120F9;ENOG4111NF0	S:Function unknown;E:Amino acid transport and metabolism	AND77089.1	nicotianamine synthase [Triticum aestivum]	sp|Q9ZQV9|NAS1_HORVU;	Nicotianamine synthase 1 OS=Hordeum vulgare OX=4513 GN=NAS1 PE=1 SV=3;	PF03059.18;PF13649.8	NAS;Methyltransf_25	Nicotianamine synthase protein;Methyltransferase domain
TraesCS6A02G158900	3.02167	3.31167	16.8975	Heavy metal P1B-type ATPase, Cu-transporting ATPase, Control of Cu accumulation in rice grai [Source: Projected from Oryza sativa (Os02g0196600)]	GO:0006812;GO:0016021;GO:0046872;GO:0140603;GO:0005215;GO:0000166;GO:0043682;GO:0019829;GO:0005507;GO:000552	BP:cation transport;CC:integral component of membrane;MF:metal ion binding;MF:old GO;MF:transporter activity;MF:nucleotide binding;MF:copper-transporting ATPase activity;MF:cation-transporting ATPase activity;MF:copper ion binding;MF:ATP binding;	K17686	copA, ctpA, ATP7	map04016	MAPK signaling pathway - plant	COG2217	P:Inorganic ion transport and metabolism	KAF7078576.1	hypothetical protein CFC21_082988 [Triticum aestivum]	sp|Q6H7M3|HMA4_ORYSJ;	Copper-transporting ATPase HMA4 OS=Oryza sativa subsp. japonica OX=39947 GN=HMA4 PE=1 SV=1;	PF00122.22;PF00702.28;PF00403.28;PF08282.14	E1-E2_ATPase;Hydrolase;HMA;Hydrolase_3	E1-E2 ATPase;haloacid dehalogenase-like hydrolase;Heavy-metal-associated domain;haloacid dehalogenase-like hydrolase
TraesCS6A02G158700	3.81667	3.095	7.17	-	GO:0030001;GO:0071577;GO:0055085;GO:0016021;GO:0016020;GO:0005886;GO:0005385;GO:004687	BP:metal ion transport;BP:zinc II ion transmembrane transport;BP:transmembrane transport;CC:integral component of membrane;CC:membrane;CC:plasma membrane;MF:zinc ion transmembrane transporter activity;MF:metal ion transmembrane transporter activity;	K07238	TC.ZIP, zupT, ZRT3, ZIP2	------	------	COG0428	P:Inorganic ion transport and metabolism	XP_020179716.1	zinc transporter ZTP29 isoform X2 [Aegilops tauschii subsp. strangulata]	sp|Q940Q3|ZTP29_ARATH;	Zinc transporter ZTP29 OS=Arabidopsis thaliana OX=3702 GN=ZTP29 PE=2 SV=1;	PF02535.24	Zip	ZIP Zinc transporter
TraesCS6A02G093000	0.485833	0.389167	125.035	-	GO:0030418;GO:003041	BP:nicotianamine biosynthetic process;MF:nicotianamine synthase activity;	K05953	E2.5.1.43	------	------	ENOG4111NF0	E:Amino acid transport and metabolism	VAI43062.1	unnamed protein product [Triticum turgidum subsp. durum]	sp|Q9ZQV6|NAS4_HORVU;	Probable nicotianamine synthase 4 OS=Hordeum vulgare OX=4513 GN=NAS4 PE=2 SV=1;	PF03059.18;PF13649.8	NAS;Methyltransf_25	Nicotianamine synthase protein;Methyltransferase domain
TraesCS5D02G375200	3.6875	2.185	5.93667	-	GO:0006468;GO:0016021;GO:0016020;GO:0030247;GO:0004674;GO:0005509;GO:0004672;GO:000552	BP:protein phosphorylation;CC:integral component of membrane;CC:membrane;MF:polysaccharide binding;MF:protein serine/threonine kinase activity;MF:calcium ion binding;MF:protein kinase activity;MF:ATP binding;	------	------	------	------	COG0515	T:Signal transduction mechanisms	KAF7074398.1	hypothetical protein CFC21_079271 [Triticum aestivum]	sp|Q9LMN7|WAK5_ARATH;	Wall-associated receptor kinase 5 OS=Arabidopsis thaliana OX=3702 GN=WAK5 PE=2 SV=1;	PF00069.27;PF07714.19;PF13947.8;PF07645.17;PF12662.9	Pkinase;PK_Tyr_Ser-Thr;GUB_WAK_bind;EGF_CA;cEGF	Protein kinase domain;Protein tyrosine and serine/threonine kinase;Wall-associated receptor kinase galacturonan-binding;Calcium-binding EGF domain;Complement Clr-like EGF-like
TraesCS5D02G243100	12.2817	9.405	34.375	-	GO:0009058;GO:0005737;GO:0009507;GO:0003824;GO:0016212;GO:0008483;GO:003017	BP:biosynthetic process;CC:cytoplasm;CC:chloroplast;MF:catalytic activity;MF:kynurenine-oxoglutarate transaminase activity;MF:transaminase activity;MF:pyridoxal phosphate binding;	K23977	GTK	map00270	Cysteine and methionine metabolism	COG0436	E:Amino acid transport and metabolism	KAF7072808.1	hypothetical protein CFC21_077891 [Triticum aestivum]	sp|P9WPZ4|DAPC_MYCTO;	Probable N-succinyldiaminopimelate aminotransferase DapC OS=Mycobacterium tuberculosis;	PF00155.23;PF01053.22;PF00266.21;PF01041.19;PF01212.23	Aminotran_1_2;Cys_Met_Meta_PP;Aminotran_5;DegT_DnrJ_EryC1;Beta_elim_lyase	Aminotransferase class I and II;Cys/Met metabolism PLP-dependent enzyme;Aminotransferase class-V;DegT/DnrJ/EryC1/StrS aminotransferase family;Beta-eliminating lyase
TraesCS5D02G073400	7.46083	6.94833	23.4958	-	GO:0003824;GO:005066	MF:catalytic activity;MF:coenzyme binding;	K09753	CCR	map00940	Phenylpropanoid biosynthesis	COG0451	M:Cell wall/membrane/envelope biogenesis	KAF7054158.1	hypothetical protein CFC21_061894 [Triticum aestivum]	sp|A0A059TC02|CCR1_PETHY;	Cinnamoyl-CoA reductase 1 OS=Petunia hybrida OX=4102 GN=CCR1 PE=1 SV=1;	PF01370.23;PF01073.21;PF13460.8;PF16363.7;PF07993.14;PF05368.15;PF08659.12;PF02719.17	Epimerase;3Beta_HSD;NAD_binding_10;GDP_Man_Dehyd;NAD_binding_4;NmrA;KR;Polysacc_synt_2	NAD dependent epimerase/dehydratase family;3-beta hydroxysteroid dehydrogenase/isomerase family;NA;GDP-mannose 4,6 dehydratase;Male sterility protein;NmrA-like family;KR domain;Polysaccharide biosynthesis protein
TraesCS5B02G463400	27.6008	20.5725	67.9892	-	GO:001602	CC:integral component of membrane;	------	------	------	------	ENOG41106IA;ENOG41103SJ	S:Function unknown;	EMS55283.1	hypothetical protein TRIUR3_33991 [Triticum urartu]	sp|Q7Y0F2|NRX12_ORYSJ;	Probable nucleoredoxin 1-2 OS=Oryza sativa subsp. japonica OX=39947 GN=Os03g0405900 PE=2 SV=1;	PF03107.18	C1_2	C1 domain
TraesCS5B02G463300	16.8183	14.2742	42.6592	-	GO:001602	CC:integral component of membrane;	------	------	------	------	ENOG41106IA	S:Function unknown	EMS55283.1	hypothetical protein TRIUR3_33991 [Triticum urartu]	------	------	PF03107.18	C1_2	C1 domain
TraesCS5B02G234400	11.6292	9.60833	37.2675	-	GO:0009058;GO:0005737;GO:0009507;GO:0003824;GO:0016212;GO:0008483;GO:003017	BP:biosynthetic process;CC:cytoplasm;CC:chloroplast;MF:catalytic activity;MF:kynurenine-oxoglutarate transaminase activity;MF:transaminase activity;MF:pyridoxal phosphate binding;	K23977	GTK	map00270	Cysteine and methionine metabolism	COG0436	E:Amino acid transport and metabolism	XP_037441744.1	probable N-succinyldiaminopimelate aminotransferase DapC [Triticum dicoccoides]	sp|P9WPZ4|DAPC_MYCTO;	Probable N-succinyldiaminopimelate aminotransferase DapC OS=Mycobacterium tuberculosis;	PF00155.23;PF01053.22;PF00266.21;PF01041.19;PF01212.23	Aminotran_1_2;Cys_Met_Meta_PP;Aminotran_5;DegT_DnrJ_EryC1;Beta_elim_lyase	Aminotransferase class I and II;Cys/Met metabolism PLP-dependent enzyme;Aminotransferase class-V;DegT/DnrJ/EryC1/StrS aminotransferase family;Beta-eliminating lyase
TraesCS5B02G183700	5.05417	8.81583	27.1725	-	GO:0006355;GO:0005634;GO:0003700;GO:004356	BP:regulation of transcription, DNA-templated;CC:nucleus;MF:transcription factor activity, sequence-specific DNA binding;MF:sequence-specific DNA binding;	------	------	------	------	ENOG410YBEV	K:Transcription	KAF7049107.1	hypothetical protein CFC21_057707 [Triticum aestivum]	sp|Q0DFT7|WRK19_ORYSJ;	Transcription factor WRKY19 OS=Oryza sativa subsp. japonica OX=39947 GN=WRKY19 PE=2 SV=1;	PF03106.17	WRKY	WRKY DNA -binding domain
TraesCS5B02G165000	7.79	7.19833	28.94	-	GO:0080028;GO:0010043;GO:0005829;GO:0005634;GO:0005515;GO:003023	BP:nitrile biosynthetic process;BP:response to zinc ion;CC:cytosol;CC:nucleus;MF:protein binding;MF:enzyme regulator activity;	------	------	------	------	ENOG410Y5WM	S:Function unknown	XP_037440696.1	nitrile-specifier protein 5-like [Triticum dicoccoides]	sp|O49326|JAL21_ARATH;	Nitrile-specifier protein 2 OS=Arabidopsis thaliana OX=3702 GN=NSP2 PE=2 SV=1;	PF13415.8;PF13418.8;PF01344.27;PF13964.8;PF13854.8;PF07646.17	Kelch_3;Kelch_4;Kelch_1;Kelch_6;Kelch_5;Kelch_2	Galactose oxidase, central domain;Galactose oxidase, central domain;Kelch motif;Kelch motif;Kelch motif;Kelch motif
TraesCS5B02G152400	4.07	6.11167	18.135	-	GO:000550	MF:calcium ion binding;	K13448	CML	map04626	Plant-pathogen interaction	COG5126;COG5126;COG5126	D:Cell cycle control, cell division, chromosome partitioning;T:Signal transduction mechanisms;Z:Cytoskeleton	KAF7064825.1	hypothetical protein CFC21_071060 [Triticum aestivum]	sp|Q2QYW1|CML25_ORYSJ;	Probable calcium-binding protein CML25/26 OS=Oryza sativa subsp. japonica OX=39947 GN=CML25 PE=3 SV=1;	PF13833.8;PF00036.34;PF13202.8;PF13499.8;PF13405.8	EF-hand_8;EF-hand_1;EF-hand_5;EF-hand_7;EF-hand_6	EF-hand domain pair;EF hand;EF hand;EF-hand domain pair;EF-hand domain
TraesCS5A02G552400	0.458333	0.371667	108.294	-	GO:0030418;GO:003041	BP:nicotianamine biosynthetic process;MF:nicotianamine synthase activity;	K05953	E2.5.1.43	------	------	ENOG4111NF0	E:Amino acid transport and metabolism	KAF7062797.1	hypothetical protein CFC21_069358 [Triticum aestivum]	sp|Q9ZQV7|NAS2_HORVU;	Probable nicotianamine synthase 2 OS=Hordeum vulgare OX=4513 GN=NAS2 PE=2 SV=1;	PF03059.18	NAS	Nicotianamine synthase protein
TraesCS5A02G552200	1.5775	1.04917	69.9883	-	GO:0006468;GO:0016021;GO:0005886;GO:0004672;GO:0030246;GO:0004674;GO:000552	BP:protein phosphorylation;CC:integral component of membrane;CC:plasma membrane;MF:protein kinase activity;MF:carbohydrate binding;MF:protein serine/threonine kinase activity;MF:ATP binding;	------	------	------	------	COG0515	T:Signal transduction mechanisms	KAF7062795.1	hypothetical protein CFC21_069356 [Triticum aestivum]	sp|Q9LSL5|LRK92_ARATH;	L-type lectin-domain containing receptor kinase IX.2 OS=Arabidopsis thaliana OX=3702 GN=LECRK92 PE=1 SV=1;	PF00069.27;PF07714.19;PF01476.22	Pkinase;PK_Tyr_Ser-Thr;LysM	Protein kinase domain;Protein tyrosine and serine/threonine kinase;LysM domain
TraesCS5A02G552000	0.495833	0.4425	61.5333	-	GO:0030418;GO:003041	BP:nicotianamine biosynthetic process;MF:nicotianamine synthase activity;	K05953	E2.5.1.43	------	------	ENOG4111NF0	E:Amino acid transport and metabolism	KAF7062793.1	hypothetical protein CFC21_069354 [Triticum aestivum]	sp|Q9ZQV7|NAS2_HORVU;	Probable nicotianamine synthase 2 OS=Hordeum vulgare OX=4513 GN=NAS2 PE=2 SV=1;	PF03059.18	NAS	Nicotianamine synthase protein
TraesCS5A02G515600	8.90167	9.6975	22.9142	-	GO:0010150;GO:0009751;GO:0002229;GO:0009620;GO:0042742;GO:0046872;GO:0033759;GO:0051213;GO:0034785;GO:001649	BP:leaf senescence;BP:response to salicylic acid;BP:defense response to oomycetes;BP:response to fungus;BP:defense response to bacterium;MF:metal ion binding;MF:flavone synthase activity;MF:dioxygenase activity;MF:salicylate 5-hydroxylase activity;MF:oxidoreductase activity;	K24028	DMR6, DLO	------	------	COG3491	S:Function unknown	XP_037437198.1	flavanone 3-dioxygenase 2-like isoform X1 [Triticum dicoccoides]	sp|Q8W2X5|FL3H2_ORYSJ;	Flavanone 3-dioxygenase 2 OS=Oryza sativa subsp. japonica OX=39947 GN=F3H-2 PE=1 SV=1;	PF03171.22;PF14226.8	2OG-FeII_Oxy;DIOX_N	2OG-F;non-haem dioxygenase in morphine synthesis N-terminal
TraesCS5A02G491200	4.72583	19.4225	234.569	-	------	------	------	------	------	------	------	------	KAF7062080.1	hypothetical protein CFC21_068721 [Triticum aestivum]	------	------	------	------	------
TraesCS5A02G328600	5.23167	5.68583	9.57583	-	GO:001602	CC:integral component of membrane;	------	------	------	------	ENOG410Y7MY	S:Function unknown	XP_037435609.1	protein NUCLEAR FUSION DEFECTIVE 4-like [Triticum dicoccoides]	sp|F4I9E1|NFD4_ARATH;	Protein NUCLEAR FUSION DEFECTIVE 4 OS=Arabidopsis thaliana OX=3702 GN=NFD4 PE=3 SV=1;	PF06813.15	Nodulin-like	Nodulin-like
TraesCS5A02G236100	12.4608	10.2183	38.2217	-	GO:0009058;GO:0005737;GO:0009507;GO:0003824;GO:0016829;GO:0016212;GO:0008483;GO:003017	BP:biosynthetic process;CC:cytoplasm;CC:chloroplast;MF:catalytic activity;MF:lyase activity;MF:kynurenine-oxoglutarate transaminase activity;MF:transaminase activity;MF:pyridoxal phosphate binding;	K23977	GTK	map00270	Cysteine and methionine metabolism	COG0436	E:Amino acid transport and metabolism	XP_037434674.1	probable N-succinyldiaminopimelate aminotransferase DapC [Triticum dicoccoides]	sp|P9WPZ4|DAPC_MYCTO;	Probable N-succinyldiaminopimelate aminotransferase DapC OS=Mycobacterium tuberculosis;	PF00155.23;PF01053.22;PF00266.21;PF01041.19;PF01212.23	Aminotran_1_2;Cys_Met_Meta_PP;Aminotran_5;DegT_DnrJ_EryC1;Beta_elim_lyase	Aminotransferase class I and II;Cys/Met metabolism PLP-dependent enzyme;Aminotransferase class-V;DegT/DnrJ/EryC1/StrS aminotransferase family;Beta-eliminating lyase
TraesCS5A02G168200	3.69667	4.03333	17.1642	-	GO:0080028;GO:0010043;GO:0005829;GO:0005634;GO:0005515;GO:003023	BP:nitrile biosynthetic process;BP:response to zinc ion;CC:cytosol;CC:nucleus;MF:protein binding;MF:enzyme regulator activity;	------	------	------	------	ENOG410Y5WM	S:Function unknown	XP_037433940.1	nitrile-specifier protein 5-like [Triticum dicoccoides]	sp|O49326|JAL21_ARATH;	Nitrile-specifier protein 2 OS=Arabidopsis thaliana OX=3702 GN=NSP2 PE=2 SV=1;	PF13415.8;PF13418.8;PF01344.27;PF13964.8;PF13854.8;PF07646.17	Kelch_3;Kelch_4;Kelch_1;Kelch_6;Kelch_5;Kelch_2	Galactose oxidase, central domain;Galactose oxidase, central domain;Kelch motif;Kelch motif;Kelch motif;Kelch motif
TraesCS4D02G317400	9.08917	18.9517	156.995	-	------	------	------	------	------	------	------	------	KAF7039757.1	hypothetical protein CFC21_049706 [Triticum aestivum]	------	------	------	------	------
TraesCS4D02G317300	3.89583	13.4458	119.692	-	------	------	------	------	------	------	------	------	KAF7055704.1	hypothetical protein CFC21_063202 [Triticum aestivum]	------	------	------	------	------
TraesCS4D02G232200	8.3625	5.16917	48.1033	-	GO:1990641;GO:0034224;GO:0019290;GO:0005829;GO:0004032;GO:0016616;GO:0033707;GO:0047834;GO:001649	BP:response to iron ion starvation;BP:cellular response to zinc ion starvation;BP:siderophore biosynthetic process;CC:cytosol;MF:aldito;MF:oxidoreductase activity, acting on the CH-OH group of donors, NAD or NADP as acceptor;MF:3''-deamino-3''-oxonicotianamine reductase activity;MF:D-threo-aldose 1-dehydrogenase activity;MF:oxidoreductase activity;	K22374	DMAS1	------	------	COG0656	S:Function unknown	XP_020198740.1	deoxymugineic acid synthase 1-D [Aegilops tauschii subsp. strangulata]	sp|A0A1X9QHJ0|DMS1D_WHEAT;	Deoxymugineic acid synthase 1-D OS=Triticum aestivum OX=4565 GN=DMAS1-D PE=2 SV=1;	PF00248.23	Aldo_ket_red	Aldo/keto reductase family
TraesCS4D02G184900	3.85917	2.67833	205.317	Nicotianamine synthase [Source:UniProtKB/TrEMBL;Acc:W5EKQ9]	GO:0030418;GO:003041	BP:nicotianamine biosynthetic process;MF:nicotianamine synthase activity;	K05953	E2.5.1.43	------	------	ENOG4111NF0	E:Amino acid transport and metabolism	AND77085.1	nicotianamine synthase [Triticum aestivum]	sp|Q9ZQV7|NAS2_HORVU;	Probable nicotianamine synthase 2 OS=Hordeum vulgare OX=4513 GN=NAS2 PE=2 SV=1;	PF03059.18	NAS	Nicotianamine synthase protein
TraesCS4D02G104900	9.77667	9.59417	37.0258	Methylthioribose-1-phosphate isomerase [Source:UniProtKB/TrEMBL;Acc:A0A1D5Y5L9]	GO:0071281;GO:0019509;GO:0044237;GO:0071732;GO:0044249;GO:0071369;GO:0019284;GO:0005737;GO:0005634;GO:0009506;GO:004652	BP:cellular response to iron ion;BP:L-methionine biosynthetic process from methylthioadenosine;BP:cellular metabolic process;BP:cellular response to nitric oxide;BP:cellular biosynthetic process;BP:cellular response to ethylene stimulus;BP:L-methionine biosynthetic process from S-adenosylmethionine;CC:cytoplasm;CC:nucleus;CC:plasmodesma;MF:S-methyl-5-thioribose-1-phosphate isomerase activity;	K08963	mtnA	map00270	Cysteine and methionine metabolism	COG0182	J:Translation, ribosomal structure and biogenesis	KAF7048225.1	hypothetical protein CFC21_057019 [Triticum aestivum]	sp|Q9AYT7|MTNA_HORVU;	Methylthioribose-1-phosphate isomerase OS=Hordeum vulgare OX=4513 GN=IDI2 PE=2 SV=1;	PF01008.19	IF-2B	Initiation factor 2 subunit family
TraesCS4D02G098600	6.8175	6.62917	15.7258	-	GO:0016021;GO:0005576;GO:000419	CC:integral component of membrane;CC:extracellular region;MF:aspartic-type endopeptidase activity;	------	------	------	------	ENOG410XNV7	O:Posttranslational modification, protein turnover, chaperones	XP_020166557.1	aspartic proteinase nepenthesin-2 [Aegilops tauschii subsp. strangulata]	sp|Q766C2|NEP2_NEPGR;	Aspartic proteinase nepenthesin-2 OS=Nepenthes gracilis OX=150966 GN=nep2 PE=1 SV=1;	PF14543.8;PF14541.8	TAXi_N;TAXi_C	Xylanase inhibitor N-terminal;Xylanase inhibitor C-terminal
TraesCS4B02G392100	3.54333	3.80583	10.925	-	GO:001602	CC:integral component of membrane;	------	------	------	------	ENOG41106HX;ENOG410YEMY	S:Function unknown;	KAF7051678.1	hypothetical protein CFC21_059893 [Triticum aestivum]	sp|Q9SD53|Y3720_ARATH;	UPF0481 protein At3g47200 OS=Arabidopsis thaliana OX=3702 GN=At3g47200 PE=2 SV=1;	PF03140.17	DUF247	Plant protein of unknown function
TraesCS4B02G320900	2.13	7.2525	68	-	------	------	------	------	------	------	------	------	KAF7050862.1	hypothetical protein CFC21_059163 [Triticum aestivum]	------	------	------	------	------
TraesCS4B02G242700	3.0675	6.12333	27.4742	Homocysteine S-methyltransferase 1 [Source:Projected from Arabidopsis thaliana (AT3G25900) UniProtKB/Swiss-Prot;Acc:Q9SDL7]	GO:0032259;GO:0033528;GO:0009086;GO:0005737;GO:0008898;GO:0008270;GO:004715	BP:methylation;BP:S-methylmethionine cycle;BP:methionine biosynthetic process;CC:cytoplasm;MF:S-adenosylmethionine-homocysteine S-methyltransferase activity;MF:zinc ion binding;MF:betaine-homocysteine S-methyltransferase activity;	K00547	mmuM, BHMT2	map00270	Cysteine and methionine metabolism	COG2040	E:Amino acid transport and metabolism	XP_037425781.1	homocysteine S-methyltransferase 1 [Triticum dicoccoides]	sp|Q9FUN0|HMT1_MAIZE;	Homocysteine S-methyltransferase 1 OS=Zea mays OX=4577 GN=HMT-1 PE=2 SV=1;	PF02574.18	S-methyl_trans	Homocysteine S-methyltransferase
TraesCS4B02G183900	0.895	0.384167	160.192	Nicotianamine synthase [Source:UniProtKB/TrEMBL;Acc:A0A172Q4G1]	GO:0030418;GO:003041	BP:nicotianamine biosynthetic process;MF:nicotianamine synthase activity;	K05953	E2.5.1.43	------	------	ENOG4111NF0	E:Amino acid transport and metabolism	XP_037430620.1	probable nicotianamine synthase 6 [Triticum dicoccoides]	sp|Q9ZQV7|NAS2_HORVU;	Probable nicotianamine synthase 2 OS=Hordeum vulgare OX=4513 GN=NAS2 PE=2 SV=1;	PF03059.18	NAS	Nicotianamine synthase protein
TraesCS4B02G131400	1.95167	1.6975	14.985	-	GO:0055085;GO:0016021;GO:002285	BP:transmembrane transport;CC:integral component of membrane;MF:transmembrane transporter activity;	------	------	------	------	ENOG410XSE0	G:Carbohydrate transport and metabolism	VAI04164.1	unnamed protein product [Triticum turgidum subsp. durum]	sp|Q94BZ1|ZIFL1_ARATH;	Protein ZINC INDUCED FACILITATOR-LIKE 1 OS=Arabidopsis thaliana OX=3702 GN=ZIFL1 PE=2 SV=1;	PF07690.18;PF00083.26;PF06609.15	MFS_1;Sugar_tr;TRI12	Major Facilitator Superfamily;Sugar;Fungal trichothecene efflux pump
TraesCS4B02G107800	8.92917	6.53833	23.6058	Methylthioribose-1-phosphate isomerase [Source:UniProtKB/TrEMBL;Acc:A0A341UA67]	GO:0019509;GO:0044237;GO:0044249;GO:0019284;GO:0005737;GO:0005634;GO:0009506;GO:004652	BP:L-methionine biosynthetic process from methylthioadenosine;BP:cellular metabolic process;BP:cellular biosynthetic process;BP:L-methionine biosynthetic process from S-adenosylmethionine;CC:cytoplasm;CC:nucleus;CC:plasmodesma;MF:S-methyl-5-thioribose-1-phosphate isomerase activity;	K08963	mtnA	map00270	Cysteine and methionine metabolism	COG0182	J:Translation, ribosomal structure and biogenesis	KAF7048225.1	hypothetical protein CFC21_057019 [Triticum aestivum]	sp|Q9AYT7|MTNA_HORVU;	Methylthioribose-1-phosphate isomerase OS=Hordeum vulgare OX=4513 GN=IDI2 PE=2 SV=1;	PF01008.19	IF-2B	Initiation factor 2 subunit family
TraesCS4B02G067500	2.705	5.18917	17.34	-	------	------	------	------	------	------	ENOG410YTJH	S:Function unknown	XP_037429213.1	uncharacterized protein LOC119294999 [Triticum dicoccoides]	------	------	------	------	------
TraesCS4A02G074800	14.6658	9.34833	82.7867	Deoxymugineic acid synthase 1-A [Source:UniProtKB/Swiss-Prot;Acc:W5DYE3]	GO:1990641;GO:0034224;GO:0019290;GO:0005829;GO:0004032;GO:0016616;GO:0033707;GO:0047834;GO:001649	BP:response to iron ion starvation;BP:cellular response to zinc ion starvation;BP:siderophore biosynthetic process;CC:cytosol;MF:aldito;MF:oxidoreductase activity, acting on the CH-OH group of donors, NAD or NADP as acceptor;MF:3''-deamino-3''-oxonicotianamine reductase activity;MF:D-threo-aldose 1-dehydrogenase activity;MF:oxidoreductase activity;	K22374	DMAS1	------	------	COG0656	S:Function unknown	XP_037420157.1	deoxymugineic acid synthase 1-A [Triticum dicoccoides]	sp|W5DYE3|DMS1A_WHEAT;	Deoxymugineic acid synthase 1-A OS=Triticum aestivum OX=4565 GN=DMAS1-A PE=1 SV=1;	PF00248.23	Aldo_ket_red	Aldo/keto reductase family
TraesCS3D02G375900	6.81417	5.23	21.5242	-	GO:0055085;GO:0016021;GO:0016020;GO:002285	BP:transmembrane transport;CC:integral component of membrane;CC:membrane;MF:transmembrane transporter activity;	K14638	SLC15A3_4, PHT	------	------	COG3104	E:Amino acid transport and metabolism	XP_020158545.1	protein NRT1/ PTR FAMILY 5.10 isoform X1 [Aegilops tauschii subsp. strangulata]	sp|Q0WP01|PTR9_ARATH;	Protein NRT1/ PTR FAMILY 5.10 OS=Arabidopsis thaliana OX=3702 GN=NPF5.10 PE=2 SV=1;	PF00854.23;PF07690.18	PTR2;MFS_1	POT family;Major Facilitator Superfamily
TraesCS3D02G246600	5.10167	5.3975	8.64833	-	GO:0008270;GO:000367	MF:zinc ion binding;MF:DNA binding;	K24687	ZFAND5_6	------	------	ENOG4111UWC	S:Function unknown	XP_020194527.1	zinc finger A20 and AN1 domain-containing stress-associated protein 2 [Aegilops tauschii subsp. strangulata]	sp|Q942F8|SAP2_ORYSJ;	Zinc finger A20 and AN1 domain-containing stress-associated protein 2 OS=Oryza sativa subsp. japonica OX=39947 GN=SAP2 PE=2 SV=1;	PF01754.18;PF01428.18	zf-A20;zf-AN1	A20-like zinc finger;AN1-like Zinc finger
TraesCS3B02G550200	0.275	1.70833	31.3408	-	GO:0006357;GO:0003700;GO:0046983;GO:000367	BP:regulation of transcription from RNA polymerase II promoter;MF:transcription factor activity, sequence-specific DNA binding;MF:protein dimerization activity;MF:DNA binding;	------	------	------	------	ENOG410YP85;ENOG410ZMQF	K:Transcription;	XP_037415896.1	protein IRON-RELATED TRANSCRIPTION FACTOR 2-like [Triticum dicoccoides]	sp|A2WZ60|IRO2_ORYSI;	Protein IRON-RELATED TRANSCRIPTION FACTOR 2 OS=Oryza sativa subsp. indica OX=39946 GN=IRO2 PE=3 SV=1;	PF00010.28	HLH	Helix-loop-helix DNA-binding domain
TraesCS3B02G414800	6.39083	4.655	22.2575	-	GO:0055085;GO:0016021;GO:0016020;GO:002285	BP:transmembrane transport;CC:integral component of membrane;CC:membrane;MF:transmembrane transporter activity;	K14638	SLC15A3_4, PHT	------	------	COG3104	E:Amino acid transport and metabolism	KAF7031809.1	hypothetical protein CFC21_043078 [Triticum aestivum]	sp|Q0WP01|PTR9_ARATH;	Protein NRT1/ PTR FAMILY 5.10 OS=Arabidopsis thaliana OX=3702 GN=NPF5.10 PE=2 SV=1;	PF00854.23;PF07690.18	PTR2;MFS_1	POT family;Major Facilitator Superfamily
TraesCS3B02G068500	0.298333	0.2475	98.2933	-	GO:0030418;GO:003041	BP:nicotianamine biosynthetic process;MF:nicotianamine synthase activity;	K05953	E2.5.1.43	------	------	ENOG4111NF0	E:Amino acid transport and metabolism	AND77082.1	nicotianamine synthase [Triticum aestivum]	sp|Q9ZQV7|NAS2_HORVU;	Probable nicotianamine synthase 2 OS=Hordeum vulgare OX=4513 GN=NAS2 PE=2 SV=1;	PF03059.18	NAS	Nicotianamine synthase protein
TraesCS3B02G064900	3.70917	2.46083	6.44333	-	GO:0006355;GO:0005634;GO:0003700;GO:000367	BP:regulation of transcription, DNA-templated;CC:nucleus;MF:transcription factor activity, sequence-specific DNA binding;MF:DNA binding;	K09287	RAV	------	------	ENOG4110AU5	K:Transcription	KAF7027474.1	hypothetical protein CFC21_039514 [Triticum aestivum]	sp|Q9AWS0|Y1410_ORYSJ;	AP2/ERF and B3 domain-containing protein Os01g0141000 OS=Oryza sativa subsp. japonica OX=39947 GN=Os01g0141000 PE=2 SV=1;	PF02362.23;PF00847.22	B3;AP2	B3 DNA binding domain;AP2 domain
TraesCS3A02G382100	5.67417	5.70583	24.5725	-	GO:0055085;GO:0016021;GO:0016020;GO:002285	BP:transmembrane transport;CC:integral component of membrane;CC:membrane;MF:transmembrane transporter activity;	K14638	SLC15A3_4, PHT	------	------	COG3104	E:Amino acid transport and metabolism	KAF7024835.1	hypothetical protein CFC21_037117 [Triticum aestivum]	sp|Q0WP01|PTR9_ARATH;	Protein NRT1/ PTR FAMILY 5.10 OS=Arabidopsis thaliana OX=3702 GN=NPF5.10 PE=2 SV=1;	PF00854.23;PF07690.18	PTR2;MFS_1	POT family;Major Facilitator Superfamily
TraesCS3A02G262000	6.33417	6.4325	13.5683	-	GO:0016021;GO:003024	CC:integral component of membrane;MF:polysaccharide binding;	------	------	------	------	COG0515	T:Signal transduction mechanisms	KAF7023383.1	hypothetical protein CFC21_035908 [Triticum aestivum]	sp|F4HQ17|LRL14_ARATH;	LEAF RUST 10 DISEASE-RESISTANCE LOCUS RECEPTOR-LIKE PROTEIN KINASE-like 1.4 OS=Arabidopsis thaliana OX=3702 GN=LRK10L-1.4 PE=2 SV=2;	PF13947.8;PF14380.8	GUB_WAK_bind;WAK_assoc	Wall-associated receptor kinase galacturonan-binding;Wall-associated receptor kinase C-terminal
TraesCS3A02G054000	5.3825	3.825	9.5125	-	GO:0006355;GO:0006351;GO:0005634;GO:0003700;GO:000367	BP:regulation of transcription, DNA-templated;BP:transcription, DNA-templated;CC:nucleus;MF:transcription factor activity, sequence-specific DNA binding;MF:DNA binding;	K09287	RAV	------	------	ENOG4110AU5	K:Transcription	XP_037404024.1	AP2/ERF and B3 domain-containing protein Os01g0141000-like [Triticum dicoccoides]	sp|Q9AWS0|Y1410_ORYSJ;	AP2/ERF and B3 domain-containing protein Os01g0141000 OS=Oryza sativa subsp. japonica OX=39947 GN=Os01g0141000 PE=2 SV=1;	PF02362.23;PF00847.22	B3;AP2	B3 DNA binding domain;AP2 domain
TraesCS2D02G545000	22.9842	14.2992	86.1417	-	GO:0016310;GO:0009086;GO:0019509;GO:0046522;GO:000552	BP:phosphorylation;BP:methionine biosynthetic process;BP:L-methionine biosynthetic process from methylthioadenosine;MF:S-methyl-5-thioribose kinase activity;MF:ATP binding;	K00899	mtnK	map00270	Cysteine and methionine metabolism	COG4857	S:Function unknown	XP_040256007.1	methylthioribose kinase 1 [Aegilops tauschii subsp. strangulata]	sp|Q7XR61|MTK1_ORYSJ;	Methylthioribose kinase 1 OS=Oryza sativa subsp. japonica OX=39947 GN=MTK1 PE=2 SV=1;	PF01636.25;PF01633.22	APH;Choline_kinase	Phosphotransferase enzyme family;Choline/ethanolamine kinase
TraesCS2D02G418300	1.89333	6.5925	171.1	-	------	------	------	------	------	------	------	------	EMS61590.1	hypothetical protein TRIUR3_14546 [Triticum urartu]	------	------	------	------	------
TraesCS2D02G387600	1.98583	1.77	9.315	-	GO:0055085;GO:0035672;GO:0016021;GO:0016020;GO:003567	BP:transmembrane transport;BP:oligopeptide transmembrane transport;CC:integral component of membrane;CC:membrane;MF:oligopeptide transmembrane transporter activity;	------	------	------	------	COG1297	S:Function unknown	KAF7017593.1	hypothetical protein CFC21_031005 [Triticum aestivum]	sp|Q7XUJ2|YSL9_ORYSJ;	Probable metal-nicotianamine transporter YSL9 OS=Oryza sativa subsp. japonica OX=39947 GN=YSL9 PE=2 SV=2;	PF03169.17	OPT	OPT oligopeptide transporter protein
TraesCS2D02G280100	6.03	7.44333	20.855	Transcription factor FER-LIKE IRON DEFICIENCY-INDUCED TRANSCRIPTION FACTOR [Source:Projected from Arabidopsis thaliana (AT2G28160) UniProtKB/Swiss-Prot;Acc:Q0V7X4]	GO:0006355;GO:0005634;GO:0003700;GO:0046983;GO:004356	BP:regulation of transcription, DNA-templated;CC:nucleus;MF:transcription factor activity, sequence-specific DNA binding;MF:protein dimerization activity;MF:sequence-specific DNA binding;	------	------	------	------	ENOG410YQ9Q	K:Transcription	XP_020152884.1	transcription factor BHLH156 [Aegilops tauschii subsp. strangulata]	sp|A0A0N7KIY3|BH156_ORYSJ;	Transcription factor BHLH156 OS=Oryza sativa subsp. japonica OX=39947 GN=BHLH156 PE=1 SV=1;	PF00010.28	HLH	Helix-loop-helix DNA-binding domain
TraesCS2D02G271700	17.5592	17.9492	76.895	-	GO:0009052;GO:000475	BP:pentose-phosphate shunt, non-oxidative branch;MF:ribose-5-phosphate isomerase activity;	K01807	rpiA	map00030;map00710	Pentose phosphate pathway;Carbon fixation in photosynthetic organisms	COG0120	G:Carbohydrate transport and metabolism	XP_020176405.1	probable ribose-5-phosphate isomerase 2 [Aegilops tauschii subsp. strangulata]	sp|Q9ZU38|RPI2_ARATH;	Probable ribose-5-phosphate isomerase 2 OS=Arabidopsis thaliana OX=3702 GN=RPI2 PE=1 SV=1;	PF06026.16;PF00455.24	Rib_5-P_isom_A;DeoRC	Ribose 5-phosphate isomerase A;DeoR C terminal sensor domain
TraesCS2D02G049200	0.6075	0.380833	193.448	-	GO:0030418;GO:003041	BP:nicotianamine biosynthetic process;MF:nicotianamine synthase activity;	K05953	E2.5.1.43	------	------	ENOG4111NF0	E:Amino acid transport and metabolism	XP_020147984.1	probable nicotianamine synthase 2 [Aegilops tauschii subsp. strangulata]	sp|Q9ZQV7|NAS2_HORVU;	Probable nicotianamine synthase 2 OS=Hordeum vulgare OX=4513 GN=NAS2 PE=2 SV=1;	PF03059.18	NAS	Nicotianamine synthase protein
TraesCS2B02G574100	7.72417	7.4125	31.26	-	GO:0009086;GO:0019509;GO:0046522;GO:000552	BP:methionine biosynthetic process;BP:L-methionine biosynthetic process from methylthioadenosine;MF:S-methyl-5-thioribose kinase activity;MF:ATP binding;	K00899	mtnK	map00270	Cysteine and methionine metabolism	COG4857	S:Function unknown	KAF7012099.1	hypothetical protein CFC21_026333 [Triticum aestivum]	sp|Q7XR61|MTK1_ORYSJ;	Methylthioribose kinase 1 OS=Oryza sativa subsp. japonica OX=39947 GN=MTK1 PE=2 SV=1;	PF01636.25;PF01633.22	APH;Choline_kinase	Phosphotransferase enzyme family;Choline/ethanolamine kinase
TraesCS2B02G103200	4.26083	1.30333	13.285	-	GO:001602	CC:integral component of membrane;	------	------	------	------	ENOG41116DC	S:Function unknown	KAF7006503.1	hypothetical protein CFC21_021540 [Triticum aestivum]	------	------	PF04578.15	DUF594	Protein of unknown function, DUF594
TraesCS2B02G103000	8.07917	2.53083	19.5733	-	GO:001602	CC:integral component of membrane;	------	------	------	------	ENOG41116DC	S:Function unknown	KAF7006498.1	hypothetical protein CFC21_021535 [Triticum aestivum]	------	------	PF13968.8;PF04578.15	DUF4220;DUF594	Domain of unknown function;Protein of unknown function, DUF594
TraesCS2B02G095900	1.15083	1.86917	15.9367	Putative transcription factor bHLH [Source:UniProtKB/TrEMBL;Acc:W5BLT2]	GO:004698	MF:protein dimerization activity;	------	------	------	------	ENOG410YN73	K:Transcription	AJD09164.1	putative transcription factor bHLH [Triticum aestivum]	sp|Q10KL8|IRO3_ORYSJ;	Protein IRON-RELATED TRANSCRIPTION FACTOR 3 OS=Oryza sativa subsp. japonica OX=39947 GN=IRO3 PE=2 SV=1;	PF00010.28	HLH	Helix-loop-helix DNA-binding domain
TraesCS2B02G060800	0.34	0.171667	95.0425	Nicotianamine synthase [Source:UniProtKB/TrEMBL;Acc:W5BMA4]	GO:0030418;GO:003041	BP:nicotianamine biosynthetic process;MF:nicotianamine synthase activity;	K05953	E2.5.1.43	------	------	ENOG4111NF0	E:Amino acid transport and metabolism	AND77078.1	nicotianamine synthase [Triticum aestivum]	sp|Q9ZQV7|NAS2_HORVU;	Probable nicotianamine synthase 2 OS=Hordeum vulgare OX=4513 GN=NAS2 PE=2 SV=1;	PF03059.18;PF13649.8	NAS;Methyltransf_25	Nicotianamine synthase protein;Methyltransferase domain
TraesCS2B02G035400	3.4275	3.77167	8.22917	-	GO:0006468;GO:0045927;GO:0004674;GO:0005524;GO:000467	BP:protein phosphorylation;BP:positive regulation of growth;MF:protein serine/threonine kinase activity;MF:ATP binding;MF:protein kinase activity;	K17302	COPB2, SEC27	------	------	ENOG410XNNY	S:Function unknown	KAF7005739.1	hypothetical protein CFC21_020842 [Triticum aestivum]	sp|Q9SXB5|Y1135_ARATH;	G-type lectin S-receptor-like serine/threonine-protein kinase At1g11303 OS=Arabidopsis thaliana OX=3702 GN=At1g11303 PE=3 SV=1;	PF00069.27;PF07714.19;PF14299.8;PF03109.18	Pkinase;PK_Tyr_Ser-Thr;PP2;ABC1	Protein kinase domain;Protein tyrosine and serine/threonine kinase;Phloem protein 2;ABC1 atypical kinase-like domain
TraesCS2A02G543900	12.3508	8.7825	34.0375	-	GO:0009086;GO:0019509;GO:0046522;GO:000552	BP:methionine biosynthetic process;BP:L-methionine biosynthetic process from methylthioadenosine;MF:S-methyl-5-thioribose kinase activity;MF:ATP binding;	K00899	mtnK	map00270	Cysteine and methionine metabolism	COG4857	S:Function unknown	KAF7004719.1	hypothetical protein CFC21_019915 [Triticum aestivum]	sp|Q7XR61|MTK1_ORYSJ;	Methylthioribose kinase 1 OS=Oryza sativa subsp. japonica OX=39947 GN=MTK1 PE=2 SV=1;	PF01636.25;PF01633.22	APH;Choline_kinase	Phosphotransferase enzyme family;Choline/ethanolamine kinase
TraesCS2A02G281200	5.60583	6.30667	16.785	Transcription factor FER-LIKE IRON DEFICIENCY-INDUCED TRANSCRIPTION FACTOR [Source:Projected from Arabidopsis thaliana (AT2G28160) UniProtKB/Swiss-Prot;Acc:Q0V7X4]	GO:0006355;GO:0005634;GO:0003700;GO:0043565;GO:004698	BP:regulation of transcription, DNA-templated;CC:nucleus;MF:transcription factor activity, sequence-specific DNA binding;MF:sequence-specific DNA binding;MF:protein dimerization activity;	------	------	------	------	ENOG410YQ9Q	K:Transcription	XP_037477609.1	transcription factor BHLH156-like [Triticum dicoccoides]	sp|A0A0N7KIY3|BH156_ORYSJ;	Transcription factor BHLH156 OS=Oryza sativa subsp. japonica OX=39947 GN=BHLH156 PE=1 SV=1;	PF00010.28	HLH	Helix-loop-helix DNA-binding domain
TraesCS2A02G049900	0.361667	0.175833	124.312	Nicotianamine synthase [Source:UniProtKB/TrEMBL;Acc:W5B5U2]	GO:0030418;GO:003041	BP:nicotianamine biosynthetic process;MF:nicotianamine synthase activity;	K05953	E2.5.1.43	------	------	ENOG4111NF0	E:Amino acid transport and metabolism	VAH25157.1	unnamed protein product [Triticum turgidum subsp. durum]	sp|Q9ZQV7|NAS2_HORVU;	Probable nicotianamine synthase 2 OS=Hordeum vulgare OX=4513 GN=NAS2 PE=2 SV=1;	PF03059.18	NAS	Nicotianamine synthase protein
TraesCS2A02G033500	4.32083	4.235	7.965	Nicotianamine synthase [Source:UniProtKB/TrEMBL;Acc:A0A172Q4G4]	GO:0030418;GO:003041	BP:nicotianamine biosynthetic process;MF:nicotianamine synthase activity;	K05953	E2.5.1.43	------	------	ENOG4111NF0	E:Amino acid transport and metabolism	AND77076.1	nicotianamine synthase [Triticum aestivum]	sp|Q9ZQV4|NAS5_HORVU;	Nicotianamine synthase-like 5 protein OS=Hordeum vulgare OX=4513 GN=NAS5 PE=1 SV=1;	PF03059.18	NAS	Nicotianamine synthase protein
TraesCS1D02G430800	3.95583	4.65417	7.28	-	GO:0006468;GO:0016021;GO:0008270;GO:0003676;GO:0004672;GO:000552	BP:protein phosphorylation;CC:integral component of membrane;MF:zinc ion binding;MF:nucleic acid binding;MF:protein kinase activity;MF:ATP binding;	------	------	------	------	COG0515	T:Signal transduction mechanisms	KAF6997862.1	hypothetical protein CFC21_014034 [Triticum aestivum]	sp|Q0D5R3|CRK6_ORYSJ;	Cysteine-rich receptor-like protein kinase 6 OS=Oryza sativa subsp. japonica OX=39947 GN=CRK6 PE=1 SV=1;	PF00069.27;PF07714.19;PF01657.19	Pkinase;PK_Tyr_Ser-Thr;Stress-antifung	Protein kinase domain;Protein tyrosine and serine/threonine kinase;Salt stress response/antifungal
TraesCS1D02G350200	3.73167	3.97917	7.15917	Glycosyltransferase [Source:UniProtKB/TrEMBL;Acc:A0A1D5SS60]	GO:0016758;GO:000819	MF:transferase activity, transferring hexosyl groups;MF:UDP-glycosyltransferase activity;	------	------	------	------	COG1819	S:Function unknown	KAF6996980.1	hypothetical protein CFC21_013247 [Triticum aestivum]	sp|Q4R1I9|ANGLT_ROSHC;	Anthocyanidin 5,3-O-glucosyltransferase OS=Rosa hybrid cultivar OX=128735 GN=RhGT1 PE=2 SV=1;	PF00201.20	UDPGT	UDP-glucoronosyl and UDP-glucosyl transferase
TraesCS1D02G289800	3.95083	5.11083	15.64	Nicotianamine aminotransferase 2 [Source:UniProtKB/TrEMBL;Acc:A0A1D5SWF7]	GO:0006520;GO:0009058;GO:0033855;GO:0008483;GO:0016740;GO:0003824;GO:003017	BP:cellular amino acid metabolic process;BP:biosynthetic process;MF:nicotianamine aminotransferase activity;MF:transaminase activity;MF:transferase activity;MF:catalytic activity;MF:pyridoxal phosphate binding;	K14271	NAAT	------	------	COG0436	E:Amino acid transport and metabolism	ARQ30113.1	nicotianamine aminotransferase 2 [Triticum aestivum]	sp|Q9ST02|NAATA_HORVU;	Nicotianamine aminotransferase A OS=Hordeum vulgare OX=4513 GN=naat-A PE=1 SV=2;	PF00155.23;PF01212.23;PF00266.21	Aminotran_1_2;Beta_elim_lyase;Aminotran_5	Aminotransferase class I and II;Beta-eliminating lyase;Aminotransferase class-V
TraesCS1D02G284800	2.84	1.83917	7.85917	-	GO:0016021;GO:0016020;GO:0050664;GO:0005509;GO:0004601;GO:001649	CC:integral component of membrane;CC:membrane;MF:oxidoreductase activity, acting on NA;MF:calcium ion binding;MF:peroxidase activity;MF:oxidoreductase activity;	K13447	RBOH	map04016;map04626	MAPK signaling pathway - plant;Plant-pathogen interaction	ENOG410XNZY	U:Intracellular trafficking, secretion, and vesicular transport	KAF6996208.1	hypothetical protein CFC21_012576 [Triticum aestivum]	sp|Q948T9|RBOHB_SOLTU;	Respiratory burst oxidase homolog protein B OS=Solanum tuberosum OX=4113 GN=RBOHB PE=1 SV=1;	PF08030.14;PF08414.12;PF08022.14;PF01794.21;PF13499.8;PF00036.34;PF13405.8	NAD_binding_6;NADPH_Ox;FAD_binding_8;Ferric_reduct;EF-hand_7;EF-hand_1;EF-hand_6	Ferric reductase NAD binding domain;Respiratory burst NADPH oxidase;FAD-binding domain;Ferric reductase like transmembrane component;EF-hand domain pair;EF hand;EF-hand domain
TraesCS1D02G227100	0.418333	2.605	121.91	-	GO:004687	MF:metal ion binding;	------	------	------	------	ENOG410Z616	S:Function unknown	XP_020173251.1	metallothionein-like protein 1 [Aegilops tauschii subsp. strangulata]	sp|P26571|MT1_HORVU;	Metallothionein-like protein 1 OS=Hordeum vulgare OX=4513 GN=IDS-1 PE=3 SV=1;	PF01439.20;PF02068.18	Metallothio_2;Metallothio_PEC	Metallothionein;Plant PEC family metallothionein
TraesCS1B02G410400	1.6825	2.6475	9.5	CASP-like protein [Source:UniProtKB/TrEMBL;Acc:A0A1D5SER1]	GO:0016021;GO:000588	CC:integral component of membrane;CC:plasma membrane;	------	------	------	------	ENOG41103Z0	S:Function unknown	KAF6991780.1	hypothetical protein CFC21_008829 [Triticum aestivum]	sp|Q2R0D1|CSPLK_ORYSJ;	CASP-like protein 1U2 OS=Oryza sativa subsp. japonica OX=39947 GN=Os11g0649700 PE=2 SV=1;	PF04535.14	DUF588	Domain of unknown function
TraesCS1B02G300500	0.2	0.750833	69.2092	-	GO:0006520;GO:0009058;GO:0033855;GO:0008483;GO:0016740;GO:0003824;GO:003017	BP:cellular amino acid metabolic process;BP:biosynthetic process;MF:nicotianamine aminotransferase activity;MF:transaminase activity;MF:transferase activity;MF:catalytic activity;MF:pyridoxal phosphate binding;	K14271	NAAT	------	------	COG0436	E:Amino acid transport and metabolism	KAF6990561.1	hypothetical protein CFC21_007731 [Triticum aestivum]	sp|Q9ST02|NAATA_HORVU;	Nicotianamine aminotransferase A OS=Hordeum vulgare OX=4513 GN=naat-A PE=1 SV=2;	PF00155.23;PF01212.23;PF00266.21	Aminotran_1_2;Beta_elim_lyase;Aminotran_5	Aminotransferase class I and II;Beta-eliminating lyase;Aminotransferase class-V
TraesCS1A02G356300	2.89667	2.41083	5.53583	Serine/threonine-protein kinase [Source:UniProtKB/TrEMBL;Acc:A0A1D5RTA9]	GO:0006468;GO:0048544;GO:0016021;GO:0004674;GO:0106311;GO:0004672;GO:0106310;GO:000552	BP:protein phosphorylation;BP:recognition of pollen;CC:integral component of membrane;MF:protein serine/threonine kinase activity;MF:old GO;MF:protein kinase activity;MF:old GO;MF:ATP binding;	------	------	------	------	COG0515	T:Signal transduction mechanisms	KAF6985835.1	hypothetical protein CFC21_003653 [Triticum aestivum]	sp|P17801|KPRO_MAIZE;	Putative receptor protein kinase ZmPK1 OS=Zea mays OX=4577 GN=PK1 PE=2 SV=2;	PF00069.27;PF07714.19;PF01453.26;PF00954.22;PF08276.13;PF12260.10	Pkinase;PK_Tyr_Ser-Thr;B_lectin;S_locus_glycop;PAN_2;PIP49_C	Protein kinase domain;Protein tyrosine and serine/threonine kinase;D-mannose binding lectin;S-locus glycoprotein domain;PAN-like domain;Protein-kinase domain of FAM69
TraesCS1A02G291200	4.84667	3.285	7.80333	Nicotianamine aminotransferase 2 [Source:UniProtKB/TrEMBL;Acc:A0A1D5RWZ6]	GO:0006520;GO:0009058;GO:0033855;GO:0008483;GO:0016740;GO:0003824;GO:003017	BP:cellular amino acid metabolic process;BP:biosynthetic process;MF:nicotianamine aminotransferase activity;MF:transaminase activity;MF:transferase activity;MF:catalytic activity;MF:pyridoxal phosphate binding;	K14271	NAAT	------	------	COG0436	E:Amino acid transport and metabolism	ARQ30111.1	nicotianamine aminotransferase 2 [Triticum aestivum]	sp|Q9ST03|NAATB_HORVU;	Nicotianamine aminotransferase B OS=Hordeum vulgare OX=4513 GN=naat-B PE=1 SV=2;	PF00155.23;PF01212.23;PF00266.21	Aminotran_1_2;Beta_elim_lyase;Aminotran_5	Aminotransferase class I and II;Beta-eliminating lyase;Aminotransferase class-V

## Sheet: TableS3-2 MEblack
Gene_id	CK	Al	Mn	Gene_description	GO_id	GO_term	KO_id	KO_name	Pathway_id	Pathway_definition	COG_id	COG_Functional Categories	NR_hit-name	NR_description	Swiss-Prot_hit-name	Swiss-Prot_description	Pfam_id	Domain	Domain description
TraesCSU02G105500	4.03083	7.49583	4.57	-	GO:0016021;GO:0005524;GO:0005515;GO:000467	CC:integral component of membrane;MF:ATP binding;MF:protein binding;MF:protein kinase activity;	------	------	------	------	COG4886	S:Function unknown	KAG2589757.1	hypothetical protein PVAP13_5NG381923 [Panicum virgatum]	------	------	PF13855.8;PF12799.9	LRR_8;LRR_4	Leucine rich repeat;Leucine Rich repeats
TraesCSU02G104900	2.9375	7.3075	3.135	-	GO:0031146;GO:001900	BP:SCF-dependent proteasomal ubiquitin-dependent protein catabolic process;CC:SCF ubiquitin ligase complex;	K15082	RAD7	------	------	ENOG410XQ54	S:Function unknown	KAF7071121.1	hypothetical protein CFC21_076525 [Triticum aestivum]	------	------	------	------	------
TraesCS7D02G501500	4.04917	7.27667	5.09833	-	------	------	------	------	------	------	ENOG41106UZ;ENOG41104CA;ENOG41104PF	S:Function unknown;K:Transcription;S:Function unknown	KAF7111497.1	hypothetical protein CFC21_111502 [Triticum aestivum]	------	------	PF00170.23;PF15035.8	bZIP_1;Rootletin	bZIP transcription factor;Ciliary rootlet component, centrosome cohesion
TraesCS7D02G483200	6.625	16.4317	9.89583	AP2-like ethylene-responsive transcription factor AIL5 [Source:Projected from Arabidopsis thaliana (AT5G57390) UniProtKB/Swiss-Prot;Acc:Q6PQQ3]	GO:0006355;GO:0006351;GO:0005634;GO:0003700;GO:000367	BP:regulation of transcription, DNA-templated;BP:transcription, DNA-templated;CC:nucleus;MF:transcription factor activity, sequence-specific DNA binding;MF:DNA binding;	K09285	OVM, ANT	------	------	ENOG410Y90A	K:Transcription	XP_020183528.1	AP2-like ethylene-responsive transcription factor AIL5 [Aegilops tauschii subsp. strangulata]	sp|Q5YGP7|PLET2_ARATH;	AP2-like ethylene-responsive transcription factor PLT2 OS=Arabidopsis thaliana OX=3702 GN=PLT2 PE=2 SV=1;	PF00847.22	AP2	AP2 domain
TraesCS7D02G466100	4.96417	8.6825	5.94167	-	------	------	------	------	------	------	ENOG410ZCTV	S:Function unknown	XP_020196677.1	VQ motif-containing protein 22 [Aegilops tauschii subsp. strangulata]	sp|Q9LIE6|VQ22_ARATH;	VQ motif-containing protein 22 OS=Arabidopsis thaliana OX=3702 GN=VQ22 PE=2 SV=1;	PF05678.16	VQ	VQ motif
TraesCS7D02G460700	3.58	7.70667	3.44417	Phosphoglycerate kinase [Source:UniProtKB/TrEMBL;Acc:A0A1D6CST5]	GO:0006096;GO:0006094;GO:0005829;GO:0043531;GO:0004618;GO:000552	BP:glycolytic process;BP:gluconeogenesis;CC:cytosol;MF:ADP binding;MF:phosphoglycerate kinase activity;MF:ATP binding;	K00927	PGK, pgk	map00010;map00710	Glycolysis / Gluconeogenesis;Carbon fixation in photosynthetic organisms	COG0126	G:Carbohydrate transport and metabolism	XP_020178477.2	phosphoglycerate kinase, cytosolic [Aegilops tauschii subsp. strangulata]	sp|P12783|PGKY_WHEAT;	Phosphoglycerate kinase, cytosolic OS=Triticum aestivum OX=4565 PE=2 SV=1;	PF00162.21	PGK	Phosphoglycerate kinase
TraesCS7D02G435200	10.3075	20.9025	11.4958	-	GO:001602	CC:integral component of membrane;	------	------	------	------	ENOG410YZ3J	S:Function unknown	KAF7110761.1	hypothetical protein CFC21_110841 [Triticum aestivum]	sp|Q6NLF7|LTPG7_ARATH;	Non-specific lipid transfer protein GPI-anchored 7 OS=Arabidopsis thaliana OX=3702 GN=LTPG7 PE=2 SV=1;	PF14368.8	LTP_2	Probable lipid transfer
TraesCS7D02G420500	6.3025	18.9958	7.73917	Peroxidase [Source:UniProtKB/TrEMBL;Acc:A0A341ZI75]	GO:0006979;GO:0042744;GO:0005576;GO:0020037;GO:0046872;GO:000460	BP:response to oxidative stress;BP:hydrogen peroxide catabolic process;CC:extracellular region;MF:heme binding;MF:metal ion binding;MF:peroxidase activity;	K00430	E1.11.1.7	map00940	Phenylpropanoid biosynthesis	ENOG41107Z2	G:Carbohydrate transport and metabolism	KAF7103428.1	hypothetical protein CFC21_104417 [Triticum aestivum]	sp|Q96518|PER16_ARATH;	Peroxidase 16 OS=Arabidopsis thaliana OX=3702 GN=PER16 PE=1 SV=2;	PF00141.25	peroxidase	Peroxidase
TraesCS7D02G401000	3.62667	14.7792	5.60417	-	GO:001674	MF:transferase activity, transferring acyl groups other than amino-acyl groups;	K19861	BEBT, AMAT	------	------	ENOG410XNR7	S:Function unknown	XP_020166140.1	benzyl alcohol O-benzoyltransferase [Aegilops tauschii subsp. strangulata]	sp|Q6E593|BEBT1_PETHY;	Benzyl alcohol O-benzoyltransferase OS=Petunia hybrida OX=4102 GN=BEBT1 PE=1 SV=1;	PF02458.17	Transferase	Transferase family
TraesCS7D02G400200	6.24333	9.17667	5.70417	-	GO:0043086;GO:000485	BP:negative regulation of catalytic activity;MF:enzyme inhibitor activity;	------	------	------	------	ENOG41116V7	S:Function unknown	XP_020192932.1	21 kDa protein [Aegilops tauschii subsp. strangulata]	sp|P17407|21KD_DAUCA;	21 kDa protein OS=Daucus carota OX=4039 PE=2 SV=1;	PF04043.17	PMEI	Plant invertase/pectin methylesterase inhibitor
TraesCS7D02G393300	2.92417	4.23083	2.61667	Expansin [Source:UniProtKB/TrEMBL;Acc:W5HX72]	GO:0009664;GO:0080167;GO:0006949;GO:0005618;GO:0016020;GO:000557	BP:plant-type cell wall organization;BP:response to karrikin;BP:syncytium formation;CC:cell wall;CC:membrane;CC:extracellular region;	------	------	------	------	ENOG410YAZE	G:Carbohydrate transport and metabolism	XP_020155716.1	expansin-A16 [Aegilops tauschii subsp. strangulata]	sp|Q69XV9|EXP16_ORYSJ;	Expansin-A16 OS=Oryza sativa subsp. japonica OX=39947 GN=EXPA16 PE=2 SV=1;	PF01357.23;PF03330.20	Expansin_C;DPBB_1	Expansin C-terminal domain;Lytic transglycolase
TraesCS7D02G378500	4.32583	7.22083	4.63083	-	GO:000550	MF:calcium ion binding;	K13448	CML	map04626	Plant-pathogen interaction	COG5126;COG5126;COG5126	D:Cell cycle control, cell division, chromosome partitioning;T:Signal transduction mechanisms;Z:Cytoskeleton	XP_020148392.1	probable calcium-binding protein CML21 [Aegilops tauschii subsp. strangulata]	sp|Q52K82|CML21_ARATH;	Probable calcium-binding protein CML21 OS=Arabidopsis thaliana OX=3702 GN=CML21 PE=2 SV=1;	PF00036.34;PF13499.8;PF13405.8;PF13202.8;PF13833.8;PF10591.11	EF-hand_1;EF-hand_7;EF-hand_6;EF-hand_5;EF-hand_8;SPARC_Ca_bdg	EF hand;EF-hand domain pair;EF-hand domain;EF hand;EF-hand domain pair;Secreted protein acidic and rich in cysteine Ca binding region
TraesCS7D02G364600	2.97167	4.38667	3.23917	-	GO:1905183;GO:0009738;GO:0080163;GO:0009845;GO:0009414;GO:0009409;GO:0005737;GO:0005634;GO:0005829;GO:0038023;GO:0004864;GO:0010427;GO:004280	BP:negative regulation of protein serine/threonine phosphatase activity;BP:abscisic acid-activated signaling pathway;BP:regulation of protein serine/threonine phosphatase activity;BP:seed germination;BP:response to water deprivation;BP:response to cold;CC:cytoplasm;CC:nucleus;CC:cytosol;MF:signaling receptor activity;MF:protein phosphatase inhibitor activity;MF:abscisic acid binding;MF:protein ho…	K14496	PYL	map04016;map04075	MAPK signaling pathway - plant;Plant hormone signal transduction	ENOG410YE0A	S:Function unknown	XP_020164991.1	abscisic acid receptor PYL9 [Aegilops tauschii subsp. strangulata]	sp|Q5Z8S0|PYL9_ORYSJ;	Abscisic acid receptor PYL9 OS=Oryza sativa subsp. japonica OX=39947 GN=PYL9 PE=1 SV=1;	PF10604.11;PF00407.21;PF03364.22	Polyketide_cyc2;Bet_v_1;Polyketide_cyc	Polyketide cyclase / dehydrase and lipid transport;Pathogenesis-related protein Bet v 1 family;Polyketide cyclase / dehydrase and lipid transport
TraesCS7D02G349900	3.785	5.48833	3.06417	GTP-binding nuclear protein [Source:UniProtKB/TrEMBL;Acc:A0A1D6CLC0]	GO:0006606;GO:0006913;GO:0000054;GO:0015031;GO:0005737;GO:0005634;GO:0003924;GO:000552	BP:protein import into nucleus;BP:nucleocytoplasmic transport;BP:ribosomal subunit export from nucleus;BP:protein transport;CC:cytoplasm;CC:nucleus;MF:GTPase activity;MF:GTP binding;	K07936	RAN	map03008;map03013	Ribosome biogenesis in eukaryotes;Nucleocytoplasmic transport	ENOG410XNRS	S:Function unknown	XP_020174174.1	GTP-binding nuclear protein Ran-3 [Aegilops tauschii subsp. strangulata]	sp|A2YEQ6|RAN3_ORYSI;	GTP-binding nuclear protein Ran-3 OS=Oryza sativa subsp. indica OX=39946 GN=RAN3 PE=2 SV=2;	PF00071.24;PF08477.15;PF00025.23;PF00910.24	Ras;Roc;Arf;RNA_helicase	Ras family;Ras of Complex, Roc, domain of DAPkinase;ADP-ribosylation factor family;RNA helicase
TraesCS7D02G346300	3.565	6.87167	4.11417	-	GO:004698	MF:protein dimerization activity;	------	------	------	------	ENOG410YMUM	K:Transcription	KAF7109726.1	hypothetical protein CFC21_109939 [Triticum aestivum]	sp|Q9ASX9|BH144_ARATH;	Transcription factor bHLH144 OS=Arabidopsis thaliana OX=3702 GN=BHLH144 PE=1 SV=1;	------	------	------
TraesCS7D02G343800	5.98833	8.51	4.195	-	GO:0070973;GO:0006888;GO:0006886;GO:0005783;GO:0005789;GO:001602	BP:protein localization to endoplasmic reticulum exit site;BP:ER to Golgi vesicle-mediated transport;BP:intracellular protein transport;CC:endoplasmic reticulum;CC:endoplasmic reticulum membrane;CC:integral component of membrane;	K14009	BCAP31, BAP31	map04141	Protein processing in endoplasmic reticulum	COG5374	S:Function unknown	XP_020155052.1	B-cell receptor-associated protein 31 [Aegilops tauschii subsp. strangulata]	------	------	PF17098.7;PF05529.14	Wtap;Bap31	WTAP/Mum2p family;Bap31/Bap29 transmembrane region
TraesCS7D02G329400	8.8425	15.6383	10.93	-	GO:0005975;GO:000455	BP:carbohydrate metabolic process;MF:hydrolase activity, hydrolyzing O-glycosyl compounds;	------	------	------	------	ENOG410Y9S4	G:Carbohydrate transport and metabolism	XP_020193434.1	glucan endo-1,3-beta-glucosidase 11 isoform X1 [Aegilops tauschii subsp. strangulata]	sp|Q8L868|E1311_ARATH;	Glucan endo-1,3-beta-glucosidase 11 OS=Arabidopsis thaliana OX=3702 GN=At1g32860 PE=2 SV=1;	PF00332.20	Glyco_hydro_17	Glycosyl hydrolases family 17
TraesCS7D02G296500	2.63333	5.88667	3.10917	-	GO:0055062;GO:0055085;GO:0016021;GO:002285	BP:phosphate ion homeostasis;BP:transmembrane transport;CC:integral component of membrane;MF:transmembrane transporter activity;	K13783	SLC37A1_2	------	------	COG2271	G:Carbohydrate transport and metabolism	VAI87921.1	unnamed protein product [Triticum turgidum subsp. durum]	sp|Q9C5L3|GLPT1_ARATH;	Putative glycerol-3-phosphate transporter 1 OS=Arabidopsis thaliana OX=3702 GN=At3g47420 PE=2 SV=1;	PF07690.18	MFS_1	Major Facilitator Superfamily
TraesCS7D02G239500	8.31667	12.1208	10.5333	-	GO:0032259;GO:000817	BP:methylation;MF:O-methyltransferase activity;	K18883	ROMT	------	------	ENOG410YXFJ	S:Function unknown	XP_020170919.1	uncharacterized protein LOC109756493 [Aegilops tauschii subsp. strangulata]	------	------	------	------	------
TraesCS7D02G208300	2.63833	7.41	3.5475	-	------	------	------	------	------	------	ENOG41119KI	S:Function unknown	XP_020161421.1	uncharacterized protein At1g66480 [Aegilops tauschii subsp. strangulata]	sp|Q6NLC8|Y1648_ARATH;	Uncharacterized protein At1g66480 OS=Arabidopsis thaliana OX=3702 GN=At1g66480 PE=2 SV=1;	PF14009.8	PADRE	PADRE domain
TraesCS7D02G177000	1.80417	14.3942	3.325	-	GO:000905	MF:electron carrier activity;	------	------	------	------	ENOG410YPAM	S:Function unknown	XP_020177549.1	blue copper protein 1b [Aegilops tauschii subsp. strangulata]	sp|A0A072U307|BCP1B_MEDTR;	Blue copper protein 1b OS=Medicago truncatula OX=3880 GN=BCP1B PE=2 SV=1;	PF02298.19	Cu_bind_like	Plastocyanin-like domain
TraesCS7D02G167000	7.85083	14.4383	7.87333	Mechanosensitive ion channel protein [Source:UniProtKB/TrEMBL;Acc:A0A1D6CXG4]	GO:0050982;GO:0006820;GO:0055085;GO:0016021;GO:0016020;GO:0005886;GO:000838	BP:detection of mechanical stimulus;BP:anion transport;BP:transmembrane transport;CC:integral component of membrane;CC:membrane;CC:plasma membrane;MF:mechanically-gated ion channel activity;	K22048	MSL4S	------	------	COG0668	M:Cell wall/membrane/envelope biogenesis	XP_020190776.1	mechanosensitive ion channel protein 10 [Aegilops tauschii subsp. strangulata]	sp|Q9LYG9|MSL10_ARATH;	Mechanosensitive ion channel protein 10 OS=Arabidopsis thaliana OX=3702 GN=MSL10 PE=1 SV=1;	PF00924.20	MS_channel	Mechanosensitive ion channel
TraesCS7D02G077100	3.29167	4.83083	2.61833	-	GO:000399	MF:acid phosphatase activity;	------	------	------	------	ENOG410YBHH	S:Function unknown	KAF7106406.1	hypothetical protein CFC21_107140 [Triticum aestivum]	sp|P27061|PPA1_SOLLC;	Acid phosphatase 1 OS=Solanum lycopersicum OX=4081 GN=APS1 PE=2 SV=1;	PF03767.16	Acid_phosphat_B	HAD superfamily, subfamily IIIB
TraesCS7B02G401400	8.095	26.4042	13.2425	AP2-like ethylene-responsive transcription factor AIL5 [Source:Projected from Arabidopsis thaliana (AT5G57390) UniProtKB/Swiss-Prot;Acc:Q6PQQ3]	GO:0006355;GO:0006351;GO:0005634;GO:0003700;GO:000367	BP:regulation of transcription, DNA-templated;BP:transcription, DNA-templated;CC:nucleus;MF:transcription factor activity, sequence-specific DNA binding;MF:DNA binding;	K09285	OVM, ANT	------	------	ENOG410Y90A	K:Transcription	XP_037466699.1	AP2-like ethylene-responsive transcription factor AIL5 [Triticum dicoccoides]	sp|Q6PQQ3|AIL5_ARATH;	AP2-like ethylene-responsive transcription factor AIL5 OS=Arabidopsis thaliana OX=3702 GN=AIL5 PE=2 SV=2;	PF00847.22	AP2	AP2 domain
TraesCS7B02G369600	2.3075	5.04667	2.6825	-	GO:0031146;GO:001900	BP:SCF-dependent proteasomal ubiquitin-dependent protein catabolic process;CC:SCF ubiquitin ligase complex;	K15082	RAD7	------	------	ENOG410XQ54	S:Function unknown	KAF7103916.1	hypothetical protein CFC21_104847 [Triticum aestivum]	------	------	------	------	------
TraesCS7B02G328400	2.7675	6.27917	3.11417	Peroxidase [Source:UniProtKB/TrEMBL;Acc:A0A1D6CBF2]	GO:0006979;GO:0042744;GO:0005576;GO:0020037;GO:0046872;GO:000460	BP:response to oxidative stress;BP:hydrogen peroxide catabolic process;CC:extracellular region;MF:heme binding;MF:metal ion binding;MF:peroxidase activity;	K00430	E1.11.1.7	map00940	Phenylpropanoid biosynthesis	ENOG41107Z2;ENOG411050R	G:Carbohydrate transport and metabolism;	KAF7103428.1	hypothetical protein CFC21_104417 [Triticum aestivum]	sp|Q96518|PER16_ARATH;	Peroxidase 16 OS=Arabidopsis thaliana OX=3702 GN=PER16 PE=1 SV=2;	PF00141.25	peroxidase	Peroxidase
TraesCS7B02G325900	2.545	8.05833	2.74917	-	GO:0006468;GO:0007166;GO:0016021;GO:0004674;GO:0004672;GO:000552	BP:protein phosphorylation;BP:cell surface receptor signaling pathway;CC:integral component of membrane;MF:protein serine/threonine kinase activity;MF:protein kinase activity;MF:ATP binding;	------	------	------	------	COG0515	T:Signal transduction mechanisms	KAF7103399.1	hypothetical protein CFC21_104387 [Triticum aestivum]	sp|O65479|CRK20_ARATH;	Putative cysteine-rich receptor-like protein kinase 20 OS=Arabidopsis thaliana OX=3702 GN=CRK20 PE=2 SV=2;	PF00069.27;PF07714.19	Pkinase;PK_Tyr_Ser-Thr	Protein kinase domain;Protein tyrosine and serine/threonine kinase
TraesCS7B02G307700	3.8125	16.8825	4.96167	-	GO:001674	MF:transferase activity, transferring acyl groups other than amino-acyl groups;	K19861	BEBT, AMAT	------	------	ENOG410XNR7	S:Function unknown	XP_037466462.1	benzyl alcohol O-benzoyltransferase-like [Triticum dicoccoides]	sp|Q6E593|BEBT1_PETHY;	Benzyl alcohol O-benzoyltransferase OS=Petunia hybrida OX=4102 GN=BEBT1 PE=1 SV=1;	PF02458.17	Transferase	Transferase family
TraesCS7B02G302500	4.12083	10.755	5.60667	-	GO:0006310;GO:0006281;GO:0005634;GO:003091	BP:DNA recombination;BP:DNA repair;CC:nucleus;CC:Smc5-Smc6 complex;	K22825	NSMCE4, NSE4	------	------	COG5125	S:Function unknown	KAF7103139.1	hypothetical protein CFC21_104166 [Triticum aestivum]	sp|Q9C689|NSE4A_ARATH;	Non-structural maintenance of chromosomes element 4 homolog A OS=Arabidopsis thaliana OX=3702 GN=NSE4A PE=2 SV=1;	PF08743.12	Nse4_C	Nse4 C-terminal
TraesCS7B02G288300	3.64917	6.025	3.41667	-	GO:0006468;GO:0004674;GO:0005524;GO:000467	BP:protein phosphorylation;MF:protein serine/threonine kinase activity;MF:ATP binding;MF:protein kinase activity;	------	------	------	------	COG0515	T:Signal transduction mechanisms	XP_037464821.1	probable serine/threonine-protein kinase PBL19 [Triticum dicoccoides]	sp|Q9LTC0|PBL19_ARATH;	Probable serine/threonine-protein kinase PBL19 OS=Arabidopsis thaliana OX=3702 GN=PBL19 PE=1 SV=1;	PF00069.27;PF07714.19	Pkinase;PK_Tyr_Ser-Thr	Protein kinase domain;Protein tyrosine and serine/threonine kinase
TraesCS7B02G250300	4.95	8.68583	5.90333	-	GO:004698	MF:protein dimerization activity;	------	------	------	------	ENOG410YMUM	K:Transcription	XP_037468463.1	transcription factor bHLH144-like [Triticum dicoccoides]	sp|Q9ASX9|BH144_ARATH;	Transcription factor bHLH144 OS=Arabidopsis thaliana OX=3702 GN=BHLH144 PE=1 SV=1;	------	------	------
TraesCS7B02G112900	2.7875	7.725	3.415	-	GO:000588	CC:plasma membrane;	------	------	------	------	ENOG41119KI	S:Function unknown	XP_037468165.1	uncharacterized protein At1g66480-like [Triticum dicoccoides]	sp|Q6NLC8|Y1648_ARATH;	Uncharacterized protein At1g66480 OS=Arabidopsis thaliana OX=3702 GN=At1g66480 PE=2 SV=1;	PF14009.8	PADRE	PADRE domain
TraesCS7B02G112800	3.2525	10.475	4.685	-	------	------	------	------	------	------	ENOG41119KI	S:Function unknown	KAF7100630.1	hypothetical protein CFC21_102123 [Triticum aestivum]	sp|Q6NLC8|Y1648_ARATH;	Uncharacterized protein At1g66480 OS=Arabidopsis thaliana OX=3702 GN=At1g66480 PE=2 SV=1;	PF14009.8	PADRE	PADRE domain
TraesCS7B02G100000	2.80583	3.7175	2.79833	RNI-like superfamily protein [Source:Projected from Arabidopsis thaliana (AT1G10510) UniProtKB/TrEMBL;Acc:Q93ZV8]	GO:0009941;GO:0005739;GO:000551	CC:chloroplast envelope;CC:mitochondrion;MF:protein binding;	K22614	NLRC3, NOD3	------	------	ENOG410ZBX3	S:Function unknown	XP_037465778.1	NLR family CARD domain-containing protein 3-like isoform X1 [Triticum dicoccoides]	------	------	PF13516.8	LRR_6	Leucine Rich repeat
TraesCS7B02G068300	14.5583	17.4958	12.395	-	GO:0009607;GO:0009738;GO:0006952;GO:0080163;GO:0005737;GO:0005634;GO:0004864;GO:0038023;GO:001042	BP:response to biotic stimulus;BP:abscisic acid-activated signaling pathway;BP:defense response;BP:regulation of protein serine/threonine phosphatase activity;CC:cytoplasm;CC:nucleus;MF:protein phosphatase inhibitor activity;MF:signaling receptor activity;MF:abscisic acid binding;	------	------	------	------	ENOG410YZ38	S:Function unknown	KAF7100069.1	hypothetical protein CFC21_101626 [Triticum aestivum]	sp|Q05736|PR1_ASPOF;	Pathogenesis-related protein 1 OS=Asparagus officinalis OX=4686 GN=PR1 PE=2 SV=1;	PF00407.21	Bet_v_1	Pathogenesis-related protein Bet v 1 family
TraesCS7B02G056700	2.6525	4.475	3.26417	-	GO:0055085;GO:0006811;GO:0016020;GO:0016021;GO:0005249;GO:0005216;GO:000551	BP:transmembrane transport;BP:ion transport;CC:membrane;CC:integral component of membrane;MF:voltage-gated potassium channel activity;MF:ion channel activity;MF:protein binding;	K05391	CNGC	map04626	Plant-pathogen interaction	ENOG410XPSE	U:Intracellular trafficking, secretion, and vesicular transport	KAF7099939.1	hypothetical protein CFC21_101513 [Triticum aestivum]	sp|Q8L7Z0|CNG17_ARATH;	Cyclic nucleotide-gated ion channel 17 OS=Arabidopsis thaliana OX=3702 GN=CNGC17 PE=1 SV=1;	PF00520.33;PF00027.31	Ion_trans;cNMP_binding	Ion transport protein;Cyclic nucleotide-binding domain
TraesCS7B02G054100	3.475	6.9875	3.73	-	GO:001674	MF:transferase activity, transferring acyl groups other than amino-acyl groups;	K13065	E2.3.1.133, HCT	map00941;map00940;map00945	Flavonoid biosynthesis;Phenylpropanoid biosynthesis;Stilbenoid, diarylheptanoid and gingerol biosynthesis	ENOG410XNR7	S:Function unknown	KAF7099903.1	hypothetical protein CFC21_101484 [Triticum aestivum]	sp|Q5SMM6|HCT4_ORYSJ;	Hydroxycinnamoyltransferase 4 OS=Oryza sativa subsp. japonica OX=39947 GN=HCT4 PE=1 SV=1;	PF02458.17	Transferase	Transferase family
TraesCS7B02G052300	10.3908	27.4667	13.7442	-	GO:001602	CC:integral component of membrane;	K03671	trxA	------	------	COG0526	O:Posttranslational modification, protein turnover, chaperones	KAF7099877.1	hypothetical protein CFC21_101464 [Triticum aestivum]	------	------	PF00085.22;PF13848.8	Thioredoxin;Thioredoxin_6	Thioredoxin;Thioredoxin-like domain
TraesCS7B02G047300	2.63583	4.3125	2.8625	-	GO:0006468;GO:0005634;GO:0004674;GO:0005515;GO:0004672;GO:000552	BP:protein phosphorylation;CC:nucleus;MF:protein serine/threonine kinase activity;MF:protein binding;MF:protein kinase activity;MF:ATP binding;	------	------	------	------	COG0515	T:Signal transduction mechanisms	KAF7099812.1	hypothetical protein CFC21_101399 [Triticum aestivum]	sp|Q05609|CTR1_ARATH;	Serine/threonine-protein kinase CTR1 OS=Arabidopsis thaliana OX=3702 GN=CTR1 PE=1 SV=1;	PF07714.19;PF00069.27;PF00564.26	PK_Tyr_Ser-Thr;Pkinase;PB1	Protein tyrosine and serine/threonine kinase;Protein kinase domain;PB1 domain
TraesCS7B02G028700	6.3925	14.4608	9.27333	-	GO:0006355;GO:0006351;GO:0005634;GO:0003700;GO:000367	BP:regulation of transcription, DNA-templated;BP:transcription, DNA-templated;CC:nucleus;MF:transcription factor activity, sequence-specific DNA binding;MF:DNA binding;	K09286	EREBP	------	------	ENOG410YR77;ENOG41117TK	K:Transcription;	XP_037464376.1	ethylene-responsive transcription factor RAP2-9-like [Triticum dicoccoides]	sp|Q8W3M3|RAP29_ARATH;	Ethylene-responsive transcription factor RAP2-9 OS=Arabidopsis thaliana OX=3702 GN=RAP2-9 PE=2 SV=1;	PF00847.22	AP2	AP2 domain
TraesCS7B02G008000	2.41167	5.1925	3.39667	-	------	------	------	------	------	------	ENOG410YMWR	S:Function unknown	XP_037469963.1	chloride intracellular channel protein 6-like [Triticum dicoccoides]	------	------	------	------	------
TraesCS7A02G525600	5.88083	12.3742	7.47833	-	GO:0006749;GO:0004364;GO:000551	BP:glutathione metabolic process;MF:glutathione transferase activity;MF:protein binding;	K00799	GST, gst	map00480	Glutathione metabolism	COG0625	O:Posttranslational modification, protein turnover, chaperones	KAF7098713.1	hypothetical protein CFC21_100429 [Triticum aestivum]	sp|O65857|GSTF1_ORYSJ;	Probable glutathione S-transferase GSTF1 OS=Oryza sativa subsp. japonica OX=39947 GN=GSTF1 PE=1 SV=2;	PF00043.27;PF02798.22;PF13417.8;PF13409.8;PF14497.8;PF13410.8	GST_C;GST_N;GST_N_3;GST_N_2;GST_C_3;GST_C_2	Glutathione S-transferase, C-terminal domain;Glutathione S-transferase, N-terminal domain;Glutathione S-transferase, N-terminal domain;Glutathione S-transferase, N-terminal domain;Glutathione S-transferase, C-terminal domain;Glutathione S-transferase, C-terminal domain
TraesCS7A02G458000	6.3125	9.43083	7.13	-	GO:000588	CC:plasma membrane;	------	------	------	------	ENOG410Y91J	S:Function unknown	VAI79846.1	unnamed protein product [Triticum turgidum subsp. durum]	------	------	PF16709.7	SCAB-Ig	Ig domain of plant-specific actin-binding protein
TraesCS7A02G407600	6.31417	17.1858	7.20167	-	GO:001674	MF:transferase activity, transferring acyl groups other than amino-acyl groups;	K19861	BEBT, AMAT	------	------	ENOG410XNR7	S:Function unknown	KAF7097325.1	hypothetical protein CFC21_099157 [Triticum aestivum]	sp|Q6E593|BEBT1_PETHY;	Benzyl alcohol O-benzoyltransferase OS=Petunia hybrida OX=4102 GN=BEBT1 PE=1 SV=1;	PF02458.17	Transferase	Transferase family
TraesCS7A02G349500	2.07833	5.72917	3.8525	-	GO:0009834;GO:0010455;GO:0006355;GO:0003002;GO:0048829;GO:0005634;GO:000367	BP:plant-type secondary cell wall biogenesis;BP:positive regulation of cell fate commitment;BP:regulation of transcription, DNA-templated;BP:regionalization;BP:root cap development;CC:nucleus;MF:DNA binding;	------	------	------	------	ENOG410YDYB	K:Transcription	XP_037461199.1	NAC domain-containing protein 76-like [Triticum dicoccoides]	sp|Q5Z6B6|NAC76_ORYSJ;	NAC domain-containing protein 76 OS=Oryza sativa subsp. japonica OX=39947 GN=NAC076 PE=2 SV=2;	PF02365.17	NAM	No apical meristem
TraesCS7A02G349200	5.15833	10.705	5.0525	-	GO:0005975;GO:0046658;GO:000455	BP:carbohydrate metabolic process;CC:anchored component of plasma membrane;MF:hydrolase activity, hydrolyzing O-glycosyl compounds;	------	------	------	------	ENOG410Y9S4	G:Carbohydrate transport and metabolism	XP_037463040.1	glucan endo-1,3-beta-glucosidase 11-like isoform X1 [Triticum dicoccoides]	sp|Q8L868|E1311_ARATH;	Glucan endo-1,3-beta-glucosidase 11 OS=Arabidopsis thaliana OX=3702 GN=At1g32860 PE=2 SV=1;	PF00332.20	Glyco_hydro_17	Glycosyl hydrolases family 17
TraesCS7A02G336100	8.11083	13.2042	6.34333	-	GO:0070973;GO:0006888;GO:0006886;GO:0005783;GO:0005789;GO:001602	BP:protein localization to endoplasmic reticulum exit site;BP:ER to Golgi vesicle-mediated transport;BP:intracellular protein transport;CC:endoplasmic reticulum;CC:endoplasmic reticulum membrane;CC:integral component of membrane;	K14009	BCAP31, BAP31	map04141	Protein processing in endoplasmic reticulum	COG5374	S:Function unknown	XP_037461215.1	B-cell receptor-associated protein 31-like [Triticum dicoccoides]	------	------	PF17098.7	Wtap	WTAP/Mum2p family
TraesCS7A02G225000	5.87583	9.03333	5.05083	-	------	------	------	------	------	------	ENOG410ZBXG	S:Function unknown	KAF7095029.1	hypothetical protein CFC21_097275 [Triticum aestivum]	------	------	------	------	------
TraesCS7A02G183000	3.99833	7.67167	4.29833	-	GO:0009809;GO:0016616;GO:0052747;GO:0045551;GO:0008270;GO:001649	BP:lignin biosynthetic process;MF:oxidoreductase activity, acting on the CH-OH group of donors, NAD or NADP as acceptor;MF:sinapyl alcohol dehydrogenase activity;MF:cinnamyl-alcohol dehydrogenase activity;MF:zinc ion binding;MF:oxidoreductase activity;	------	------	------	------	COG1064	C:Energy production and conversion	KAF7094534.1	hypothetical protein CFC21_096835 [Triticum aestivum]	sp|Q6ERX1|CAD8A_ORYSJ;	Probable cinnamyl alcohol dehydrogenase 8A OS=Oryza sativa subsp. japonica OX=39947 GN=CAD8A PE=2 SV=1;	PF08240.14;PF00107.28;PF02826.21	ADH_N;ADH_zinc_N;2-Hacid_dh_C	Alcohol dehydrogenase GroES-like domain;Zinc-binding dehydrogenase;D-isomer specific 2-hydroxyacid dehydrogenase, NAD binding domain
TraesCS7A02G170600	2.7625	5.71333	3.12917	bZIP transcription factor, Positive regulator of ABA signaling, Drought toleranc [Source: Projected from Oryza sativa (Os06g0211200)]	GO:0009738;GO:0006355;GO:0045893;GO:0009414;GO:0009651;GO:0009789;GO:0005634;GO:0043565;GO:000370	BP:abscisic acid-activated signaling pathway;BP:regulation of transcription, DNA-templated;BP:positive regulation of transcription, DNA-templated;BP:response to water deprivation;BP:response to salt stress;BP:positive regulation of abscisic acid-activated signaling pathway;CC:nucleus;MF:sequence-specific DNA binding;MF:transcription factor activity, sequence-specific DNA binding;	K14432	ABF	map04075	Plant hormone signal transduction	ENOG410YFZJ	K:Transcription	VAI71945.1	unnamed protein product [Triticum turgidum subsp. durum]	sp|Q69TW5|BZP46_ORYSJ;	bZIP transcription factor 46 OS=Oryza sativa subsp. japonica OX=39947 GN=BZIP46 PE=1 SV=1;	PF00170.23;PF07716.17;PF03131.19	bZIP_1;bZIP_2;bZIP_Maf	bZIP transcription factor;Basic region leucine zipper;bZIP Maf transcription factor
TraesCS7A02G090300	8.75833	56.7142	5.80167	-	GO:0016021;GO:001602	CC:integral component of membrane;CC:membrane;	------	------	------	------	ENOG410ZBCE	S:Function unknown	KAF7093468.1	hypothetical protein CFC21_095878 [Triticum aestivum]	------	------	PF12734.9	CYSTM	Cysteine-rich TM module stress tolerance
TraesCS6D02G393000	4.6875	8.99417	3.7975	-	------	------	------	------	------	------	ENOG411184S	S:Function unknown	KAF7081598.1	hypothetical protein CFC21_085524 [Triticum aestivum]	------	------	------	------	------
TraesCS6D02G382600	6.28333	33.27	12.2183	-	GO:0009755;GO:0007275;GO:0045893;GO:000563	BP:hormone-mediated signaling pathway;BP:multicellular organism development;BP:positive regulation of transcription, DNA-templated;CC:nucleus;	K13944	LBD16	------	------	ENOG410YA3N	S:Function unknown	KAF7092149.1	hypothetical protein CFC21_094657 [Triticum aestivum]	sp|Q5UG13|LBD_ORYSJ;	LOB domain-containing protein CRL1 OS=Oryza sativa subsp. japonica OX=39947 GN=CRL1 PE=1 SV=1;	PF03195.16	LOB	Lateral organ boundaries
TraesCS6D02G372100	3.03917	4.75333	3.2625	-	GO:0000398;GO:0005681;GO:0070122;GO:0030623;GO:0008237;GO:001707	BP:mRNA splicing, via spliceosome;CC:spliceosomal complex;MF:isopeptidase activity;MF:U5 snRNA binding;MF:metallopeptidase activity;MF:U6 snRNA binding;	K12856	PRPF8, PRP8	map03040	Spliceosome	COG5178	A:RNA processing and modification	KAF7092034.1	hypothetical protein CFC21_094556 [Triticum aestivum]	sp|Q9SSD2|PRP8A_ARATH;	Pre-mRNA-processing-splicing factor 8A OS=Arabidopsis thaliana OX=3702 GN=PRP8A PE=1 SV=1;	PF12134.10	PRP8_domainIV	PRP8 domain IV core
TraesCS6D02G369200	4.3775	16.0525	3.35167	-	GO:000551	MF:protein binding;	------	------	------	------	ENOG410YD6D;COG1249	S:Function unknown;C:Energy production and conversion	KAF7091988.1	hypothetical protein CFC21_094520 [Triticum aestivum]	sp|Q9ZVQ6|P2B10_ARATH;	F-box protein PP2-B10 OS=Arabidopsis thaliana OX=3702 GN=PP2B10 PE=1 SV=1;	PF14299.8;PF12937.9;PF00646.35	PP2;F-box-like;F-box	Phloem protein 2;F-box-like;F-box domain
TraesCS6D02G369100	5.005	9.91083	4.30167	-	GO:000551	MF:protein binding;	------	------	------	------	ENOG410YD6D;COG1249	S:Function unknown;C:Energy production and conversion	KAF7091986.1	hypothetical protein CFC21_094519 [Triticum aestivum]	sp|Q9ZVQ6|P2B10_ARATH;	F-box protein PP2-B10 OS=Arabidopsis thaliana OX=3702 GN=PP2B10 PE=1 SV=1;	PF14299.8;PF00646.35;PF12937.9	PP2;F-box;F-box-like	Phloem protein 2;F-box domain;F-box-like
TraesCS6D02G358200	2.76917	4.525	3.58333	-	GO:0005829;GO:001649	CC:cytosol;MF:oxidoreductase activity;	------	------	------	------	COG0604	C:Energy production and conversion	XP_020165232.1	quinone oxidoreductase PIG3 [Aegilops tauschii subsp. strangulata]	sp|Q53FA7|QORX_HUMAN;	Quinone oxidoreductase PIG3 OS=Homo sapiens OX=9606 GN=TP53I3 PE=1 SV=2;	PF00107.28;PF13602.8;PF08240.14;PF00106.27	ADH_zinc_N;ADH_zinc_N_2;ADH_N;adh_short	Zinc-binding dehydrogenase;Zinc-binding dehydrogenase;Alcohol dehydrogenase GroES-like domain;short chain dehydrogenase
TraesCS6D02G312900	10.4992	31.2075	13.4525	-	------	------	------	------	------	------	ENOG410Z7Z7	S:Function unknown	XP_020164651.1	uncharacterized protein LOC109750105 [Aegilops tauschii subsp. strangulata]	------	------	PF07939.13	DUF1685	Protein of unknown function
TraesCS6D02G295000	2.72417	6.20667	3.00167	-	GO:0046658;GO:0016021;GO:000905	CC:anchored component of plasma membrane;CC:integral component of membrane;MF:electron carrier activity;	------	------	------	------	ENOG41105YJ	S:Function unknown	XP_020146814.1	blue copper protein [Aegilops tauschii subsp. strangulata]	sp|Q41001|BCP_PEA;	Blue copper protein OS=Pisum sativum OX=3888 PE=2 SV=1;	PF02298.19	Cu_bind_like	Plastocyanin-like domain
TraesCS6D02G221600	3.18	5.77667	3.7375	GATA transcription factor [Source:UniProtKB/TrEMBL;Acc:A0A1D6B3C9]	GO:0030154;GO:0006355;GO:0045893;GO:0005634;GO:0043565;GO:0003700;GO:0008270;GO:000367	BP:cell differentiation;BP:regulation of transcription, DNA-templated;BP:positive regulation of transcription, DNA-templated;CC:nucleus;MF:sequence-specific DNA binding;MF:transcription factor activity, sequence-specific DNA binding;MF:zinc ion binding;MF:DNA binding;	------	------	------	------	COG5641	K:Transcription	VAI58993.1	unnamed protein product [Triticum turgidum subsp. durum]	sp|Q9FH57|GATA5_ARATH;	GATA transcription factor 5 OS=Arabidopsis thaliana OX=3702 GN=GATA5 PE=2 SV=1;	PF00320.29;PF10500.11	GATA;SR-25	GATA zinc finger;Nuclear RNA-splicing-associated protein
TraesCS6D02G211900	7.6325	17.1825	9.54167	-	GO:0006468;GO:0018105;GO:0035556;GO:0046777;GO:0005737;GO:0005634;GO:0004683;GO:0009931;GO:0004674;GO:0005516;GO:0004672;GO:000552	BP:protein phosphorylation;BP:peptidyl-serine phosphorylation;BP:intracellular signal transduction;BP:protein autophosphorylation;CC:cytoplasm;CC:nucleus;MF:calmodulin-dependent protein kinase activity;MF:calcium-dependent protein serine/threonine kinase activity;MF:protein serine/threonine kinase activity;MF:calmodulin binding;MF:protein kinase activity;MF:ATP binding;	------	------	------	------	ENOG410XRMJ	T:Signal transduction mechanisms	KAF7090080.1	hypothetical protein CFC21_092899 [Triticum aestivum]	sp|Q9SPK4|PPCK1_ARATH;	Phosphoenolpyruvate carboxylase kinase 1 OS=Arabidopsis thaliana OX=3702 GN=PPCK1 PE=1 SV=1;	PF00069.27;PF07714.19	Pkinase;PK_Tyr_Ser-Thr	Protein kinase domain;Protein tyrosine and serine/threonine kinase
TraesCS6D02G208500	3.42667	5.86333	3.62167	-	GO:0008610;GO:0016021;GO:0005789;GO:0009924;GO:0005506;GO:1990465;GO:001649	BP:lipid biosynthetic process;CC:integral component of membrane;CC:endoplasmic reticulum membrane;MF:octadecanal decarbonylase activity;MF:iron ion binding;MF:aldehyde oxygenas;MF:oxidoreductase activity;	K15404	K15404, CER1	map00073	Cutin, suberine and wax biosynthesis	ENOG4111G66	S:Function unknown	KAF7090038.1	hypothetical protein CFC21_092862 [Triticum aestivum]	sp|B8AFI3|GLO14_ORYSI;	Very-long-chain aldehyde decarbonylase GL1-4 OS=Oryza sativa subsp. indica OX=39946 GN=GL1-4 PE=3 SV=1;	PF12076.10;PF04116.15	Wax2_C;FA_hydroxylase	WAX2 C-terminal domain;Fatty acid hydroxylase superfamily
TraesCS6D02G192400	2.95167	4.96	2.86	-	GO:0006355;GO:000367	BP:regulation of transcription, DNA-templated;MF:DNA binding;	------	------	------	------	ENOG410YA57	S:Function unknown	KAF7089813.1	hypothetical protein CFC21_092688 [Triticum aestivum]	sp|Q6NQK2|NAC8_ARATH;	SUPPRESSOR OF GAMMA RESPONSE 1 OS=Arabidopsis thaliana OX=3702 GN=SOG1 PE=1 SV=1;	PF02365.17	NAM	No apical meristem
TraesCS6D02G134900	4.2025	7.00583	4.44333	-	------	------	------	------	------	------	ENOG41106UZ	S:Function unknown	KAF7096970.1	hypothetical protein CFC21_098849 [Triticum aestivum]	------	------	PF00170.23	bZIP_1	bZIP transcription factor
TraesCS6D02G050000	3.675	8.35833	5.0175	-	------	------	------	------	------	------	ENOG410YZ1F	S:Function unknown	KAF7088027.1	hypothetical protein CFC21_091182 [Triticum aestivum]	------	------	PF14009.8	PADRE	PADRE domain
TraesCS6B02G383600	4.5775	11.8833	2.56917	-	GO:000941	BP:response to water;	------	------	------	------	ENOG410Z1YH	S:Function unknown	KAF7086416.1	hypothetical protein CFC21_089703 [Triticum aestivum]	sp|P12948|DHN3_HORVU;	Dehydrin DHN3 OS=Hordeum vulgare OX=4513 GN=DHN3 PE=2 SV=1;	PF00257.21	Dehydrin	Dehydrin
TraesCS6B02G370900	4.42083	7.78	5.53	-	GO:0006629;GO:0016042;GO:001678	BP:lipid metabolic process;BP:lipid catabolic process;MF:hydrolase activity;	------	------	------	------	ENOG410XRFI	S:Function unknown	XP_037452320.1	uncharacterized protein LOC119322886 [Triticum dicoccoides]	sp|Q8NCG7|DGLB_HUMAN;	Diacylglycerol lipase-beta OS=Homo sapiens OX=9606 GN=DAGLB PE=1 SV=2;	PF01764.27;PF03893.18	Lipase_3;Lipase3_N	Lipase;Lipase 3 N-terminal region
TraesCS6B02G356000	2.8025	10.2133	4.945	-	GO:0046872;GO:0009815;GO:001649	MF:metal ion binding;MF:1-aminocyclopropane-1-carboxylate oxidase activity;MF:oxidoreductase activity;	K05933	E1.14.17.4	map00270	Cysteine and methionine metabolism	COG3491	S:Function unknown	XP_037456062.1	1-aminocyclopropane-1-carboxylate oxidase 1-like [Triticum dicoccoides]	sp|Q08507|ACCO3_PETHY;	1-aminocyclopropane-1-carboxylate oxidase 3 OS=Petunia hybrida OX=4102 GN=ACO3 PE=3 SV=1;	PF03171.22;PF14226.8	2OG-FeII_Oxy;DIOX_N	2OG-F;non-haem dioxygenase in morphine synthesis N-terminal
TraesCS6B02G354200	2.86417	5.94833	3.4175	-	GO:0006811;GO:0055085;GO:0016020;GO:0016021;GO:000521	BP:ion transport;BP:transmembrane transport;CC:membrane;CC:integral component of membrane;MF:ion channel activity;	K05391	CNGC	map04626	Plant-pathogen interaction	ENOG41111V9	S:Function unknown	KAF7086046.1	hypothetical protein CFC21_089402 [Triticum aestivum]	sp|Q9LD37|CNG20_ARATH;	Probable cyclic nucleotide-gated ion channel 20, chloroplastic OS=Arabidopsis thaliana OX=3702 GN=CNGC20 PE=2 SV=1;	PF00520.33;PF00027.31	Ion_trans;cNMP_binding	Ion transport protein;Cyclic nucleotide-binding domain
TraesCS6B02G336500	7.675	14.735	7.3525	Expansin [Source:UniProtKB/TrEMBL;Acc:A0A1D6AKK6]	GO:0009664;GO:0005618;GO:0016020;GO:000557	BP:plant-type cell wall organization;CC:cell wall;CC:membrane;CC:extracellular region;	------	------	------	------	ENOG410YCRV	G:Carbohydrate transport and metabolism	XP_037452524.1	expansin-A5-like [Triticum dicoccoides]	sp|Q6ZGU9|EXPA5_ORYSJ;	Expansin-A5 OS=Oryza sativa subsp. japonica OX=39947 GN=EXPA5 PE=2 SV=1;	PF01357.23;PF03330.20	Expansin_C;DPBB_1	Expansin C-terminal domain;Lytic transglycolase
TraesCS6B02G303800	7.81083	15.3108	7.8875	-	GO:0006468;GO:0016021;GO:0005886;GO:0004672;GO:0004674;GO:000552	BP:protein phosphorylation;CC:integral component of membrane;CC:plasma membrane;MF:protein kinase activity;MF:protein serine/threonine kinase activity;MF:ATP binding;	------	------	------	------	COG0515	T:Signal transduction mechanisms	KAF7080006.1	hypothetical protein CFC21_084159 [Triticum aestivum]	sp|O81906|B120_ARATH;	G-type lectin S-receptor-like serine/threonine-protein kinase B120 OS=Arabidopsis thaliana OX=3702 GN=B120 PE=2 SV=1;	PF07714.19;PF00069.27;PF11883.10	PK_Tyr_Ser-Thr;Pkinase;DUF3403	Protein tyrosine and serine/threonine kinase;Protein kinase domain;Domain of unknown function
TraesCS6B02G289500	10.9483	24.4583	12.6392	-	GO:0006457;GO:0046872;GO:0004842;GO:000552	BP:protein folding;MF:metal ion binding;MF:ubiquitin-protein transferase activity;MF:ATP binding;	K19042	BOI	------	------	ENOG4111S1X;ENOG410YAFW	S:Function unknown;	KAF7085341.1	hypothetical protein CFC21_088781 [Triticum aestivum]	sp|Q9FHE4|BRG1_ARATH;	BOI-related E3 ubiquitin-protein ligase 1 OS=Arabidopsis thaliana OX=3702 GN=BRG1 PE=1 SV=1;	PF13920.8;PF14447.8	zf-C3HC4_3;Prok-RING_4	Zinc finger, C3HC4 type;Prokaryotic RING finger family 4
TraesCS6B02G288700	2.9325	6.38417	4.06167	-	GO:001602	CC:integral component of membrane;	------	------	------	------	ENOG41121N2	O:Posttranslational modification, protein turnover, chaperones	XP_037453783.1	RING-H2 finger protein ATL8-like [Triticum dicoccoides]	sp|Q8LC69|ATL8_ARATH;	RING-H2 finger protein ATL8 OS=Arabidopsis thaliana OX=3702 GN=ATL8 PE=2 SV=2;	PF13639.8;PF17123.7;PF13923.8;PF12678.9;PF00097.27;PF13445.8;PF14634.8;PF14446.8;PF12861.9;PF11793.10;PF13920.8	zf-RING_2;zf-RING_11;zf-C3HC4_2;zf-rbx1;zf-C3HC4;zf-RING_UBOX;zf-RING_5;Prok-RING_1;zf-ANAPC11;FANCL_C;zf-C3HC4_3	Ring finger domain;RING-like zinc finger;Zinc finger, C3HC4 type;RING-H2 zinc finger domain;Zinc finger, C3HC4 type;RING-type zinc-finger;zinc-RING finger domain;Prokaryotic RING finger family 1;Anaphase-promoting complex subunit 11 RING-H2 finger;FANCL C-terminal domain;Zinc finger, C3HC4 type
TraesCS6B02G285300	3.34667	5.92583	4.25083	-	GO:0030154;GO:0006355;GO:0045893;GO:0005634;GO:0043565;GO:0003700;GO:000827	BP:cell differentiation;BP:regulation of transcription, DNA-templated;BP:positive regulation of transcription, DNA-templated;CC:nucleus;MF:sequence-specific DNA binding;MF:transcription factor activity, sequence-specific DNA binding;MF:zinc ion binding;	------	------	------	------	COG5641	K:Transcription	KAF7085300.1	hypothetical protein CFC21_088746 [Triticum aestivum]	sp|Q9FH57|GATA5_ARATH;	GATA transcription factor 5 OS=Arabidopsis thaliana OX=3702 GN=GATA5 PE=2 SV=1;	PF00320.29	GATA	GATA zinc finger
TraesCS6B02G257800	11.0992	21.0217	12.9333	-	GO:0006468;GO:0018105;GO:0035556;GO:0046777;GO:0005737;GO:0005634;GO:0004683;GO:0009931;GO:0004674;GO:0005516;GO:0004672;GO:000552	BP:protein phosphorylation;BP:peptidyl-serine phosphorylation;BP:intracellular signal transduction;BP:protein autophosphorylation;CC:cytoplasm;CC:nucleus;MF:calmodulin-dependent protein kinase activity;MF:calcium-dependent protein serine/threonine kinase activity;MF:protein serine/threonine kinase activity;MF:calmodulin binding;MF:protein kinase activity;MF:ATP binding;	------	------	------	------	ENOG410XRMJ	T:Signal transduction mechanisms	KAF7084959.1	hypothetical protein CFC21_088462 [Triticum aestivum]	sp|Q9SPK4|PPCK1_ARATH;	Phosphoenolpyruvate carboxylase kinase 1 OS=Arabidopsis thaliana OX=3702 GN=PPCK1 PE=1 SV=1;	PF00069.27;PF07714.19	Pkinase;PK_Tyr_Ser-Thr	Protein kinase domain;Protein tyrosine and serine/threonine kinase
TraesCS6B02G217200	16.8558	57.3642	10.7308	-	GO:0006535;GO:0005737;GO:0004124;GO:003017	BP:cysteine biosynthetic process from serine;CC:cytoplasm;MF:cysteine synthase activity;MF:pyridoxal phosphate binding;	K01738	cysK	map00270;map00920	Cysteine and methionine metabolism;Sulfur metabolism	COG0031	E:Amino acid transport and metabolism	XP_037455591.1	cysteine synthase-like isoform X2 [Triticum dicoccoides]	sp|P32260|CYSKP_SPIOL;	Cysteine synthase, chloroplastic/chromoplastic OS=Spinacia oleracea OX=3562 GN=CYSK PE=1 SV=2;	PF00291.27;PF00382.21	PALP;TFIIB	Pyridoxal-phosphate dependent enzyme;Transcription factor TFIIB repeat
TraesCS6B02G198300	3.52583	11.4383	5.25917	-	------	------	------	------	------	------	ENOG4110605;ENOG410Z5C0	S:Function unknown;	EMS65235.1	hypothetical protein TRIUR3_28835 [Triticum urartu]	------	------	------	------	------
TraesCS6B02G198200	14.29	65.425	18.1233	-	------	------	------	------	------	------	ENOG4110605;ENOG410Z5C0	S:Function unknown;	KAF7056831.1	hypothetical protein CFC21_064207 [Triticum aestivum]	------	------	------	------	------
TraesCS6B02G154800	3.34667	4.6	3.43	-	------	------	------	------	------	------	------	------	KAF7083655.1	hypothetical protein CFC21_087423 [Triticum aestivum]	------	------	------	------	------
TraesCS6B02G103800	2.40417	8.64917	4.16083	-	GO:0005975;GO:0050832;GO:0045493;GO:0005576;GO:0004568;GO:000485	BP:carbohydrate metabolic process;BP:defense response to fungus;BP:xylan catabolic process;CC:extracellular region;MF:chitinase activity;MF:enzyme inhibitor activity;	K01183	E3.2.1.14	map00520	Amino sugar and nucleotide sugar metabolism	ENOG4111GPA	G:Carbohydrate transport and metabolism	XP_037445295.1	xylanase inhibitor protein 1-like [Triticum dicoccoides]	sp|Q8L5C6|XIP1_WHEAT;	Xylanase inhibitor protein 1 OS=Triticum aestivum OX=4565 GN=XIPI PE=1 SV=2;	PF00704.30	Glyco_hydro_18	Glycosyl hydrolases family 18
TraesCS6A02G378800	4.7725	20.8458	3.54083	-	GO:0016021;GO:0004497;GO:0016705;GO:0005506;GO:002003	CC:integral component of membrane;MF:monooxygenase activity;MF:oxidoreductase activity, acting on paired donors, with incorporation or reduction of molecular oxygen;MF:iron ion binding;MF:heme binding;	------	------	------	------	COG2124	Q:Secondary metabolites biosynthesis, transport and catabolism	KAF7081245.1	hypothetical protein CFC21_085211 [Triticum aestivum]	sp|Q9LUC5|C7A15_ARATH;	Cytochrome P450 72A15 OS=Arabidopsis thaliana OX=3702 GN=CYP72A15 PE=2 SV=1;	PF00067.24	p450	Cytochrome P450
TraesCS6A02G208300	21.1167	34.4192	18.1025	-	GO:0005634;GO:0005776;GO:0046872;GO:0005515;GO:000827	CC:nucleus;CC:autophagosome;MF:metal ion binding;MF:protein binding;MF:zinc ion binding;	K17987	NBR1	------	------	ENOG411245W	S:Function unknown	VAI46523.1	unnamed protein product [Triticum turgidum subsp. durum]	sp|M1BJF6|JOKA2_SOLTU;	Protein JOKA2 OS=Solanum tuberosum OX=4113 GN=JOKA2 PE=1 SV=1;	PF16158.7;PF00564.26;PF00569.19	N_BRCA1_IG;PB1;ZZ	Ig-like domain from next to BRCA1 gene;PB1 domain;Zinc finger, ZZ type
TraesCS6A02G178000	3.57333	8.46667	4.69667	ADP,ATP carrier protein [Source:UniProtKB/TrEMBL;Acc:W5GDC6]	GO:0006862;GO:0031969;GO:0016021;GO:0005471;GO:000552	BP:nucleotide transport;CC:chloroplast membrane;CC:integral component of membrane;MF:AT;MF:ATP binding;	K03301	TC.AAA	------	------	COG3202	C:Energy production and conversion	XP_037446810.1	plastidic ATP/ADP-transporter-like [Triticum dicoccoides]	sp|Q39002|TLC1_ARATH;	ADP,ATP carrier protein 1, chloroplastic OS=Arabidopsis thaliana OX=3702 GN=AATP1 PE=1 SV=2;	PF03219.16	TLC	TLC ATP/ADP transporter
TraesCS6A02G170000	13.9883	38.5617	17.6117	-	------	------	------	------	------	------	ENOG4110605;ENOG410Z5C0	S:Function unknown;	EMS60941.1	hypothetical protein TRIUR3_22544 [Triticum urartu]	------	------	------	------	------
TraesCS5D02G548400	5.86583	9.42167	5.34667	-	GO:0006952;GO:0005524;GO:004353	BP:defense response;MF:ATP binding;MF:ADP binding;	------	------	------	------	COG4886	S:Function unknown	KAF7076443.1	LOW QUALITY PROTEIN: hypothetical protein CFC21_081095 [Triticum aestivum]	sp|F7J0N2|RGA5R_ORYSJ;	Disease resistance protein RGA5 OS=Oryza sativa subsp. japonica OX=39947 GN=RGA5 PE=1 SV=1;	PF00931.24;PF18052.3;PF13401.8;PF13173.8	NB-ARC;Rx_N;AAA_22;AAA_14	NB-ARC domain;Rx N-terminal domain;AAA domain;AAA domain
TraesCS5D02G389300	2.24167	5.70833	2.59583	-	GO:001602	CC:integral component of membrane;	------	------	------	------	ENOG410YJNN	S:Function unknown	KAF7074568.1	hypothetical protein CFC21_079416 [Triticum aestivum]	------	------	PF03350.18	UPF0114	Uncharacterized protein family, UPF0114
TraesCS5D02G380200	3.52917	10.9225	4.47667	Probable E3 ubiquitin-protein ligase BAH1-like [Source:Projected from Arabidopsis thaliana (AT2G38920) UniProtKB/Swiss-Prot;Acc:Q8GW10]	GO:0016567;GO:004687	BP:protein ubiquitination;MF:metal ion binding;	K16275	BAH, NLA	------	------	ENOG4110S99	O:Posttranslational modification, protein turnover, chaperones	XP_020155669.1	probable E3 ubiquitin-protein ligase BAH1-like 1 isoform X1 [Aegilops tauschii subsp. strangulata]	sp|A2XK56|BAHL1_ORYSI;	Probable E3 ubiquitin-protein ligase BAH1-like 1 OS=Oryza sativa subsp. indica OX=39946 GN=OsI_12825 PE=3 SV=1;	PF03105.21;PF13445.8;PF13920.8;PF14634.8;PF13923.8;PF15227.8;PF13639.8;PF00097.27	SPX;zf-RING_UBOX;zf-C3HC4_3;zf-RING_5;zf-C3HC4_2;zf-C3HC4_4;zf-RING_2;zf-C3HC4	SPX domain;RING-type zinc-finger;Zinc finger, C3HC4 type;zinc-RING finger domain;Zinc finger, C3HC4 type;zinc finger of C3HC4-type, RING;Ring finger domain;Zinc finger, C3HC4 type
TraesCS5D02G304700	6.17417	11.9875	8.72083	-	GO:0006468;GO:0004713;GO:0005524;GO:000467	BP:protein phosphorylation;MF:protein tyrosine kinase activity;MF:ATP binding;MF:protein kinase activity;	K13436	PTI1	map04626	Plant-pathogen interaction	COG0515	T:Signal transduction mechanisms	XP_020188664.1	PTI1-like tyrosine-protein kinase 3 [Aegilops tauschii subsp. strangulata]	sp|Q8H1G6|PTI11_ARATH;	PTI1-like tyrosine-protein kinase 1 OS=Arabidopsis thaliana OX=3702 GN=PTI11 PE=1 SV=1;	PF07714.19;PF00069.27	PK_Tyr_Ser-Thr;Pkinase	Protein tyrosine and serine/threonine kinase;Protein kinase domain
TraesCS5D02G299600	3.36667	7.2275	3.345	-	------	------	------	------	------	------	ENOG410YQFZ;ENOG410Z7Z7	S:Function unknown;	KAF7073507.1	hypothetical protein CFC21_078477 [Triticum aestivum]	sp|Q56XJ7|Y4276_ARATH;	Uncharacterized protein At4g22758 OS=Arabidopsis thaliana OX=3702 GN=At4g22758 PE=2 SV=1;	------	------	------
TraesCS5D02G255700	2.6475	20.0467	2.15417	-	GO:0046658;GO:0016021;GO:000905	CC:anchored component of plasma membrane;CC:integral component of membrane;MF:electron carrier activity;	------	------	------	------	ENOG410YQ18;ENOG411159F;ENOG41107JH	S:Function unknown;	XP_020148004.1	blue copper protein [Aegilops tauschii subsp. strangulata]	sp|Q41001|BCP_PEA;	Blue copper protein OS=Pisum sativum OX=3888 PE=2 SV=1;	PF02298.19	Cu_bind_like	Plastocyanin-like domain
TraesCS5D02G243700	2.98917	12.1325	4.2025	-	GO:1990547;GO:0009651;GO:0035435;GO:0016021;GO:0031305;GO:0005315;GO:000372	BP:mitochondrial phosphate ion transmembrane transport;BP:response to salt stress;BP:phosphate ion transmembrane transport;CC:integral component of membrane;CC:integral component of mitochondrial inner membrane;MF:inorganic phosphate transmembrane transporter activity;MF:mRNA binding;	K15102	SLC25A3, PHC, PIC	------	------	ENOG410XPST	S:Function unknown	XP_020189324.1	mitochondrial phosphate carrier protein 3, mitochondrial [Aegilops tauschii subsp. strangulata]	sp|Q9FMU6|MPCP3_ARATH;	Mitochondrial phosphate carrier protein 3, mitochondrial OS=Arabidopsis thaliana OX=3702 GN=MPT3 PE=1 SV=1;	PF00153.29	Mito_carr	Mitochondrial carrier protein
TraesCS5D02G228900	7.47917	17.22	8.25583	S-adenosylmethionine decarboxylase proenzyme [Source:UniProtKB/TrEMBL;Acc:A0A1D5ZUW9]	GO:0006557;GO:0008295;GO:0006597;GO:0005829;GO:000401	BP:S-adenosylmethioninamine biosynthetic process;BP:spermidine biosynthetic process;BP:spermine biosynthetic process;CC:cytosol;MF:adenosylmethionine decarboxylase activity;	K01611	speD, AMD1	map00270;map00330	Cysteine and methionine metabolism;Arginine and proline metabolism	ENOG410XRN0	E:Amino acid transport and metabolism	XP_020165214.1	S-adenosylmethionine decarboxylase proenzyme [Aegilops tauschii subsp. strangulata]	sp|Q0JC10|DCAM_ORYSJ;	S-adenosylmethionine decarboxylase proenzyme OS=Oryza sativa subsp. japonica OX=39947 GN=SAMDC PE=2 SV=1;	PF01536.18	SAM_decarbox	Adenosylmethionine decarboxylase
TraesCS5D02G222300	13.0983	25.1892	17.2567	-	------	------	------	------	------	------	ENOG410YNP6	S:Function unknown	KAF7072575.1	hypothetical protein CFC21_077684 [Triticum aestivum]	sp|Q8LD26|DRMH3_ARATH;	Dormancy-associated protein homolog 3 OS=Arabidopsis thaliana OX=3702 GN=At1g56220 PE=1 SV=1;	PF05564.14	Auxin_repressed	Dormancy/auxin associated protein
TraesCS5D02G176700	9.03667	40.3025	8.44167	-	GO:0005975;GO:0046658;GO:0016021;GO:0042973;GO:000455	BP:carbohydrate metabolic process;CC:anchored component of plasma membrane;CC:integral component of membrane;MF:glucan endo-1,3-beta-D-glucosidase activity;MF:hydrolase activity, hydrolyzing O-glycosyl compounds;	------	------	------	------	ENOG410Y907	S:Function unknown	XP_020181812.1	glucan endo-1,3-beta-glucosidase 5 [Aegilops tauschii subsp. strangulata]	sp|Q9M088|E135_ARATH;	Glucan endo-1,3-beta-glucosidase 5 OS=Arabidopsis thaliana OX=3702 GN=At4g31140 PE=2 SV=1;	PF00332.20;PF07983.15	Glyco_hydro_17;X8	Glycosyl hydrolases family 17;X8 domain
TraesCS5D02G163400	4.42417	5.92583	3.93583	Autophagy-related protein [Source:UniProtKB/TrEMBL;Acc:A0A341VWJ6]	GO:0006995;GO:0006914;GO:0015031;GO:0000421;GO:0031410;GO:0016020;GO:000587	BP:cellular response to nitrogen starvation;BP:autophagy;BP:protein transport;CC:autophagosome membrane;CC:cytoplasmic vesicle;CC:membrane;CC:microtubule;	K08341	GABARAP, ATG8, LC3	map04136	Autophagy - other	ENOG4111JAT	U:Intracellular trafficking, secretion, and vesicular transport	KAF7071839.1	hypothetical protein CFC21_077081 [Triticum aestivum]	sp|Q2RBS4|ATG8D_ORYSJ;	Autophagy-related protein 8D OS=Oryza sativa subsp. japonica OX=39947 GN=ATG8D PE=3 SV=2;	PF02991.18;PF04110.15	ATG8;APG12	Autophagy protein Atg8 ubiquitin like;Ubiquitin-like autophagy protein Apg12
TraesCS5D02G148800	5.61833	11.8808	4.4625	-	GO:0006355;GO:0005634;GO:000367	BP:regulation of transcription, DNA-templated;CC:nucleus;MF:DNA binding;	------	------	------	------	ENOG410YB53	K:Transcription	XP_020166974.1	NAC transcription factor 29 [Aegilops tauschii subsp. strangulata]	sp|Q9LD44|NAC56_ARATH;	NAC transcription factor 56 OS=Arabidopsis thaliana OX=3702 GN=NAC056 PE=2 SV=1;	PF02365.17	NAM	No apical meristem
TraesCS5D02G138400	2.94667	4.21333	2.76	-	GO:0006468;GO:0009834;GO:0016021;GO:0005886;GO:0005515;GO:0004672;GO:000552	BP:protein phosphorylation;BP:plant-type secondary cell wall biogenesis;CC:integral component of membrane;CC:plasma membrane;MF:protein binding;MF:protein kinase activity;MF:ATP binding;	------	------	------	------	ENOG4111API	T:Signal transduction mechanisms	KAF7071553.1	hypothetical protein CFC21_076838 [Triticum aestivum]	sp|Q9SJQ1|PXC1_ARATH;	Leucine-rich repeat receptor-like protein kinase PXC1 OS=Arabidopsis thaliana OX=3702 GN=PXC1 PE=1 SV=1;	PF00069.27;PF07714.19;PF13855.8;PF12799.9;PF03109.18;PF08263.14	Pkinase;PK_Tyr_Ser-Thr;LRR_8;LRR_4;ABC1;LRRNT_2	Protein kinase domain;Protein tyrosine and serine/threonine kinase;Leucine rich repeat;Leucine Rich repeats;ABC1 atypical kinase-like domain;Leucine rich repeat N-terminal domain
TraesCS5D02G094400	7.49917	33.5425	12.7108	-	------	------	------	------	------	------	ENOG4110893	S:Function unknown	XP_020194042.1	uncharacterized protein LOC109779831 [Aegilops tauschii subsp. strangulata]	------	------	------	------	------
TraesCS5B02G553000	14.755	31.2108	13.7692	-	GO:000905	MF:electron carrier activity;	------	------	------	------	ENOG410YPS7	S:Function unknown	XP_037444537.1	chemocyanin-like [Triticum dicoccoides]	sp|P60496|BABL_LILLO;	Chemocyanin OS=Lilium longiflorum OX=4690 PE=1 SV=1;	PF02298.19	Cu_bind_like	Plastocyanin-like domain
TraesCS5B02G477400	4.59	8.125	4.87333	Histone H2A [Source:UniProtKB/TrEMBL;Acc:A0A1D5Z264]	GO:0005634;GO:0000786;GO:0003677;GO:004698	CC:nucleus;CC:nucleosome;MF:DNA binding;MF:protein heterodimerization activity;	K11251	H2A	------	------	------	------	KAF7068602.1	hypothetical protein CFC21_074341 [Triticum aestivum]	sp|P19177|H2A_PETCR;	Histone H2A OS=Petroselinum crispum OX=4043 PE=2 SV=1;	PF16211.7;PF00125.26	Histone_H2A_C;Histone	C-terminus of histone H2A;Core histone H2A/H2B/H3/H4
TraesCS5B02G470100	4.51833	9.12583	5.66333	-	GO:0006817;GO:0055085;GO:0016021;GO:0015293;GO:0005315;GO:002285	BP:phosphate ion transport;BP:transmembrane transport;CC:integral component of membrane;MF:symporter activity;MF:inorganic phosphate transmembrane transporter activity;MF:transmembrane transporter activity;	K08176	PHO84	------	------	ENOG410ZVN7	G:Carbohydrate transport and metabolism	XP_020175800.1	probable inorganic phosphate transporter 1-8 [Aegilops tauschii subsp. strangulata]	sp|Q8H6G8|PHT18_ORYSJ;	Probable inorganic phosphate transporter 1-8 OS=Oryza sativa subsp. japonica OX=39947 GN=PHT1-8 PE=2 SV=1;	PF00083.26;PF07690.18	Sugar_tr;MFS_1	Sugar;Major Facilitator Superfamily
TraesCS5B02G460900	2.6475	4.71917	3.43167	Hexosyltransferase [Source:UniProtKB/TrEMBL;Acc:A0A341VMM4]	GO:0006486;GO:0016021;GO:0016020;GO:0000139;GO:0030246;GO:001675	BP:protein glycosylation;CC:integral component of membrane;CC:membrane;CC:Golgi membrane;MF:carbohydrate binding;MF:transferase activity, transferring hexosyl groups;	K20843	GALT2S	------	------	ENOG410ZZ1B	S:Function unknown	XP_037442054.1	hydroxyproline O-galactosyltransferase GALT6-like [Triticum dicoccoides]	sp|Q9LV16|B3GTJ_ARATH;	Hydroxyproline O-galactosyltransferase GALT6 OS=Arabidopsis thaliana OX=3702 GN=GALT6 PE=2 SV=2;	PF00337.24;PF01762.23;PF02434.18	Gal-bind_lectin;Galactosyl_T;Fringe	Galactoside-binding lectin;Galactosyltransferase;Fringe-like
TraesCS5B02G458200	7.69667	11.58	7.47333	Histone H2A [Source:UniProtKB/TrEMBL;Acc:W5FCC4]	GO:0005634;GO:0000786;GO:0003677;GO:004698	CC:nucleus;CC:nucleosome;MF:DNA binding;MF:protein heterodimerization activity;	K11251	H2A	------	------	COG5262	B:Chromatin structure and dynamics	KAF7068385.1	hypothetical protein CFC21_074157 [Triticum aestivum]	sp|P40280|H2A_MAIZE;	Histone H2A OS=Zea mays OX=4577 PE=2 SV=1;	PF16211.7;PF00125.26	Histone_H2A_C;Histone	C-terminus of histone H2A;Core histone H2A/H2B/H3/H4
TraesCS5B02G371200	5.085	17.3342	7.42333	Protein DETOXIFICATION [Source:UniProtKB/TrEMBL;Acc:A0A1D5Z3K9]	GO:0055085;GO:0016021;GO:0016020;GO:0015297;GO:0015238;GO:004291	BP:transmembrane transport;CC:integral component of membrane;CC:membrane;MF:antiporter activity;MF:drug transmembrane transporter activity;MF:xenobiotic transporter activity;	K03327	TC.MATE, SLC47A, norM, mdtK, dinF	------	------	COG0534	V:Defense mechanisms	KAF7067423.1	hypothetical protein CFC21_073325 [Triticum aestivum]	sp|Q9FHB6|DTX16_ARATH;	Protein DETOXIFICATION 16 OS=Arabidopsis thaliana OX=3702 GN=DTX16 PE=2 SV=1;	PF01554.20	MatE	MatE
TraesCS5B02G371100	2.25417	6.385	3.665	Protein DETOXIFICATION [Source:UniProtKB/TrEMBL;Acc:A0A341W0X0]	GO:0055085;GO:0016020;GO:0016021;GO:0015297;GO:004291	BP:transmembrane transport;CC:membrane;CC:integral component of membrane;MF:antiporter activity;MF:xenobiotic transporter activity;	K03327	TC.MATE, SLC47A, norM, mdtK, dinF	------	------	COG0534	V:Defense mechanisms	KAF7048961.1	hypothetical protein CFC21_057595 [Triticum aestivum]	sp|Q9FHB6|DTX16_ARATH;	Protein DETOXIFICATION 16 OS=Arabidopsis thaliana OX=3702 GN=DTX16 PE=2 SV=1;	PF01554.20	MatE	MatE
TraesCS5B02G369300	4.44	7.39167	4.495	-	GO:0016021;GO:001678	CC:integral component of membrane;MF:hydrolase activity;	------	------	------	------	ENOG410XT8B	S:Function unknown	KAF7067402.1	hypothetical protein CFC21_073306 [Triticum aestivum]	------	------	PF00149.30	Metallophos	Calcineurin-like phosphoesterase
TraesCS5B02G351200	15.975	46.6758	2.5025	-	GO:004687	MF:metal ion binding;	------	------	------	------	ENOG41105Y4	S:Function unknown	KAF7067210.1	hypothetical protein CFC21_073129 [Triticum aestivum]	------	------	------	------	------
TraesCS5B02G305100	4.4375	9.165	5.4175	Formin-like protein [Source:UniProtKB/TrEMBL;Acc:A0A1D5YYH3]	GO:001602	CC:integral component of membrane;	------	------	------	------	ENOG410XQR0	S:Function unknown	KAF7066681.1	hypothetical protein CFC21_072621 [Triticum aestivum]	sp|Q69MT2|FH15_ORYSJ;	Formin-like protein 15 OS=Oryza sativa subsp. japonica OX=39947 GN=FH15 PE=2 SV=1;	PF02181.25	FH2	Formin Homology 2 Domain
TraesCS5B02G249800	2.8675	5.27333	3.8125	-	GO:0006355;GO:0005634;GO:000367	BP:regulation of transcription, DNA-templated;CC:nucleus;MF:DNA binding;	------	------	------	------	ENOG4110524;ENOG41108M7	S:Function unknown;	XP_037442077.1	dof zinc finger protein MNB1A-like [Triticum dicoccoides]	sp|P38564|MNB1A_MAIZE;	Dof zinc finger protein MNB1A OS=Zea mays OX=4577 GN=MNB1A PE=1 SV=2;	PF02701.17	zf-Dof	Dof domain, zinc finger
TraesCS5B02G246300	3.79333	8.65917	3.93583	-	GO:0046658;GO:0016021;GO:000905	CC:anchored component of plasma membrane;CC:integral component of membrane;MF:electron carrier activity;	------	------	------	------	ENOG410YQ18;ENOG411159F	S:Function unknown;	KAF7065957.1	hypothetical protein CFC21_072021 [Triticum aestivum]	sp|Q41001|BCP_PEA;	Blue copper protein OS=Pisum sativum OX=3888 PE=2 SV=1;	PF02298.19	Cu_bind_like	Plastocyanin-like domain
TraesCS5B02G212300	23.2225	37.9433	25.4658	-	------	------	------	------	------	------	ENOG410YNP6	S:Function unknown	KAF7065562.1	hypothetical protein CFC21_071656 [Triticum aestivum]	sp|Q8LD26|DRMH3_ARATH;	Dormancy-associated protein homolog 3 OS=Arabidopsis thaliana OX=3702 GN=At1g56220 PE=1 SV=1;	PF05564.14	Auxin_repressed	Dormancy/auxin associated protein
TraesCS5B02G198400	3.5625	6.69667	4.765	-	------	------	------	------	------	------	ENOG410YMY7	S:Function unknown	KAF7065392.1	hypothetical protein CFC21_071497 [Triticum aestivum]	------	------	PF14009.8	PADRE	PADRE domain
TraesCS5B02G191400	6.0525	16.0208	8.275	-	GO:001602	CC:integral component of membrane;	------	------	------	------	ENOG4110539	S:Function unknown	KAF7065311.1	hypothetical protein CFC21_071429 [Triticum aestivum]	------	------	PF05553.13	DUF761	Cotton fibre expressed protein
TraesCS5B02G176700	12.1817	19.6092	14.6025	-	GO:0006355;GO:0045893;GO:0005634;GO:0003700;GO:000097	BP:regulation of transcription, DNA-templated;BP:positive regulation of transcription, DNA-templated;CC:nucleus;MF:transcription factor activity, sequence-specific DNA binding;MF:transcription regulatory region sequence-specific DNA binding;	------	------	------	------	ENOG41119H6	K:Transcription	VAI31464.1	unnamed protein product [Triticum turgidum subsp. durum]	------	------	PF00170.23;PF09744.11	bZIP_1;Jnk-SapK_ap_N	bZIP transcription factor;JNK_SAPK-associated protein-1
TraesCS5B02G141400	4.61583	7.85667	2.55333	-	GO:0006355;GO:0005737;GO:0005634;GO:0003700;GO:0000976;GO:004687	BP:regulation of transcription, DNA-templated;CC:cytoplasm;CC:nucleus;MF:transcription factor activity, sequence-specific DNA binding;MF:transcription regulatory region sequence-specific DNA binding;MF:metal ion binding;	------	------	------	------	ENOG410YXCJ	S:Function unknown	XP_020160851.1	mini zinc finger protein 1 [Aegilops tauschii subsp. strangulata]	sp|B8BIU8|MIF1_ORYSI;	Mini zinc finger protein 1 OS=Oryza sativa subsp. indica OX=39946 GN=MIF1 PE=3 SV=1;	PF04770.14	ZF-HD_dimer	ZF-HD protein dimerisation region
TraesCS5B02G139900	2.66083	3.88083	3.33417	-	------	------	------	------	------	------	ENOG410YRPG	S:Function unknown	KAF7064665.1	hypothetical protein CFC21_070928 [Triticum aestivum]	------	------	------	------	------
TraesCS5B02G130800	3.88833	6.7975	3.87917	-	GO:0006468;GO:0009834;GO:0016021;GO:0005886;GO:0005515;GO:0004672;GO:000552	BP:protein phosphorylation;BP:plant-type secondary cell wall biogenesis;CC:integral component of membrane;CC:plasma membrane;MF:protein binding;MF:protein kinase activity;MF:ATP binding;	------	------	------	------	ENOG4111API	T:Signal transduction mechanisms	XP_037440285.1	leucine-rich repeat receptor-like protein kinase PXC1 [Triticum dicoccoides]	sp|Q9SJQ1|PXC1_ARATH;	Leucine-rich repeat receptor-like protein kinase PXC1 OS=Arabidopsis thaliana OX=3702 GN=PXC1 PE=1 SV=1;	PF00069.27;PF07714.19;PF13855.8;PF12799.9;PF03109.18	Pkinase;PK_Tyr_Ser-Thr;LRR_8;LRR_4;ABC1	Protein kinase domain;Protein tyrosine and serine/threonine kinase;Leucine rich repeat;Leucine Rich repeats;ABC1 atypical kinase-like domain
TraesCS5B02G116100	4.61083	6.70833	4.71917	-	GO:0006865;GO:0016021;GO:000588	BP:amino acid transport;CC:integral component of membrane;CC:plasma membrane;	K24917	AAP	------	------	COG0814	E:Amino acid transport and metabolism	XP_037440102.1	amino acid permease 3-like [Triticum dicoccoides]	sp|Q39134|AAP3_ARATH;	Amino acid permease 3 OS=Arabidopsis thaliana OX=3702 GN=AAP3 PE=1 SV=2;	PF01490.20	Aa_trans	Transmembrane amino acid transporter protein
TraesCS5B02G046700	3.9225	5.93833	4.47333	-	GO:000551	MF:protein binding;	------	------	------	------	------	------	XP_037439313.1	uncharacterized protein LOC119307336 [Triticum dicoccoides]	------	------	PF13637.8;PF12796.9;PF13606.8;PF13857.8;PF00023.32	Ank_4;Ank_2;Ank_3;Ank_5;Ank	Ankyrin repeats;Ankyrin repeats;Ankyrin repeat;Ankyrin repeats;Ankyrin repeat
TraesCS5B02G015500	1.90417	30.8025	4.01	-	------	------	------	------	------	------	ENOG4111KEV	S:Function unknown	KAF7063059.1	hypothetical protein CFC21_069590 [Triticum aestivum]	sp|P81370|TLP_ACTDE;	Thaumatin-like protein OS=Actinidia deliciosa OX=3627 GN=tlp PE=1 SV=2;	PF00314.19	Thaumatin	Thaumatin family
TraesCS5A02G557000	11.1983	19.895	14.2275	-	GO:0016021;GO:0004497;GO:0016705;GO:0005506;GO:002003	CC:integral component of membrane;MF:monooxygenase activity;MF:oxidoreductase activity, acting on paired donors, with incorporation or reduction of molecular oxygen;MF:iron ion binding;MF:heme binding;	K09832	CYP710A	map00100	Steroid biosynthesis	COG2124	Q:Secondary metabolites biosynthesis, transport and catabolism	KAF7062858.1	hypothetical protein CFC21_069411 [Triticum aestivum]	sp|O64697|C7101_ARATH;	Cytochrome P450 710A1 OS=Arabidopsis thaliana OX=3702 GN=CYP710A1 PE=1 SV=1;	PF00067.24	p450	Cytochrome P450
TraesCS5A02G516900	8.41333	15.6558	7.8825	-	GO:0030001;GO:004687	BP:metal ion transport;MF:metal ion binding;	------	------	------	------	COG2608	S:Function unknown	XP_020197115.1	heavy metal-associated isoprenylated plant protein 30 [Aegilops tauschii subsp. strangulata]	sp|F4JMB8|HIP44_ARATH;	Heavy metal-associated isoprenylated plant protein 44 OS=Arabidopsis thaliana OX=3702 GN=HIPP44 PE=2 SV=1;	PF00403.28;PF19803.1	HMA;DUF6286	Heavy-metal-associated domain;Family of unknown function
TraesCS5A02G491900	2.5475	7.05583	2.05083	-	GO:001602	CC:integral component of membrane;	------	------	------	------	ENOG410Z5RX	S:Function unknown	XP_037436992.1	uncharacterized protein LOC119303935 [Triticum dicoccoides]	------	------	PF16594.7	ATP-synt_Z	Putative AtpZ or ATP-synthase-associated
TraesCS5A02G488600	3.22583	5.6625	3.795	-	------	------	------	------	------	------	ENOG4112DAU	S:Function unknown	XP_020161852.1	uncharacterized protein LOC109747178 [Aegilops tauschii subsp. strangulata]	------	------	PF05875.14	Ceramidase	Ceramidase
TraesCS5A02G456300	2.10917	7.49	2.70083	-	GO:001602	CC:integral component of membrane;	------	------	------	------	ENOG410YZPN	S:Function unknown	KAF7061682.1	hypothetical protein CFC21_068353 [Triticum aestivum]	------	------	------	------	------
TraesCS5A02G448900	1.90167	6.65667	3.36917	-	------	------	------	------	------	------	ENOG4111VMA	S:Function unknown	XP_037436647.1	actin cytoskeleton-regulatory complex protein pan1-like [Triticum dicoccoides]	------	------	PF04601.15	DUF569	Domain of unknown function
TraesCS5A02G440700	3.105	4.80667	3.475	-	GO:0000162;GO:0006568;GO:0005829;GO:0009507;GO:0003824;GO:000483	BP:tryptophan biosynthetic process;BP:tryptophan metabolic process;CC:cytosol;CC:chloroplast;MF:catalytic activity;MF:tryptophan synthase activity;	K01695	trpA	map00400;map00260	Phenylalanine, tyrosine and tryptophan biosynthesis;Glycine, serine and threonine metabolism	COG0159	E:Amino acid transport and metabolism	XP_037436582.1	tryptophan synthase alpha chain-like [Triticum dicoccoides]	sp|Q42529|TRPA2_ARATH;	Tryptophan synthase alpha chain, chloroplastic OS=Arabidopsis thaliana OX=3702 GN=TSA1 PE=1 SV=1;	PF00290.22;PF00977.23;PF01070.20;PF05690.16;PF01884.19	Trp_syntA;His_biosynth;FMN_dh;ThiG;PcrB	Tryptophan synthase alpha chain;Histidine biosynthesis protein;FMN-dependent dehydrogenase;Thiazole biosynthesis protein ThiG;PcrB family
TraesCS5A02G427500	3.14833	5.66917	4.52167	-	GO:0010082;GO:0010081;GO:0010080;GO:0009793;GO:0010305;GO:0009908;GO:0009640;GO:0016021;GO:0008235;GO:0004181;GO:000418	BP:regulation of root meristem growth;BP:regulation of inflorescence meristem growth;BP:regulation of floral meristem growth;BP:embryo development ending in seed dormancy;BP:leaf vascular tissue pattern formation;BP:flower development;BP:photomorphogenesis;CC:integral component of membrane;MF:metalloexopeptidase activity;MF:metallocarboxypeptidase activity;MF:carboxypeptidase activity;	K01301	NAALAD	------	------	COG2234	S:Function unknown	KAF7061376.1	hypothetical protein CFC21_068075 [Triticum aestivum]	sp|Q852M4|PLAT3_ORYSJ;	Probable glutamate carboxypeptidase PLA3 OS=Oryza sativa subsp. japonica OX=39947 GN=PLA3 PE=1 SV=2;	PF04253.17;PF04389.19	TFR_dimer;Peptidase_M28	Transferrin receptor-like dimerisation domain;Peptidase family M28
TraesCS5A02G412200	3.275	6.495	3.50917	-	GO:001602	CC:integral component of membrane;	------	------	------	------	ENOG410XSRE	S:Function unknown	KAF7061204.1	hypothetical protein CFC21_067917 [Triticum aestivum]	------	------	PF06364.14	DUF1068	Protein of unknown function
TraesCS5A02G411600	2.12083	4.99917	3.12083	-	GO:0006811;GO:0031146;GO:0016021;GO:000484	BP:ion transport;BP:SCF-dependent proteasomal ubiquitin-dependent protein catabolic process;CC:integral component of membrane;MF:ubiquitin-protein transferase activity;	------	------	------	------	ENOG410YUKC	S:Function unknown	XP_037431483.1	uncharacterized protein LOC119298048 [Triticum dicoccoides]	------	------	------	------	------
TraesCS5A02G410700	2.61083	3.6625	3.3375	-	GO:000438	MF:helicase activity;	------	------	------	------	COG1112	L:Replication, recombination and repair	KAF7061184.1	hypothetical protein CFC21_067900 [Triticum aestivum]	sp|B6SFA4|MAA3_ARATH;	Probable helicase MAGATAMA 3 OS=Arabidopsis thaliana OX=3702 GN=MAA3 PE=2 SV=1;	PF13087.8	AAA_12	AAA domain
TraesCS5A02G375700	4.26083	7.94917	4.51083	-	GO:000563	CC:nucleus;	------	------	------	------	ENOG4111I0K	S:Function unknown	XP_037436006.1	IQ domain-containing protein IQM6-like [Triticum dicoccoides]	sp|Q9LHN9|IQM2_ARATH;	IQ domain-containing protein IQM2 OS=Arabidopsis thaliana OX=3702 GN=IQM2 PE=2 SV=1;	------	------	------
TraesCS5A02G321600	5.86417	7.805	4.74083	-	GO:0006099;GO:0005743;GO:0016021;GO:004527	BP:tricarboxylic acid cycle;CC:mitochondrial inner membrane;CC:integral component of membrane;CC:respiratory chain complex II;	------	------	------	------	ENOG41119ZB	S:Function unknown	XP_037435548.1	succinate dehydrogenase subunit 8A, mitochondrial-like [Triticum dicoccoides]	sp|Q0DF13|SDH8A_ORYSJ;	Succinate dehydrogenase subunit 8A, mitochondrial OS=Oryza sativa subsp. japonica OX=39947 GN=SDH8A PE=3 SV=2;	------	------	------
TraesCS5A02G277100	2.945	3.72333	3.09083	-	GO:0016021;GO:000574	CC:integral component of membrane;CC:mitochondrial respiratory chain complex II, succinate dehydrogenase comple;	------	------	------	------	ENOG410XWZS	S:Function unknown	KAF7059638.1	hypothetical protein CFC21_066508 [Triticum aestivum]	sp|Q6ZCC4|SDH6_ORYSJ;	Succinate dehydrogenase subunit 6, mitochondrial OS=Oryza sativa subsp. japonica OX=39947 GN=SDH6 PE=1 SV=1;	------	------	------
TraesCS5A02G242300	7.9825	16.6008	6.89417	-	GO:001678	MF:hydrolase activity;	------	------	------	------	COG0657	I:Lipid transport and metabolism	KAF7059230.1	hypothetical protein CFC21_066160 [Triticum aestivum]	sp|I4DST8|TCEA1_TULGE;	Tuliposide A-converting enzyme 1, chloroplastic OS=Tulipa gesneriana OX=13306 GN=TCEA1 PE=1 SV=1;	PF07859.15;PF00135.30;PF12740.9	Abhydrolase_3;COesterase;Chlorophyllase2	alpha/beta hydrolase fold;Carboxylesterase family;Chlorophyllase enzyme
TraesCS5A02G202800	6.3875	11.345	6.42833	-	GO:0046856;GO:0016787;GO:0016791;GO:0004439;GO:0034485;GO:000382	BP:phosphatidylinositol dephosphorylation;MF:hydrolase activity;MF:phosphatase activity;MF:phosphatidylinositol-4,5-bisphosphate 5-phosphatase activity;MF:phosphatidylinositol-3,4,5-trisphosphate 5-phosphatase activity;MF:catalytic activity;	------	------	------	------	COG5411	T:Signal transduction mechanisms	XP_037434358.1	type IV inositol polyphosphate 5-phosphatase 9-like isoform X2 [Triticum dicoccoides]	sp|Q9SIS4|IP5P9_ARATH;	Type IV inositol polyphosphate 5-phosphatase 9 OS=Arabidopsis thaliana OX=3702 GN=IP5P9 PE=1 SV=1;	PF03372.25	Exo_endo_phos	Endonuclease/Exonuclease/phosphatase family
TraesCS5A02G191800	3.14	6.04917	3.28083	-	GO:001602	CC:integral component of membrane;	------	------	------	------	ENOG4110539	S:Function unknown	KAF7058675.1	hypothetical protein CFC21_065683 [Triticum aestivum]	------	------	PF05553.13	DUF761	Cotton fibre expressed protein
TraesCS5A02G172000	3.46833	4.15083	3.42333	-	------	------	------	------	------	------	ENOG411043F	S:Function unknown	XP_037427916.1	uncharacterized protein LOC119293607 [Triticum dicoccoides]	------	------	------	------	------
TraesCS5A02G171900	4.90833	10.495	4.84333	-	GO:0005975;GO:0046658;GO:0016021;GO:0042973;GO:000455	BP:carbohydrate metabolic process;CC:anchored component of plasma membrane;CC:integral component of membrane;MF:glucan endo-1,3-beta-D-glucosidase activity;MF:hydrolase activity, hydrolyzing O-glycosyl compounds;	------	------	------	------	ENOG410Y907	S:Function unknown	XP_037433987.1	glucan endo-1,3-beta-glucosidase 5-like [Triticum dicoccoides]	sp|Q9M088|E135_ARATH;	Glucan endo-1,3-beta-glucosidase 5 OS=Arabidopsis thaliana OX=3702 GN=At4g31140 PE=2 SV=1;	PF00332.20;PF07983.15	Glyco_hydro_17;X8	Glycosyl hydrolases family 17;X8 domain
TraesCS5A02G063100	5.49333	12.265	7.32417	HVA22-like protein [Source:UniProtKB/TrEMBL;Acc:A0A1D5YVN8]	GO:001602	CC:integral component of membrane;	K17279	REEP5_6	------	------	COG5052	U:Intracellular trafficking, secretion, and vesicular transport	XP_037432510.1	HVA22-like protein e [Triticum dicoccoides]	sp|Q07764|HVA22_HORVU;	Protein HVA22 OS=Hordeum vulgare OX=4513 GN=HVA22 PE=2 SV=1;	PF03134.21	TB2_DP1_HVA22	TB2/DP1, HVA22 family
TraesCS5A02G022100	3.69917	6.08833	4.06083	-	GO:0030154;GO:0006355;GO:0005634;GO:0043565;GO:0003700;GO:000827	BP:cell differentiation;BP:regulation of transcription, DNA-templated;CC:nucleus;MF:sequence-specific DNA binding;MF:transcription factor activity, sequence-specific DNA binding;MF:zinc ion binding;	------	------	------	------	COG5641	K:Transcription	KAF7056560.1	hypothetical protein CFC21_063957 [Triticum aestivum]	sp|O49743|GATA4_ARATH;	GATA transcription factor 4 OS=Arabidopsis thaliana OX=3702 GN=GATA4 PE=2 SV=1;	PF00320.29	GATA	GATA zinc finger
TraesCS4D02G351800	5.27917	8.92583	4.09667	-	GO:001649	MF:oxidoreductase activity;	------	------	------	------	COG1028	S:Function unknown	KAF7056131.1	hypothetical protein CFC21_063569 [Triticum aestivum]	sp|A0A078ISJ6|TC32B_BRANA;	Short-chain dehydrogenase TIC 32 B, chloroplastic OS=Brassica napus OX=3708 GN=TIC32B PE=3 SV=1;	PF00106.27;PF13561.8;PF08659.12;PF01370.23	adh_short;adh_short_C2;KR;Epimerase	short chain dehydrogenase;Enoyl;KR domain;NAD dependent epimerase/dehydratase family
TraesCS4D02G351700	3.27	17.8467	3.6075	-	GO:001649	MF:oxidoreductase activity;	------	------	------	------	COG1028	S:Function unknown	KAF7056127.1	hypothetical protein CFC21_063565 [Triticum aestivum]	sp|A0A078ISJ6|TC32B_BRANA;	Short-chain dehydrogenase TIC 32 B, chloroplastic OS=Brassica napus OX=3708 GN=TIC32B PE=3 SV=1;	PF00106.27;PF13561.8;PF08659.12;PF01370.23	adh_short;adh_short_C2;KR;Epimerase	short chain dehydrogenase;Enoyl;KR domain;NAD dependent epimerase/dehydratase family
TraesCS4D02G316600	7.58	16.3683	6.69083	-	GO:001602	CC:integral component of membrane;	------	------	------	------	ENOG410Z5RX	S:Function unknown	XP_020186441.1	uncharacterized protein LOC109772159 [Aegilops tauschii subsp. strangulata]	------	------	PF16594.7	ATP-synt_Z	Putative AtpZ or ATP-synthase-associated
TraesCS4D02G301900	6.27083	14.0925	5.17083	FIP1 [Source:Projected from Arabidopsis thaliana (AT1G28200) UniProtKB/TrEMBL;Acc:A0A178WL22]	------	------	------	------	------	------	ENOG410YBXM	S:Function unknown	KAF7055542.1	hypothetical protein CFC21_063055 [Triticum aestivum]	sp|Q8S8F8|GEM_ARATH;	GLABRA2 expression modulator OS=Arabidopsis thaliana OX=3702 GN=GEM PE=1 SV=1;	PF02893.22	GRAM	GRAM domain
TraesCS4D02G291700	3.4	5.425	3.9425	-	GO:000808	MF:N-acetyltransferase activity;	------	------	------	------	ENOG4111YE4	S:Function unknown	KAF7055441.1	hypothetical protein CFC21_062967 [Triticum aestivum]	------	------	PF00583.27;PF13673.9;PF08445.12;PF13508.9;PF13302.9	Acetyltransf_1;Acetyltransf_10;FR47;Acetyltransf_7;Acetyltransf_3	Acetyltransferase;Acetyltransferase;FR47-like protein;Acetyltransferase;Acetyltransferase
TraesCS4D02G288800	2.95667	4.02667	2.72167	-	GO:0034553;GO:000573	BP:mitochondrial respiratory chain complex II assembly;CC:mitochondrion;	K18167	SDHAF1	------	------	ENOG41125QX	S:Function unknown	XP_020187105.1	succinate dehydrogenase assembly factor 1, mitochondrial [Aegilops tauschii subsp. strangulata]	sp|B0K036|SDHF1_RAT;	Succinate dehydrogenase assembly factor 1, mitochondrial OS=Rattus norvegicus OX=10116 GN=Sdhaf1 PE=3 SV=1;	PF05347.17	Complex1_LYR	Complex 1 protein
TraesCS4D02G285000	2.96167	3.81667	2.81333	-	GO:0006412;GO:0009507;GO:0005840;GO:0003735;GO:000809	BP:translation;CC:chloroplast;CC:ribosome;MF:structural constituent of ribosome;MF:5S rRNA binding;	------	------	------	------	COG5560;ENOG410Y2MQ	O:Posttranslational modification, protein turnover, chaperones;S:Function unknown	XP_020152808.1	50S ribosomal protein L18 isoform X2 [Aegilops tauschii subsp. strangulata]	sp|P82195|RK18_SPIOL;	50S ribosomal protein L18, chloroplastic OS=Spinacia oleracea OX=3562 GN=RPL18 PE=1 SV=3;	PF00861.24	Ribosomal_L18p	Ribosomal L18 of archaea, bacteria, mitoch. and chloroplast
TraesCS4D02G250800	3.53583	10.3192	2.65083	-	------	------	------	------	------	------	ENOG410Z0US	S:Function unknown	XP_020198812.1	remorin 1.4 isoform X1 [Aegilops tauschii subsp. strangulata]	------	------	PF03763.15	Remorin_C	Remorin, C-terminal region
TraesCS4D02G248000	4.52583	12.7867	7.30333	-	GO:0005975;GO:0009536;GO:0005576;GO:0080079;GO:0080083;GO:0016798;GO:0008422;GO:0102483;GO:0004565;GO:0033907;GO:0004553;GO:0102726;GO:004297	BP:carbohydrate metabolic process;CC:plastid;CC:extracellular region;MF:cellobiose glucosidase activity;MF:beta-gentiobiose beta-glucosidase activity;MF:hydrolase activity, acting on glycosyl bonds;MF:beta-glucosidase activity;MF:scopolin beta-glucosidase activity;MF:beta-galactosidase activity;MF:beta-D-fucosidase activity;MF:hydrolase activity, hydrolyzing O-glycosyl compounds;MF:DIMBOA glucosi…	K01188	E3.2.1.21	map00460;map00940;map00500	Cyanoamino acid metabolism;Phenylpropanoid biosynthesis;Starch and sucrose metabolism	COG2723	G:Carbohydrate transport and metabolism	XP_020146400.1	beta-glucosidase 6 isoform X2 [Aegilops tauschii subsp. strangulata]	sp|Q8L7J2|BGL06_ORYSJ;	Beta-glucosidase 6 OS=Oryza sativa subsp. japonica OX=39947 GN=BGLU6 PE=1 SV=1;	PF00232.20;PF00150.20	Glyco_hydro_1;Cellulase	Glycosyl hydrolase family 1;Cellulase
TraesCS4D02G236400	7.14	15.2558	6.24833	Poly [ADP-ribose] polymerase [Source:UniProtKB/TrEMBL;Acc:A0A1D5XZC3]	GO:000395	MF:NAD+ ADP-ribosyltransferase activity;	------	------	------	------	ENOG4111NY1	S:Function unknown	XP_020173089.1	probable inactive poly [ADP-ribose] polymerase SRO3 [Aegilops tauschii subsp. strangulata]	sp|Q8RY59|RCD1_ARATH;	Inactive poly [ADP-ribose] polymerase RCD1 OS=Arabidopsis thaliana OX=3702 GN=RCD1 PE=1 SV=1;	PF12174.10;PF00644.22	RST;PARP	RCD1-SRO-TAF4;Pol
TraesCS4D02G177600	11.4967	26.6192	8.5625	-	------	------	K23538	ELMOD	------	------	ENOG410XRXC	S:Function unknown	XP_020198084.2	uncharacterized protein LOC109783911 [Aegilops tauschii subsp. strangulata]	sp|Q54YW1|ELMOA_DICDI;	ELMO domain-containing protein A OS=Dictyostelium discoideum OX=44689 GN=elmoA PE=1 SV=1;	PF04727.15	ELMO_CED12	ELMO/CED-12 family
TraesCS4D02G142300	7.14083	13.9408	10.315	-	GO:0006355;GO:0005634;GO:0003700;GO:0043565;GO:000367	BP:regulation of transcription, DNA-templated;CC:nucleus;MF:transcription factor activity, sequence-specific DNA binding;MF:sequence-specific DNA binding;MF:DNA binding;	K09422	MYBP	------	------	COG5147	K:Transcription	XP_020156608.1	myb-related protein MYBAS1 [Aegilops tauschii subsp. strangulata]	sp|Q53NK6|MYBA1_ORYSJ;	Myb-related protein MYBAS1 OS=Oryza sativa subsp. japonica OX=39947 GN=MYBAS1 PE=2 SV=1;	PF00249.33;PF13921.8	Myb_DNA-binding;Myb_DNA-bind_6	Myb-like DNA-binding domain;Myb-like DNA-binding domain
TraesCS4D02G074900	5.35833	12.1675	5.5775	-	GO:0015853;GO:0006863;GO:0015854;GO:0055085;GO:0016021;GO:0016020;GO:0005886;GO:0005345;GO:002285	BP:adenine transport;BP:purine nucleobase transport;BP:guanine transport;BP:transmembrane transport;CC:integral component of membrane;CC:membrane;CC:plasma membrane;MF:purine nucleobase transmembrane transporter activity;MF:transmembrane transporter activity;	K06901	pbuG, azgA, ghxP, ghxQ, adeQ	------	------	COG2252	S:Function unknown	XP_020169669.1	adenine/guanine permease AZG2 [Aegilops tauschii subsp. strangulata]	sp|Q84MA8|AZG2_ARATH;	Adenine/guanine permease AZG2 OS=Arabidopsis thaliana OX=3702 GN=AZG2 PE=2 SV=1;	PF00860.22	Xan_ur_permease	Permease family
TraesCS4D02G056400	15.9458	67.275	32.365	-	GO:004742	MF:nucleoside-triphosphate diphosphatase activity;	K06287	maf	------	------	COG0424	D:Cell cycle control, cell division, chromosome partitioning	KAF7052455.1	hypothetical protein CFC21_060549 [Triticum aestivum]	sp|Q54TC5|NTPPB_DICDI;	7-methyl-GTP pyrophosphatase OS=Dictyostelium discoideum OX=44689 GN=DDB_G0281937 PE=3 SV=1;	PF02545.16	Maf	Maf-like protein
TraesCS4D02G054000	2.41083	4.42917	2.845	-	GO:0006355;GO:0005634;GO:0003700;GO:004356	BP:regulation of transcription, DNA-templated;CC:nucleus;MF:transcription factor activity, sequence-specific DNA binding;MF:sequence-specific DNA binding;	------	------	------	------	ENOG410YBEM	K:Transcription	KAF7052429.1	hypothetical protein CFC21_060524 [Triticum aestivum]	sp|Q53K16|SCL7_ORYSJ;	SCARECROW-LIKE protein 7 OS=Oryza sativa subsp. japonica OX=39947 GN=SCL7 PE=1 SV=1;	PF03514.16	GRAS	GRAS domain family
TraesCS4D02G036000	4.0625	7.2675	5.1575	-	GO:0030001;GO:0009873;GO:0016021;GO:0016020;GO:0005622;GO:004687	BP:metal ion transport;BP:ethylene-activated signaling pathway;CC:integral component of membrane;CC:membrane;CC:intracellular;MF:metal ion transmembrane transporter activity;	K14513	EIN2	map04016;map04075	MAPK signaling pathway - plant;Plant hormone signal transduction	COG1914	P:Inorganic ion transport and metabolism	KAF7052192.1	hypothetical protein CFC21_060322 [Triticum aestivum]	sp|Q0D8I9|EIN2_ORYSJ;	Protein ETHYLENE-INSENSITIVE 2 OS=Oryza sativa subsp. japonica OX=39947 GN=EIN2 PE=2 SV=1;	PF01566.20	Nramp	Natural resistance-associated macrophage protein
TraesCS4D02G000700	4.08417	6.70333	5.245	-	GO:001602	CC:integral component of membrane;	------	------	------	------	COG2074	G:Carbohydrate transport and metabolism	KAF7051779.1	hypothetical protein CFC21_059981 [Triticum aestivum]	sp|Q651A1|LPA1H_ORYSJ;	P-loop NTPase domain-containing protein LPA1 homolog OS=Oryza sativa subsp. japonica OX=39947 GN=Os09g0572200 PE=3 SV=1;	PF13671.8;PF13238.8	AAA_33;AAA_18	AAA domain;AAA domain
TraesCS4B02G358500	5.54333	11.1592	4.68833	-	GO:001649	MF:oxidoreductase activity;	------	------	------	------	COG1028	S:Function unknown	KAF7051286.1	hypothetical protein CFC21_059538 [Triticum aestivum]	sp|A0A078ISJ6|TC32B_BRANA;	Short-chain dehydrogenase TIC 32 B, chloroplastic OS=Brassica napus OX=3708 GN=TIC32B PE=3 SV=1;	PF00106.27;PF13561.8;PF08659.12;PF01370.23	adh_short;adh_short_C2;KR;Epimerase	short chain dehydrogenase;Enoyl;KR domain;NAD dependent epimerase/dehydratase family
TraesCS4B02G349400	4.025	7.9625	4.43167	-	------	------	------	------	------	------	ENOG410YR1T	S:Function unknown	KAF7051171.1	hypothetical protein CFC21_059440 [Triticum aestivum]	------	------	------	------	------
TraesCS4B02G347800	3.18417	6.6825	3.97417	-	GO:001602	CC:integral component of membrane;	------	------	------	------	COG0398	S:Function unknown	KAF7051154.1	hypothetical protein CFC21_059424 [Triticum aestivum]	sp|Q55909|Y305_SYNY3;	TVP38/TMEM64 family membrane protein slr0305 OS=Synechocystis sp.;	PF09335.13	SNARE_assoc	SNARE associated Golgi protein
TraesCS4B02G307300	2.8825	21.4875	3.86417	-	GO:0006606;GO:0006412;GO:0005737;GO:0005840;GO:0005634;GO:0005654;GO:0005739;GO:0009507;GO:0003735;GO:0008139;GO:0061608;GO:0019843;GO:003126	BP:protein import into nucleus;BP:translation;CC:cytoplasm;CC:ribosome;CC:nucleus;CC:nucleoplasm;CC:mitochondrion;CC:chloroplast;MF:structural constituent of ribosome;MF:nuclear localization sequence binding;MF:nuclear import signal receptor activity;MF:rRNA binding;MF:small GTPase binding;	K18752	TNPO1, IPO2, KPNB2	map03013	Nucleocytoplasmic transport	ENOG410XPK2	U:Intracellular trafficking, secretion, and vesicular transport	VAI09781.1	unnamed protein product [Triticum turgidum subsp. durum]	sp|B8ARW2|TNPO1_ORYSI;	Transportin-1 OS=Oryza sativa subsp. indica OX=39946 GN=OsI_18044 PE=2 SV=1;	------	------	------
TraesCS4B02G303500	3.895	7.27333	3.52083	FIP1 [Source:Projected from Arabidopsis thaliana (AT1G28200) UniProtKB/TrEMBL;Acc:A0A178WL22]	------	------	------	------	------	------	ENOG410YBXM	S:Function unknown	XP_037427447.1	GEM-like protein 1, partial [Triticum dicoccoides]	sp|Q9SE96|GEML1_ARATH;	GEM-like protein 1 OS=Arabidopsis thaliana OX=3702 GN=FIP1 PE=1 SV=1;	PF02893.22	GRAM	GRAM domain
TraesCS4B02G301400	2.875	6.51917	3.81083	-	GO:0006355;GO:0006351;GO:0005634;GO:000367	BP:regulation of transcription, DNA-templated;BP:transcription, DNA-templated;CC:nucleus;MF:DNA binding;	------	------	------	------	ENOG4111SA1	K:Transcription	KAF7050630.1	hypothetical protein CFC21_058967 [Triticum aestivum]	sp|Q10QS9|Y3845_ORYSJ;	B3 domain-containing protein Os03g0184500 OS=Oryza sativa subsp. japonica OX=39947 GN=Os03g0184500 PE=2 SV=1;	PF02362.23	B3	B3 DNA binding domain
TraesCS4B02G290400	7.54917	15.355	8.89167	CCAAT-binding transcription factor B [Source:UniProtKB/TrEMBL;Acc:Q6Q1C7]	GO:0006355;GO:0006357;GO:0016602;GO:0005634;GO:0003700;GO:0003677;GO:0000978;GO:000098	BP:regulation of transcription, DNA-templated;BP:regulation of transcription from RNA polymerase II promoter;CC:CCAAT-binding factor complex;CC:nucleus;MF:transcription factor activity, sequence-specific DNA binding;MF:DNA binding;MF:RNA polymerase II core promoter proximal region sequence-specific DNA binding;MF:RNA polymerase II transcription factor activity, sequence-specific DNA binding;	K08064	NFYA, HAP2	------	------	COG5224	K:Transcription	XP_037426273.1	nuclear transcription factor Y subunit A-7-like [Triticum dicoccoides]	sp|Q945M9|NFYA9_ARATH;	Nuclear transcription factor Y subunit A-9 OS=Arabidopsis thaliana OX=3702 GN=NFYA9 PE=1 SV=1;	PF02045.17	CBFB_NFYA	CCAAT-binding transcription factor
TraesCS4B02G261600	10.1458	22.5983	13.0933	Homeodomain-leucine zipper transcription factor, Regulation of panicle exsertio [Source: Projected from Oryza sativa (Os03g0198600)]	GO:0006355;GO:0045893;GO:0005634;GO:0043565;GO:0003677;GO:000098	BP:regulation of transcription, DNA-templated;BP:positive regulation of transcription, DNA-templated;CC:nucleus;MF:sequence-specific DNA binding;MF:DNA binding;MF:RNA polymerase II transcription factor activity, sequence-specific DNA binding;	K09338	HD-ZIP	------	------	ENOG410Z2UE	K:Transcription	XP_037425996.1	homeobox-leucine zipper protein HOX12-like [Triticum dicoccoides]	sp|Q10QF2|HOX12_ORYSJ;	Homeobox-leucine zipper protein HOX12 OS=Oryza sativa subsp. japonica OX=39947 GN=HOX12 PE=2 SV=1;	PF00046.31;PF05920.13	Homeodomain;Homeobox_KN	Homeodomain;Homeobox KN domain
TraesCS4B02G250900	3.64583	9.0825	2.82417	-	------	------	------	------	------	------	ENOG410Z0US	S:Function unknown	KAF7050066.1	hypothetical protein CFC21_058479 [Triticum aestivum]	------	------	PF03763.15	Remorin_C	Remorin, C-terminal region
TraesCS4B02G235000	7.3025	13.5258	7.03083	Poly [ADP-ribose] polymerase [Source:UniProtKB/TrEMBL;Acc:W5E4H5]	GO:000395	MF:NAD+ ADP-ribosyltransferase activity;	------	------	------	------	ENOG4111NY1	S:Function unknown	XP_037425717.1	probable inactive poly [ADP-ribose] polymerase SRO3 [Triticum dicoccoides]	sp|Q8RY59|RCD1_ARATH;	Inactive poly [ADP-ribose] polymerase RCD1 OS=Arabidopsis thaliana OX=3702 GN=RCD1 PE=1 SV=1;	PF12174.10;PF00644.22	RST;PARP	RCD1-SRO-TAF4;Pol
TraesCS4B02G229200	3.19083	4.33667	2.885	-	GO:000367	MF:nucleic acid binding;	------	------	------	------	ENOG410ZCT7	S:Function unknown	XP_037425653.1	zinc finger protein 7-like [Triticum dicoccoides]	sp|Q39263|ZFP4_ARATH;	Zinc finger protein 4 OS=Arabidopsis thaliana OX=3702 GN=ZFP4 PE=2 SV=2;	PF13912.8	zf-C2H2_6	C2H2-type zinc finger
TraesCS4B02G194200	8.08333	11.4575	9.4	-	------	------	------	------	------	------	------	------	KAF7049374.1	hypothetical protein CFC21_057925 [Triticum aestivum]	------	------	------	------	------
TraesCS4B02G187800	26.0692	69.6083	29.6175	-	GO:0009607;GO:0009738;GO:0006952;GO:0080163;GO:0005737;GO:0005634;GO:0004864;GO:0038023;GO:001042	BP:response to biotic stimulus;BP:abscisic acid-activated signaling pathway;BP:defense response;BP:regulation of protein serine/threonine phosphatase activity;CC:cytoplasm;CC:nucleus;MF:protein phosphatase inhibitor activity;MF:signaling receptor activity;MF:abscisic acid binding;	------	------	------	------	ENOG410YZ38	S:Function unknown	KAF7049301.1	hypothetical protein CFC21_057861 [Triticum aestivum]	sp|Q05736|PR1_ASPOF;	Pathogenesis-related protein 1 OS=Asparagus officinalis OX=4686 GN=PR1 PE=2 SV=1;	PF00407.21	Bet_v_1	Pathogenesis-related protein Bet v 1 family
TraesCS4B02G175700	8.91	27.9133	7.9625	-	------	------	K23538	ELMOD	------	------	ENOG410XRXC	S:Function unknown	VAI06147.1	unnamed protein product [Triticum turgidum subsp. durum]	sp|Q54YW1|ELMOA_DICDI;	ELMO domain-containing protein A OS=Dictyostelium discoideum OX=44689 GN=elmoA PE=1 SV=1;	PF04727.15	ELMO_CED12	ELMO/CED-12 family
TraesCS4B02G125700	2.49667	4.91083	2.36583	Similar to Na+/H+ antiporter [Source: Projected from Oryza sativa (Os11g0648000)]	GO:0098719;GO:0071805;GO:0006812;GO:0006885;GO:0051453;GO:0055085;GO:0009941;GO:0016021;GO:0005886;GO:0015299;GO:0015386;GO:001538	BP:sodium ion import across plasma membrane;BP:potassium ion transmembrane transport;BP:cation transport;BP:regulation of pH;BP:regulation of intracellular pH;BP:transmembrane transport;CC:chloroplast envelope;CC:integral component of membrane;CC:plasma membrane;MF:solut;MF:potassiu;MF:sodiu;	------	------	------	------	COG0025	P:Inorganic ion transport and metabolism	KAF7048429.1	hypothetical protein CFC21_057202 [Triticum aestivum]	sp|Q56XP4|NHX2_ARATH;	Sodium/hydrogen exchanger 2 OS=Arabidopsis thaliana OX=3702 GN=NHX2 PE=2 SV=2;	PF00999.23	Na_H_Exchanger	Sodium/hydrogen exchanger family
TraesCS4B02G104500	2.90083	18.87	4.93833	Endoglucanase [Source:UniProtKB/TrEMBL;Acc:W5ECU7]	GO:0005975;GO:0030245;GO:0016021;GO:0005576;GO:0008810;GO:0030246;GO:000455	BP:carbohydrate metabolic process;BP:cellulose catabolic process;CC:integral component of membrane;CC:extracellular region;MF:cellulase activity;MF:carbohydrate binding;MF:hydrolase activity, hydrolyzing O-glycosyl compounds;	K01179	E3.2.1.4	map00500	Starch and sucrose metabolism	ENOG410XPC9	G:Carbohydrate transport and metabolism	XP_037429635.1	endoglucanase 15-like [Triticum dicoccoides]	sp|Q6L4I2|GUN15_ORYSJ;	Endoglucanase 15 OS=Oryza sativa subsp. japonica OX=39947 GN=Os05g0212300 PE=2 SV=1;	PF00759.21;PF09478.12	Glyco_hydro_9;CBM49	Glycosyl hydrolase family 9;Carbohydrate binding domain CBM49
TraesCS4B02G076400	2.50583	5.955	2.1725	-	GO:0015853;GO:0006863;GO:0015854;GO:0055085;GO:0016021;GO:0016020;GO:0005886;GO:0005345;GO:002285	BP:adenine transport;BP:purine nucleobase transport;BP:guanine transport;BP:transmembrane transport;CC:integral component of membrane;CC:membrane;CC:plasma membrane;MF:purine nucleobase transmembrane transporter activity;MF:transmembrane transporter activity;	K06901	pbuG, azgA, ghxP, ghxQ, adeQ	------	------	COG2252	S:Function unknown	VAI02494.1	unnamed protein product [Triticum turgidum subsp. durum]	sp|Q84MA8|AZG2_ARATH;	Adenine/guanine permease AZG2 OS=Arabidopsis thaliana OX=3702 GN=AZG2 PE=2 SV=1;	PF00860.22	Xan_ur_permease	Permease family
TraesCS4B02G059100	3.02333	20.0467	7.20167	-	GO:0006749;GO:0005737;GO:0004364;GO:0005515;GO:004329	BP:glutathione metabolic process;CC:cytoplasm;MF:glutathione transferase activity;MF:protein binding;MF:glutathione binding;	K00799	GST, gst	map00480	Glutathione metabolism	------	------	KAF7047653.1	hypothetical protein CFC21_056547 [Triticum aestivum]	sp|P30111|GSTF2_WHEAT;	Glutathione S-transferase 2 OS=Triticum aestivum OX=4565 GN=GSTA2 PE=3 SV=1;	PF00043.27;PF02798.22;PF13410.8;PF14497.8;PF13417.8;PF13409.8	GST_C;GST_N;GST_C_2;GST_C_3;GST_N_3;GST_N_2	Glutathione S-transferase, C-terminal domain;Glutathione S-transferase, N-terminal domain;Glutathione S-transferase, C-terminal domain;Glutathione S-transferase, C-terminal domain;Glutathione S-transferase, N-terminal domain;Glutathione S-transferase, N-terminal domain
TraesCS4A02G404800	4.01083	18.3733	4.06083	-	------	------	------	------	------	------	------	------	KXG40005.1	hypothetical protein SORBI_3001G476400 [Sorghum bicolor]	------	------	------	------	------
TraesCS4A02G366000	3.455	5.54583	3.28	-	GO:0003824;GO:001678	MF:catalytic activity;MF:hydrolase activity;	K08726	EPHX2	map00590;map04146	Arachidonic acid metabolism;Peroxisome	ENOG410XVV6	S:Function unknown	KAF7045317.1	hypothetical protein CFC21_054434 [Triticum aestivum]	sp|I6YGS0|EPHA_MYCTU;	Epoxide hydrolase A OS=Mycobacterium tuberculosis;	PF00561.22;PF12697.9;PF12146.10	Abhydrolase_1;Abhydrolase_6;Hydrolase_4	alpha/beta hydrolase fold;Alpha/beta hydrolase family;Serine aminopeptidase, S33
TraesCS4A02G365100	3.785	6.25167	4.10083	-	GO:0106311;GO:0005524;GO:010631	old GO;MF:ATP binding;MF:old GO;	K14502	BIN2	map04075	Plant hormone signal transduction	COG0515	T:Signal transduction mechanisms	KAF7045305.1	hypothetical protein CFC21_054422 [Triticum aestivum]	sp|Q9LWN0|GSK1_ORYSJ;	Shaggy-related protein kinase GSK1 OS=Oryza sativa subsp. japonica OX=39947 GN=GSK1 PE=1 SV=1;	------	------	------
TraesCS4A02G335300	4.51667	10.8833	6.4825	-	------	------	K13456	RIN4	map04626	Plant-pathogen interaction	ENOG410YR29	S:Function unknown	VAH96851.1	unnamed protein product [Triticum turgidum subsp. durum]	sp|Q8GYN5|RIN4_ARATH;	RPM1-interacting protein 4 OS=Arabidopsis thaliana OX=3702 GN=RIN4 PE=1 SV=1;	PF05627.13	AvrRpt-cleavage	Cleavage site for pathogenic type III effector avirulence factor Avr
TraesCS4A02G313200	2.095	7.70417	3.14833	Flavin-containing monooxygenase [Source:UniProtKB/TrEMBL;Acc:W5DRQ8]	GO:0050661;GO:0050660;GO:000449	MF:NADP binding;MF:flavin adenine dinucleotide binding;MF:N,N-dimethylaniline monooxygenase activity;	K11816	YUCCA	map00380	Tryptophan metabolism	COG2072	P:Inorganic ion transport and metabolism	VAH96296.1	unnamed protein product [Triticum turgidum subsp. durum]	sp|O64489|YUC9_ARATH;	Probable indole-3-pyruvate monooxygenase YUCCA9 OS=Arabidopsis thaliana OX=3702 GN=YUC9 PE=2 SV=1;	PF13738.8;PF00743.21;PF07992.16;PF13434.8;PF01494.21;PF13450.8	Pyr_redox_3;FMO-like;Pyr_redox_2;K_oxygenase;FAD_binding_3;NAD_binding_8	Pyridine nucleotide-disulphide oxidoreductase;Flavin-binding monooxygenase-like;Pyridine nucleotide-disulphide oxidoreductase;L-lysine 6-monooxygenase;FAD binding domain;NA
TraesCS4A02G269400	5.6425	31.4433	7.935	-	GO:0046658;GO:000905	CC:anchored component of plasma membrane;MF:electron carrier activity;	------	------	------	------	ENOG410YPS7	S:Function unknown	XP_037422273.1	chemocyanin-like [Triticum dicoccoides]	sp|P60496|BABL_LILLO;	Chemocyanin OS=Lilium longiflorum OX=4690 PE=1 SV=1;	PF02298.19	Cu_bind_like	Plastocyanin-like domain
TraesCS4A02G258400	3.445	8.7875	6.2025	-	GO:004742	MF:nucleoside-triphosphate diphosphatase activity;	K06287	maf	------	------	COG0424	D:Cell cycle control, cell division, chromosome partitioning	KAF7044081.1	hypothetical protein CFC21_053354 [Triticum aestivum]	sp|Q54TC5|NTPPB_DICDI;	7-methyl-GTP pyrophosphatase OS=Dictyostelium discoideum OX=44689 GN=DDB_G0281937 PE=3 SV=1;	PF02545.16	Maf	Maf-like protein
TraesCS4A02G249600	3.77667	4.96583	3.5825	Folate transporter 1, chloroplastic [Source:Projected from Arabidopsis thaliana (AT5G66380) UniProtKB/Swiss-Prot;Acc:Q7XA87]	GO:0006862;GO:0055085;GO:0009941;GO:0016021;GO:0015230;GO:000851	BP:nucleotide transport;BP:transmembrane transport;CC:chloroplast envelope;CC:integral component of membrane;MF:FAD transmembrane transporter activity;MF:folic acid transporter activity;	K15115	SLC25A32, MFT	------	------	ENOG410XPAJ	S:Function unknown	XP_037422095.1	folate transporter 1, chloroplastic-like [Triticum dicoccoides]	sp|Q7XA87|FOLT1_ARATH;	Folate transporter 1, chloroplastic OS=Arabidopsis thaliana OX=3702 GN=FOLT1 PE=2 SV=1;	PF00153.29	Mito_carr	Mitochondrial carrier protein
TraesCS4A02G243400	3.23167	5.73	3.89	-	GO:0006383;GO:0005666;GO:0003899;GO:000367	BP:transcription from RNA polymerase III promoter;CC:DNA-directed RNA polymerase III complex;MF:DNA-directed RNA polymerase activity;MF:DNA binding;	K03026	RPC4, POLR3D	map03020	RNA polymerase	ENOG410XPDH	K:Transcription	KAF7043914.1	hypothetical protein CFC21_053212 [Triticum aestivum]	sp|Q91WD1|RPC4_MOUSE;	DNA-directed RNA polymerase III subunit RPC4 OS=Mus musculus OX=10090 GN=Polr3d PE=2 SV=2;	PF05132.16	RNA_pol_Rpc4	RNA polymerase III RPC4
TraesCS4A02G238500	5.52667	8.715	4.06917	-	GO:0015853;GO:0006863;GO:0015854;GO:0055085;GO:0016021;GO:0016020;GO:0005886;GO:0005345;GO:002285	BP:adenine transport;BP:purine nucleobase transport;BP:guanine transport;BP:transmembrane transport;CC:integral component of membrane;CC:membrane;CC:plasma membrane;MF:purine nucleobase transmembrane transporter activity;MF:transmembrane transporter activity;	K06901	pbuG, azgA, ghxP, ghxQ, adeQ	------	------	COG2252	S:Function unknown	XP_037421985.1	adenine/guanine permease AZG2-like [Triticum dicoccoides]	sp|Q84MA8|AZG2_ARATH;	Adenine/guanine permease AZG2 OS=Arabidopsis thaliana OX=3702 GN=AZG2 PE=2 SV=1;	PF00860.22	Xan_ur_permease	Permease family
TraesCS4A02G213400	3.01833	7.62583	2.63833	Nucleoside diphosphate kinase [Source:Projected from Arabidopsis thaliana (AT4G09320) UniProtKB/TrEMBL;Acc:A0A178UXQ6]	GO:0006228;GO:0006241;GO:0006165;GO:0006183;GO:0004550;GO:000552	BP:UTP biosynthetic process;BP:CTP biosynthetic process;BP:nucleoside diphosphate phosphorylation;BP:GTP biosynthetic process;MF:nucleoside diphosphate kinase activity;MF:ATP binding;	K00940	ndk, NME	map00240;map04016;map00230;map01240	Pyrimidine metabolism;MAPK signaling pathway - plant;Purine metabolism;Biosynthesis of cofactors	COG0105	F:Nucleotide transport and metabolism	KAF7043595.1	hypothetical protein CFC21_052925 [Triticum aestivum]	sp|Q07661|NDK1_ORYSJ;	Nucleoside diphosphate kinase 1 OS=Oryza sativa subsp. japonica OX=39947 GN=NDKR PE=1 SV=1;	PF00334.21	NDK	Nucleoside diphosphate kinase
TraesCS4A02G118500	2.86	4.4925	3.36333	-	------	------	------	------	------	------	------	------	KAF7042356.1	hypothetical protein CFC21_051991 [Triticum aestivum]	------	------	------	------	------
TraesCS4A02G116400	62.2392	184.158	67.8608	-	GO:0009738;GO:0006952;GO:0080163;GO:0009607;GO:0005737;GO:0005634;GO:0038023;GO:0004864;GO:001042	BP:abscisic acid-activated signaling pathway;BP:defense response;BP:regulation of protein serine/threonine phosphatase activity;BP:response to biotic stimulus;CC:cytoplasm;CC:nucleus;MF:signaling receptor activity;MF:protein phosphatase inhibitor activity;MF:abscisic acid binding;	------	------	------	------	ENOG410YZ38	S:Function unknown	XP_037420625.1	pathogenesis-related protein 1-like [Triticum dicoccoides]	sp|Q05736|PR1_ASPOF;	Pathogenesis-related protein 1 OS=Asparagus officinalis OX=4686 GN=PR1 PE=2 SV=1;	PF00407.21	Bet_v_1	Pathogenesis-related protein Bet v 1 family
TraesCS4A02G108100	3.74667	5.0975	3.77083	-	GO:0005743;GO:0016021;GO:003196	CC:mitochondrial inner membrane;CC:integral component of membrane;CC:mitochondrial membrane;	K18182	COX16	------	------	ENOG4111G2F	S:Function unknown	KAF7049403.1	hypothetical protein CFC21_057948 [Triticum aestivum]	------	------	PF14138.8	COX16	Cytochrome c oxidase assembly protein COX16
TraesCS4A02G063300	3.61333	5.71	4.23167	-	GO:000551	MF:protein binding;	------	------	------	------	ENOG41106TB;COG0457	S:Function unknown;	VAH88369.1	unnamed protein product [Triticum turgidum subsp. durum]	------	------	PF13424.8;PF13374.8;PF00515.30;PF07719.19;PF13176.8;PF17874.3;PF13432.8;PF14559.8	TPR_12;TPR_10;TPR_1;TPR_2;TPR_7;TPR_MalT;TPR_16;TPR_19	Tetratricopeptide repeat;Tetratricopeptide repeat;Tetratricopeptide repeat;Tetratricopeptide repeat;Tetratricopeptide repeat;MalT-like TPR region;Tetratricopeptide repeat;Tetratricopeptide repeat
TraesCS4A02G059400	3.4175	10.175	3.11667	Poly [ADP-ribose] polymerase [Source:UniProtKB/TrEMBL;Acc:W5DWF1]	GO:000395	MF:NAD+ ADP-ribosyltransferase activity;	------	------	------	------	ENOG4111NY1	S:Function unknown	XP_037420112.1	probable inactive poly [ADP-ribose] polymerase SRO2 [Triticum dicoccoides]	sp|Q8RY59|RCD1_ARATH;	Inactive poly [ADP-ribose] polymerase RCD1 OS=Arabidopsis thaliana OX=3702 GN=RCD1 PE=1 SV=1;	PF12174.10;PF00644.22	RST;PARP	RCD1-SRO-TAF4;Pol
TraesCS4A02G053800	3.33333	7.01167	4.0325	-	------	------	------	------	------	------	ENOG410Z0US	S:Function unknown	XP_037419960.1	remorin 1.4-like isoform X1 [Triticum dicoccoides]	------	------	PF03763.15	Remorin_C	Remorin, C-terminal region
TraesCS4A02G028300	3.20667	5.26667	4.13833	-	GO:0010374;GO:0010052;GO:000557	BP:stomatal complex development;BP:guard cell differentiation;CC:extracellular region;	------	------	------	------	ENOG410Z0UY	S:Function unknown	XP_037419734.1	EPIDERMAL PATTERNING FACTOR-like protein 4 [Triticum dicoccoides]	sp|Q2V3I3|EPFL4_ARATH;	EPIDERMAL PATTERNING FACTOR-like protein 4 OS=Arabidopsis thaliana OX=3702 GN=EPFL4 PE=1 SV=1;	PF17181.6	EPF	Epidermal patterning factor proteins
TraesCS4A02G017600	4.00583	5.7425	4.41167	-	GO:0004519;GO:000367	MF:endonuclease activity;MF:nucleic acid binding;	------	------	------	------	ENOG410YGZE	S:Function unknown	XP_037419642.1	uncharacterized protein LOC119284606 [Triticum dicoccoides]	------	------	PF01844.25;PF14279.8	HNH;HNH_5	HNH endonuclease;HNH endonuclease
TraesCS3D02G517800	11.2283	20.59	8.46	Peroxidase [Source:UniProtKB/TrEMBL;Acc:A0A341TM50]	GO:0006979;GO:0042744;GO:0005576;GO:0020037;GO:0016688;GO:0046872;GO:000460	BP:response to oxidative stress;BP:hydrogen peroxide catabolic process;CC:extracellular region;MF:heme binding;MF:L-ascorbate peroxidase activity;MF:metal ion binding;MF:peroxidase activity;	K00430	E1.11.1.7	map00940	Phenylpropanoid biosynthesis	ENOG410ZMT4	G:Carbohydrate transport and metabolism	XP_020198886.1	cationic peroxidase SPC4 [Aegilops tauschii subsp. strangulata]	sp|P84516|PER1_SORBI;	Cationic peroxidase SPC4 OS=Sorghum bicolor OX=4558 GN=Sb03g046810 PE=1 SV=2;	PF00141.25	peroxidase	Peroxidase
TraesCS3D02G497300	5.23917	19.9542	7.32583	-	GO:0045893;GO:0005634;GO:000367	BP:positive regulation of transcription, DNA-templated;CC:nucleus;MF:DNA binding;	------	------	------	------	ENOG4111TEK	S:Function unknown	KAF7040321.1	hypothetical protein CFC21_050230 [Triticum aestivum]	sp|Q9FXH7|SRS7_ARATH;	Protein SHI RELATED SEQUENCE 7 OS=Arabidopsis thaliana OX=3702 GN=SRS7 PE=1 SV=1;	PF05142.14	DUF702	Domain of unknown function
TraesCS3D02G482600	2.19083	4.93917	2.99583	-	GO:0009740;GO:0006355;GO:0005634;GO:0043565;GO:0003700;GO:000371	BP:gibberellic acid mediated signaling pathway;BP:regulation of transcription, DNA-templated;CC:nucleus;MF:sequence-specific DNA binding;MF:transcription factor activity, sequence-specific DNA binding;MF:transcription cofactor activity;	------	------	------	------	ENOG410XRSH;COG1948	K:Transcription;L:Replication, recombination and repair	KAF7040140.1	hypothetical protein CFC21_050061 [Triticum aestivum]	sp|Q9LPR8|SCL3_ARATH;	Scarecrow-like protein 3 OS=Arabidopsis thaliana OX=3702 GN=SCL3 PE=1 SV=1;	PF03514.16	GRAS	GRAS domain family
TraesCS3D02G370200	2.75	5.095	3.145	-	GO:001602	CC:integral component of membrane;	K19040	ATL76S	------	------	ENOG41121N2	O:Posttranslational modification, protein turnover, chaperones	XP_020167340.2	RING-H2 finger protein ATL73 [Aegilops tauschii subsp. strangulata]	sp|Q9FLC6|ATL73_ARATH;	RING-H2 finger protein ATL73 OS=Arabidopsis thaliana OX=3702 GN=ATL73 PE=2 SV=1;	PF13639.8;PF17123.7;PF13923.8;PF12678.9;PF14634.8;PF00097.27;PF12861.9;PF13445.8	zf-RING_2;zf-RING_11;zf-C3HC4_2;zf-rbx1;zf-RING_5;zf-C3HC4;zf-ANAPC11;zf-RING_UBOX	Ring finger domain;RING-like zinc finger;Zinc finger, C3HC4 type;RING-H2 zinc finger domain;zinc-RING finger domain;Zinc finger, C3HC4 type;Anaphase-promoting complex subunit 11 RING-H2 finger;RING-type zinc-finger
TraesCS3D02G361100	2.45667	6.12167	3.445	Wuschel-related homeobox protein [Source:UniProtKB/TrEMBL;Acc:T1WGQ3]	GO:0006355;GO:0099402;GO:0005634;GO:0003700;GO:000367	BP:regulation of transcription, DNA-templated;BP:plant organ development;CC:nucleus;MF:transcription factor activity, sequence-specific DNA binding;MF:DNA binding;	------	------	------	------	ENOG410YNZ0	K:Transcription	XP_020174913.1	WUSCHEL-related homeobox 9 [Aegilops tauschii subsp. strangulata]	sp|Q8W0F1|WOX9_ORYSJ;	WUSCHEL-related homeobox 9 OS=Oryza sativa subsp. japonica OX=39947 GN=WOX9 PE=2 SV=1;	PF00046.31	Homeodomain	Homeodomain
TraesCS3D02G337900	5.5075	12.5408	7.85917	ATSIK [Source:Projected from Arabidopsis thaliana (AT3G08760) UniProtKB/TrEMBL;Acc:A0A384KX76]	GO:0006468;GO:0005524;GO:000467	BP:protein phosphorylation;MF:ATP binding;MF:protein kinase activity;	------	------	------	------	COG0515	T:Signal transduction mechanisms	KAF7038359.1	hypothetical protein CFC21_048555 [Triticum aestivum]	sp|Q9SY91|PBL15_ARATH;	Probable serine/threonine-protein kinase PBL15 OS=Arabidopsis thaliana OX=3702 GN=PBL15 PE=1 SV=1;	PF07714.19;PF00069.27	PK_Tyr_Ser-Thr;Pkinase	Protein tyrosine and serine/threonine kinase;Protein kinase domain
TraesCS3D02G333800	3.21333	4.72417	3.445	-	GO:0006811;GO:0070588;GO:0006816;GO:0036444;GO:0051560;GO:1990246;GO:0016020;GO:0005739;GO:0031305;GO:0005743;GO:0016021;GO:0015292;GO:000526	BP:ion transport;BP:calcium ion transmembrane transport;BP:calcium ion transport;BP:calcium ion transmembrane import into mitochondrion;BP:mitochondrial calcium ion homeostasis;CC:uniplex complex;CC:membrane;CC:mitochondrion;CC:integral component of mitochondrial inner membrane;CC:mitochondrial inner membrane;CC:integral component of membrane;MF:uniporter activity;MF:calcium channel activity;	K20858	MCU	------	------	ENOG410Y3YU	S:Function unknown	XP_020182286.1	calcium uniporter protein 6, mitochondrial [Aegilops tauschii subsp. strangulata]	sp|Q8VYR0|MCU5_ARATH;	Calcium uniporter protein 5, mitochondrial OS=Arabidopsis thaliana OX=3702 GN=At1g57610 PE=2 SV=1;	PF04678.15	MCU	Mitochondrial calcium uniporter
TraesCS3D02G305400	4.0925	33.5925	5.71583	-	GO:0006979;GO:0042744;GO:0005576;GO:0009505;GO:0009506;GO:0020037;GO:0046872;GO:000460	BP:response to oxidative stress;BP:hydrogen peroxide catabolic process;CC:extracellular region;CC:plant-type cell wall;CC:plasmodesma;MF:heme binding;MF:metal ion binding;MF:peroxidase activity;	K00430	E1.11.1.7	map00940	Phenylpropanoid biosynthesis	ENOG41106HZ	S:Function unknown	KAF7037964.1	hypothetical protein CFC21_048224 [Triticum aestivum]	sp|A5H8G4|PER1_MAIZE;	Peroxidase 1 OS=Zea mays OX=4577 GN=PER1 PE=1 SV=1;	PF00141.25	peroxidase	Peroxidase
TraesCS3D02G305300	20.1725	120.673	15.8983	Peroxidase [Source:UniProtKB/TrEMBL;Acc:A0A1D5WFR9]	GO:0006979;GO:0042744;GO:0005576;GO:0009505;GO:0009506;GO:0020037;GO:0046872;GO:000460	BP:response to oxidative stress;BP:hydrogen peroxide catabolic process;CC:extracellular region;CC:plant-type cell wall;CC:plasmodesma;MF:heme binding;MF:metal ion binding;MF:peroxidase activity;	K00430	E1.11.1.7	map00940	Phenylpropanoid biosynthesis	ENOG41106HZ	S:Function unknown	KAF7037964.1	hypothetical protein CFC21_048224 [Triticum aestivum]	sp|Q9FEQ8|PER2_MAIZE;	Peroxidase 2 OS=Zea mays OX=4577 GN=PER2 PE=2 SV=1;	PF00141.25	peroxidase	Peroxidase
TraesCS3D02G305200	3.505	29.0092	3.58083	Peroxidase [Source:UniProtKB/TrEMBL;Acc:A0A1D5WJK4]	GO:0006979;GO:0042744;GO:0005576;GO:0020037;GO:0046872;GO:000460	BP:response to oxidative stress;BP:hydrogen peroxide catabolic process;CC:extracellular region;MF:heme binding;MF:metal ion binding;MF:peroxidase activity;	K00430	E1.11.1.7	map00940	Phenylpropanoid biosynthesis	ENOG41106HZ	S:Function unknown	KAF7037963.1	hypothetical protein CFC21_048223 [Triticum aestivum]	sp|Q9FEQ8|PER2_MAIZE;	Peroxidase 2 OS=Zea mays OX=4577 GN=PER2 PE=2 SV=1;	PF00141.25	peroxidase	Peroxidase
TraesCS3D02G293800	4.275	24.895	7.53917	GA2ox-D3 protein [Source:UniProtKB/TrEMBL;Acc:H9C870]	GO:0009685;GO:0009416;GO:0045487;GO:0016491;GO:0052634;GO:0051213;GO:0046872;GO:004554	BP:gibberellin metabolic process;BP:response to light stimulus;BP:gibberellin catabolic process;MF:oxidoreductase activity;MF:C-19 gibberellin 2-beta-dioxygenase activity;MF:dioxygenase activity;MF:metal ion binding;MF:gibberellin 2-beta-dioxygenase activity;	K04125	GA2ox	map00904	Diterpenoid biosynthesis	COG3491	S:Function unknown	XP_020179705.1	gibberellin 2-beta-dioxygenase 3 [Aegilops tauschii subsp. strangulata]	sp|Q8S0S6|G2OX3_ORYSJ;	Gibberellin 2-beta-dioxygenase 3 OS=Oryza sativa subsp. japonica OX=39947 GN=GA2OX3 PE=1 SV=1;	PF03171.22;PF14226.8	2OG-FeII_Oxy;DIOX_N	2OG-F;non-haem dioxygenase in morphine synthesis N-terminal
TraesCS3D02G285000	2.97833	4.76083	3.97833	-	GO:0000162;GO:0006568;GO:0003824;GO:000442	BP:tryptophan biosynthetic process;BP:tryptophan metabolic process;MF:catalytic activity;MF:indole-3-glycerol-phosphate synthase activity;	K01609	trpC	map00400	Phenylalanine, tyrosine and tryptophan biosynthesis	COG0134	E:Amino acid transport and metabolism	KAF7037694.1	hypothetical protein CFC21_048018 [Triticum aestivum]	sp|P49572|TRPC_ARATH;	Indole-3-glycerol phosphate synthase, chloroplastic OS=Arabidopsis thaliana OX=3702 GN=IGPS PE=1 SV=2;	PF00218.23	IGPS	Indole-3-glycerol phosphate synthase
TraesCS3D02G270600	3.88167	7.74417	3.91	-	------	------	------	------	------	------	ENOG411049C;ENOG4111DH7	S:Function unknown;	KAF7037515.1	hypothetical protein CFC21_047874 [Triticum aestivum]	------	------	------	------	------
TraesCS3D02G260700	3.54333	6.2775	4.00083	-	GO:006163	MF:ubiquitin protein ligase activity;	------	------	------	------	ENOG41121N2	O:Posttranslational modification, protein turnover, chaperones	XP_020179198.1	E3 ubiquitin-protein ligase MBR2 [Aegilops tauschii subsp. strangulata]	sp|O49500|MBR2_ARATH;	E3 ubiquitin-protein ligase MBR2 OS=Arabidopsis thaliana OX=3702 GN=MBR2 PE=1 SV=1;	PF13639.8;PF12678.9;PF13923.8;PF14634.8;PF00097.27;PF17123.7;PF13445.8;PF13920.8;PF12861.9	zf-RING_2;zf-rbx1;zf-C3HC4_2;zf-RING_5;zf-C3HC4;zf-RING_11;zf-RING_UBOX;zf-C3HC4_3;zf-ANAPC11	Ring finger domain;RING-H2 zinc finger domain;Zinc finger, C3HC4 type;zinc-RING finger domain;Zinc finger, C3HC4 type;RING-like zinc finger;RING-type zinc-finger;Zinc finger, C3HC4 type;Anaphase-promoting complex subunit 11 RING-H2 finger
TraesCS3D02G258800	5.08833	6.49	4.63667	-	GO:0016020;GO:001675	CC:membrane;MF:transferase activity, transferring glycosyl groups;	------	------	------	------	ENOG410ZJRX	S:Function unknown	XP_020169528.1	glycosyltransferase BC10 [Aegilops tauschii subsp. strangulata]	sp|Q65XS5|BC10_ORYSJ;	Glycosyltransferase BC10 OS=Oryza sativa subsp. japonica OX=39947 GN=BC10 PE=1 SV=1;	PF02485.23	Branch	Core-2/I-Branching enzyme
TraesCS3D02G257900	3.1025	8.07667	2.3025	Multidrug resistance protein 1 homolog [Source:UniProtKB/TrEMBL;Acc:Q8RVT7]	GO:0055085;GO:0016021;GO:0016020;GO:0042626;GO:0140359;GO:0000166;GO:000552	BP:transmembrane transport;CC:integral component of membrane;CC:membrane;MF:ATPase activity, coupled to transmembrane movement of substances;MF:ABC-type transmembrane transporter activity;MF:nucleotide binding;MF:ATP binding;	K05658	ABCB1, CD243	map02010	ABC transporters	COG1132	V:Defense mechanisms	KAF7037320.1	hypothetical protein CFC21_047724 [Triticum aestivum]	sp|Q9FWX7|AB11B_ARATH;	ABC transporter B family member 11 OS=Arabidopsis thaliana OX=3702 GN=ABCB11 PE=2 SV=1;	PF00664.25;PF00005.29;PF02463.21;PF13555.8;PF13401.8;PF09818.11	ABC_membrane;ABC_tran;SMC_N;AAA_29;AAA_22;ABC_ATPase	ABC transporter transmembrane region;ABC transporter;RecF/RecN/SMC N terminal domain;P-loop containing region of AAA domain;AAA domain;Predicted ATPase of the ABC class
TraesCS3D02G242500	3.46667	9.56167	4.64667	-	GO:0006355;GO:0005634;GO:0003700;GO:004356	BP:regulation of transcription, DNA-templated;CC:nucleus;MF:transcription factor activity, sequence-specific DNA binding;MF:sequence-specific DNA binding;	------	------	------	------	ENOG410ZMEJ;ENOG410YSII	K:Transcription;	XP_020188507.1	probable WRKY transcription factor 48 [Aegilops tauschii subsp. strangulata]	sp|Q93WV4|WRK71_ARATH;	WRKY transcription factor 71 OS=Arabidopsis thaliana OX=3702 GN=WRKY71 PE=2 SV=1;	PF03106.17	WRKY	WRKY DNA -binding domain
TraesCS3D02G220000	3.92333	7.26167	3.5275	-	GO:0031146;GO:0004842;GO:000551	BP:SCF-dependent proteasomal ubiquitin-dependent protein catabolic process;MF:ubiquitin-protein transferase activity;MF:protein binding;	------	------	------	------	ENOG410Y9RG	S:Function unknown	XP_020155958.1	uncharacterized protein LOC109741293 [Aegilops tauschii subsp. strangulata]	------	------	PF00646.35	F-box	F-box domain
TraesCS3D02G216700	6.3675	10.9717	6.705	-	GO:0006508;GO:000419	BP:proteolysis;MF:aspartic-type endopeptidase activity;	K22683	APF2	------	------	ENOG410XNV7	O:Posttranslational modification, protein turnover, chaperones	KAF7036783.1	hypothetical protein CFC21_047327 [Triticum aestivum]	sp|Q9LNJ3|APF2_ARATH;	Aspartyl protease family protein 2 OS=Arabidopsis thaliana OX=3702 GN=APF2 PE=2 SV=1;	PF14543.8;PF14541.8;PF00026.25	TAXi_N;TAXi_C;Asp	Xylanase inhibitor N-terminal;Xylanase inhibitor C-terminal;Eukaryotic aspartyl protease
TraesCS3D02G211000	5.41167	11.6025	5.37583	-	GO:0005524;GO:000438	MF:ATP binding;MF:helicase activity;	------	------	------	------	COG1112	L:Replication, recombination and repair	KAF7036697.1	hypothetical protein CFC21_047266 [Triticum aestivum]	sp|O94387|YGSA_SCHPO;	Uncharacterized ATP-dependent helicase C29A10.10c OS=Schizosaccharomyces pombe;	PF13087.8	AAA_12	AAA domain
TraesCS3D02G185600	3.90333	7.63917	3.3875	-	GO:001602	CC:integral component of membrane;	------	------	------	------	------	------	KAF7036245.1	hypothetical protein CFC21_046969 [Triticum aestivum]	------	------	------	------	------
TraesCS3D02G162100	5.29667	7.9	6.01583	-	GO:004761	MF:acyl-CoA hydrolase activity;	K17362	ACOT13	------	------	ENOG410Z001;COG2050	S:Function unknown;Q:Secondary metabolites biosynthesis, transport and catabolism	XP_037416596.1	uncharacterized protein LOC119279473 [Triticum dicoccoides]	sp|Q9NPJ3|ACO13_HUMAN;	Acyl-coenzyme A thioesterase 13 OS=Homo sapiens OX=9606 GN=ACOT13 PE=1 SV=1;	PF03061.24	4HBT	Thioesterase superfamily
TraesCS3D02G149500	3.79083	10.8267	4.10583	Probable tRNA N6-adenosine threonylcarbamoyltransferase, mitochondrial [Source:UniProtKB/TrEMBL;Acc:A0A1D5WVV9]	GO:0002949;GO:0005739;GO:0004222;GO:0046872;GO:006171	BP:tRNA threonylcarbamoyladenosine modification;CC:mitochondrion;MF:metalloendopeptidase activity;MF:metal ion binding;MF:;	K01409	KAE1, tsaD, QRI7	------	------	COG0533	O:Posttranslational modification, protein turnover, chaperones	KAF7035827.1	hypothetical protein CFC21_046618 [Triticum aestivum]	sp|O22145|OSGP2_ARATH;	Probable tRNA N6-adenosine threonylcarbamoyltransferase, mitochondrial OS=Arabidopsis thaliana OX=3702 GN=GCP1 PE=2 SV=2;	PF00814.27	TsaD	tRNA N6-adenosine threonylcarbamoyltransferase
TraesCS3D02G129900	8.2775	22.4367	8.3325	ABC subfamily C transporter [Source:UniProtKB/TrEMBL;Acc:A0A0D3RBU8]	GO:0055085;GO:0000325;GO:0016021;GO:0016020;GO:0005774;GO:0140359;GO:0042626;GO:0000166;GO:000552	BP:transmembrane transport;CC:plant-type vacuole;CC:integral component of membrane;CC:membrane;CC:vacuolar membrane;MF:ABC-type transmembrane transporter activity;MF:ATPase activity, coupled to transmembrane movement of substances;MF:nucleotide binding;MF:ATP binding;	------	------	------	------	COG1132	V:Defense mechanisms	AJR33103.1	ABC subfamily C transporter [Triticum aestivum]	sp|Q9LK64|AB3C_ARATH;	ABC transporter C family member 3 OS=Arabidopsis thaliana OX=3702 GN=ABCC3 PE=1 SV=1;	PF00664.25;PF00005.29;PF13555.8;PF01926.25;PF13476.8;PF13304.8	ABC_membrane;ABC_tran;AAA_29;MMR_HSR1;AAA_23;AAA_21	ABC transporter transmembrane region;ABC transporter;P-loop containing region of AAA domain;50S ribosome-binding GTPase;AAA domain;AAA domain, putative AbiEii toxin, Type IV TA system
TraesCS3D02G124200	2.73667	6.92167	4.085	-	GO:0006468;GO:0007166;GO:0016021;GO:0005886;GO:0030247;GO:0004674;GO:0004672;GO:000552	BP:protein phosphorylation;BP:cell surface receptor signaling pathway;CC:integral component of membrane;CC:plasma membrane;MF:polysaccharide binding;MF:protein serine/threonine kinase activity;MF:protein kinase activity;MF:ATP binding;	------	------	------	------	COG0515	T:Signal transduction mechanisms	KAF7035527.1	hypothetical protein CFC21_046389 [Triticum aestivum]	sp|Q9LZM4|WAKLQ_ARATH;	Wall-associated receptor kinase-like 20 OS=Arabidopsis thaliana OX=3702 GN=WAKL20 PE=2 SV=1;	PF00069.27;PF07714.19;PF13947.8	Pkinase;PK_Tyr_Ser-Thr;GUB_WAK_bind	Protein kinase domain;Protein tyrosine and serine/threonine kinase;Wall-associated receptor kinase galacturonan-binding
TraesCS3D02G119800	2.44083	5.44083	3.43417	-	GO:000551	MF:protein binding;	------	------	------	------	ENOG410Y973	S:Function unknown	XP_020191645.1	leucine-rich repeat extensin-like protein 3 [Aegilops tauschii subsp. strangulata]	sp|O48809|LRX2_ARATH;	Leucine-rich repeat extensin-like protein 2 OS=Arabidopsis thaliana OX=3702 GN=LRX2 PE=1 SV=1;	PF13855.8;PF12799.9;PF08263.14	LRR_8;LRR_4;LRRNT_2	Leucine rich repeat;Leucine Rich repeats;Leucine rich repeat N-terminal domain
TraesCS3D02G048100	2.71417	4.43833	3.19667	-	GO:0030247;GO:0005524;GO:000467	MF:polysaccharide binding;MF:ATP binding;MF:protein kinase activity;	------	------	------	------	ENOG4111F9N	S:Function unknown	KAF7034609.1	hypothetical protein CFC21_045594 [Triticum aestivum]	------	------	------	------	------
TraesCS3B02G553200	3.89167	5.88917	3.55333	-	GO:0009395;GO:0048364;GO:0042742;GO:0048229;GO:0005794;GO:0009507;GO:0016788;GO:0003824;GO:000462	BP:phospholipid catabolic process;BP:root development;BP:defense response to bacterium;BP:gametophyte development;CC:Golgi apparatus;CC:chloroplast;MF:hydrolase activity, acting on ester bonds;MF:catalytic activity;MF:phospholipase C activity;	K01114	plc	map00565;map00564;map00562	Ether lipid metabolism;Glycerophospholipid metabolism;Inositol phosphate metabolism	COG3511	M:Cell wall/membrane/envelope biogenesis	KAF7033357.1	hypothetical protein CFC21_044464 [Triticum aestivum]	sp|O81020|NPC2_ARATH;	Non-specific phospholipase C2 OS=Arabidopsis thaliana OX=3702 GN=NPC2 PE=2 SV=1;	PF04185.16	Phosphoesterase	Phosphoesterase family
TraesCS3B02G537600	15.6158	26.4442	15.5592	-	GO:001602	CC:integral component of membrane;	------	------	------	------	ENOG410ZC80	S:Function unknown	KAF7033184.1	hypothetical protein CFC21_044303 [Triticum aestivum]	------	------	PF12734.9	CYSTM	Cysteine-rich TM module stress tolerance
TraesCS3B02G535100	3.96583	7.19583	4.68083	-	GO:0009740;GO:0006355;GO:0005634;GO:0043565;GO:0003700;GO:000371	BP:gibberellic acid mediated signaling pathway;BP:regulation of transcription, DNA-templated;CC:nucleus;MF:sequence-specific DNA binding;MF:transcription factor activity, sequence-specific DNA binding;MF:transcription cofactor activity;	------	------	------	------	ENOG410XRSH;COG1948	K:Transcription;L:Replication, recombination and repair	KAF7033165.1	hypothetical protein CFC21_044285 [Triticum aestivum]	sp|Q9LPR8|SCL3_ARATH;	Scarecrow-like protein 3 OS=Arabidopsis thaliana OX=3702 GN=SCL3 PE=1 SV=1;	PF03514.16	GRAS	GRAS domain family
TraesCS3B02G514800	2.8425	11.1808	2.45333	Xylanase inhibitor TAXI-I [Source:UniProtKB/TrEMBL;Acc:Q8H0K8]	GO:0008152;GO:0045493;GO:0006508;GO:0016787;GO:0016798;GO:000419	BP:metabolic process;BP:xylan catabolic process;BP:proteolysis;MF:hydrolase activity;MF:hydrolase activity, acting on glycosyl bonds;MF:aspartic-type endopeptidase activity;	------	------	------	------	ENOG410XNV7	O:Posttranslational modification, protein turnover, chaperones	BAD72880.1	xylanase inhibitor TAXI-I [Triticum aestivum]	sp|Q8S1V1|CLP_ORYSJ;	Chitinase CLP OS=Oryza sativa subsp. japonica OX=39947 GN=CLP PE=1 SV=1;	PF14541.8;PF14543.8	TAXi_C;TAXi_N	Xylanase inhibitor C-terminal;Xylanase inhibitor N-terminal
TraesCS3B02G468400	4.23417	6.45083	4.4025	-	GO:0005634;GO:0046872;GO:000367	CC:nucleus;MF:metal ion binding;MF:DNA binding;	------	------	------	------	ENOG410YD0Z	S:Function unknown	KAF7032424.1	hypothetical protein CFC21_043596 [Triticum aestivum]	sp|Q0JGI1|SPL2_ORYSJ;	Squamosa promoter-binding-like protein 2 OS=Oryza sativa subsp. japonica OX=39947 GN=SPL2 PE=2 SV=2;	PF03110.16	SBP	SBP domain
TraesCS3B02G466000	4.2125	5.85	3.03917	-	GO:0016021;GO:001602	CC:integral component of membrane;CC:membrane;	------	------	------	------	ENOG41106HX	S:Function unknown	XP_037415421.1	UPF0481 protein At3g47200-like [Triticum dicoccoides]	sp|Q9SD53|Y3720_ARATH;	UPF0481 protein At3g47200 OS=Arabidopsis thaliana OX=3702 GN=At3g47200 PE=2 SV=1;	PF03140.17	DUF247	Plant protein of unknown function
TraesCS3B02G398400	2.76167	4.0925	2.65333	-	------	------	------	------	------	------	ENOG410YBGZ	S:Function unknown	VAH81851.1	unnamed protein product [Triticum turgidum subsp. durum]	sp|Q9LFB9|OPSL1_ARATH;	Protein OCTOPUS-like OS=Arabidopsis thaliana OX=3702 GN=OPSL1 PE=2 SV=1;	PF05340.14	DUF740	Protein of unknown function
TraesCS3B02G339800	4.66083	10.0692	3.49333	Peroxidase [Source:UniProtKB/TrEMBL;Acc:A0A1D5VWG6]	GO:0006979;GO:0042744;GO:0005576;GO:0020037;GO:0046872;GO:000460	BP:response to oxidative stress;BP:hydrogen peroxide catabolic process;CC:extracellular region;MF:heme binding;MF:metal ion binding;MF:peroxidase activity;	K00430	E1.11.1.7	map00940	Phenylpropanoid biosynthesis	ENOG41106HZ	S:Function unknown	KAF7030938.1	hypothetical protein CFC21_042366 [Triticum aestivum]	sp|Q9FEQ8|PER2_MAIZE;	Peroxidase 2 OS=Zea mays OX=4577 GN=PER2 PE=2 SV=1;	PF00141.25	peroxidase	Peroxidase
TraesCS3B02G282000	3.03083	13.0792	5.69167	-	GO:0006430;GO:0006418;GO:0005737;GO:0004824;GO:0004812;GO:0000166;GO:0003676;GO:000552	BP:lysyl-tRNA aminoacylation;BP:tRNA aminoacylation for protein translation;CC:cytoplasm;MF:lysine-tRNA ligase activity;MF:aminoacyl-tRNA ligase activity;MF:nucleotide binding;MF:nucleic acid binding;MF:ATP binding;	K04567	KARS, lysS	map00970	Aminoacyl-tRNA biosynthesis	COG1190	J:Translation, ribosomal structure and biogenesis	KAF7030167.1	hypothetical protein CFC21_041767 [Triticum aestivum]	sp|Q6F2U9|SYK_ORYSJ;	Lysine--tRNA ligase OS=Oryza sativa subsp. japonica OX=39947 GN=Os03g0586800 PE=2 SV=1;	PF00152.22;PF01336.27;PF01409.22	tRNA-synt_2;tRNA_anti-codon;tRNA-synt_2d	tRNA synthetases class II;OB-fold nucleic acid binding domain;tRNA synthetases class II core domain
TraesCS3B02G262500	2.75083	5.06167	2.9125	-	GO:0031146;GO:0004842;GO:000551	BP:SCF-dependent proteasomal ubiquitin-dependent protein catabolic process;MF:ubiquitin-protein transferase activity;MF:protein binding;	------	------	------	------	ENOG410Y9RG	S:Function unknown	XP_037413343.1	uncharacterized protein LOC119276389 [Triticum dicoccoides]	------	------	PF00646.35	F-box	F-box domain
TraesCS3B02G246300	1.67917	8.44833	2.92667	-	GO:0016887;GO:0005524;GO:000016	MF:ATPase activity;MF:ATP binding;MF:nucleotide binding;	------	------	------	------	COG0465	O:Posttranslational modification, protein turnover, chaperones	KAF7029742.1	hypothetical protein CFC21_041421 [Triticum aestivum]	sp|Q8VZG2|HSR4_ARATH;	Protein HYPER-SENSITIVITY-RELATED 4 OS=Arabidopsis thaliana OX=3702 GN=HSR4 PE=2 SV=1;	PF14363.8;PF00004.31;PF20030.1	AAA_assoc;AAA;bpMoxR	Domain associated at C-terminal with AAA;ATPase family associated with various cellular activities;MoxR domain in the MoxR-vWA-beta-propeller ternary systems
TraesCS3B02G213000	2.76583	4.5375	3.13583	-	GO:0009058;GO:0005737;GO:0003824;GO:001685	BP:biosynthetic process;CC:cytoplasm;MF:catalytic activity;MF:isomerase activity;	------	------	------	------	COG0384	S:Function unknown	KAF7010967.1	hypothetical protein CFC21_025327 [Triticum aestivum]	sp|Q9KG32|Y283_BACHD;	Uncharacterized isomerase BH0283 OS=Bacillus halodurans;	PF02567.18	PhzC-PhzF	Phenazine biosynthesis-like protein
TraesCS3B02G210400	2.87417	7.2625	3.175	-	GO:001602	CC:integral component of membrane;	------	------	------	------	------	------	KAF7029218.1	hypothetical protein CFC21_041023 [Triticum aestivum]	------	------	------	------	------
TraesCS3B02G205800	6.405	22.5558	7.76667	-	GO:0045841;GO:0009733;GO:2000280;GO:0009909;GO:0072686;GO:0005634;GO:0005737;GO:000552	BP:negative regulation of mitotic metaphase/anaphase transition;BP:response to auxin;BP:regulation of root development;BP:regulation of flower development;CC:mitotic spindle;CC:nucleus;CC:cytoplasm;MF:GTP binding;	------	------	------	------	ENOG4112CDX	S:Function unknown	XP_020163905.1	flowering-promoting factor 1-like protein 1 [Aegilops tauschii subsp. strangulata]	sp|Q9LGE3|FLP1_ORYSJ;	Flowering-promoting factor 1-like protein 1 OS=Oryza sativa subsp. japonica OX=39947 GN=RAA1 PE=1 SV=1;	------	------	------
TraesCS3B02G197300	6.3275	11.07	8.87583	-	GO:0016021;GO:001602	CC:integral component of membrane;CC:membrane;	------	------	------	------	ENOG410XRKZ	G:Carbohydrate transport and metabolism	KAF7029049.1	hypothetical protein CFC21_040884 [Triticum aestivum]	sp|Q8RWQ5|FBT4_ARATH;	Probable folate-biopterin transporter 4 OS=Arabidopsis thaliana OX=3702 GN=At5g54860 PE=2 SV=1;	PF03092.18;PF07690.18;PF11700.10	BT1;MFS_1;ATG22	BT1 family;Major Facilitator Superfamily;Vacuole effluxer Atg22 like
TraesCS3B02G148100	4.98167	9.19167	4.97	ABC subfamily C transporter [Source:UniProtKB/TrEMBL;Acc:A0A077RXF4]	GO:0055085;GO:0000325;GO:0016021;GO:0016020;GO:0005774;GO:0140359;GO:0042626;GO:0000166;GO:000552	BP:transmembrane transport;CC:plant-type vacuole;CC:integral component of membrane;CC:membrane;CC:vacuolar membrane;MF:ABC-type transmembrane transporter activity;MF:ATPase activity, coupled to transmembrane movement of substances;MF:nucleotide binding;MF:ATP binding;	------	------	------	------	COG1132	V:Defense mechanisms	AJR33102.1	ABC subfamily C transporter [Triticum aestivum]	sp|Q9LK64|AB3C_ARATH;	ABC transporter C family member 3 OS=Arabidopsis thaliana OX=3702 GN=ABCC3 PE=1 SV=1;	PF00664.25;PF00005.29;PF13555.8;PF01926.25;PF13476.8;PF13304.8	ABC_membrane;ABC_tran;AAA_29;MMR_HSR1;AAA_23;AAA_21	ABC transporter transmembrane region;ABC transporter;P-loop containing region of AAA domain;50S ribosome-binding GTPase;AAA domain;AAA domain, putative AbiEii toxin, Type IV TA system
TraesCS3B02G140300	6.01917	22.7142	6.04083	-	------	------	------	------	------	------	ENOG41107FJ	S:Function unknown	KAF7028404.1	hypothetical protein CFC21_040336 [Triticum aestivum]	sp|F2VYU4|PIK1_ORYSJ;	Disease resistance protein Pik-1 OS=Oryza sativa subsp. japonica OX=39947 GN=PIK-1 PE=1 SV=1;	------	------	------
TraesCS3B02G127400	9.915	23.7867	10.3025	Auxin-responsive protein [Source:UniProtKB/TrEMBL;Acc:A0A077RTL4]	GO:0009733;GO:0009734;GO:0006355;GO:0006351;GO:0005634;GO:000551	BP:response to auxin;BP:auxin-activated signaling pathway;BP:regulation of transcription, DNA-templated;BP:transcription, DNA-templated;CC:nucleus;MF:protein binding;	K14484	IAA	map04075	Plant hormone signal transduction	ENOG41105MQ	K:Transcription	XP_037411765.1	auxin-responsive protein IAA2-like [Triticum dicoccoides]	sp|P0C127|IAA16_ORYSJ;	Auxin-responsive protein IAA16 OS=Oryza sativa subsp. japonica OX=39947 GN=IAA16 PE=2 SV=1;	PF02309.18	AUX_IAA	AUX/IAA family
TraesCS3B02G040300	2.25917	6.97417	3.01	-	GO:001602	CC:integral component of membrane;	------	------	------	------	ENOG410YFFW	S:Function unknown	KAF7027192.1	hypothetical protein CFC21_039258 [Triticum aestivum]	------	------	PF07891.14	DUF1666	Protein of unknown function
TraesCS3A02G532700	3.37833	4.98583	3.51083	Zinc finger, RING/FYVE/PHD-type domain containing protein [Source: Projected from Oryza sativa (Os01g0974400)]	GO:0016740;GO:000551	MF:transferase activity;MF:protein binding;	K19044	XBAT32_33	------	------	COG0666	S:Function unknown	KAF7026540.1	hypothetical protein CFC21_038651 [Triticum aestivum]	sp|Q65XV2|XB3_ORYSJ;	E3 ubiquitin-protein ligase XB3 OS=Oryza sativa subsp. japonica OX=39947 GN=XB3 PE=1 SV=1;	PF12796.9;PF13637.8;PF13857.8;PF13606.8;PF00023.32	Ank_2;Ank_4;Ank_5;Ank_3;Ank	Ankyrin repeats;Ankyrin repeats;Ankyrin repeats;Ankyrin repeat;Ankyrin repeat
TraesCS3A02G491400	2.48917	4.2175	3.38917	-	GO:0006468;GO:0016192;GO:0006886;GO:0030130;GO:0030132;GO:0005198;GO:0004674;GO:0004672;GO:000552	BP:protein phosphorylation;BP:vesicle-mediated transport;BP:intracellular protein transport;CC:clathrin coat of trans-Golgi network vesicle;CC:clathrin coat of coated pit;MF:structural molecule activity;MF:protein serine/threonine kinase activity;MF:protein kinase activity;MF:ATP binding;	K04733;K12616	IRAK4;EDC4	map03018	RNA degradation	COG0515;ENOG410XPH1	T:Signal transduction mechanisms;U:Intracellular trafficking, secretion, and vesicular transport	KAF7026080.1	hypothetical protein CFC21_038214 [Triticum aestivum]	sp|Q9SYS3|CRK40_ARATH;	Cysteine-rich receptor-like protein kinase 40 OS=Arabidopsis thaliana OX=3702 GN=CRK40 PE=2 SV=1;	PF00069.27;PF07714.19	Pkinase;PK_Tyr_Ser-Thr	Protein kinase domain;Protein tyrosine and serine/threonine kinase
TraesCS3A02G432500	4.74583	7.7975	4.31167	-	GO:0005634;GO:0046872;GO:000367	CC:nucleus;MF:metal ion binding;MF:DNA binding;	------	------	------	------	ENOG410YD0Z	S:Function unknown	KAF7025460.1	hypothetical protein CFC21_037632 [Triticum aestivum]	sp|Q0JGI1|SPL2_ORYSJ;	Squamosa promoter-binding-like protein 2 OS=Oryza sativa subsp. japonica OX=39947 GN=SPL2 PE=2 SV=2;	PF03110.16	SBP	SBP domain
TraesCS3A02G420600	2.85083	4.82667	3.59	-	------	------	------	------	------	------	ENOG41112YB	S:Function unknown	KAF7062189.1	hypothetical protein CFC21_068818 [Triticum aestivum]	------	------	------	------	------
TraesCS3A02G407400	3.72917	5.56667	3.28833	Probable magnesium transporter [Source:UniProtKB/TrEMBL;Acc:A0A1D5V640]	GO:0015693;GO:0016021;GO:0016020;GO:0005886;GO:0005769;GO:001509	BP:magnesium ion transport;CC:integral component of membrane;CC:membrane;CC:plasma membrane;CC:early endosome;MF:magnesium ion transmembrane transporter activity;	K22733	NIPA, SLC57A2S	------	------	ENOG410XNR8	S:Function unknown	KAF7025152.1	hypothetical protein CFC21_037380 [Triticum aestivum]	sp|Q94AH3|NIPA4_ARATH;	Probable magnesium transporter NIPA4 OS=Arabidopsis thaliana OX=3702 GN=At1g71900 PE=2 SV=1;	PF05653.16;PF00892.22	Mg_trans_NIPA;EamA	Magnesium transporter NIPA;EamA-like transporter family
TraesCS3A02G396100	2.67417	10.6425	3.37083	-	GO:000573	CC:mitochondrion;	------	------	------	------	ENOG410ZEWF	S:Function unknown	XP_037407672.1	protein SENESCENCE-ASSOCIATED GENE 21, mitochondrial-like [Triticum dicoccoides]	sp|Q93WF6|SAG21_ARATH;	Protein SENESCENCE-ASSOCIATED GENE 21, mitochondrial OS=Arabidopsis thaliana OX=3702 GN=SAG21 PE=2 SV=1;	PF03242.15	LEA_3	Late embryogenesis abundant protein
TraesCS3A02G377100	2.99833	4.8	3.29833	-	GO:001602	CC:integral component of membrane;	K19040	ATL76S	------	------	ENOG41121N2	O:Posttranslational modification, protein turnover, chaperones	VAH65882.1	unnamed protein product [Triticum turgidum subsp. durum]	sp|Q9SG96|ATL72_ARATH;	RING-H2 finger protein ATL72 OS=Arabidopsis thaliana OX=3702 GN=ATL72 PE=2 SV=1;	PF13639.8;PF17123.7;PF13923.8;PF12678.9;PF14634.8;PF00097.27;PF12861.9;PF13445.8	zf-RING_2;zf-RING_11;zf-C3HC4_2;zf-rbx1;zf-RING_5;zf-C3HC4;zf-ANAPC11;zf-RING_UBOX	Ring finger domain;RING-like zinc finger;Zinc finger, C3HC4 type;RING-H2 zinc finger domain;zinc-RING finger domain;Zinc finger, C3HC4 type;Anaphase-promoting complex subunit 11 RING-H2 finger;RING-type zinc-finger
TraesCS3A02G341700	2.5275	5.01917	3.74583	-	GO:0006355;GO:0005634;GO:0003700;GO:000367	BP:regulation of transcription, DNA-templated;CC:nucleus;MF:transcription factor activity, sequence-specific DNA binding;MF:DNA binding;	------	------	------	------	ENOG4111P6E	K:Transcription	VAH65378.1	unnamed protein product [Triticum turgidum subsp. durum]	sp|Q5QMM3|WOX8_ORYSJ;	WUSCHEL-related homeobox 8 OS=Oryza sativa subsp. japonica OX=39947 GN=WOX8 PE=2 SV=1;	PF00046.31	Homeodomain	Homeodomain
TraesCS3A02G297200	17.4458	151.541	17.7675	Peroxidase [Source:UniProtKB/TrEMBL;Acc:A0A1D5V9V3]	GO:0006979;GO:0042744;GO:0005576;GO:0020037;GO:0046872;GO:000460	BP:response to oxidative stress;BP:hydrogen peroxide catabolic process;CC:extracellular region;MF:heme binding;MF:metal ion binding;MF:peroxidase activity;	K00430	E1.11.1.7	map00940	Phenylpropanoid biosynthesis	ENOG41106HZ	S:Function unknown	KAF7023818.1	hypothetical protein CFC21_036252 [Triticum aestivum]	sp|Q9FEQ8|PER2_MAIZE;	Peroxidase 2 OS=Zea mays OX=4577 GN=PER2 PE=2 SV=1;	PF00141.25	peroxidase	Peroxidase
TraesCS3A02G297100	14.4742	68.44	14.7192	Peroxidase [Source:UniProtKB/TrEMBL;Acc:A0A1D5V620]	GO:0006979;GO:0042744;GO:0005576;GO:0020037;GO:0046872;GO:000460	BP:response to oxidative stress;BP:hydrogen peroxide catabolic process;CC:extracellular region;MF:heme binding;MF:metal ion binding;MF:peroxidase activity;	K00430	E1.11.1.7	map00940	Phenylpropanoid biosynthesis	ENOG41106HZ	S:Function unknown	KAF7023817.1	hypothetical protein CFC21_036251 [Triticum aestivum]	sp|Q9FEQ8|PER2_MAIZE;	Peroxidase 2 OS=Zea mays OX=4577 GN=PER2 PE=2 SV=1;	PF00141.25	peroxidase	Peroxidase
TraesCS3A02G264900	1.91417	7.5475	4.0575	-	------	------	K09422	MYBP	------	------	COG5147	K:Transcription	KAF7023426.1	hypothetical protein CFC21_035937 [Triticum aestivum]	sp|Q9M2Y9|RAX3_ARATH;	Transcription factor RAX3 OS=Arabidopsis thaliana OX=3702 GN=RAX3 PE=2 SV=1;	PF00249.33;PF13921.8	Myb_DNA-binding;Myb_DNA-bind_6	Myb-like DNA-binding domain;Myb-like DNA-binding domain
TraesCS3A02G260500	3.48583	7.2775	3.91833	-	------	------	------	------	------	------	ENOG41121N2	O:Posttranslational modification, protein turnover, chaperones	XP_037406351.1	uncharacterized protein LOC119268755 isoform X1 [Triticum dicoccoides]	sp|O49500|MBR2_ARATH;	E3 ubiquitin-protein ligase MBR2 OS=Arabidopsis thaliana OX=3702 GN=MBR2 PE=1 SV=1;	PF13639.8;PF12678.9;PF13923.8;PF14634.8;PF00097.27;PF17123.7;PF13445.8;PF13920.8;PF12861.9	zf-RING_2;zf-rbx1;zf-C3HC4_2;zf-RING_5;zf-C3HC4;zf-RING_11;zf-RING_UBOX;zf-C3HC4_3;zf-ANAPC11	Ring finger domain;RING-H2 zinc finger domain;Zinc finger, C3HC4 type;zinc-RING finger domain;Zinc finger, C3HC4 type;RING-like zinc finger;RING-type zinc-finger;Zinc finger, C3HC4 type;Anaphase-promoting complex subunit 11 RING-H2 finger
TraesCS3A02G231600	1.56	10.0758	2.27667	-	GO:0006355;GO:0043565;GO:0000981;GO:000367	BP:regulation of transcription, DNA-templated;MF:sequence-specific DNA binding;MF:RNA polymerase II transcription factor activity, sequence-specific DNA binding;MF:DNA binding;	K09338	HD-ZIP	------	------	ENOG410Z2UE	K:Transcription	XP_037406033.1	homeobox-leucine zipper protein HOX3-like [Triticum dicoccoides]	sp|Q9XH38|HOX3_ORYSI;	Homeobox-leucine zipper protein HOX3 OS=Oryza sativa subsp. indica OX=39946 GN=HOX3 PE=1 SV=1;	PF00046.31;PF02183.20	Homeodomain;HALZ	Homeodomain;Homeobox associated leucine zipper
TraesCS3A02G231100	5.70417	20.8542	3.90083	-	------	------	------	------	------	------	ENOG41108J3	S:Function unknown	VAH62090.1	unnamed protein product [Triticum turgidum subsp. durum]	------	------	------	------	------
TraesCS3A02G214100	7.6425	17.4367	10.1408	-	GO:0006508;GO:0008233;GO:0004190;GO:001678	BP:proteolysis;MF:peptidase activity;MF:aspartic-type endopeptidase activity;MF:hydrolase activity;	K22683	APF2	------	------	ENOG410XNV7	O:Posttranslational modification, protein turnover, chaperones	KAF7029723.1	hypothetical protein CFC21_041404 [Triticum aestivum]	sp|Q9LNJ3|APF2_ARATH;	Aspartyl protease family protein 2 OS=Arabidopsis thaliana OX=3702 GN=APF2 PE=2 SV=1;	PF14543.8;PF14541.8;PF00026.25	TAXi_N;TAXi_C;Asp	Xylanase inhibitor N-terminal;Xylanase inhibitor C-terminal;Eukaryotic aspartyl protease
TraesCS3A02G175700	2.5075	4.2875	3.005	-	GO:0003723;GO:0046872;GO:0005524;GO:0003676;GO:000367	MF:RNA binding;MF:metal ion binding;MF:ATP binding;MF:nucleic acid binding;MF:DNA binding;	------	------	------	------	COG1643	L:Replication, recombination and repair	VAH59843.1	unnamed protein product [Triticum turgidum subsp. durum]	sp|Q1EHT7|C3H4_ORYSJ;	Zinc finger CCCH domain-containing protein 4 OS=Oryza sativa subsp. japonica OX=39947 GN=Os01g0256800 PE=2 SV=1;	PF00271.33;PF18345.3;PF18044.3;PF00270.31;PF00642.26;PF16131.7;PF05621.13	Helicase_C;zf_CCCH_4;zf-CCCH_4;DEAD;zf-CCCH;Torus;TniB	Helicase conserved C-terminal domain;Zinc finger domain;CCCH-type zinc finger;DEAD/DEAH box helicase;Zinc finger C-x8-C-x5-C-x3-H type;Torus domain;Bacterial TniB protein
TraesCS3A02G157200	3.41333	5.89583	4.19583	-	GO:006163	MF:ubiquitin conjugating enzyme activity;	K10581	UBE2O	map04120	Ubiquitin mediated proteolysis	COG5078	O:Posttranslational modification, protein turnover, chaperones	XP_037405030.1	putative ubiquitin-conjugating enzyme E2 38 isoform X1 [Triticum dicoccoides]	sp|Q8GY87|UBC26_ARATH;	Probable ubiquitin-conjugating enzyme E2 26 OS=Arabidopsis thaliana OX=3702 GN=UBC26 PE=2 SV=2;	PF00179.28	UQ_con	Ubiquitin-conjugating enzyme
TraesCS3A02G146800	3.3075	6.3275	2.6475	D-3-phosphoglycerate dehydrogenase [Source:UniProtKB/TrEMBL;Acc:A0A1D6DHY9]	GO:0006564;GO:0009570;GO:0051287;GO:0004617;GO:001661	BP:L-serine biosynthetic process;CC:chloroplast stroma;MF:NAD binding;MF:phosphoglycerate dehydrogenase activity;MF:oxidoreductase activity, acting on the CH-OH group of donors, NAD or NADP as acceptor;	K00058	serA, PHGDH	map00270;map00260	Cysteine and methionine metabolism;Glycine, serine and threonine metabolism	COG0111	E:Amino acid transport and metabolism	XP_037404917.1	D-3-phosphoglycerate dehydrogenase 3, chloroplastic-like [Triticum dicoccoides]	sp|O04130|SERA2_ARATH;	D-3-phosphoglycerate dehydrogenase 2, chloroplastic OS=Arabidopsis thaliana OX=3702 GN=PGDH2 PE=1 SV=2;	PF02826.21;PF00389.32;PF19304.1;PF01842.27;PF07991.14;PF00670.23	2-Hacid_dh_C;2-Hacid_dh;PGDH_inter;ACT;IlvN;AdoHcyase_NAD	D-isomer specific 2-hydroxyacid dehydrogenase, NAD binding domain;D-isomer specific 2-hydroxyacid dehydrogenase, catalytic domain;D-3-phosphoglycerate dehydrogenase intervening domain;ACT domain;Acetohydroxy acid isomeroreductase, NADPH-binding domain;S-adenosyl-L-homocysteine hydrolase, NAD binding domain
TraesCS3A02G129000	4.86917	11.3475	5.26	-	GO:0055085;GO:0016021;GO:0016020;GO:0000325;GO:0005774;GO:0042626;GO:0140359;GO:000552	BP:transmembrane transport;CC:integral component of membrane;CC:membrane;CC:plant-type vacuole;CC:vacuolar membrane;MF:ATPase activity, coupled to transmembrane movement of substances;MF:ABC-type transmembrane transporter activity;MF:ATP binding;	------	------	------	------	COG1132	V:Defense mechanisms	XP_037404667.1	ABC transporter C family member 3-like [Triticum dicoccoides]	sp|Q9LK64|AB3C_ARATH;	ABC transporter C family member 3 OS=Arabidopsis thaliana OX=3702 GN=ABCC3 PE=1 SV=1;	PF00664.25;PF00005.29;PF13555.8;PF01926.25;PF13476.8;PF13304.8	ABC_membrane;ABC_tran;AAA_29;MMR_HSR1;AAA_23;AAA_21	ABC transporter transmembrane region;ABC transporter;P-loop containing region of AAA domain;50S ribosome-binding GTPase;AAA domain;AAA domain, putative AbiEii toxin, Type IV TA system
TraesCS3A02G022800	3.28417	4.445	3.0125	-	GO:0043161;GO:0005737;GO:0005634;GO:000551	BP:proteasome-mediated ubiquitin-dependent protein catabolic process;CC:cytoplasm;CC:nucleus;MF:protein binding;	K23338	GID8	------	------	ENOG410XRG3	S:Function unknown	KAF7020358.1	hypothetical protein CFC21_033472 [Triticum aestivum]	sp|Q84WK5|GID8_ARATH;	Protein GID8 homolog OS=Arabidopsis thaliana OX=3702 GN=GID8 PE=1 SV=1;	PF10607.11;PF08513.13	CLTH;LisH	CTLH/CRA C-terminal to LisH motif domain;LisH
TraesCS2D02G527700	5.02583	9.0625	5.11583	-	------	------	------	------	------	------	------	------	KAF7019219.1	hypothetical protein CFC21_032420 [Triticum aestivum]	------	------	------	------	------
TraesCS2D02G516000	3.30667	5.6325	3.6225	-	GO:001687	MF:ligase activity;	------	------	------	------	ENOG41121N2	O:Posttranslational modification, protein turnover, chaperones	KAF7019076.1	hypothetical protein CFC21_032294 [Triticum aestivum]	sp|Q7XTV7|HIP1_ORYSJ;	Probable E3 ubiquitin-protein ligase HIP1 OS=Oryza sativa subsp. japonica OX=39947 GN=HIP1 PE=1 SV=2;	PF13639.8;PF13923.8;PF12678.9;PF00097.27;PF17123.7;PF13445.8;PF14634.8;PF13920.8	zf-RING_2;zf-C3HC4_2;zf-rbx1;zf-C3HC4;zf-RING_11;zf-RING_UBOX;zf-RING_5;zf-C3HC4_3	Ring finger domain;Zinc finger, C3HC4 type;RING-H2 zinc finger domain;Zinc finger, C3HC4 type;RING-like zinc finger;RING-type zinc-finger;zinc-RING finger domain;Zinc finger, C3HC4 type
TraesCS2D02G511800	2.10833	7.42	3.31417	-	GO:001678	MF:hydrolase activity;	K13051	ASRGL1, iaaA	map00460;map00250	Cyanoamino acid metabolism;Alanine, aspartate and glutamate metabolism	COG1446	E:Amino acid transport and metabolism	KAF7019017.1	hypothetical protein CFC21_032246 [Triticum aestivum]	sp|Q8GXG1|ASPGB_ARATH;	Probable isoaspartyl peptidase/L-asparaginase 2 OS=Arabidopsis thaliana OX=3702 GN=At3g16150 PE=2 SV=2;	PF01112.20	Asparaginase_2	Asparaginase
TraesCS2D02G499800	5.15333	6.07583	4.39917	-	GO:0009507;GO:000551	CC:chloroplast;MF:protein binding;	------	------	------	------	ENOG4110X8D	S:Function unknown	KAF7018877.1	hypothetical protein CFC21_032116 [Triticum aestivum]	sp|Q9C6Z0|FBK17_ARATH;	F-box/kelch-repeat protein At1g30090 OS=Arabidopsis thaliana OX=3702 GN=At1g30090 PE=2 SV=1;	PF01344.27;PF13964.8;PF07646.17;PF13418.8;PF00646.35;PF12937.9	Kelch_1;Kelch_6;Kelch_2;Kelch_4;F-box;F-box-like	Kelch motif;Kelch motif;Kelch motif;Galactose oxidase, central domain;F-box domain;F-box-like
TraesCS2D02G464700	4.05833	6.64	4.76917	-	GO:0050821;GO:0005737;GO:0031072;GO:0051087;GO:0005515;GO:000077	BP:protein stabilization;CC:cytoplasm;MF:heat shock protein binding;MF:chaperone binding;MF:protein binding;MF:adenyl-nucleotide exchange factor activity;	------	------	------	------	ENOG4111WNH	O:Posttranslational modification, protein turnover, chaperones	KAF7018466.1	hypothetical protein CFC21_031756 [Triticum aestivum]	sp|Q0WUQ1|BAG1_ARATH;	BAG family molecular chaperone regulator 1 OS=Arabidopsis thaliana OX=3702 GN=BAG1 PE=1 SV=1;	PF00240.25;PF02179.18	ubiquitin;BAG	Ubiquitin family;BAG domain
TraesCS2D02G460200	27.1658	102.405	32.6283	-	GO:0005618;GO:0048046;GO:0005576;GO:0030145;GO:0045735;GO:004687	CC:cell wall;CC:apoplast;CC:extracellular region;MF:manganese ion binding;MF:nutrient reservoir activity;MF:metal ion binding;	------	------	------	------	------	------	XP_020167492.1	germin-like protein 4-1 [Aegilops tauschii subsp. strangulata]	sp|Q7XSN6|GL41_ORYSJ;	Germin-like protein 4-1 OS=Oryza sativa subsp. japonica OX=39947 GN=Os04g0617900 PE=2 SV=2;	PF00190.24;PF07883.13	Cupin_1;Cupin_2	Cupin;Cupin domain
TraesCS2D02G451100	2.92333	5.2975	3.125	-	GO:0055085;GO:0000325;GO:0016021;GO:0016020;GO:0005774;GO:0140359;GO:0042626;GO:0000166;GO:000552	BP:transmembrane transport;CC:plant-type vacuole;CC:integral component of membrane;CC:membrane;CC:vacuolar membrane;MF:ABC-type transmembrane transporter activity;MF:ATPase activity, coupled to transmembrane movement of substances;MF:nucleotide binding;MF:ATP binding;	------	------	------	------	COG1132	V:Defense mechanisms	KAF7018331.1	hypothetical protein CFC21_031629 [Triticum aestivum]	sp|Q9M1C7|AB9C_ARATH;	ABC transporter C family member 9 OS=Arabidopsis thaliana OX=3702 GN=ABCC9 PE=2 SV=2;	PF00664.25;PF00005.29;PF01926.25;PF13555.8	ABC_membrane;ABC_tran;MMR_HSR1;AAA_29	ABC transporter transmembrane region;ABC transporter;50S ribosome-binding GTPase;P-loop containing region of AAA domain
TraesCS2D02G432700	3.96833	6.815	3.78	-	------	------	------	------	------	------	ENOG410YUES	S:Function unknown	XP_020163120.1	uncharacterized protein LOC109748506 [Aegilops tauschii subsp. strangulata]	------	------	------	------	------
TraesCS2D02G393500	2.66333	4.58417	2.61167	-	GO:0016021;GO:0016020;GO:000837	CC:integral component of membrane;CC:membrane;MF:acetylglucosaminyltransferase activity;	------	------	------	------	ENOG410YRJG	S:Function unknown	XP_020174291.1	uncharacterized protein LOC109759863 [Aegilops tauschii subsp. strangulata]	------	------	PF04646.14;PF02434.18	DUF604;Fringe	Protein of unknown function, DUF604;Fringe-like
TraesCS2D02G386100	6.56667	13.81	8.57167	-	GO:0030154;GO:0006355;GO:0005634;GO:0043565;GO:0003700;GO:000827	BP:cell differentiation;BP:regulation of transcription, DNA-templated;CC:nucleus;MF:sequence-specific DNA binding;MF:transcription factor activity, sequence-specific DNA binding;MF:zinc ion binding;	------	------	------	------	COG5641	K:Transcription	XP_020168016.1	GATA transcription factor 5 [Aegilops tauschii subsp. strangulata]	sp|Q9FH57|GATA5_ARATH;	GATA transcription factor 5 OS=Arabidopsis thaliana OX=3702 GN=GATA5 PE=2 SV=1;	PF00320.29	GATA	GATA zinc finger
TraesCS2D02G348900	3.4075	11.6833	3.85167	-	GO:0005975;GO:0016998;GO:0000272;GO:0008152;GO:0006032;GO:0016787;GO:0016798;GO:0008061;GO:000456	BP:carbohydrate metabolic process;BP:cell wall macromolecule catabolic process;BP:polysaccharide catabolic process;BP:metabolic process;BP:chitin catabolic process;MF:hydrolase activity;MF:hydrolase activity, acting on glycosyl bonds;MF:chitin binding;MF:chitinase activity;	K01183	E3.2.1.14	map00520	Amino sugar and nucleotide sugar metabolism	COG3979	G:Carbohydrate transport and metabolism	XP_020186271.2	chitinase 5 [Aegilops tauschii subsp. strangulata]	sp|O04138|CHI4_ORYSJ;	Chitinase 4 OS=Oryza sativa subsp. japonica OX=39947 GN=Cht4 PE=2 SV=2;	PF00182.21;PF00187.21	Glyco_hydro_19;Chitin_bind_1	Chitinase class I;Chitin recognition protein
TraesCS2D02G343900	3.02667	4.57417	3.4175	-	------	------	------	------	------	------	ENOG410YCBE	S:Function unknown	KAF7017059.1	hypothetical protein CFC21_030554 [Triticum aestivum]	------	------	PF03763.15	Remorin_C	Remorin, C-terminal region
TraesCS2D02G335900	6.33583	13.3858	8.69	-	GO:0005634;GO:0005776;GO:0008270;GO:000551	CC:nucleus;CC:autophagosome;MF:zinc ion binding;MF:protein binding;	K17987	NBR1	------	------	ENOG410ZTYM	S:Function unknown	SPT18760.1	unnamed protein product [Triticum aestivum]	sp|M1BJF6|JOKA2_SOLTU;	Protein JOKA2 OS=Solanum tuberosum OX=4113 GN=JOKA2 PE=1 SV=1;	PF16158.7;PF00569.19;PF00564.26	N_BRCA1_IG;ZZ;PB1	Ig-like domain from next to BRCA1 gene;Zinc finger, ZZ type;PB1 domain
TraesCS2D02G315500	7.05167	23.1083	7.11	-	GO:004687	MF:metal ion binding;	------	------	------	------	ENOG410Y7TC	S:Function unknown	KAF7016723.1	hypothetical protein CFC21_030261 [Triticum aestivum]	------	------	------	------	------
TraesCS2D02G313700	13.3292	36.1658	10.3	-	GO:0005829;GO:0004032;GO:0047834;GO:0016616;GO:001649	CC:cytosol;MF:aldito;MF:D-threo-aldose 1-dehydrogenase activity;MF:oxidoreductase activity, acting on the CH-OH group of donors, NAD or NADP as acceptor;MF:oxidoreductase activity;	K22374	DMAS1	------	------	COG0656	S:Function unknown	KAF7009389.1	hypothetical protein CFC21_023929 [Triticum aestivum]	sp|Q9SQ64|COR2_PAPSO;	Non-functional NADPH-dependent codeinone reductase 2 OS=Papaver somniferum OX=3469 GN=COR2 PE=1 SV=1;	PF00248.23	Aldo_ket_red	Aldo/keto reductase family
TraesCS2D02G301500	2.2875	4.70333	2.73583	-	GO:0006468;GO:0016021;GO:0005524;GO:000467	BP:protein phosphorylation;CC:integral component of membrane;MF:ATP binding;MF:protein kinase activity;	------	------	------	------	COG0515	T:Signal transduction mechanisms	KAF7016533.1	hypothetical protein CFC21_030128 [Triticum aestivum]	sp|Q9FX99|Y1497_ARATH;	Probable receptor-like protein kinase At1g49730 OS=Arabidopsis thaliana OX=3702 GN=At1g49730 PE=2 SV=1;	PF00069.27;PF07714.19;PF19160.2	Pkinase;PK_Tyr_Ser-Thr;SPARK	Protein kinase domain;Protein tyrosine and serine/threonine kinase;SPARK
TraesCS2D02G294700	7.03333	7.81167	5.43583	HVA22-like protein [Source:UniProtKB/TrEMBL;Acc:A0A341RAL4]	GO:0016021;GO:001602	CC:integral component of membrane;CC:membrane;	K17338	REEP1_2_3_4	------	------	COG5052	U:Intracellular trafficking, secretion, and vesicular transport	XP_020167696.1	putative HVA22-like protein g [Aegilops tauschii subsp. strangulata]	sp|Q8LE10|HA22I_ARATH;	HVA22-like protein i OS=Arabidopsis thaliana OX=3702 GN=HVA22I PE=2 SV=2;	PF03134.21	TB2_DP1_HVA22	TB2/DP1, HVA22 family
TraesCS2D02G277400	3.525	5.97083	2.11417	Protein DETOXIFICATION [Source:UniProtKB/TrEMBL;Acc:W5C2A7]	GO:0055085;GO:0016021;GO:0016020;GO:0015297;GO:0015238;GO:004291	BP:transmembrane transport;CC:integral component of membrane;CC:membrane;MF:antiporter activity;MF:drug transmembrane transporter activity;MF:xenobiotic transporter activity;	K03327	TC.MATE, SLC47A, norM, mdtK, dinF	------	------	COG0534	V:Defense mechanisms	XP_020152833.1	protein DETOXIFICATION 16 [Aegilops tauschii subsp. strangulata]	sp|Q9FHB6|DTX16_ARATH;	Protein DETOXIFICATION 16 OS=Arabidopsis thaliana OX=3702 GN=DTX16 PE=2 SV=1;	PF01554.20	MatE	MatE
TraesCS2D02G274600	5.97083	7.66083	5.36	-	GO:0006355;GO:0005634;GO:004698	BP:regulation of transcription, DNA-templated;CC:nucleus;MF:protein dimerization activity;	------	------	------	------	ENOG41107Q6;ENOG4111T9V	S:Function unknown;K:Transcription	XP_020162176.1	transcription factor bHLH62 isoform X1 [Aegilops tauschii subsp. strangulata]	sp|Q9SRT2|BH062_ARATH;	Transcription factor bHLH62 OS=Arabidopsis thaliana OX=3702 GN=BHLH62 PE=2 SV=1;	PF00010.28	HLH	Helix-loop-helix DNA-binding domain
TraesCS2D02G259100	4.97083	8.45083	5.22667	-	GO:0005634;GO:0005507;GO:0003677;GO:001649	CC:nucleus;MF:copper ion binding;MF:DNA binding;MF:oxidoreductase activity;	------	------	------	------	COG2132	Q:Secondary metabolites biosynthesis, transport and catabolism	XP_020173714.1	L-ascorbate oxidase homolog [Aegilops tauschii subsp. strangulata]	sp|P29162|ASOL_TOBAC;	L-ascorbate oxidase homolog OS=Nicotiana tabacum OX=4097 PE=2 SV=1;	PF07732.17;PF00394.24;PF07731.16	Cu-oxidase_3;Cu-oxidase;Cu-oxidase_2	Multicopper oxidase;Multicopper oxidase;Multicopper oxidase
TraesCS2D02G257900	4.82583	8.65417	6.05	-	------	------	------	------	------	------	------	------	KAF7015955.1	hypothetical protein CFC21_029669 [Triticum aestivum]	------	------	PF15365.8	PNRC	Proline-rich nuclear receptor coactivator motif
TraesCS2D02G257100	8.12167	15.76	10.0692	-	------	------	------	------	------	------	ENOG410YXN1	S:Function unknown	XP_020155449.1	glycine-rich cell wall structural protein [Aegilops tauschii subsp. strangulata]	------	------	------	------	------
TraesCS2D02G222100	3.845	9.59833	5.815	-	GO:0006468;GO:0016310;GO:0046777;GO:0016020;GO:0016021;GO:0005886;GO:0004672;GO:0000166;GO:0004674;GO:0016740;GO:0016301;GO:000552	BP:protein phosphorylation;BP:phosphorylation;BP:protein autophosphorylation;CC:membrane;CC:integral component of membrane;CC:plasma membrane;MF:protein kinase activity;MF:nucleotide binding;MF:protein serine/threonine kinase activity;MF:transferase activity;MF:kinase activity;MF:ATP binding;	------	------	------	------	COG0515	T:Signal transduction mechanisms	KAF7015422.1	hypothetical protein CFC21_029270 [Triticum aestivum]	sp|Q0D5R3|CRK6_ORYSJ;	Cysteine-rich receptor-like protein kinase 6 OS=Oryza sativa subsp. japonica OX=39947 GN=CRK6 PE=1 SV=1;	PF00069.27;PF07714.19;PF01657.19;PF12330.10	Pkinase;PK_Tyr_Ser-Thr;Stress-antifung;Haspin_kinase	Protein kinase domain;Protein tyrosine and serine/threonine kinase;Salt stress response/antifungal;Haspin like kinase domain
TraesCS2D02G221500	3.0075	7.87667	4.755	-	GO:0006468;GO:0016021;GO:0016020;GO:0004674;GO:0004672;GO:000552	BP:protein phosphorylation;CC:integral component of membrane;CC:membrane;MF:protein serine/threonine kinase activity;MF:protein kinase activity;MF:ATP binding;	------	------	------	------	COG0515	T:Signal transduction mechanisms	XP_020159703.1	cysteine-rich receptor-like protein kinase 10 isoform X2 [Aegilops tauschii subsp. strangulata]	sp|Q0D5R3|CRK6_ORYSJ;	Cysteine-rich receptor-like protein kinase 6 OS=Oryza sativa subsp. japonica OX=39947 GN=CRK6 PE=1 SV=1;	PF07714.19;PF00069.27;PF01657.19;PF17667.3	PK_Tyr_Ser-Thr;Pkinase;Stress-antifung;Pkinase_fungal	Protein tyrosine and serine/threonine kinase;Protein kinase domain;Salt stress response/antifungal;Fungal protein kinase
TraesCS2D02G190600	2.71	7.01917	2.86083	-	GO:0006468;GO:0005524;GO:000467	BP:protein phosphorylation;MF:ATP binding;MF:protein kinase activity;	------	------	------	------	ENOG410XPIR	T:Signal transduction mechanisms	XP_020146249.1	protein IMPAIRED IN BABA-INDUCED STERILITY 1 isoform X1 [Aegilops tauschii subsp. strangulata]	sp|F4ICB6|IBS1_ARATH;	Protein IMPAIRED IN BABA-INDUCED STERILITY 1 OS=Arabidopsis thaliana OX=3702 GN=IBS1 PE=3 SV=1;	PF00069.27;PF07714.19	Pkinase;PK_Tyr_Ser-Thr	Protein kinase domain;Protein tyrosine and serine/threonine kinase
TraesCS2D02G183900	2.55417	4.21833	3.25	-	GO:0006468;GO:0016021;GO:0005524;GO:0005515;GO:000467	BP:protein phosphorylation;CC:integral component of membrane;MF:ATP binding;MF:protein binding;MF:protein kinase activity;	------	------	------	------	COG0515;COG4886	T:Signal transduction mechanisms;S:Function unknown	KAF7014920.1	hypothetical protein CFC21_028845 [Triticum aestivum]	sp|Q9S7I6|RPK2_ARATH;	LRR receptor-like serine/threonine-protein kinase RPK2 OS=Arabidopsis thaliana OX=3702 GN=RPK2 PE=1 SV=1;	PF00069.27;PF07714.19;PF13855.8;PF12799.9;PF08263.14;PF01636.25	Pkinase;PK_Tyr_Ser-Thr;LRR_8;LRR_4;LRRNT_2;APH	Protein kinase domain;Protein tyrosine and serine/threonine kinase;Leucine rich repeat;Leucine Rich repeats;Leucine rich repeat N-terminal domain;Phosphotransferase enzyme family
TraesCS2D02G173600	6.93667	17.7092	6.47	-	GO:000550	MF:calcium ion binding;	K02183	CALM	map04626;map04070;map04016	Plant-pathogen interaction;Phosphatidylinositol signaling system;MAPK signaling pathway - plant	ENOG410YVNY	S:Function unknown	SPT16956.1	unnamed protein product [Triticum aestivum]	------	------	PF00036.34;PF13202.8;PF13405.8;PF13499.8;PF13833.8	EF-hand_1;EF-hand_5;EF-hand_6;EF-hand_7;EF-hand_8	EF hand;EF hand;EF-hand domain;EF-hand domain pair;EF-hand domain pair
TraesCS2D02G165500	5.2275	12.7758	6.48917	-	GO:0009611;GO:000486	BP:response to wounding;MF:serine-type endopeptidase inhibitor activity;	------	------	------	------	------	------	KAF7014673.1	hypothetical protein CFC21_028649 [Triticum aestivum]	sp|P01053|ICI2_HORVU;	Subtilisin-chymotrypsin inhibitor-2A OS=Hordeum vulgare OX=4513 PE=1 SV=2;	PF00280.20	potato_inhibit	Potato inhibitor I family
TraesCS2D02G100200	3.77333	19.92	6.37917	-	GO:0010311;GO:0048830;GO:0006355;GO:0005634;GO:0003700;GO:000367	BP:lateral root formation;BP:adventitious root development;BP:regulation of transcription, DNA-templated;CC:nucleus;MF:transcription factor activity, sequence-specific DNA binding;MF:DNA binding;	------	------	------	------	ENOG410YGSG	K:Transcription	KAF7013981.1	hypothetical protein CFC21_028018 [Triticum aestivum]	sp|A2XG77|WOX6_ORYSI;	WUSCHEL-related homeobox 6 OS=Oryza sativa subsp. indica OX=39946 GN=WOX6 PE=3 SV=1;	PF00046.31;PF12440.10	Homeodomain;MAGE_N	Homeodomain;Melanoma associated antigen family N terminal
TraesCS2D02G099800	2.06583	5.75917	2.72333	-	GO:0016021;GO:001602	CC:integral component of membrane;CC:membrane;	------	------	------	------	ENOG410ZUC9;COG0596	S:Function unknown;	XP_020161184.1	probable lysophospholipase BODYGUARD 4 [Aegilops tauschii subsp. strangulata]	sp|Q700D5|BDG4_ARATH;	Probable lysophospholipase BODYGUARD 4 OS=Arabidopsis thaliana OX=3702 GN=BDG4 PE=2 SV=1;	PF00561.22;PF12697.9;PF12146.10;PF06821.15	Abhydrolase_1;Abhydrolase_6;Hydrolase_4;Ser_hydrolase	alpha/beta hydrolase fold;Alpha/beta hydrolase family;Serine aminopeptidase, S33;Serine hydrolase
TraesCS2D02G060000	3.0025	10.0892	4.12917	-	GO:0016192;GO:0006886;GO:0006904;GO:0030141;GO:0005886;GO:001990	BP:vesicle-mediated transport;BP:intracellular protein transport;BP:vesicle docking involved in exocytosis;CC:secretory granule;CC:plasma membrane;MF:syntaxin binding;	K15292	STXBP1, MUNC18-1	------	------	COG5158	U:Intracellular trafficking, secretion, and vesicular transport	XP_020181957.1	probable protein transport Sec1a isoform X2 [Aegilops tauschii subsp. strangulata]	sp|Q7XWP3|SEC1A_ORYSJ;	Probable protein transport Sec1a OS=Oryza sativa subsp. japonica OX=39947 GN=Os04g0252400 PE=3 SV=2;	PF00995.25	Sec1	Sec1 family
TraesCS2D02G032800	6.36917	13.0775	9.87917	-	GO:001602	CC:integral component of membrane;	------	------	------	------	ENOG41105E3	S:Function unknown	KAF7013160.1	hypothetical protein CFC21_027274 [Triticum aestivum]	------	------	------	------	------
TraesCS2D02G014700	1.82083	8.8875	3.47417	-	GO:0016021;GO:0004497;GO:0016705;GO:0005506;GO:002003	CC:integral component of membrane;MF:monooxygenase activity;MF:oxidoreductase activity, acting on paired donors, with incorporation or reduction of molecular oxygen;MF:iron ion binding;MF:heme binding;	K09590	CYP85A1, BR6OX1	map00905	Brassinosteroid biosynthesis	COG2124	Q:Secondary metabolites biosynthesis, transport and catabolism	XP_020191918.1	cytochrome P450 85A1 [Aegilops tauschii subsp. strangulata]	sp|Q8GSQ1|C85A1_ORYSJ;	Cytochrome P450 85A1 OS=Oryza sativa subsp. japonica OX=39947 GN=CYP85A1 PE=1 SV=1;	PF00067.24	p450	Cytochrome P450
TraesCS2D02G014200	3.16	8.24083	2.56	-	GO:0016125;GO:0016132;GO:0010268;GO:0016021;GO:0004497;GO:0020037;GO:0016705;GO:0005506;GO:0046872;GO:001649	BP:sterol metabolic process;BP:brassinosteroid biosynthetic process;BP:brassinosteroid homeostasis;CC:integral component of membrane;MF:monooxygenase activity;MF:heme binding;MF:oxidoreductase activity, acting on paired donors, with incorporation or reduction of molecular oxygen;MF:iron ion binding;MF:metal ion binding;MF:oxidoreductase activity;	K09590	CYP85A1, BR6OX1	map00905	Brassinosteroid biosynthesis	COG2124	Q:Secondary metabolites biosynthesis, transport and catabolism	XP_020191916.1	cytochrome P450 85A1 [Aegilops tauschii subsp. strangulata]	sp|Q8GSQ1|C85A1_ORYSJ;	Cytochrome P450 85A1 OS=Oryza sativa subsp. japonica OX=39947 GN=CYP85A1 PE=1 SV=1;	PF00067.24	p450	Cytochrome P450
TraesCS2B02G603500	3.38833	7.18917	4.41167	-	GO:0006508;GO:0016020;GO:0009505;GO:000419	BP:proteolysis;CC:membrane;CC:plant-type cell wall;MF:aspartic-type endopeptidase activity;	------	------	------	------	ENOG410XNV7	O:Posttranslational modification, protein turnover, chaperones	KAF7012465.1	hypothetical protein CFC21_026653 [Triticum aestivum]	sp|Q940R4|ASP63_ARATH;	Probable aspartyl protease At4g16563 OS=Arabidopsis thaliana OX=3702 GN=At4g16563 PE=2 SV=1;	PF14541.8;PF14543.8;PF00026.25	TAXi_C;TAXi_N;Asp	Xylanase inhibitor C-terminal;Xylanase inhibitor N-terminal;Eukaryotic aspartyl protease
TraesCS2B02G589000	4.77	8.62583	5.33	-	------	------	------	------	------	------	ENOG4111IVV	S:Function unknown	KAF7012287.1	hypothetical protein CFC21_026495 [Triticum aestivum]	sp|A2WYS8|PIR7A_ORYSI;	Probable esterase PIR7A OS=Oryza sativa subsp. indica OX=39946 GN=PIR7A PE=3 SV=2;	PF12697.9;PF00561.22;PF12146.10;PF06821.15	Abhydrolase_6;Abhydrolase_1;Hydrolase_4;Ser_hydrolase	Alpha/beta hydrolase family;alpha/beta hydrolase fold;Serine aminopeptidase, S33;Serine hydrolase
TraesCS2B02G505000	3.77417	6.75333	5.3275	Protein CutA, chloroplastic [Source:Projected from Arabidopsis thaliana (AT2G33740) UniProtKB/Swiss-Prot;Acc:P93009]	GO:0070207;GO:0010038;GO:0016021;GO:0009507;GO:000550	BP:protein homotrimerization;BP:response to metal ion;CC:integral component of membrane;CC:chloroplast;MF:copper ion binding;	K03926	cutA	------	------	COG1324	P:Inorganic ion transport and metabolism	XP_037487341.1	protein CutA 1, chloroplastic isoform X1 [Triticum dicoccoides]	sp|Q109R6|CUTA1_ORYSJ;	Protein CutA 1, chloroplastic OS=Oryza sativa subsp. japonica OX=39947 GN=CUTA1 PE=1 SV=1;	PF03091.17	CutA1	CutA1 divalent ion tolerance protein
TraesCS2B02G485500	4.28417	7.54333	5.57167	-	GO:0050821;GO:0005737;GO:0031072;GO:0051087;GO:0005515;GO:000077	BP:protein stabilization;CC:cytoplasm;MF:heat shock protein binding;MF:chaperone binding;MF:protein binding;MF:adenyl-nucleotide exchange factor activity;	------	------	------	------	ENOG4111WNH	O:Posttranslational modification, protein turnover, chaperones	XP_037487239.1	BAG family molecular chaperone regulator 1-like [Triticum dicoccoides]	sp|Q0WUQ1|BAG1_ARATH;	BAG family molecular chaperone regulator 1 OS=Arabidopsis thaliana OX=3702 GN=BAG1 PE=1 SV=1;	PF00240.25;PF02179.18	ubiquitin;BAG	Ubiquitin family;BAG domain
TraesCS2B02G470400	2.68167	4.29833	2.74583	-	GO:0009535;GO:0016021;GO:000970	CC:chloroplast thylakoid membrane;CC:integral component of membrane;CC:chloroplast inner membrane;	------	------	------	------	ENOG41129VE	S:Function unknown	KAF7010945.1	hypothetical protein CFC21_025306 [Triticum aestivum]	------	------	------	------	------
TraesCS2B02G445300	1.9525	6.13333	2.53	-	GO:0010241;GO:0009686;GO:0016021;GO:0004497;GO:0020037;GO:0016705;GO:0005506;GO:005261	BP:ent-kaurene oxidation to kaurenoic acid;BP:gibberellin biosynthetic process;CC:integral component of membrane;MF:monooxygenase activity;MF:heme binding;MF:oxidoreductase activity, acting on paired donors, with incorporation or reduction of molecular oxygen;MF:iron ion binding;MF:ent-kaurene oxidase activity;	K04122	GA3, CYP701	map00904	Diterpenoid biosynthesis	COG2124	Q:Secondary metabolites biosynthesis, transport and catabolism	XP_037486907.1	ent-kaurene oxidase 2-like [Triticum dicoccoides]	sp|Q5Z5R4|C7016_ORYSJ;	Ent-kaurene oxidase 2 OS=Oryza sativa subsp. japonica OX=39947 GN=CYP701A6 PE=1 SV=1;	PF00067.24	p450	Cytochrome P450
TraesCS2B02G439700	5.705	34.5183	8.4475	-	------	------	------	------	------	------	------	------	------	------	------	------	PF12734.9	CYSTM	Cysteine-rich TM module stress tolerance
TraesCS2B02G406400	3.58417	6.93917	5.16333	-	GO:0030154;GO:0006355;GO:0005634;GO:0043565;GO:0003700;GO:000827	BP:cell differentiation;BP:regulation of transcription, DNA-templated;CC:nucleus;MF:sequence-specific DNA binding;MF:transcription factor activity, sequence-specific DNA binding;MF:zinc ion binding;	------	------	------	------	COG5641	K:Transcription	KAF7010218.1	hypothetical protein CFC21_024663 [Triticum aestivum]	sp|Q9FH57|GATA5_ARATH;	GATA transcription factor 5 OS=Arabidopsis thaliana OX=3702 GN=GATA5 PE=2 SV=1;	PF00320.29	GATA	GATA zinc finger
TraesCS2B02G365900	3.38917	5.78417	3.25417	-	GO:0006468;GO:0005737;GO:0005634;GO:0005886;GO:0004674;GO:0004672;GO:000552	BP:protein phosphorylation;CC:cytoplasm;CC:nucleus;CC:plasma membrane;MF:protein serine/threonine kinase activity;MF:protein kinase activity;MF:ATP binding;	K20714	OXI1	map04016	MAPK signaling pathway - plant	ENOG410XQ0C	T:Signal transduction mechanisms	VAH48981.1	unnamed protein product [Triticum turgidum subsp. durum]	sp|Q9LSF1|OXI1_ARATH;	Serine/threonine-protein kinase OXI1 OS=Arabidopsis thaliana OX=3702 GN=OXI1 PE=1 SV=1;	PF00069.27;PF07714.19	Pkinase;PK_Tyr_Ser-Thr	Protein kinase domain;Protein tyrosine and serine/threonine kinase
TraesCS2B02G354100	7.4675	13.9758	7.08	-	GO:0010252;GO:0009852;GO:0051213;GO:0050302;GO:0046872;GO:001649	BP:auxin homeostasis;BP:auxin catabolic process;MF:dioxygenase activity;MF:indole-3-acetaldehyde oxidase activity;MF:metal ion binding;MF:oxidoreductase activity;	K23947	DAO	map00380	Tryptophan metabolism	COG3491	S:Function unknown	KAF7009630.1	hypothetical protein CFC21_024143 [Triticum aestivum]	sp|Q01IX6|DAO_ORYSI;	2-oxoglutarate-dependent dioxygenase DAO OS=Oryza sativa subsp. indica OX=39946 GN=DAO PE=3 SV=1;	PF03171.22;PF14226.8	2OG-FeII_Oxy;DIOX_N	2OG-F;non-haem dioxygenase in morphine synthesis N-terminal
TraesCS2B02G335800	5.92167	19.5633	5.7875	-	GO:004687	MF:metal ion binding;	------	------	------	------	ENOG410Y7TC	S:Function unknown	XP_037485807.1	dynein assembly factor 1, axonemal-like [Triticum dicoccoides]	------	------	------	------	------
TraesCS2B02G323600	2.4475	9.60333	3.91083	RING-type E3 ubiquitin transferase [Source:UniProtKB/TrEMBL;Acc:A0A341QRQ2]	GO:0016567;GO:000484	BP:protein ubiquitination;MF:ubiquitin-protein transferase activity;	------	------	------	------	ENOG410YFJY	S:Function unknown	XP_037485692.1	U-box domain-containing protein 26-like [Triticum dicoccoides]	sp|Q9FXA4|PUB26_ARATH;	U-box domain-containing protein 26 OS=Arabidopsis thaliana OX=3702 GN=PUB26 PE=2 SV=1;	PF04564.17;PF15227.8;PF13445.8;PF11789.10;PF13923.8	U-box;zf-C3HC4_4;zf-RING_UBOX;zf-Nse;zf-C3HC4_2	U-box domain;zinc finger of C3HC4-type, RING;RING-type zinc-finger;Zinc-finger of the MIZ type in Nse subunit;Zinc finger, C3HC4 type
TraesCS2B02G299900	4.10667	6.79917	4.42083	-	------	------	------	------	------	------	ENOG411299P	S:Function unknown	XP_020196527.1	uncharacterized protein LOC109782332 [Aegilops tauschii subsp. strangulata]	------	------	------	------	------
TraesCS2B02G290000	2.8075	4.25667	3.62083	-	GO:0016020;GO:0008375;GO:0015020;GO:001675	CC:membrane;MF:acetylglucosaminyltransferase activity;MF:glucuronosyltransferase activity;MF:transferase activity, transferring glycosyl groups;	------	------	------	------	ENOG410XQ7M	S:Function unknown	KAF7008816.1	hypothetical protein CFC21_023491 [Triticum aestivum]	sp|Q9FLD7|GT14A_ARATH;	Beta-glucuronosyltransferase GlcAT14A OS=Arabidopsis thaliana OX=3702 GN=GLCAT14A PE=2 SV=1;	PF02485.23	Branch	Core-2/I-Branching enzyme
TraesCS2B02G277000	2.33667	5.07583	3.08333	-	------	------	------	------	------	------	------	------	VAH46468.1	unnamed protein product [Triticum turgidum subsp. durum]	------	------	PF15365.8	PNRC	Proline-rich nuclear receptor coactivator motif
TraesCS2B02G276200	3.59833	5.29	4.17667	-	------	------	------	------	------	------	------	------	VAH31117.1	unnamed protein product [Triticum turgidum subsp. durum]	------	------	PF15365.8	PNRC	Proline-rich nuclear receptor coactivator motif
TraesCS2B02G260500	5.00417	8.73333	5.9875	H-type thioredoxin, Regulation of the apoplastic reactive oxygen species, Stress respons [Source: Projected from Oryza sativa (Os07g0186000)]	GO:0010497;GO:0043086;GO:0006979;GO:0009409;GO:0006662;GO:0005737;GO:0016671;GO:0015035;GO:000485	BP:plasmodesmata-mediated intercellular transport;BP:negative regulation of catalytic activity;BP:response to oxidative stress;BP:response to cold;BP:glycerol ether metabolic process;CC:cytoplasm;MF:oxidoreductase activity, acting on a sulfur group of donors, disulfide as acceptor;MF:protein disulfide oxidoreductase activity;MF:enzyme inhibitor activity;	K03671	trxA	------	------	COG0526	O:Posttranslational modification, protein turnover, chaperones	KAF7008450.1	hypothetical protein CFC21_023198 [Triticum aestivum]	sp|Q0D840|TRXH1_ORYSJ;	Thioredoxin H1 OS=Oryza sativa subsp. japonica OX=39947 GN=TRXH PE=1 SV=1;	PF00085.22;PF13098.8;PF14595.8;PF13899.8;PF04756.15	Thioredoxin;Thioredoxin_2;Thioredoxin_9;Thioredoxin_7;OST3_OST6	Thioredoxin;Thioredoxin-like domain;Thioredoxin;Thioredoxin-like;OST3 / OST6 family, transporter family
TraesCS2B02G242100	4.39	8.235	5.61167	-	GO:0006468;GO:0016021;GO:0004674;GO:0005524;GO:000467	BP:protein phosphorylation;CC:integral component of membrane;MF:protein serine/threonine kinase activity;MF:ATP binding;MF:protein kinase activity;	------	------	------	------	COG0515	T:Signal transduction mechanisms	KAF7111636.1	hypothetical protein CFC21_111622 [Triticum aestivum]	sp|Q0D5R3|CRK6_ORYSJ;	Cysteine-rich receptor-like protein kinase 6 OS=Oryza sativa subsp. japonica OX=39947 GN=CRK6 PE=1 SV=1;	PF07714.19;PF00069.27;PF01657.19	PK_Tyr_Ser-Thr;Pkinase;Stress-antifung	Protein tyrosine and serine/threonine kinase;Protein kinase domain;Salt stress response/antifungal
TraesCS2B02G241600	2.33167	4.51667	3.2525	-	GO:0006468;GO:0016021;GO:0005886;GO:0004672;GO:0004674;GO:000552	BP:protein phosphorylation;CC:integral component of membrane;CC:plasma membrane;MF:protein kinase activity;MF:protein serine/threonine kinase activity;MF:ATP binding;	------	------	------	------	COG0515	T:Signal transduction mechanisms	VAH45120.1	unnamed protein product [Triticum turgidum subsp. durum]	sp|Q0D5R3|CRK6_ORYSJ;	Cysteine-rich receptor-like protein kinase 6 OS=Oryza sativa subsp. japonica OX=39947 GN=CRK6 PE=1 SV=1;	PF00069.27;PF07714.19;PF01657.19;PF12330.10	Pkinase;PK_Tyr_Ser-Thr;Stress-antifung;Haspin_kinase	Protein kinase domain;Protein tyrosine and serine/threonine kinase;Salt stress response/antifungal;Haspin like kinase domain
TraesCS2B02G234800	3.18	6.22083	4.0625	Putative cyclin-D6-1 [Source:Projected from Arabidopsis thaliana (AT4G03270) UniProtKB/Swiss-Prot;Acc:Q9ZR04]	GO:0000079;GO:0044772;GO:0007049;GO:0051301;GO:0005737;GO:0005634;GO:0000307;GO:001653	BP:regulation of cyclin-dependent protein serine/threonine kinase activity;BP:mitotic cell cycle phase transition;BP:cell cycle;BP:cell division;CC:cytoplasm;CC:nucleus;CC:cyclin-dependent protein kinase holoenzyme complex;MF:cyclin-dependent protein serine/threonine kinase regulator activity;	K18812	CYCD6	------	------	ENOG410XRKC	D:Cell cycle control, cell division, chromosome partitioning	VAH29103.1	unnamed protein product [Triticum turgidum subsp. durum]	sp|Q69S43|CCD61_ORYSJ;	Cyclin-D6-1 OS=Oryza sativa subsp. japonica OX=39947 GN=CYCD6-1 PE=2 SV=1;	PF00134.25;PF02984.21	Cyclin_N;Cyclin_C	Cyclin, N-terminal domain;Cyclin, C-terminal domain
TraesCS2B02G225300	2.78083	4.06333	3.52083	Ribosome-recycling factor, chloroplastic [Source:Projected from Arabidopsis thaliana (AT3G63190) UniProtKB/Swiss-Prot;Acc:Q9M1X0]	GO:0050832;GO:0032544;GO:0009658;GO:0009793;GO:0042742;GO:0006412;GO:0009579;GO:0009570;GO:0005739;GO:0009507;GO:0043023;GO:000550	BP:defense response to fungus;BP:plastid translation;BP:chloroplast organization;BP:embryo development ending in seed dormancy;BP:defense response to bacterium;BP:translation;CC:thylakoid;CC:chloroplast stroma;CC:mitochondrion;CC:chloroplast;MF:ribosomal large subunit binding;MF:copper ion binding;	K02838	frr, MRRF, RRF	------	------	COG0233	J:Translation, ribosomal structure and biogenesis	XP_037484471.1	ribosome-recycling factor, chloroplastic-like [Triticum dicoccoides]	sp|A2YMU2|RRFC_ORYSI;	Ribosome-recycling factor, chloroplastic OS=Oryza sativa subsp. indica OX=39946 GN=OsI_26546 PE=1 SV=2;	PF01765.21	RRF	Ribosome recycling factor
TraesCS2B02G209300	2.92083	6.11917	3.47167	-	GO:0006468;GO:0005524;GO:000467	BP:protein phosphorylation;MF:ATP binding;MF:protein kinase activity;	------	------	------	------	ENOG410XPIR	T:Signal transduction mechanisms	KAF7007732.1	hypothetical protein CFC21_022640 [Triticum aestivum]	sp|F4ICB6|IBS1_ARATH;	Protein IMPAIRED IN BABA-INDUCED STERILITY 1 OS=Arabidopsis thaliana OX=3702 GN=IBS1 PE=3 SV=1;	PF00069.27;PF07714.19	Pkinase;PK_Tyr_Ser-Thr	Protein kinase domain;Protein tyrosine and serine/threonine kinase
TraesCS2B02G208200	4.135	5.77083	4.28583	-	------	------	K24869	SCAPER	------	------	ENOG410XPXB	S:Function unknown	KAF7007723.1	hypothetical protein CFC21_022634 [Triticum aestivum]	sp|Q9BY12|SCAPE_HUMAN;	S phase cyclin A-associated protein in the endoplasmic reticulum OS=Homo sapiens OX=9606 GN=SCAPER PE=1 SV=2;	PF16501.7	SCAPER_N	S phase cyclin A-associated protein in the endoplasmic reticulum
TraesCS2B02G202900	3.08417	5.21917	3.88	-	GO:0006468;GO:0016021;GO:0005524;GO:0005515;GO:000467	BP:protein phosphorylation;CC:integral component of membrane;MF:ATP binding;MF:protein binding;MF:protein kinase activity;	------	------	------	------	COG0515	T:Signal transduction mechanisms	KAF7007645.1	hypothetical protein CFC21_022565 [Triticum aestivum]	sp|Q9S7I6|RPK2_ARATH;	LRR receptor-like serine/threonine-protein kinase RPK2 OS=Arabidopsis thaliana OX=3702 GN=RPK2 PE=1 SV=1;	PF00069.27;PF07714.19;PF13855.8;PF12799.9;PF08263.14;PF01636.25	Pkinase;PK_Tyr_Ser-Thr;LRR_8;LRR_4;LRRNT_2;APH	Protein kinase domain;Protein tyrosine and serine/threonine kinase;Leucine rich repeat;Leucine Rich repeats;Leucine rich repeat N-terminal domain;Phosphotransferase enzyme family
TraesCS2B02G169300	8.20167	16.0858	9.36	-	GO:0006869;GO:0016021;GO:000828	BP:lipid transport;CC:integral component of membrane;MF:lipid binding;	------	------	------	------	COG5038	S:Function unknown	KAF7007274.1	hypothetical protein CFC21_022222 [Triticum aestivum]	sp|Q93XX4|C2D61_ARATH;	C2 domain-containing protein At1g53590 OS=Arabidopsis thaliana OX=3702 GN=NTMC2T6.1 PE=1 SV=2;	PF00168.32;PF17047.7	C2;SMP_LBD	C2 domain;Synaptotagmin-like mitochondrial-lipid-binding domain
TraesCS2B02G134100	5.81583	11.805	6.97667	-	GO:0030001;GO:004687	BP:metal ion transport;MF:metal ion binding;	------	------	------	------	COG2608	S:Function unknown	KAF7006863.1	hypothetical protein CFC21_021863 [Triticum aestivum]	sp|Q84J88|HIP36_ARATH;	Heavy metal-associated isoprenylated plant protein 36 OS=Arabidopsis thaliana OX=3702 GN=HIPP36 PE=1 SV=1;	PF00403.28	HMA	Heavy-metal-associated domain
TraesCS2B02G117900	3.8525	17.785	7.60333	-	GO:0048830;GO:0010311;GO:0005634;GO:0003700;GO:000367	BP:adventitious root development;BP:lateral root formation;CC:nucleus;MF:transcription factor activity, sequence-specific DNA binding;MF:DNA binding;	------	------	------	------	ENOG410YGSG	K:Transcription	XP_037488722.1	WUSCHEL-related homeobox 11-like [Triticum dicoccoides]	sp|A2XG77|WOX6_ORYSI;	WUSCHEL-related homeobox 6 OS=Oryza sativa subsp. indica OX=39946 GN=WOX6 PE=3 SV=1;	PF00046.31;PF12440.10	Homeodomain;MAGE_N	Homeodomain;Melanoma associated antigen family N terminal
TraesCS2B02G048700	2.55583	5.87	3.94583	-	GO:0006527;GO:0042742;GO:0033389;GO:0009507;GO:0004053;GO:0016813;GO:0008783;GO:0050897;GO:004687	BP:arginine catabolic process;BP:defense response to bacterium;BP:putrescine biosynthetic process from arginine, using agmatinase;CC:chloroplast;MF:arginase activity;MF:hydrolase activity, acting on carbon-nitroge;MF:agmatinase activity;MF:cobalt ion binding;MF:metal ion binding;	K01476	E3.5.3.1, rocF, arg	map00220;map00330	Arginine biosynthesis;Arginine and proline metabolism	COG0010	E:Amino acid transport and metabolism	KAF7005876.1	hypothetical protein CFC21_020975 [Triticum aestivum]	sp|B8AU84|ARGI1_ORYSI;	Arginase 1, mitochondrial OS=Oryza sativa subsp. indica OX=39946 GN=B0616E02-H0507E05.7 PE=1 SV=1;	PF00491.23	Arginase	Arginase family
TraesCS2B02G004500	2.66583	10.1442	3.1325	-	GO:0016021;GO:0004497;GO:0016705;GO:0005506;GO:002003	CC:integral component of membrane;MF:monooxygenase activity;MF:oxidoreductase activity, acting on paired donors, with incorporation or reduction of molecular oxygen;MF:iron ion binding;MF:heme binding;	K09590	CYP85A1, BR6OX1	map00905	Brassinosteroid biosynthesis	COG2124	Q:Secondary metabolites biosynthesis, transport and catabolism	KAF7005374.1	hypothetical protein CFC21_020501 [Triticum aestivum]	sp|Q8GSQ1|C85A1_ORYSJ;	Cytochrome P450 85A1 OS=Oryza sativa subsp. japonica OX=39947 GN=CYP85A1 PE=1 SV=1;	PF00067.24	p450	Cytochrome P450
TraesCS2A02G580600	4.87833	7.22167	4.26417	-	GO:0006364;GO:0006378;GO:0006397;GO:0005634;GO:0005849;GO:0005829;GO:0016787;GO:0003723;GO:000372	BP:rRNA processing;BP:mRNA polyadenylation;BP:mRNA processing;CC:nucleus;CC:mRNA cleavage factor complex;CC:cytosol;MF:hydrolase activity;MF:RNA binding;MF:mRNA binding;	K14397	NUDT21, CPSF5, CFIM25	map03015	mRNA surveillance pathway	ENOG410XS8Z	A:RNA processing and modification	XP_020159349.1	pre-mRNA cleavage factor Im 25 kDa subunit 2 [Aegilops tauschii subsp. strangulata]	sp|Q8GXS3|CFIS2_ARATH;	Pre-mRNA cleavage factor Im 25 kDa subunit 2 OS=Arabidopsis thaliana OX=3702 GN=CFIS2 PE=1 SV=1;	PF13869.8	NUDIX_2	Nucleotide hydrolase
TraesCS2A02G524800	4.34	6.825	4.12	-	------	------	------	------	------	------	ENOG41105WF	S:Function unknown	KAF7004486.1	hypothetical protein CFC21_019694 [Triticum aestivum]	------	------	------	------	------
TraesCS2A02G484100	5.63083	10.725	6.17833	-	GO:0042546;GO:0005975;GO:0071555;GO:0010411;GO:0005618;GO:0048046;GO:0016762;GO:000455	BP:cell wall biogenesis;BP:carbohydrate metabolic process;BP:cell wall organization;BP:xyloglucan metabolic process;CC:cell wall;CC:apoplast;MF:xylogluca;MF:hydrolase activity, hydrolyzing O-glycosyl compounds;	K08235	E2.4.1.207	------	------	ENOG410YBFU;ENOG41104XA	G:Carbohydrate transport and metabolism;	XP_037479523.1	uncharacterized protein LOC119356639 isoform X1 [Triticum dicoccoides]	sp|Q8LDW9|XTH9_ARATH;	Xyloglucan endotransglucosylase/hydrolase protein 9 OS=Arabidopsis thaliana OX=3702 GN=XTH9 PE=2 SV=2;	PF00722.23	Glyco_hydro_16	Glycosyl hydrolases family 16
TraesCS2A02G480200	2.80167	4.645	3.48333	Protein CutA, chloroplastic [Source:Projected from Arabidopsis thaliana (AT2G33740) UniProtKB/Swiss-Prot;Acc:P93009]	GO:0070207;GO:0010038;GO:0016021;GO:0009507;GO:000550	BP:protein homotrimerization;BP:response to metal ion;CC:integral component of membrane;CC:chloroplast;MF:copper ion binding;	K03926	cutA	------	------	COG1324	P:Inorganic ion transport and metabolism	XP_037479474.1	protein CutA 1, chloroplastic-like isoform X1 [Triticum dicoccoides]	sp|Q109R6|CUTA1_ORYSJ;	Protein CutA 1, chloroplastic OS=Oryza sativa subsp. japonica OX=39947 GN=CUTA1 PE=1 SV=1;	PF03091.17	CutA1	CutA1 divalent ion tolerance protein
TraesCS2A02G463500	3.56417	5.76417	3.93917	-	GO:0050821;GO:0005737;GO:0031072;GO:0051087;GO:0005515;GO:000077	BP:protein stabilization;CC:cytoplasm;MF:heat shock protein binding;MF:chaperone binding;MF:protein binding;MF:adenyl-nucleotide exchange factor activity;	------	------	------	------	ENOG4111WNH	O:Posttranslational modification, protein turnover, chaperones	XP_037479355.1	BAG family molecular chaperone regulator 1-like [Triticum dicoccoides]	sp|Q0WUQ1|BAG1_ARATH;	BAG family molecular chaperone regulator 1 OS=Arabidopsis thaliana OX=3702 GN=BAG1 PE=1 SV=1;	PF00240.25;PF02179.18	ubiquitin;BAG	Ubiquitin family;BAG domain
TraesCS2A02G459800	2.03583	50.1533	3.0025	-	GO:0048046;GO:0005618;GO:0005576;GO:0030145;GO:004573	CC:apoplast;CC:cell wall;CC:extracellular region;MF:manganese ion binding;MF:nutrient reservoir activity;	------	------	------	------	ENOG4110480	S:Function unknown	XP_037479328.1	germin-like protein 4-1 [Triticum dicoccoides]	sp|Q7XSN6|GL41_ORYSJ;	Germin-like protein 4-1 OS=Oryza sativa subsp. japonica OX=39947 GN=Os04g0617900 PE=2 SV=2;	PF00190.24;PF07883.13	Cupin_1;Cupin_2	Cupin;Cupin domain
TraesCS2A02G404500	3.46417	5.54333	4.4625	-	GO:0006355;GO:0006351;GO:0005634;GO:0003700;GO:000367	BP:regulation of transcription, DNA-templated;BP:transcription, DNA-templated;CC:nucleus;MF:transcription factor activity, sequence-specific DNA binding;MF:DNA binding;	------	------	------	------	ENOG410YJ4A	K:Transcription	KAF7002997.1	hypothetical protein CFC21_018389 [Triticum aestivum]	sp|O81791|RKD5_ARATH;	Protein RKD5 OS=Arabidopsis thaliana OX=3702 GN=RKD5 PE=3 SV=1;	PF02042.17	RWP-RK	RWP-RK domain
TraesCS2A02G395300	2.62	4.56583	2.80417	-	GO:0016925;GO:0005634;GO:006165	BP:protein sumoylation;CC:nucleus;MF:SUMO conjugating enzyme activity;	K10577	UBE2I, UBC9	map04120;map03013	Ubiquitin mediated proteolysis;Nucleocytoplasmic transport	COG5078	O:Posttranslational modification, protein turnover, chaperones	XP_037481758.1	SUMO-conjugating enzyme SCE1-like isoform X1 [Triticum dicoccoides]	sp|Q42551|SCE1_ARATH;	SUMO-conjugating enzyme SCE1 OS=Arabidopsis thaliana OX=3702 GN=SCE1 PE=1 SV=1;	PF00179.28	UQ_con	Ubiquitin-conjugating enzyme
TraesCS2A02G383300	2.955	5.195	2.905	-	GO:0009143;GO:0042262;GO:0006253;GO:0005829;GO:0047840;GO:0047429;GO:0000287;GO:004687	BP:nucleoside triphosphate catabolic process;BP:DNA protection;BP:dCTP catabolic process;CC:cytosol;MF:dCTP diphosphatase activity;MF:nucleoside-triphosphate diphosphatase activity;MF:magnesium ion binding;MF:metal ion binding;	K16904	DCTPP1	map00240	Pyrimidine metabolism	COG1694	S:Function unknown	KAF7002742.1	hypothetical protein CFC21_018183 [Triticum aestivum]	sp|Q32KY6|DCTP1_BOVIN;	dCTP pyrophosphatase 1 OS=Bos taurus OX=9913 GN=DCTPP1 PE=2 SV=1;	PF12643.9;PF03819.19	MazG-like;MazG	MazG-like family;MazG nucleotide pyrophosphohydrolase domain
TraesCS2A02G335200	4.32583	10.4333	6.5275	-	GO:0000162;GO:0004640;GO:0003824;GO:000442	BP:tryptophan biosynthetic process;MF:phosphoribosylanthranilate isomerase activity;MF:catalytic activity;MF:indole-3-glycerol-phosphate synthase activity;	K01609	trpC	map00400	Phenylalanine, tyrosine and tryptophan biosynthesis	COG0134	E:Amino acid transport and metabolism	VAH33189.1	unnamed protein product [Triticum turgidum subsp. durum]	sp|P49572|TRPC_ARATH;	Indole-3-glycerol phosphate synthase, chloroplastic OS=Arabidopsis thaliana OX=3702 GN=IGPS PE=1 SV=2;	PF00218.23	IGPS	Indole-3-glycerol phosphate synthase
TraesCS2A02G266900	11.1408	22.3992	14.68	-	------	------	------	------	------	------	ENOG410YXN1	S:Function unknown	XP_037477408.1	glycine-rich cell wall structural protein-like [Triticum dicoccoides]	------	------	------	------	------
TraesCS2A02G216500	2.75	5.3975	3.17417	-	GO:0006468;GO:0016021;GO:0005886;GO:0004672;GO:0004674;GO:000552	BP:protein phosphorylation;CC:integral component of membrane;CC:plasma membrane;MF:protein kinase activity;MF:protein serine/threonine kinase activity;MF:ATP binding;	------	------	------	------	COG0515	T:Signal transduction mechanisms	KAF7000637.1	hypothetical protein CFC21_016500 [Triticum aestivum]	sp|Q0D5R3|CRK6_ORYSJ;	Cysteine-rich receptor-like protein kinase 6 OS=Oryza sativa subsp. japonica OX=39947 GN=CRK6 PE=1 SV=1;	PF07714.19;PF00069.27;PF01657.19;PF14610.8;PF17667.3	PK_Tyr_Ser-Thr;Pkinase;Stress-antifung;Psg1;Pkinase_fungal	Protein tyrosine and serine/threonine kinase;Protein kinase domain;Salt stress response/antifungal;Ykl077w/Psg1;Fungal protein kinase
TraesCS2A02G193100	4.44167	6.11833	5.22333	-	------	------	------	------	------	------	ENOG4111H24	S:Function unknown	KAF7000360.1	hypothetical protein CFC21_016283 [Triticum aestivum]	------	------	------	------	------
TraesCS2A02G182800	4.595	7.59583	4.57667	-	GO:0006468;GO:0005524;GO:000467	BP:protein phosphorylation;MF:ATP binding;MF:protein kinase activity;	------	------	------	------	ENOG410XPIR	T:Signal transduction mechanisms	KAF7000240.1	hypothetical protein CFC21_016176 [Triticum aestivum]	sp|F4ICB6|IBS1_ARATH;	Protein IMPAIRED IN BABA-INDUCED STERILITY 1 OS=Arabidopsis thaliana OX=3702 GN=IBS1 PE=3 SV=1;	PF00069.27;PF07714.19;PF03109.18	Pkinase;PK_Tyr_Ser-Thr;ABC1	Protein kinase domain;Protein tyrosine and serine/threonine kinase;ABC1 atypical kinase-like domain
TraesCS2A02G166300	3.31	8.67833	2.805	-	GO:000550	MF:calcium ion binding;	K02183	CALM	map04626;map04070;map04016	Plant-pathogen interaction;Phosphatidylinositol signaling system;MAPK signaling pathway - plant	ENOG410YVNY	S:Function unknown	SPT16956.1	unnamed protein product [Triticum aestivum]	------	------	PF00036.34;PF13202.8;PF13405.8;PF13499.8;PF13833.8	EF-hand_1;EF-hand_5;EF-hand_6;EF-hand_7;EF-hand_8	EF hand;EF hand;EF-hand domain;EF-hand domain pair;EF-hand domain pair
TraesCS2A02G139000	34.0458	96.7267	16.2383	-	------	------	------	------	------	------	ENOG41104Y0	S:Function unknown	KAF6999753.1	hypothetical protein CFC21_015734 [Triticum aestivum]	------	------	PF07893.15	DUF1668	Protein of unknown function
TraesCS2A02G100700	4.82083	16.0983	7.00583	-	GO:0048830;GO:0010311;GO:0005634;GO:0003700;GO:000367	BP:adventitious root development;BP:lateral root formation;CC:nucleus;MF:transcription factor activity, sequence-specific DNA binding;MF:DNA binding;	------	------	------	------	ENOG410YGSG	K:Transcription	XP_037481213.1	WUSCHEL-related homeobox 11-like [Triticum dicoccoides]	sp|A2XG77|WOX6_ORYSI;	WUSCHEL-related homeobox 6 OS=Oryza sativa subsp. indica OX=39946 GN=WOX6 PE=3 SV=1;	PF00046.31;PF12440.10	Homeodomain;MAGE_N	Homeodomain;Melanoma associated antigen family N terminal
TraesCS2A02G089900	4.90583	8.44833	5.6675	CASP-like protein [Source:UniProtKB/TrEMBL;Acc:W5B4M4]	GO:0016021;GO:0005886;GO:005153	CC:integral component of membrane;CC:plasma membrane;MF:4 iron, 4 sulfur cluster binding;	------	------	------	------	ENOG41106V6	S:Function unknown	XP_037475641.1	CASP-like protein 4B1 [Triticum dicoccoides]	sp|F2E2E4|CSPL3_HORVV;	CASP-like protein 4B1 OS=Hordeum vulgare subsp. vulgare OX=112509 PE=2 SV=1;	PF04535.14	DUF588	Domain of unknown function
TraesCS2A02G061000	3.2825	6.29333	3.445	-	GO:0016192;GO:0006886;GO:0006904;GO:0030141;GO:0005886;GO:001990	BP:vesicle-mediated transport;BP:intracellular protein transport;BP:vesicle docking involved in exocytosis;CC:secretory granule;CC:plasma membrane;MF:syntaxin binding;	K15292	STXBP1, MUNC18-1	------	------	COG5158	U:Intracellular trafficking, secretion, and vesicular transport	XP_037475450.1	probable protein transport Sec1a isoform X1 [Triticum dicoccoides]	sp|Q7XWP3|SEC1A_ORYSJ;	Probable protein transport Sec1a OS=Oryza sativa subsp. japonica OX=39947 GN=Os04g0252400 PE=3 SV=2;	PF00995.25	Sec1	Sec1 family
TraesCS1D02G427900	4.1925	5.4625	3.76083	-	GO:001602	CC:integral component of membrane;	------	------	------	------	ENOG410Z77B	S:Function unknown	KAF6997832.1	hypothetical protein CFC21_014006 [Triticum aestivum]	------	------	------	------	------
TraesCS1D02G427400	4.2725	5.71167	2.67083	Glucose-1-phosphate adenylyltransferase [Source:UniProtKB/TrEMBL;Acc:A0A341PTS8]	GO:0005978;GO:0009058;GO:0019252;GO:0009501;GO:0009507;GO:0016779;GO:0008878;GO:000552	BP:glycogen biosynthetic process;BP:biosynthetic process;BP:starch biosynthetic process;CC:amyloplast;CC:chloroplast;MF:nucleotidyltransferase activity;MF:glucose-1-phosphate adenylyltransferase activity;MF:ATP binding;	K00975	glgC	map00520;map00500	Amino sugar and nucleotide sugar metabolism;Starch and sucrose metabolism	COG0448	G:Carbohydrate transport and metabolism	KAF6997829.1	hypothetical protein CFC21_014002 [Triticum aestivum]	sp|P12299|GLGL2_WHEAT;	Glucose-1-phosphate adenylyltransferase large subunit, chloroplastic/amyloplastic OS=Triticum aestivum OX=4565 GN=AGP-L PE=2 SV=2;	PF00483.25	NTP_transferase	Nucleotidyl transferase
TraesCS1D02G402300	9.75333	20.3742	9.3175	-	GO:001602	CC:integral component of membrane;	------	------	------	------	ENOG41105Q8	S:Function unknown	XP_020196769.1	uncharacterized protein LOC109782557 [Aegilops tauschii subsp. strangulata]	------	------	------	------	------
TraesCS1D02G397400	2.86917	10.7075	5.3925	Endoglucanase [Source:UniProtKB/TrEMBL;Acc:A0A1D5SPZ2]	GO:0005975;GO:0030245;GO:0016021;GO:0005576;GO:0008810;GO:0030246;GO:000455	BP:carbohydrate metabolic process;BP:cellulose catabolic process;CC:integral component of membrane;CC:extracellular region;MF:cellulase activity;MF:carbohydrate binding;MF:hydrolase activity, hydrolyzing O-glycosyl compounds;	K01179	E3.2.1.4	map00500	Starch and sucrose metabolism	ENOG410XPC9	G:Carbohydrate transport and metabolism	XP_020157984.1	endoglucanase 15 [Aegilops tauschii subsp. strangulata]	sp|Q6L4I2|GUN15_ORYSJ;	Endoglucanase 15 OS=Oryza sativa subsp. japonica OX=39947 GN=Os05g0212300 PE=2 SV=1;	PF00759.21;PF09478.12	Glyco_hydro_9;CBM49	Glycosyl hydrolase family 9;Carbohydrate binding domain CBM49
TraesCS1D02G378000	2.975	4.04917	3.11333	-	GO:001602	CC:integral component of membrane;	------	------	------	------	ENOG41107M9	S:Function unknown	KAF6997275.1	hypothetical protein CFC21_013517 [Triticum aestivum]	------	------	------	------	------
TraesCS1D02G350900	4.37167	8.69833	4.17417	-	GO:0046658;GO:0016021;GO:000905	CC:anchored component of plasma membrane;CC:integral component of membrane;MF:electron carrier activity;	------	------	------	------	ENOG410YW92	S:Function unknown	XP_020186639.1	early nodulin-like protein 1 [Aegilops tauschii subsp. strangulata]	sp|Q9SK27|ENL1_ARATH;	Early nodulin-like protein 1 OS=Arabidopsis thaliana OX=3702 GN=At2g25060 PE=2 SV=2;	PF02298.19	Cu_bind_like	Plastocyanin-like domain
TraesCS1D02G344200	3.13	5.4775	3.13667	-	GO:0005516;GO:000551	MF:calmodulin binding;MF:protein binding;	------	------	------	------	ENOG41112Z4;ENOG41106GY	S:Function unknown;	XP_020187364.1	protein IQ-DOMAIN 14 [Aegilops tauschii subsp. strangulata]	sp|F4JMV6|IQD25_ARATH;	Protein IQ-DOMAIN 25 OS=Arabidopsis thaliana OX=3702 GN=IQD25 PE=1 SV=1;	PF00612.29;PF13178.8	IQ;DUF4005	IQ calmodulin-binding motif;Protein of unknown function
TraesCS1D02G340900	5.60833	12.7308	8.53167	-	GO:000563	CC:nucleus;	------	------	------	------	ENOG410YVV0;ENOG410YKTU	S:Function unknown;	XP_020161927.1	VQ motif-containing protein 4 [Aegilops tauschii subsp. strangulata]	sp|Q5M750|VQ4_ARATH;	VQ motif-containing protein 4 OS=Arabidopsis thaliana OX=3702 GN=VQ4 PE=1 SV=1;	PF05678.16	VQ	VQ motif
TraesCS1D02G241400	1.77167	7.7975	2.86083	-	GO:000368	MF:chromatin binding;	------	------	------	------	ENOG410ZNBY	S:Function unknown	KAF6995672.1	hypothetical protein CFC21_012126 [Triticum aestivum]	------	------	PF16719.7	SAWADEE	SAWADEE domain
TraesCS1D02G236100	3.12833	23.59	4.02167	-	GO:000552	MF:ATP binding;	------	------	------	------	------	------	KAF7015298.1	hypothetical protein CFC21_029177 [Triticum aestivum]	------	------	------	------	------
TraesCS1D02G188100	3.98	7.70917	5.07667	-	GO:0046872;GO:001649	MF:metal ion binding;MF:oxidoreductase activity;	------	------	------	------	COG3491	S:Function unknown	XP_020194998.1	2-oxoglutarate-Fe(II) type oxidoreductase hxnY [Aegilops tauschii subsp. strangulata]	sp|C8VK14|HXNY_EMENI;	2-oxoglutarate-F;	PF14226.8;PF03171.22	DIOX_N;2OG-FeII_Oxy	non-haem dioxygenase in morphine synthesis N-terminal;2OG-F
TraesCS1D02G113900	2.68917	4.43	3.47583	-	GO:0005774;GO:000377	CC:vacuolar membrane;MF:actin binding;	------	------	------	------	ENOG410YMAJ	S:Function unknown	XP_020195086.1	protein NETWORKED 4B [Aegilops tauschii subsp. strangulata]	sp|F4KEW8|NET4A_ARATH;	Protein NETWORKED 4A OS=Arabidopsis thaliana OX=3702 GN=NET4A PE=2 SV=1;	PF07765.14;PF19220.2;PF10473.11	KIP1;Crescentin;CENP-F_leu_zip	KIP1-like protein;Crescentin protein;Leucine-rich repeats of kinetochore protein Cenp-F/LEK1
TraesCS1D02G113200	3.74417	5.71333	4.29667	-	------	------	------	------	------	------	ENOG410YV28	S:Function unknown	XP_020167554.1	uncharacterized protein LOC109753037 [Aegilops tauschii subsp. strangulata]	------	------	PF05097.14	DUF688	Protein of unknown function
TraesCS1D02G090000	8.14	17.7967	6.99333	-	GO:0005986;GO:0000287;GO:005030	BP:sucrose biosynthetic process;MF:magnesium ion binding;MF:sucrose-phosphate phosphatase activity;	K07024	SPP	map00500	Starch and sucrose metabolism	COG0561	S:Function unknown	XP_037486155.1	probable sucrose-phosphatase 3 [Triticum dicoccoides]	sp|A3AZW5|SPP3_ORYSJ;	Probable sucrose-phosphatase 3 OS=Oryza sativa subsp. japonica OX=39947 GN=SPP3 PE=3 SV=1;	PF05116.15;PF08472.12;PF08282.14	S6PP;S6PP_C;Hydrolase_3	Sucrose-6F-phosphate phosphohydrolase;Sucrose-6-phosphate phosphohydrolase C-terminal;haloacid dehalogenase-like hydrolase
TraesCS1D02G078700	2.41417	11.3233	3.035	-	------	------	------	------	------	------	------	------	KAF6993600.1	hypothetical protein CFC21_010467 [Triticum aestivum]	------	------	------	------	------
TraesCS1D02G028000	8.08333	23.9942	5.65083	-	GO:0009611;GO:000486	BP:response to wounding;MF:serine-type endopeptidase inhibitor activity;	------	------	------	------	ENOG411049I	S:Function unknown	KAF6992963.1	hypothetical protein CFC21_009913 [Triticum aestivum]	sp|P16063|ICIB_HORVU;	Subtilisin-chymotrypsin inhibitor CI-1B OS=Hordeum vulgare OX=4513 PE=1 SV=1;	PF00280.20	potato_inhibit	Potato inhibitor I family
TraesCS1B02G464900	1.48333	10.6567	3.4725	-	GO:0016887;GO:000552	MF:ATPase activity;MF:ATP binding;	K08900	BCS1	------	------	COG0465	O:Posttranslational modification, protein turnover, chaperones	KAF6992392.1	hypothetical protein CFC21_009387 [Triticum aestivum]	sp|Q147F9|AATPC_ARATH;	AAA-ATPase At3g50940 OS=Arabidopsis thaliana OX=3702 GN=At3g50940 PE=2 SV=1;	PF14363.8;PF00004.31;PF05673.15;PF05496.14;PF00910.24;PF13191.8;PF13401.8	AAA_assoc;AAA;DUF815;RuvB_N;RNA_helicase;AAA_16;AAA_22	Domain associated at C-terminal with AAA;ATPase family associated with various cellular activities;Protein of unknown function;Holliday junction DNA helicase RuvB P-loop domain;RNA helicase;AAA ATPase domain;AAA domain
TraesCS1B02G439400	2.68917	4.39583	3.43583	-	GO:0006952;GO:0005524;GO:004353	BP:defense response;MF:ATP binding;MF:ADP binding;	------	------	------	------	COG4886	S:Function unknown	KAF6992114.1	hypothetical protein CFC21_009142 [Triticum aestivum]	sp|Q2R8L1|RGA5S_ORYSJ;	Disease resistance protein RGA5 OS=Oryza sativa subsp. japonica OX=39947 GN=RGA5 PE=2 SV=1;	PF00931.24;PF18052.3;PF13855.8;PF12799.9	NB-ARC;Rx_N;LRR_8;LRR_4	NB-ARC domain;Rx N-terminal domain;Leucine rich repeat;Leucine Rich repeats
TraesCS1B02G362600	6.51083	13.1225	7.23333	-	GO:0046658;GO:000905	CC:anchored component of plasma membrane;MF:electron carrier activity;	------	------	------	------	ENOG410YW92	S:Function unknown	XP_037441825.1	early nodulin-like protein 1 [Triticum dicoccoides]	sp|Q9SK27|ENL1_ARATH;	Early nodulin-like protein 1 OS=Arabidopsis thaliana OX=3702 GN=At2g25060 PE=2 SV=2;	PF02298.19	Cu_bind_like	Plastocyanin-like domain
TraesCS1B02G347000	3.45083	6.9725	4.495	-	GO:0008360;GO:0007015;GO:0030865;GO:0007163;GO:0007264;GO:0032956;GO:0005737;GO:0005856;GO:0042995;GO:0043231;GO:0031410;GO:0005634;GO:0016020;GO:0005622;GO:0005938;GO:0005886;GO:0003924;GO:0019901;GO:000552	BP:regulation of cell shape;BP:actin filament organization;BP:cortical cytoskeleton organization;BP:establishment or maintenance of cell polarity;BP:small GTPase mediated signal transduction;BP:regulation of actin cytoskeleton organization;CC:cytoplasm;CC:cytoskeleton;CC:cell projection;CC:intracellular membrane-bounded organelle;CC:cytoplasmic vesicle;CC:nucleus;CC:membrane;CC:intracellular;CC:c…	K04392	RAC1	map04145	Phagosome	COG1100	S:Function unknown	XP_020169314.1	rac-like GTP-binding protein 2 [Aegilops tauschii subsp. strangulata]	sp|Q68Y52|RAC2_ORYSJ;	Rac-like GTP-binding protein 2 OS=Oryza sativa subsp. japonica OX=39947 GN=RAC2 PE=2 SV=1;	PF00071.24;PF08477.15;PF00025.23	Ras;Roc;Arf	Ras family;Ras of Complex, Roc, domain of DAPkinase;ADP-ribosylation factor family
TraesCS1B02G316000	4.99583	8.20583	5.08833	-	GO:001602	CC:integral component of membrane;	------	------	------	------	ENOG411053F	S:Function unknown	XP_037472614.1	uncharacterized protein LOC119348733 [Triticum dicoccoides]	------	------	------	------	------
TraesCS1B02G293300	3.20583	4.03917	2.91583	-	------	------	K09422	MYBP	------	------	COG5147	K:Transcription	KAF6990474.1	hypothetical protein CFC21_007662 [Triticum aestivum]	sp|Q0JHU7|MB3R2_ORYSJ;	Transcription factor MYB3R-2 OS=Oryza sativa subsp. japonica OX=39947 GN=MYB3R-2 PE=2 SV=1;	PF00249.33;PF13921.8;PF15963.7	Myb_DNA-binding;Myb_DNA-bind_6;Myb_DNA-bind_7	Myb-like DNA-binding domain;Myb-like DNA-binding domain;Myb DNA-binding like
TraesCS1B02G291900	2.92833	5.825	3.4575	-	GO:0005739;GO:000551	CC:mitochondrion;MF:protein binding;	------	------	------	------	ENOG4111R0V	S:Function unknown	XP_037471983.1	uncharacterized protein LOC119347151 [Triticum dicoccoides]	------	------	PF13424.8;PF17874.3;PF13374.8;PF07719.19;PF13428.8;PF00515.30	TPR_12;TPR_MalT;TPR_10;TPR_2;TPR_14;TPR_1	Tetratricopeptide repeat;MalT-like TPR region;Tetratricopeptide repeat;Tetratricopeptide repeat;Tetratricopeptide repeat;Tetratricopeptide repeat
TraesCS1B02G253200	3.11083	5.46167	3.4225	-	GO:0045893;GO:0005634;GO:000367	BP:positive regulation of transcription, DNA-templated;CC:nucleus;MF:DNA binding;	------	------	------	------	ENOG411073F;ENOG4111TEK	S:Function unknown;	KAF6990002.1	hypothetical protein CFC21_007262 [Triticum aestivum]	sp|Q9FXH7|SRS7_ARATH;	Protein SHI RELATED SEQUENCE 7 OS=Arabidopsis thaliana OX=3702 GN=SRS7 PE=1 SV=1;	PF05142.14	DUF702	Domain of unknown function
TraesCS1B02G220500	6.39333	9.49417	5.49417	-	GO:0007049;GO:0005634;GO:000486	BP:cell cycle;CC:nucleus;MF:protein kinase inhibitor activity;	------	------	------	------	ENOG411080E	D:Cell cycle control, cell division, chromosome partitioning	XP_037466705.1	cyclin-dependent protein kinase inhibitor SMR1-like [Triticum dicoccoides]	sp|Q9AV28|SMR1_ORYSJ;	Cyclin-dependent protein kinase inhibitor SMR1 OS=Oryza sativa subsp. japonica OX=39947 GN=SMR1 PE=2 SV=1;	------	------	------
TraesCS1B02G216300	2.32417	4.32	3.295	MLO-like protein [Source:UniProtKB/TrEMBL;Acc:A0A1D5S971]	GO:0009607;GO:0006952;GO:0016021;GO:0016020;GO:0110165;GO:000551	BP:response to biotic stimulus;BP:defense response;CC:integral component of membrane;CC:membrane;CC:cellular anatomical entity;MF:calmodulin binding;	K08472	MLO	------	------	ENOG410YDNX	D:Cell cycle control, cell division, chromosome partitioning	KAF6989542.1	hypothetical protein CFC21_006870 [Triticum aestivum]	sp|Q94KB4|MLO9_ARATH;	MLO-like protein 9 OS=Arabidopsis thaliana OX=3702 GN=MLO9 PE=2 SV=2;	PF03094.17	Mlo	Mlo family
TraesCS1B02G211400	3.015	5.61417	3.62167	Hyperosmolality-gated Ca2+ permeable channel 1.4 [Source:UniProtKB/TrEMBL;Acc:W5A3G2]	GO:0006811;GO:0034220;GO:0098655;GO:0005794;GO:0016020;GO:0005886;GO:0016021;GO:0009506;GO:0005227;GO:000838	BP:ion transport;BP:ion transmembrane transport;BP:cation transmembrane transport;CC:Golgi apparatus;CC:membrane;CC:plasma membrane;CC:integral component of membrane;CC:plasmodesma;MF:calcium activated cation channel activity;MF:mechanically-gated ion channel activity;	K21989	TMEM63, CSC1	------	------	COG5594	S:Function unknown	AKG97233.1	hyperosmolality-gated Ca2+ permeable channel [Triticum aestivum]	sp|Q9FVQ5|CSCL1_ARATH;	CSC1-like protein At1g32090 OS=Arabidopsis thaliana OX=3702 GN=At1g32090 PE=1 SV=1;	PF02714.17;PF14703.8;PF13967.8	RSN1_7TM;PHM7_cyt;RSN1_TM	Calcium-dependent channel, 7TM region, putative phosphate;Cytosolic domain of 10TM putative phosphate transporter;Late exocytosis, associated with Golgi transport
TraesCS1B02G131700	11.3925	17.0192	9.45583	-	------	------	------	------	------	------	ENOG410YSF4;ENOG411048F	S:Function unknown;	XP_037436678.1	uncharacterized protein LOC119303655 [Triticum dicoccoides]	------	------	PF14009.8	PADRE	PADRE domain
TraesCS1B02G130200	4.76667	10.5808	6.78333	-	GO:0003723;GO:0003676;GO:000827	MF:RNA binding;MF:nucleic acid binding;MF:zinc ion binding;	K12896	SRSF7, SFRS7	map03040	Spliceosome	ENOG4111N8Y	S:Function unknown	VAH14926.1	unnamed protein product [Triticum turgidum subsp. durum]	sp|Q9FYB7|RSZ32_ARATH;	Serine/arginine-rich splicing factor RS2Z32 OS=Arabidopsis thaliana OX=3702 GN=RS2Z32 PE=1 SV=1;	PF00076.24;PF00098.25	RRM_1;zf-CCHC	RNA recognition motif.;Zinc knuckle
TraesCS1B02G127900	2.61917	5.60833	2.595	-	GO:0019538;GO:0006508;GO:0005737;GO:0004177;GO:0030145;GO:0070006;GO:000823	BP:protein metabolic process;BP:proteolysis;CC:cytoplasm;MF:aminopeptidase activity;MF:manganese ion binding;MF:metalloaminopeptidase activity;MF:metalloexopeptidase activity;	K01255	CARP, pepA	map00480	Glutathione metabolism	COG0260	E:Amino acid transport and metabolism	KAF6988418.1	hypothetical protein CFC21_005954 [Triticum aestivum]	sp|Q6K669|AMPL2_ORYSJ;	Leucine aminopeptidase 2, chloroplastic OS=Oryza sativa subsp. japonica OX=39947 GN=Os02g0794700 PE=2 SV=1;	PF00883.23;PF02789.19	Peptidase_M17;Peptidase_M17_N	Cytosol aminopeptidase family, catalytic domain;Cytosol aminopeptidase family, N-terminal domain
TraesCS1B02G120000	5.49917	12.5667	5.045	-	------	------	------	------	------	------	ENOG410YBG3	S:Function unknown	KAF6988294.1	hypothetical protein CFC21_005857 [Triticum aestivum]	sp|P50699|TLPH_ARATH;	Thaumatin-like protein OS=Arabidopsis thaliana OX=3702 GN=At1g18250 PE=2 SV=2;	PF00314.19	Thaumatin	Thaumatin family
TraesCS1B02G115600	8.89083	22.99	11.655	-	GO:0009738;GO:0006952;GO:0080163;GO:0009607;GO:0005737;GO:0005634;GO:0038023;GO:0004864;GO:001042	BP:abscisic acid-activated signaling pathway;BP:defense response;BP:regulation of protein serine/threonine phosphatase activity;BP:response to biotic stimulus;CC:cytoplasm;CC:nucleus;MF:signaling receptor activity;MF:protein phosphatase inhibitor activity;MF:abscisic acid binding;	------	------	------	------	ENOG410YZ38	S:Function unknown	KAF6988246.1	hypothetical protein CFC21_005814 [Triticum aestivum]	sp|Q05736|PR1_ASPOF;	Pathogenesis-related protein 1 OS=Asparagus officinalis OX=4686 GN=PR1 PE=2 SV=1;	PF00407.21	Bet_v_1	Pathogenesis-related protein Bet v 1 family
TraesCS1B02G107600	3.15583	6.32417	2.95833	-	GO:0005986;GO:0000287;GO:005030	BP:sucrose biosynthetic process;MF:magnesium ion binding;MF:sucrose-phosphate phosphatase activity;	K07024	SPP	map00500	Starch and sucrose metabolism	COG0561	S:Function unknown	KAF6988152.1	hypothetical protein CFC21_005725 [Triticum aestivum]	sp|A3AZW5|SPP3_ORYSJ;	Probable sucrose-phosphatase 3 OS=Oryza sativa subsp. japonica OX=39947 GN=SPP3 PE=3 SV=1;	PF05116.15;PF08472.12;PF08282.14	S6PP;S6PP_C;Hydrolase_3	Sucrose-6F-phosphate phosphohydrolase;Sucrose-6-phosphate phosphohydrolase C-terminal;haloacid dehalogenase-like hydrolase
TraesCS1B02G102000	2.83167	21.9192	5.5975	-	------	------	------	------	------	------	ENOG411069Q	S:Function unknown	KAF6988088.1	hypothetical protein CFC21_005668 [Triticum aestivum]	------	------	------	------	------
TraesCS1B02G077000	4.08	6.1325	4.0725	-	GO:0005794;GO:0016021;GO:001529	CC:Golgi apparatus;CC:integral component of membrane;MF:antiporter activity;	------	------	------	------	ENOG410XP1S	S:Function unknown	XP_037450982.1	probable sugar phosphate/phosphate translocator At3g11320 [Triticum dicoccoides]	sp|Q6DBP3|PT505_ARATH;	Probable sugar phosphate/phosphate translocator At5g05820 OS=Arabidopsis thaliana OX=3702 GN=At5g05820 PE=2 SV=1;	PF03151.18;PF08449.13;PF00892.22	TPT;UAA;EamA	Triose-phosphate Transporter family;UAA transporter family;EamA-like transporter family
TraesCS1B02G068300	3.65833	5.95833	4.26083	-	------	------	------	------	------	------	ENOG41105YD	S:Function unknown	KAF6987690.1	hypothetical protein CFC21_005312 [Triticum aestivum]	------	------	------	------	------
TraesCS1B02G024300	5.68417	7.41667	5.41833	-	GO:0005634;GO:004687	CC:nucleus;MF:metal ion binding;	------	------	------	------	COG5184;COG5184	D:Cell cycle control, cell division, chromosome partitioning;Z:Cytoskeleton	KAF6987190.1	hypothetical protein CFC21_004854 [Triticum aestivum]	sp|Q947D2|PRAF1_ARATH;	PH, RCC1 and FYVE domains-containing protein 1 OS=Arabidopsis thaliana OX=3702 GN=PRAF1 PE=1 SV=1;	PF08381.13	BRX	Transcription factor regulating root and shoot growth via Pin3
TraesCS1A02G420600	3.27667	5.6225	3.2425	-	------	------	------	------	------	------	ENOG4111BI0	S:Function unknown	XP_037427991.1	PLASMODESMATA CALLOSE-BINDING PROTEIN 2-like isoform X1 [Triticum dicoccoides]	sp|Q9SD84|PDCB2_ARATH;	PLASMODESMATA CALLOSE-BINDING PROTEIN 2 OS=Arabidopsis thaliana OX=3702 GN=PDCB2 PE=1 SV=1;	PF07983.15	X8	X8 domain
TraesCS1A02G419600	3.37917	4.5625	2.27583	Glucose-1-phosphate adenylyltransferase [Source:UniProtKB/TrEMBL;Acc:A0A341P4Q8]	GO:0005978;GO:0009058;GO:0019252;GO:0009501;GO:0009507;GO:0016779;GO:0008878;GO:000552	BP:glycogen biosynthetic process;BP:biosynthetic process;BP:starch biosynthetic process;CC:amyloplast;CC:chloroplast;MF:nucleotidyltransferase activity;MF:glucose-1-phosphate adenylyltransferase activity;MF:ATP binding;	K00975	glgC	map00520;map00500	Amino sugar and nucleotide sugar metabolism;Starch and sucrose metabolism	COG0448	G:Carbohydrate transport and metabolism	KAF6986588.1	hypothetical protein CFC21_004322 [Triticum aestivum]	sp|P12299|GLGL2_WHEAT;	Glucose-1-phosphate adenylyltransferase large subunit, chloroplastic/amyloplastic OS=Triticum aestivum OX=4565 GN=AGP-L PE=2 SV=2;	PF00483.25	NTP_transferase	Nucleotidyl transferase
TraesCS1A02G416200	4.46167	8.68833	5.37583	-	GO:0006468;GO:0005886;GO:0004674;GO:0005524;GO:000467	BP:protein phosphorylation;CC:plasma membrane;MF:protein serine/threonine kinase activity;MF:ATP binding;MF:protein kinase activity;	------	------	------	------	COG0515	T:Signal transduction mechanisms	KAF6986547.1	hypothetical protein CFC21_004285 [Triticum aestivum]	sp|Q9ZQ31|STY13_ARATH;	Serine/threonine-protein kinase STY13 OS=Arabidopsis thaliana OX=3702 GN=STY13 PE=1 SV=2;	PF07714.19;PF00069.27;PF17667.3;PF14531.8	PK_Tyr_Ser-Thr;Pkinase;Pkinase_fungal;Kinase-like	Protein tyrosine and serine/threonine kinase;Protein kinase domain;Fungal protein kinase;Kinase-like
TraesCS1A02G389300	2.58917	9.26083	4.21333	Endoglucanase [Source:UniProtKB/TrEMBL;Acc:A0A1D6RDC6]	GO:0005975;GO:0030245;GO:0016021;GO:0005576;GO:0008810;GO:0030246;GO:000455	BP:carbohydrate metabolic process;BP:cellulose catabolic process;CC:integral component of membrane;CC:extracellular region;MF:cellulase activity;MF:carbohydrate binding;MF:hydrolase activity, hydrolyzing O-glycosyl compounds;	K01179	E3.2.1.4	map00500	Starch and sucrose metabolism	ENOG410XPC9	G:Carbohydrate transport and metabolism	KAF6986229.1	hypothetical protein CFC21_004015 [Triticum aestivum]	sp|Q6L4I2|GUN15_ORYSJ;	Endoglucanase 15 OS=Oryza sativa subsp. japonica OX=39947 GN=Os05g0212300 PE=2 SV=1;	PF00759.21;PF09478.12	Glyco_hydro_9;CBM49	Glycosyl hydrolase family 9;Carbohydrate binding domain CBM49
TraesCS1A02G380900	3.36	5.17417	4.06583	Protein DETOXIFICATION [Source:UniProtKB/TrEMBL;Acc:A0A1D5RWF9]	GO:0055085;GO:0016021;GO:0016020;GO:0015297;GO:0015238;GO:0022857;GO:004291	BP:transmembrane transport;CC:integral component of membrane;CC:membrane;MF:antiporter activity;MF:drug transmembrane transporter activity;MF:transmembrane transporter activity;MF:xenobiotic transporter activity;	K03327	TC.MATE, SLC47A, norM, mdtK, dinF	------	------	COG0534	V:Defense mechanisms	KAF6986117.1	hypothetical protein CFC21_003902 [Triticum aestivum]	sp|Q9C994|DTX14_ARATH;	Protein DETOXIFICATION 14 OS=Arabidopsis thaliana OX=3702 GN=DTX14 PE=1 SV=1;	PF01554.20	MatE	MatE
TraesCS1A02G373200	4.80667	6.71917	3.67	-	GO:001687	MF:ligase activity;	------	------	------	------	ENOG41121N2	O:Posttranslational modification, protein turnover, chaperones	KAF6986029.1	hypothetical protein CFC21_003823 [Triticum aestivum]	sp|Q7XTV7|HIP1_ORYSJ;	Probable E3 ubiquitin-protein ligase HIP1 OS=Oryza sativa subsp. japonica OX=39947 GN=HIP1 PE=1 SV=2;	PF13639.8;PF12678.9;PF13923.8;PF17123.7;PF00097.27;PF14634.8;PF13920.8;PF13445.8;PF12861.9	zf-RING_2;zf-rbx1;zf-C3HC4_2;zf-RING_11;zf-C3HC4;zf-RING_5;zf-C3HC4_3;zf-RING_UBOX;zf-ANAPC11	Ring finger domain;RING-H2 zinc finger domain;Zinc finger, C3HC4 type;RING-like zinc finger;Zinc finger, C3HC4 type;zinc-RING finger domain;Zinc finger, C3HC4 type;RING-type zinc-finger;Anaphase-promoting complex subunit 11 RING-H2 finger
TraesCS1A02G348000	5.07167	7.59833	4.355	-	GO:0046658;GO:000905	CC:anchored component of plasma membrane;MF:electron carrier activity;	------	------	------	------	ENOG410YW92	S:Function unknown	XP_037453639.1	early nodulin-like protein 1 [Triticum dicoccoides]	sp|Q9SK27|ENL1_ARATH;	Early nodulin-like protein 1 OS=Arabidopsis thaliana OX=3702 GN=At2g25060 PE=2 SV=2;	PF02298.19	Cu_bind_like	Plastocyanin-like domain
TraesCS1A02G342900	11.6408	22.2975	13.0033	-	GO:0055085;GO:0016021;GO:0140359;GO:0005524;GO:004262	BP:transmembrane transport;CC:integral component of membrane;MF:ABC-type transmembrane transporter activity;MF:ATP binding;MF:ATPase activity, coupled to transmembrane movement of substances;	------	------	------	------	ENOG410XXUP	S:Function unknown	KAF6985682.1	hypothetical protein CFC21_003512 [Triticum aestivum]	sp|Q84K47|AB2A_ARATH;	ABC transporter A family member 2 OS=Arabidopsis thaliana OX=3702 GN=ABCA2 PE=2 SV=1;	PF00005.29;PF12698.9;PF13304.8;PF13476.8	ABC_tran;ABC2_membrane_3;AAA_21;AAA_23	ABC transporter;ABC-2 family transporter protein;AAA domain, putative AbiEii toxin, Type IV TA system;AAA domain
TraesCS1A02G333600	5.61333	13.3342	7.0925	-	GO:0008360;GO:0007015;GO:0030865;GO:0007163;GO:0007264;GO:0032956;GO:0005737;GO:0005856;GO:0042995;GO:0043231;GO:0031410;GO:0005634;GO:0016020;GO:0005622;GO:0005938;GO:0005886;GO:0003924;GO:0019901;GO:000552	BP:regulation of cell shape;BP:actin filament organization;BP:cortical cytoskeleton organization;BP:establishment or maintenance of cell polarity;BP:small GTPase mediated signal transduction;BP:regulation of actin cytoskeleton organization;CC:cytoplasm;CC:cytoskeleton;CC:cell projection;CC:intracellular membrane-bounded organelle;CC:cytoplasmic vesicle;CC:nucleus;CC:membrane;CC:intracellular;CC:c…	K04392	RAC1	map04145	Phagosome	COG1100	S:Function unknown	XP_020169314.1	rac-like GTP-binding protein 2 [Aegilops tauschii subsp. strangulata]	sp|Q68Y52|RAC2_ORYSJ;	Rac-like GTP-binding protein 2 OS=Oryza sativa subsp. japonica OX=39947 GN=RAC2 PE=2 SV=1;	PF00071.24;PF08477.15;PF00025.23	Ras;Roc;Arf	Ras family;Ras of Complex, Roc, domain of DAPkinase;ADP-ribosylation factor family
TraesCS1A02G295900	4.78333	7.33833	5.61583	-	GO:0006511;GO:0016021;GO:006163	BP:ubiquitin-dependent protein catabolic process;CC:integral component of membrane;MF:ubiquitin protein ligase activity;	------	------	------	------	ENOG41121N2	O:Posttranslational modification, protein turnover, chaperones	KAF6985148.1	hypothetical protein CFC21_003043 [Triticum aestivum]	sp|Q67YI6|ATL65_ARATH;	RING-H2 finger protein ATL65 OS=Arabidopsis thaliana OX=3702 GN=ATL65 PE=2 SV=2;	PF13639.8;PF17123.7;PF12678.9;PF13923.8;PF00097.27;PF13920.8;PF14447.8;PF13445.8;PF14634.8;PF12861.9	zf-RING_2;zf-RING_11;zf-rbx1;zf-C3HC4_2;zf-C3HC4;zf-C3HC4_3;Prok-RING_4;zf-RING_UBOX;zf-RING_5;zf-ANAPC11	Ring finger domain;RING-like zinc finger;RING-H2 zinc finger domain;Zinc finger, C3HC4 type;Zinc finger, C3HC4 type;Zinc finger, C3HC4 type;Prokaryotic RING finger family 4;RING-type zinc-finger;zinc-RING finger domain;Anaphase-promoting complex subunit 11 RING-H2 finger
TraesCS1A02G279300	3.32417	5.29583	3.31583	-	GO:0006811;GO:0055085;GO:0031969;GO:0009536;GO:0016021;GO:0005315;GO:002285	BP:ion transport;BP:transmembrane transport;CC:chloroplast membrane;CC:plastid;CC:integral component of membrane;MF:inorganic phosphate transmembrane transporter activity;MF:transmembrane transporter activity;	K08193	SLC17A	------	------	ENOG410XPWC	G:Carbohydrate transport and metabolism	KAF6984957.1	hypothetical protein CFC21_002889 [Triticum aestivum]	sp|Q53WP9|PHT42_ORYSJ;	Probable anion transporter 2, chloroplastic OS=Oryza sativa subsp. japonica OX=39947 GN=PHT4;2 PE=2 SV=1;	PF07690.18;PF00083.26	MFS_1;Sugar_tr	Major Facilitator Superfamily;Sugar
TraesCS1A02G278600	2.53333	5.10667	3.0325	-	GO:0006396;GO:000551	BP:RNA processing;MF:protein binding;	------	------	------	------	ENOG4111RQ5	S:Function unknown	VAH07938.1	unnamed protein product [Triticum turgidum subsp. durum]	------	------	PF14559.8;PF13432.8;PF13428.8	TPR_19;TPR_16;TPR_14	Tetratricopeptide repeat;Tetratricopeptide repeat;Tetratricopeptide repeat
TraesCS1A02G264900	2.51	3.91833	3.03	-	GO:0031146;GO:0019005;GO:000551	BP:SCF-dependent proteasomal ubiquitin-dependent protein catabolic process;CC:SCF ubiquitin ligase complex;MF:protein binding;	K03875	SKP2, FBXL1	map04120	Ubiquitin mediated proteolysis	ENOG41103D0	O:Posttranslational modification, protein turnover, chaperones	KAF6984796.1	hypothetical protein CFC21_002749 [Triticum aestivum]	sp|Q9LPL4|SKP2A_ARATH;	F-box protein SKP2A OS=Arabidopsis thaliana OX=3702 GN=SKP2A PE=1 SV=1;	PF13516.8;PF12799.9	LRR_6;LRR_4	Leucine Rich repeat;Leucine Rich repeats
TraesCS1A02G263000	2.945	4.115	2.58833	-	------	------	------	------	------	------	COG1678	K:Transcription	KAF6984776.1	hypothetical protein CFC21_002732 [Triticum aestivum]	sp|Q11U74|Y1773_CYTH3;	UPF0301 protein CHU_1773 OS=Cytophaga hutchinsonii;	PF02622.17	DUF179	Uncharacterized ACR, COG1678
TraesCS1A02G241500	2.57917	5.91583	2.6875	-	GO:000368	MF:chromatin binding;	------	------	------	------	ENOG410ZNBY	S:Function unknown	KAF6984512.1	hypothetical protein CFC21_002507 [Triticum aestivum]	------	------	PF16719.7	SAWADEE	SAWADEE domain
TraesCS1A02G241400	3.08333	5.57583	3.08167	-	GO:0045893;GO:0005634;GO:000367	BP:positive regulation of transcription, DNA-templated;CC:nucleus;MF:DNA binding;	------	------	------	------	ENOG411073F;ENOG4111TEK	S:Function unknown;	KAF6984511.1	hypothetical protein CFC21_002506 [Triticum aestivum]	sp|Q94CK9|LRP1_ARATH;	Protein LATERAL ROOT PRIMORDIUM 1 OS=Arabidopsis thaliana OX=3702 GN=LRP1 PE=1 SV=1;	PF05142.14	DUF702	Domain of unknown function
TraesCS1A02G240300	3.765	7.0125	4.06083	-	GO:0006468;GO:0010069;GO:0046777;GO:0009570;GO:0016021;GO:0005886;GO:0090406;GO:0009505;GO:0004674;GO:0005515;GO:0004672;GO:000552	BP:protein phosphorylation;BP:zygote asymmetric cytokinesis in embryo sac;BP:protein autophosphorylation;CC:chloroplast stroma;CC:integral component of membrane;CC:plasma membrane;CC:pollen tube;CC:plant-type cell wall;MF:protein serine/threonine kinase activity;MF:protein binding;MF:protein kinase activity;MF:ATP binding;	------	------	------	------	COG0515	T:Signal transduction mechanisms	KAF6983431.1	hypothetical protein CFC21_001619 [Triticum aestivum]	sp|Q9ZU46|ZAR1_ARATH;	Receptor protein kinase-like protein ZAR1 OS=Arabidopsis thaliana OX=3702 GN=ZAR1 PE=1 SV=1;	PF00069.27;PF07714.19;PF13855.8;PF08263.14;PF12799.9	Pkinase;PK_Tyr_Ser-Thr;LRR_8;LRRNT_2;LRR_4	Protein kinase domain;Protein tyrosine and serine/threonine kinase;Leucine rich repeat;Leucine rich repeat N-terminal domain;Leucine Rich repeats
TraesCS1A02G237800	3.32417	4.99833	3.24667	-	GO:001602	CC:integral component of membrane;	------	------	------	------	ENOG411180W	S:Function unknown	XP_037414588.1	uncharacterized protein LOC119277412 [Triticum dicoccoides]	------	------	------	------	------
TraesCS1A02G213900	3.15083	11.6533	5.61917	-	GO:0000266;GO:0050832;GO:0046686;GO:0005737;GO:0016020;GO:0005739;GO:0005774;GO:0005886;GO:0009506;GO:0008017;GO:0003924;GO:000552	BP:mitochondrial fission;BP:defense response to fungus;BP:response to cadmium ion;CC:cytoplasm;CC:membrane;CC:mitochondrion;CC:vacuolar membrane;CC:plasma membrane;CC:plasmodesma;MF:microtubule binding;MF:GTPase activity;MF:GTP binding;	------	------	------	------	COG0699	S:Function unknown	XP_037412060.1	dynamin-related protein 1E-like [Triticum dicoccoides]	sp|Q9FNX5|DRP1E_ARATH;	Phragmoplastin DRP1E OS=Arabidopsis thaliana OX=3702 GN=DRP1E PE=1 SV=1;	PF01031.22;PF00350.25;PF02212.20;PF01926.25	Dynamin_M;Dynamin_N;GED;MMR_HSR1	Dynamin central region;Dynamin family;Dynamin GTPase effector domain;50S ribosome-binding GTPase
TraesCS1A02G206200	2.82083	4.615	3.36833	Cytochrome c-type biogenesis protein CcmE homolog, mitochondrial [Source:Projected from Arabidopsis thaliana (AT3G51790) UniProtKB/Swiss-Prot;Acc:Q96326]	GO:0017003;GO:0017004;GO:0016021;GO:0005743;GO:0005886;GO:002003	BP:protein-heme linkage;BP:cytochrome complex assembly;CC:integral component of membrane;CC:mitochondrial inner membrane;CC:plasma membrane;MF:heme binding;	------	------	------	------	COG2332	O:Posttranslational modification, protein turnover, chaperones	KAF6984081.1	hypothetical protein CFC21_002139 [Triticum aestivum]	sp|Q96326|CCME_ARATH;	Cytochrome c-type biogenesis protein CcmE homolog, mitochondrial OS=Arabidopsis thaliana OX=3702 GN=CCME PE=1 SV=1;	PF03100.17	CcmE	CcmE
TraesCS1A02G189300	4.09917	10.7333	5.05917	-	------	------	------	------	------	------	ENOG4111QDI	S:Function unknown	KAF6983873.1	hypothetical protein CFC21_001968 [Triticum aestivum]	------	------	PF00561.22;PF12697.9;PF12146.10	Abhydrolase_1;Abhydrolase_6;Hydrolase_4	alpha/beta hydrolase fold;Alpha/beta hydrolase family;Serine aminopeptidase, S33
TraesCS1A02G189200	3.9325	5.64417	3.55333	-	GO:001602	CC:integral component of membrane;	------	------	------	------	ENOG4111QDI	S:Function unknown	VAH05522.1	unnamed protein product [Triticum turgidum subsp. durum]	------	------	PF12697.9;PF12146.10;PF00561.22	Abhydrolase_6;Hydrolase_4;Abhydrolase_1	Alpha/beta hydrolase family;Serine aminopeptidase, S33;alpha/beta hydrolase fold
TraesCS1A02G171300	4.67917	7.77	3.69417	-	GO:0006355;GO:0005634;GO:000367	BP:regulation of transcription, DNA-templated;CC:nucleus;MF:DNA binding;	------	------	------	------	ENOG41105PA	S:Function unknown	KAF6983658.1	hypothetical protein CFC21_001797 [Triticum aestivum]	sp|Q9M161|DOF41_ARATH;	Dof zinc finger protein DOF4.1 OS=Arabidopsis thaliana OX=3702 GN=DOF4.1 PE=2 SV=2;	PF02701.17	zf-Dof	Dof domain, zinc finger
TraesCS1A02G127800	2.54083	7.53167	3.32083	-	GO:0016021;GO:000827	CC:integral component of membrane;MF:zinc ion binding;	------	------	------	------	ENOG41104QM	S:Function unknown	KAF6983079.1	hypothetical protein CFC21_001366 [Triticum aestivum]	------	------	PF06839.14	zf-GRF	GRF zinc finger
TraesCS1A02G111500	13.2492	20.6208	12.2083	-	------	------	------	------	------	------	ENOG410YSF4;ENOG411048F	S:Function unknown;	KAF6982887.1	hypothetical protein CFC21_001213 [Triticum aestivum]	------	------	PF14009.8	PADRE	PADRE domain
TraesCS1A02G111100	3.72167	4.79583	3.67833	-	GO:0006418;GO:0006422;GO:0005737;GO:0004812;GO:0004815;GO:0000166;GO:0003676;GO:000552	BP:tRNA aminoacylation for protein translation;BP:aspartyl-tRNA aminoacylation;CC:cytoplasm;MF:aminoacyl-tRNA ligase activity;MF:aspartate-tRNA ligase activity;MF:nucleotide binding;MF:nucleic acid binding;MF:ATP binding;	K22503	DARS1	map00970	Aminoacyl-tRNA biosynthesis	COG0017	J:Translation, ribosomal structure and biogenesis	KAF6982881.1	hypothetical protein CFC21_001209 [Triticum aestivum]	sp|Q8H104|SYDC1_ARATH;	Aspartate--tRNA ligase 1, cytoplasmic OS=Arabidopsis thaliana OX=3702 GN=At4g26870 PE=2 SV=1;	PF00152.22	tRNA-synt_2	tRNA synthetases class II
TraesCS1A02G088600	3.20833	8.65083	3.65333	-	GO:0005986;GO:0000287;GO:005030	BP:sucrose biosynthetic process;MF:magnesium ion binding;MF:sucrose-phosphate phosphatase activity;	K07024	SPP	map00500	Starch and sucrose metabolism	COG0561	S:Function unknown	XP_037486155.1	probable sucrose-phosphatase 3 [Triticum dicoccoides]	sp|A3AZW5|SPP3_ORYSJ;	Probable sucrose-phosphatase 3 OS=Oryza sativa subsp. japonica OX=39947 GN=SPP3 PE=3 SV=1;	PF05116.15;PF08472.12;PF08282.14	S6PP;S6PP_C;Hydrolase_3	Sucrose-6F-phosphate phosphohydrolase;Sucrose-6-phosphate phosphohydrolase C-terminal;haloacid dehalogenase-like hydrolase
TraesCS1A02G080600	3.89833	7.99333	4.0625	Non-specific serine/threonine protein kinase [Source:UniProtKB/TrEMBL;Acc:A0A0D3R0L8]	GO:0006468;GO:0016310;GO:0106311;GO:0007165;GO:0016301;GO:0000166;GO:0004674;GO:0016740;GO:0004672;GO:0005524;GO:010631	BP:protein phosphorylation;BP:phosphorylation;BP:old GO;BP:signal transduction;MF:kinase activity;MF:nucleotide binding;MF:protein serine/threonine kinase activity;MF:transferase activity;MF:protein kinase activity;MF:ATP binding;MF:old GO;	K07198	PRKAA, AMPK	------	------	COG0515	T:Signal transduction mechanisms	AJR22378.1	CBL-interacting protein kinase 17 [Triticum aestivum]	sp|Q75L42|CIPKH_ORYSJ;	CBL-interacting protein kinase 17 OS=Oryza sativa subsp. japonica OX=39947 GN=CIPK17 PE=2 SV=1;	PF00069.27;PF07714.19;PF03822.16;PF14531.8;PF03109.18;PF02149.21	Pkinase;PK_Tyr_Ser-Thr;NAF;Kinase-like;ABC1;KA1	Protein kinase domain;Protein tyrosine and serine/threonine kinase;NAF domain;Kinase-like;ABC1 atypical kinase-like domain;Kinase associated domain 1
ENSRNA050022781	4.01667	6.13	5.72667	Small nucleolar RNA Z43	------	------	------	------	------	------	------	------	------	------	------	------	------	------	------

## Sheet: TableS3-3 MElightcyan
Gene_id	CK	Al	Mn	Gene_description	GO_id	GO_term	KO_id	KO_name	Pathway_id	Pathway_definition	COG_id	COG_Functional Categories	NR_hit-name	NR_description	Swiss-Prot_hit-name	Swiss-Prot_description	Pfam_id	Domain	Domain description
TraesCSU02G118100	8.99167	13.9367	4.87833	-	GO:000550	MF:calcium ion binding;	K24345	KIC	------	------	COG5126;COG5126;COG5126	D:Cell cycle control, cell division, chromosome partitioning;T:Signal transduction mechanisms;Z:Cytoskeleton	XP_020166842.2	uncharacterized protein LOC109752357 [Aegilops tauschii subsp. strangulata]	sp|Q9ZPX9|KIC_ARATH;	Calcium-binding protein KIC OS=Arabidopsis thaliana OX=3702 GN=KIC PE=1 SV=2;	PF13833.8;PF00036.34	EF-hand_8;EF-hand_1	EF-hand domain pair;EF hand
TraesCSU02G017100	9.94333	18.7592	7.47083	-	GO:001602	CC:integral component of membrane;	------	------	------	------	ENOG410YUS6;ENOG410Z7Z7	S:Function unknown;	XP_020199819.1	uncharacterized protein LOC109785634 [Aegilops tauschii subsp. strangulata]	------	------	------	------	------
TraesCS7D02G472700	4.28	7.685	2.545	-	------	------	------	------	------	------	COG0071	O:Posttranslational modification, protein turnover, chaperones	XP_020162265.2	neurofilament heavy polypeptide-like [Aegilops tauschii subsp. strangulata]	------	------	PF00011.23	HSP20	Hsp20/alpha crystallin family
TraesCS7D02G347300	14.96	42.8333	6.4325	Peroxidase [Source:UniProtKB/TrEMBL;Acc:A0A1D6CN27]	GO:0006979;GO:0042744;GO:0016021;GO:0005576;GO:0009505;GO:0009506;GO:0020037;GO:0046872;GO:000460	BP:response to oxidative stress;BP:hydrogen peroxide catabolic process;CC:integral component of membrane;CC:extracellular region;CC:plant-type cell wall;CC:plasmodesma;MF:heme binding;MF:metal ion binding;MF:peroxidase activity;	K00430	E1.11.1.7	map00940	Phenylpropanoid biosynthesis	ENOG411051N;ENOG410XUVZ;ENOG41106HI	S:Function unknown;G:Carbohydrate transport and metabolism;P:Inorganic ion transport and metabolism	XP_020190543.1	peroxidase 1 [Aegilops tauschii subsp. strangulata]	sp|A5H8G4|PER1_MAIZE;	Peroxidase 1 OS=Zea mays OX=4577 GN=PER1 PE=1 SV=1;	PF00141.25	peroxidase	Peroxidase
TraesCS7D02G258300	7.02667	13.5	3.93833	-	GO:0005634;GO:0016787;GO:000551	CC:nucleus;MF:hydrolase activity;MF:protein binding;	K24348	UBXN1_4	map04141	Protein processing in endoplasmic reticulum	ENOG410XQQK	S:Function unknown	KAF7095429.1	hypothetical protein CFC21_097599 [Triticum aestivum]	sp|Q9ZU93|PUX2_ARATH;	Plant UBX domain-containing protein 2 OS=Arabidopsis thaliana OX=3702 GN=PUX2 PE=1 SV=4;	PF09409.12;PF00627.33	PUB;UBA	PUB domain;UBA/TS-N domain
TraesCS7D02G170800	3.38417	4.72917	2.09333	-	GO:0006511;GO:0016021;GO:0005886;GO:0030246;GO:0004672;GO:0046872;GO:0061630;GO:000552	BP:ubiquitin-dependent protein catabolic process;CC:integral component of membrane;CC:plasma membrane;MF:carbohydrate binding;MF:protein kinase activity;MF:metal ion binding;MF:ubiquitin protein ligase activity;MF:ATP binding;	K11982	RNF115_126	------	------	ENOG41121N2	O:Posttranslational modification, protein turnover, chaperones	XP_020156775.1	probable E3 ubiquitin-protein ligase RHC1A [Aegilops tauschii subsp. strangulata]	sp|O22197|RHC1A_ARATH;	Probable E3 ubiquitin-protein ligase RHC1A OS=Arabidopsis thaliana OX=3702 GN=RHC1A PE=2 SV=1;	PF13923.8;PF14369.8;PF13639.8;PF17123.7;PF00097.27;PF12678.9;PF13920.8;PF13445.8;PF14634.8;PF12861.9	zf-C3HC4_2;zinc_ribbon_9;zf-RING_2;zf-RING_11;zf-C3HC4;zf-rbx1;zf-C3HC4_3;zf-RING_UBOX;zf-RING_5;zf-ANAPC11	Zinc finger, C3HC4 type;zinc-ribbon;Ring finger domain;RING-like zinc finger;Zinc finger, C3HC4 type;RING-H2 zinc finger domain;Zinc finger, C3HC4 type;RING-type zinc-finger;zinc-RING finger domain;Anaphase-promoting complex subunit 11 RING-H2 finger
TraesCS7D02G086500	9.16417	23.1733	4.11083	-	GO:0016021;GO:001602	CC:integral component of membrane;CC:membrane;	------	------	------	------	ENOG410ZBCE	S:Function unknown	KAF7093468.1	hypothetical protein CFC21_095878 [Triticum aestivum]	------	------	PF12734.9	CYSTM	Cysteine-rich TM module stress tolerance
TraesCS7B02G377700	4.8425	6.82	1.58333	-	GO:0006355;GO:0005634;GO:0003700;GO:0046983;GO:000367	BP:regulation of transcription, DNA-templated;CC:nucleus;MF:transcription factor activity, sequence-specific DNA binding;MF:protein dimerization activity;MF:DNA binding;	------	------	------	------	COG5068	K:Transcription	KAF7104018.1	hypothetical protein CFC21_104944 [Triticum aestivum]	sp|Q6H711|MAD29_ORYSJ;	MADS-box transcription factor 29 OS=Oryza sativa subsp. japonica OX=39947 GN=MADS29 PE=2 SV=1;	PF01486.19;PF00319.20	K-box;SRF-TF	K-box region;SRF-type transcription factor
TraesCS7B02G154400	5.9725	11.8925	3.15	-	GO:0016787;GO:000551	MF:hydrolase activity;MF:protein binding;	K24348	UBXN1_4	map04141	Protein processing in endoplasmic reticulum	ENOG410XQQK	S:Function unknown	KAF7101173.1	hypothetical protein CFC21_102567 [Triticum aestivum]	sp|Q9ZU93|PUX2_ARATH;	Plant UBX domain-containing protein 2 OS=Arabidopsis thaliana OX=3702 GN=PUX2 PE=1 SV=3;	PF09409.12;PF00627.33	PUB;UBA	PUB domain;UBA/TS-N domain
TraesCS7A02G553500	9.20083	14.4092	6.44667	-	GO:001602	CC:integral component of membrane;	------	------	------	------	COG0071	O:Posttranslational modification, protein turnover, chaperones	KAF7099042.1	hypothetical protein CFC21_100732 [Triticum aestivum]	sp|Q38806|HSP22_ARATH;	22.0 kDa heat shock protein OS=Arabidopsis thaliana OX=3702 GN=HSP22.0 PE=2 SV=1;	PF00011.23	HSP20	Hsp20/alpha crystallin family
TraesCS7A02G339600	10.3933	20.8442	2.03417	Peroxidase [Source:UniProtKB/TrEMBL;Acc:A0A1D6BK39]	GO:0006979;GO:0098869;GO:0042744;GO:0005576;GO:0009505;GO:0009506;GO:0020037;GO:0046872;GO:0004601;GO:001649	BP:response to oxidative stress;BP:cellular oxidant detoxification;BP:hydrogen peroxide catabolic process;CC:extracellular region;CC:plant-type cell wall;CC:plasmodesma;MF:heme binding;MF:metal ion binding;MF:peroxidase activity;MF:oxidoreductase activity;	K00430	E1.11.1.7	map00940	Phenylpropanoid biosynthesis	ENOG411051N;ENOG410XUVZ;ENOG41106HI	S:Function unknown;G:Carbohydrate transport and metabolism;P:Inorganic ion transport and metabolism	XP_037458949.1	peroxidase 1-like [Triticum dicoccoides]	sp|A5H8G4|PER1_MAIZE;	Peroxidase 1 OS=Zea mays OX=4577 GN=PER1 PE=1 SV=1;	PF00141.25	peroxidase	Peroxidase
TraesCS7A02G257500	6.32917	11.3725	3.75833	-	GO:0005634;GO:0016787;GO:000551	CC:nucleus;MF:hydrolase activity;MF:protein binding;	K24348	UBXN1_4	map04141	Protein processing in endoplasmic reticulum	ENOG410XQQK	S:Function unknown	KAF7095430.1	hypothetical protein CFC21_097599 [Triticum aestivum]	sp|Q9ZU93|PUX2_ARATH;	Plant UBX domain-containing protein 2 OS=Arabidopsis thaliana OX=3702 GN=PUX2 PE=1 SV=2;	PF09409.12;PF00627.33;PF03634.15	PUB;UBA;TCP	PUB domain;UBA/TS-N domain;TCP family transcription factor
TraesCS7A02G243800	4.275	6.24583	2.08333	-	GO:001602	CC:integral component of membrane;	------	------	------	------	ENOG410Z57I	S:Function unknown	KAF7095267.1	hypothetical protein CFC21_097474 [Triticum aestivum]	------	------	------	------	------
TraesCS7A02G009800	22.4233	24.885	9.3475	-	GO:0005975;GO:0016021;GO:0050053;GO:0050306;GO:0016740;GO:000455	BP:carbohydrate metabolic process;CC:integral component of membrane;MF:levansucrase activity;MF:sucrose 1F-fructosyltransferase activity;MF:transferase activity;MF:hydrolase activity, hydrolyzing O-glycosyl compounds;	K21351	SST	------	------	COG1621	G:Carbohydrate transport and metabolism	XP_037461477.1	sucrose:sucrose 1-fructosyltransferase-like [Triticum dicoccoides]	sp|Q9FSV7|SST_FESAR;	Sucrose:sucrose 1-fructosyltransferase OS=Festuca arundinacea OX=4606 GN=1-SST PE=1 SV=1;	PF00251.22;PF08244.14;PF11837.10	Glyco_hydro_32N;Glyco_hydro_32C;DUF3357	Glycosyl hydrolases family 32 N-terminal domain;Glycosyl hydrolases family 32 C terminal;Domain of unknown function
TraesCS6D02G331800	3.47917	4.45583	2.36833	-	GO:001602	CC:integral component of membrane;	------	------	------	------	COG0398	S:Function unknown	KAF7091582.1	hypothetical protein CFC21_094147 [Triticum aestivum]	sp|Q55909|Y305_SYNY3;	TVP38/TMEM64 family membrane protein slr0305 OS=Synechocystis sp.;	PF09335.13	SNARE_assoc	SNARE associated Golgi protein
TraesCS6D02G284800	13.905	22.4142	9.49833	-	------	------	------	------	------	------	ENOG411068P	S:Function unknown	KAF7090999.1	hypothetical protein CFC21_093665 [Triticum aestivum]	------	------	------	------	------
TraesCS6D02G270900	6.455	6.62083	3.76833	-	GO:0006351;GO:0003700;GO:004698	BP:transcription, DNA-templated;MF:transcription factor activity, sequence-specific DNA binding;MF:protein dimerization activity;	------	------	------	------	ENOG411216Z	K:Transcription	KAF7090815.1	hypothetical protein CFC21_093509 [Triticum aestivum]	sp|Q9CAA4|BIM2_ARATH;	Transcription factor BIM2 OS=Arabidopsis thaliana OX=3702 GN=BIM2 PE=1 SV=1;	PF00010.28	HLH	Helix-loop-helix DNA-binding domain
TraesCS6D02G255700	3.845	4.3075	2.10083	-	GO:001602	CC:integral component of membrane;	------	------	------	------	ENOG41103PC	S:Function unknown	KAF7090638.1	hypothetical protein CFC21_093360 [Triticum aestivum]	------	------	------	------	------
TraesCS6B02G421700	3.73667	10.87	1.74167	Bidirectional sugar transporter SWEET [Source:UniProtKB/TrEMBL;Acc:A0A1D6AMI4]	GO:0008643;GO:0016021;GO:0005886;GO:005111	BP:carbohydrate transport;CC:integral component of membrane;CC:plasma membrane;MF:sugar transmembrane transporter activity;	K15382	SLC50A, SWEET	------	------	ENOG4111M4R	U:Intracellular trafficking, secretion, and vesicular transport	KAF7086834.1	hypothetical protein CFC21_090093 [Triticum aestivum]	sp|Q2QR07|SWT13_ORYSJ;	Bidirectional sugar transporter SWEET13 OS=Oryza sativa subsp. japonica OX=39947 GN=SWEET13 PE=2 SV=1;	PF03083.18;PF04193.16	MtN3_slv;PQ-loop	Sugar efflux transporter for intercellular exchange;PQ loop repeat
TraesCS6B02G421500	9.0125	23.72	3.7075	Bidirectional sugar transporter SWEET [Source:UniProtKB/TrEMBL;Acc:W5GM26]	GO:0008643;GO:0016021;GO:0005886;GO:005111	BP:carbohydrate transport;CC:integral component of membrane;CC:plasma membrane;MF:sugar transmembrane transporter activity;	K15382	SLC50A, SWEET	------	------	ENOG4111M4R	U:Intracellular trafficking, secretion, and vesicular transport	XP_037472395.1	bidirectional sugar transporter SWEET13-like [Triticum dicoccoides]	sp|Q2QR07|SWT13_ORYSJ;	Bidirectional sugar transporter SWEET13 OS=Oryza sativa subsp. japonica OX=39947 GN=SWEET13 PE=2 SV=1;	PF03083.18;PF04193.16	MtN3_slv;PQ-loop	Sugar efflux transporter for intercellular exchange;PQ loop repeat
TraesCS6B02G356800	4.4475	9.145	3.4825	Nitrate reductase [Source:UniProtKB/TrEMBL;Acc:A0A1D6S9I8]	GO:0042128;GO:0006809;GO:0043546;GO:0050464;GO:0020037;GO:0009703;GO:0030151;GO:0071949;GO:001649	BP:nitrate assimilation;BP:nitric oxide biosynthetic process;MF:molybdopterin cofactor binding;MF:nitrate reductas;MF:heme binding;MF:nitrate reductas;MF:molybdenum ion binding;MF:FAD binding;MF:oxidoreductase activity;	K10534	NR	map00910	Nitrogen metabolism	COG0543;COG5274;COG5274	C:Energy production and conversion;I:Lipid transport and metabolism	KAF7086085.1	hypothetical protein CFC21_089429 [Triticum aestivum]	sp|P27968|NIA7_HORVU;	Nitrate reductase [NA;	PF00174.21;PF03404.18;PF00970.26;PF00175.23;PF00173.30;PF08030.14	Oxidored_molyb;Mo-co_dimer;FAD_binding_6;NAD_binding_1;Cyt-b5;NAD_binding_6	Oxidoreductase molybdopterin binding domain;Mo-co oxidoreductase dimerisation domain;Oxidoreductase FAD-binding domain;Oxidoreductase NAD-binding domain;Cytochrome b5-like Heme/Steroid binding domain;Ferric reductase NAD binding domain
TraesCS6B02G333900	8.46333	15.8592	7.00333	-	------	------	------	------	------	------	ENOG411068P	S:Function unknown	XP_037453701.1	uncharacterized protein LOC119324068 [Triticum dicoccoides]	------	------	------	------	------
TraesCS6B02G111600	8.435	15.38	5.89917	-	GO:001602	CC:integral component of membrane;	------	------	------	------	ENOG410YUS6;ENOG410Z7Z7	S:Function unknown;	KAF7083070.1	hypothetical protein CFC21_086888 [Triticum aestivum]	------	------	------	------	------
TraesCS6B02G088900	4.97	7.38917	1.7725	-	GO:000550	MF:calcium ion binding;	K24345	KIC	------	------	COG5126;COG5126;COG5126	D:Cell cycle control, cell division, chromosome partitioning;T:Signal transduction mechanisms;Z:Cytoskeleton	XP_020166842.2	uncharacterized protein LOC109752357 [Aegilops tauschii subsp. strangulata]	sp|Q9ZPX9|KIC_ARATH;	Calcium-binding protein KIC OS=Arabidopsis thaliana OX=3702 GN=KIC PE=1 SV=2;	PF13833.8;PF00036.34	EF-hand_8;EF-hand_1	EF-hand domain pair;EF hand
TraesCS6B02G069300	3.7975	5.88917	3.9	-	GO:0006468;GO:0005524;GO:000467	BP:protein phosphorylation;MF:ATP binding;MF:protein kinase activity;	------	------	------	------	COG0515	T:Signal transduction mechanisms	KAF7082580.1	hypothetical protein CFC21_086448 [Triticum aestivum]	sp|Q9SII6|PIX13_ARATH;	Probable serine/threonine-protein kinase PIX13 OS=Arabidopsis thaliana OX=3702 GN=PIX13 PE=1 SV=2;	PF07714.19;PF00069.27	PK_Tyr_Ser-Thr;Pkinase	Protein tyrosine and serine/threonine kinase;Protein kinase domain
TraesCS6A02G089200	15.1983	25.32	10.9975	-	GO:001602	CC:integral component of membrane;	------	------	------	------	ENOG410YUS6;ENOG410Z7Z7	S:Function unknown;	KAF7077772.1	hypothetical protein CFC21_082288 [Triticum aestivum]	------	------	------	------	------
TraesCS5D02G346000	7.03417	9.87667	4.20917	-	------	------	------	------	------	------	ENOG41106TM	S:Function unknown	KAF7074072.1	hypothetical protein CFC21_078985 [Triticum aestivum]	------	------	PF05056.14	DUF674	Protein of unknown function
TraesCS5D02G149400	5.73167	7.08833	3.20667	-	GO:0006355;GO:0005737;GO:0005634;GO:0003700;GO:0000976;GO:004687	BP:regulation of transcription, DNA-templated;CC:cytoplasm;CC:nucleus;MF:transcription factor activity, sequence-specific DNA binding;MF:transcription regulatory region sequence-specific DNA binding;MF:metal ion binding;	------	------	------	------	ENOG410YXCJ	S:Function unknown	XP_020160851.1	mini zinc finger protein 1 [Aegilops tauschii subsp. strangulata]	sp|B8BIU8|MIF1_ORYSI;	Mini zinc finger protein 1 OS=Oryza sativa subsp. indica OX=39946 GN=MIF1 PE=3 SV=1;	PF04770.14	ZF-HD_dimer	ZF-HD protein dimerisation region
TraesCS5D02G126500	4.66833	5.74917	3.08667	-	------	------	------	------	------	------	ENOG410Y7TM	S:Function unknown	BAK03868.1	predicted protein [Hordeum vulgare subsp. vulgare]	------	------	PF08991.12	MTCP1	Mature-T-Cell Proliferation I type
TraesCS5B02G255800	7.75417	10.6325	3.72167	-	GO:001602	CC:integral component of membrane;	------	------	------	------	ENOG41104U9	S:Function unknown	XP_037442192.1	uncharacterized protein LOC119310611 [Triticum dicoccoides]	------	------	------	------	------
TraesCS5B02G063400	3.27667	5.64667	2.3225	-	------	------	------	------	------	------	COG0517	S:Function unknown	KAF7063589.1	hypothetical protein CFC21_070104 [Triticum aestivum]	sp|Q9LEV3|CBSX3_ARATH;	CBS domain-containing protein CBSX3, mitochondrial OS=Arabidopsis thaliana OX=3702 GN=CBSX3 PE=1 SV=1;	PF00571.30	CBS	CBS domain
TraesCS5A02G340800	6.46583	7.7925	3.60417	-	------	------	------	------	------	------	ENOG41106TM	S:Function unknown	XP_037431361.1	uncharacterized protein LOC119297834 [Triticum dicoccoides]	------	------	PF05056.14	DUF674	Protein of unknown function
TraesCS5A02G113400	5.19167	6.895	3.20167	-	GO:0006508;GO:000419	BP:proteolysis;MF:aspartic-type endopeptidase activity;	------	------	------	------	ENOG410XNV7	O:Posttranslational modification, protein turnover, chaperones	VAI15020.1	unnamed protein product [Triticum turgidum subsp. durum]	sp|Q0IU52|ASP1_ORYSJ;	Aspartic proteinase Asp1 OS=Oryza sativa subsp. japonica OX=39947 GN=ASP1 PE=2 SV=1;	PF14543.8;PF00026.25;PF14541.8	TAXi_N;Asp;TAXi_C	Xylanase inhibitor N-terminal;Eukaryotic aspartyl protease;Xylanase inhibitor C-terminal
TraesCS4D02G272100	11.0558	14.56	7.04833	-	GO:001602	CC:integral component of membrane;	------	------	------	------	COG0071	O:Posttranslational modification, protein turnover, chaperones	KAF7055214.1	hypothetical protein CFC21_062775 [Triticum aestivum]	sp|D9UBX6|RTM2B_ARATH;	Inactive protein RESTRICTED TEV MOVEMENT 2 OS=Arabidopsis thaliana OX=3702 GN=RTM2 PE=3 SV=1;	PF00011.23	HSP20	Hsp20/alpha crystallin family
TraesCS4D02G230300	5.51167	7.28417	4.78917	-	------	------	------	------	------	------	ENOG410ZCT7	S:Function unknown	KAF7054727.1	hypothetical protein CFC21_062356 [Triticum aestivum]	sp|Q42485|ZFP1_ARATH;	Zinc finger protein 1 OS=Arabidopsis thaliana OX=3702 GN=ZFP1 PE=2 SV=1;	PF13912.8	zf-C2H2_6	C2H2-type zinc finger
TraesCS4D02G013100	7.52417	9.02667	4.36667	-	GO:001602	CC:integral component of membrane;	------	------	------	------	COG0071	O:Posttranslational modification, protein turnover, chaperones	KAF7044533.1	hypothetical protein CFC21_053748, partial [Triticum aestivum]	sp|D9UBX6|RTM2B_ARATH;	Inactive protein RESTRICTED TEV MOVEMENT 2 OS=Arabidopsis thaliana OX=3702 GN=RTM2 PE=3 SV=1;	PF00011.23	HSP20	Hsp20/alpha crystallin family
TraesCS4B02G014900	8.16667	9.49833	5.02417	-	GO:001602	CC:integral component of membrane;	------	------	------	------	COG0071	O:Posttranslational modification, protein turnover, chaperones	XP_037428650.1	inactive protein RESTRICTED TEV MOVEMENT 2-like [Triticum dicoccoides]	sp|D9UBX6|RTM2B_ARATH;	Inactive protein RESTRICTED TEV MOVEMENT 2 OS=Arabidopsis thaliana OX=3702 GN=RTM2 PE=3 SV=1;	PF00011.23	HSP20	Hsp20/alpha crystallin family
TraesCS4A02G208400	10.55	20.6967	2.45167	-	------	------	------	------	------	------	ENOG410Y1IV	S:Function unknown	KAF7043530.1	hypothetical protein CFC21_052867 [Triticum aestivum]	------	------	PF02496.18	ABA_WDS	ABA/WDS induced protein
TraesCS3D02G500700	10.9433	16.7967	7.885	-	------	------	------	------	------	------	ENOG410YT39	S:Function unknown	XP_020196999.1	uncharacterized protein LOC109782799 [Aegilops tauschii subsp. strangulata]	------	------	------	------	------
TraesCS3D02G222300	4.03083	16.6433	2.51083	-	GO:001602	CC:integral component of membrane;	------	------	------	------	ENOG41108J3	S:Function unknown	VAH62090.1	unnamed protein product [Triticum turgidum subsp. durum]	------	------	------	------	------
TraesCS3D02G213300	27.1167	38.8758	14.1875	-	------	------	------	------	------	------	ENOG410ZU3Z;COG0071	S:Function unknown;O:Posttranslational modification, protein turnover, chaperones	XP_020198609.1	21.9 kDa heat shock protein [Aegilops tauschii subsp. strangulata]	sp|P19037|HS181_ARATH;	18.1 kDa class I heat shock protein OS=Arabidopsis thaliana OX=3702 GN=HSP18.1 PE=1 SV=1;	PF00011.23	HSP20	Hsp20/alpha crystallin family
TraesCS3D02G159800	4.07417	4.81083	1.90417	Chlorophyll b reductase, Leaf senescenc [Source: Projected from Oryza sativa (Os01g0227100)]	GO:0015996;GO:0010304;GO:0009536;GO:0016021;GO:0034256;GO:001649	BP:chlorophyll catabolic process;BP:PSII associated light-harvesting complex II catabolic process;CC:plastid;CC:integral component of membrane;MF:chlorophyl;MF:oxidoreductase activity;	K13606	NOL, NYC1	map00860	Porphyrin and chlorophyll metabolism	COG1028	S:Function unknown	XP_020169404.1	probable chlorophyll(ide) b reductase NYC1, chloroplastic [Aegilops tauschii subsp. strangulata]	sp|Q5N800|NYC1_ORYSJ;	Probable chlorophyl;	PF00106.27;PF13561.8;PF08659.12	adh_short;adh_short_C2;KR	short chain dehydrogenase;Enoyl;KR domain
TraesCS3D02G050800	15.3733	17.9917	8.335	Reticulon-like protein [Source:UniProtKB/TrEMBL;Acc:A0A1D5WQ94]	GO:0016021;GO:000578	CC:integral component of membrane;CC:endoplasmic reticulum membrane;	------	------	------	------	ENOG410XPKH	U:Intracellular trafficking, secretion, and vesicular transport	KAF7020672.1	hypothetical protein CFC21_033739 [Triticum aestivum]	sp|Q9FFS0|RTNLD_ARATH;	Reticulon-like protein B4 OS=Arabidopsis thaliana OX=3702 GN=RTNLB4 PE=1 SV=1;	PF02453.19	Reticulon	Reticulon
TraesCS3B02G554400	6.93417	8.67583	4.23333	-	------	------	------	------	------	------	ENOG410YT39	S:Function unknown	KAF7033368.1	hypothetical protein CFC21_044475 [Triticum aestivum]	------	------	------	------	------
TraesCS3B02G388000	5.00333	8.97667	3.14	-	GO:0016020;GO:001629	CC:membrane;MF:lipase activity;	K18368;K01054	CSE;MGLL	map00940;map00561	Phenylpropanoid biosynthesis;Glycerolipid metabolism	COG2267	I:Lipid transport and metabolism	KAE8789890.1	caffeoylshikimate esterase-like [Hordeum vulgare]	sp|Q9C942|CSE_ARATH;	Caffeoylshikimate esterase OS=Arabidopsis thaliana OX=3702 GN=CSE PE=1 SV=1;	PF12146.10;PF00561.22;PF12697.9;PF01738.20	Hydrolase_4;Abhydrolase_1;Abhydrolase_6;DLH	Serine aminopeptidase, S33;alpha/beta hydrolase fold;Alpha/beta hydrolase family;Dienelactone hydrolase family
TraesCS3B02G257100	5.74333	6.72917	3.71083	-	GO:001602	CC:integral component of membrane;	------	------	------	------	ENOG41115QT	S:Function unknown	XP_020147469.1	aspartate, glycine, lysine and serine-rich protein [Aegilops tauschii subsp. strangulata]	sp|Q9M069|E137_ARATH;	Glucan endo-1,3-beta-glucosidase 7 OS=Arabidopsis thaliana OX=3702 GN=At4g34480 PE=1 SV=2;	PF07983.15	X8	X8 domain
TraesCS3A02G526100	7.7875	13.1742	2.355	-	------	------	------	------	------	------	ENOG411069K	S:Function unknown	KAF7026470.1	hypothetical protein CFC21_038579 [Triticum aestivum]	------	------	------	------	------
TraesCS3A02G493000	19.8542	29.7258	13.0958	-	------	------	------	------	------	------	ENOG410YT39	S:Function unknown	EMS47763.1	hypothetical protein TRIUR3_23306 [Triticum urartu]	------	------	------	------	------
TraesCS3A02G261500	4.80167	9.02333	2.6525	Reticulon-like protein [Source:UniProtKB/TrEMBL;Acc:A0A341S606]	------	------	------	------	------	------	ENOG410XPKH	U:Intracellular trafficking, secretion, and vesicular transport	KAF7023380.1	hypothetical protein CFC21_035904 [Triticum aestivum]	sp|Q9SUT9|RTNLB_ARATH;	Reticulon-like protein B2 OS=Arabidopsis thaliana OX=3702 GN=RTNLB2 PE=1 SV=1;	PF02453.19	Reticulon	Reticulon
TraesCS3A02G227300	5.6575	6.38583	3.7875	-	------	------	------	------	------	------	ENOG41115QT	S:Function unknown	KAF7022885.1	hypothetical protein CFC21_035517 [Triticum aestivum]	sp|Q9M069|E137_ARATH;	Glucan endo-1,3-beta-glucosidase 7 OS=Arabidopsis thaliana OX=3702 GN=At4g34480 PE=1 SV=2;	PF07983.15	X8	X8 domain
TraesCS3A02G210500	5.35167	9.195	2.87583	-	------	------	------	------	------	------	ENOG410ZU3Z;COG0071	S:Function unknown;O:Posttranslational modification, protein turnover, chaperones	XP_037405760.1	uncharacterized protein LOC119268271 [Triticum dicoccoides]	sp|Q41560|HS16B_WHEAT;	16.9 kDa class I heat shock protein 2 OS=Triticum aestivum OX=4565 GN=hsp16.9B PE=1 SV=1;	PF00011.23	HSP20	Hsp20/alpha crystallin family
TraesCS3A02G180700	7.33333	8.99083	4.865	-	GO:001602	CC:integral component of membrane;	------	------	------	------	------	------	EMS51181.1	hypothetical protein TRIUR3_33406 [Triticum urartu]	------	------	------	------	------
TraesCS3A02G051200	9.44333	12.8092	5.165	Reticulon-like protein [Source:UniProtKB/TrEMBL;Acc:W5CLI9]	GO:0016021;GO:000578	CC:integral component of membrane;CC:endoplasmic reticulum membrane;	------	------	------	------	ENOG410XPKH	U:Intracellular trafficking, secretion, and vesicular transport	KAF7020672.1	hypothetical protein CFC21_033739 [Triticum aestivum]	sp|Q9FFS0|RTNLD_ARATH;	Reticulon-like protein B4 OS=Arabidopsis thaliana OX=3702 GN=RTNLB4 PE=1 SV=1;	PF02453.19	Reticulon	Reticulon
TraesCS3A02G007700	6.8775	13.6042	5.785	-	------	------	------	------	------	------	------	------	XP_020201144.1	branchpoint-bridging protein [Aegilops tauschii subsp. strangulata]	------	------	------	------	------
TraesCS2D02G434900	4.905	6.96167	3.005	-	GO:0005509;GO:004830	MF:calcium ion binding;MF:calcium-dependent protein binding;	------	------	------	------	ENOG411177Q	S:Function unknown	XP_037489462.1	uncharacterized protein LOC119368258 [Triticum dicoccoides]	------	------	------	------	------
TraesCS2D02G404200	6.47833	8.5375	4.06917	calcium-dependent protein kinase 29 [Source:Projected from Arabidopsis thaliana (AT1G76040) TAIR;Acc:AT1G76040]	GO:0006468;GO:0018105;GO:0016310;GO:1901002;GO:0050832;GO:0035556;GO:0046777;GO:0005737;GO:0005634;GO:0005886;GO:0009931;GO:0004683;GO:0016301;GO:0000166;GO:0004674;GO:0016740;GO:0005516;GO:0004672;GO:0046872;GO:0005524;GO:000550	BP:protein phosphorylation;BP:peptidyl-serine phosphorylation;BP:phosphorylation;BP:positive regulation of response to salt stress;BP:defense response to fungus;BP:intracellular signal transduction;BP:protein autophosphorylation;CC:cytoplasm;CC:nucleus;CC:plasma membrane;MF:calcium-dependent protein serine/threonine kinase activity;MF:calmodulin-dependent protein kinase activity;MF:kinase activit…	K13412	CPK	map04626	Plant-pathogen interaction	ENOG410XRMJ	T:Signal transduction mechanisms	XP_020179707.1	calcium-dependent protein kinase 12 [Aegilops tauschii subsp. strangulata]	sp|Q7XSQ5|CDPKC_ORYSJ;	Calcium-dependent protein kinase 12 OS=Oryza sativa subsp. japonica OX=39947 GN=CPK12 PE=2 SV=2;	PF00069.27;PF00036.34;PF13499.8;PF07714.19;PF13405.8;PF13202.8;PF13833.8;PF10591.11;PF12763.9;PF14658.8;PF08976.13;PF14531.8	Pkinase;EF-hand_1;EF-hand_7;PK_Tyr_Ser-Thr;EF-hand_6;EF-hand_5;EF-hand_8;SPARC_Ca_bdg;EF-hand_4;EF-hand_9;EF-hand_11;Kinase-like	Protein kinase domain;EF hand;EF-hand domain pair;Protein tyrosine and serine/threonine kinase;EF-hand domain;EF hand;EF-hand domain pair;Secreted protein acidic and rich in cysteine Ca binding region;Cytoskeletal-regulatory complex EF hand;EF-hand domain;EF-hand domain;Kinase-like
TraesCS2D02G403600	8.4025	11.7192	5.2825	Sucrose synthase [Source:UniProtKB/TrEMBL;Acc:A0A1D6RP57]	GO:0005985;GO:0016740;GO:0016157;GO:001675	BP:sucrose metabolic process;MF:transferase activity;MF:sucrose synthase activity;MF:transferase activity, transferring glycosyl groups;	K00695	SUS	map00500	Starch and sucrose metabolism	COG0438	M:Cell wall/membrane/envelope biogenesis	KAF7017794.1	hypothetical protein CFC21_031166 [Triticum aestivum]	sp|Q7XNX6|SUS7_ORYSJ;	Sucrose synthase 7 OS=Oryza sativa subsp. japonica OX=39947 GN=SUS7 PE=2 SV=2;	PF00862.21;PF00534.22;PF13692.8;PF13524.8	Sucrose_synth;Glycos_transf_1;Glyco_trans_1_4;Glyco_trans_1_2	Sucrose synthase;Glycosyl transferases group 1;Glycosyl transferases group 1;Glycosyl transferases group 1
TraesCS2D02G070500	11.6308	18.5692	6.89	-	GO:0000302;GO:0006979;GO:0042744;GO:0034599;GO:0005778;GO:0016021;GO:0009507;GO:0020037;GO:0016688;GO:0046872;GO:000460	BP:response to reactive oxygen species;BP:response to oxidative stress;BP:hydrogen peroxide catabolic process;BP:cellular response to oxidative stress;CC:peroxisomal membrane;CC:integral component of membrane;CC:chloroplast;MF:heme binding;MF:L-ascorbate peroxidase activity;MF:metal ion binding;MF:peroxidase activity;	K00434	E1.11.1.11	map00480;map00053	Glutathione metabolism;Ascorbate and aldarate metabolism	COG0376	P:Inorganic ion transport and metabolism	SPT15994.1	unnamed protein product [Triticum aestivum]	sp|Q0JEQ2|APX3_ORYSJ;	Probable L-ascorbate peroxidase 3, peroxisomal OS=Oryza sativa subsp. japonica OX=39947 GN=APX3 PE=2 SV=1;	PF00141.25	peroxidase	Peroxidase
TraesCS2D02G047500	11.6267	20.1658	8.51333	-	GO:0046686;GO:0032259;GO:0005739;GO:000816	BP:response to cadmium ion;BP:methylation;CC:mitochondrion;MF:methyltransferase activity;	------	------	------	------	ENOG4111IQH	S:Function unknown	SPT15803.1	unnamed protein product [Triticum aestivum]	sp|Q55EX9|Y8948_DICDI;	Putative methyltransferase DDB_G0268948 OS=Dictyostelium discoideum OX=44689 GN=DDB_G0268948 PE=1 SV=2;	PF08241.14;PF13649.8;PF08242.14	Methyltransf_11;Methyltransf_25;Methyltransf_12	Methyltransferase domain;Methyltransferase domain;Methyltransferase domain
TraesCS2B02G424300	7.84417	10.795	4.65917	Sucrose synthase [Source:UniProtKB/TrEMBL;Acc:W5BF91]	GO:0005985;GO:0016157;GO:001675	BP:sucrose metabolic process;MF:sucrose synthase activity;MF:transferase activity, transferring glycosyl groups;	K00695	SUS	map00500	Starch and sucrose metabolism	COG0438	M:Cell wall/membrane/envelope biogenesis	KAF7010434.1	hypothetical protein CFC21_024850 [Triticum aestivum]	sp|Q7XNX6|SUS7_ORYSJ;	Sucrose synthase 7 OS=Oryza sativa subsp. japonica OX=39947 GN=SUS7 PE=2 SV=2;	PF00862.21;PF00534.22;PF13692.8;PF13524.8	Sucrose_synth;Glycos_transf_1;Glyco_trans_1_4;Glyco_trans_1_2	Sucrose synthase;Glycosyl transferases group 1;Glycosyl transferases group 1;Glycosyl transferases group 1
TraesCS2B02G337300	2.9125	4.49917	2.7425	-	GO:005286	MF:glucan endo-1,3-beta-glucanase activity, C-3 substituted reducing group;	------	------	------	------	ENOG410YKWP	S:Function unknown	KAF7009428.1	hypothetical protein CFC21_023966 [Triticum aestivum]	------	------	------	------	------
TraesCS2B02G334000	5.14917	6.10167	3.2725	Glutamate decarboxylase [Source:UniProtKB/TrEMBL;Acc:W5BD76]	GO:0019752;GO:0006536;GO:0006538;GO:0005829;GO:0016830;GO:0016740;GO:0004351;GO:0003824;GO:003017	BP:carboxylic acid metabolic process;BP:glutamate metabolic process;BP:glutamate catabolic process;CC:cytosol;MF:carbon-carbon lyase activity;MF:transferase activity;MF:glutamate decarboxylase activity;MF:catalytic activity;MF:pyridoxal phosphate binding;	K01580	E4.1.1.15, gadB, gadA, GAD	map00250;map00430;map00410;map00650	Alanine, aspartate and glutamate metabolism;Taurine and hypotaurine metabolism;beta-Alanine metabolism;Butanoate metabolism	COG0076	E:Amino acid transport and metabolism	VAH48248.1	unnamed protein product [Triticum turgidum subsp. durum]	sp|Q07346|DCE_PETHY;	Glutamate decarboxylase OS=Petunia hybrida OX=4102 GN=GAD PE=1 SV=1;	PF00282.21;PF00266.21	Pyridoxal_deC;Aminotran_5	Pyridoxal-dependent decarboxylase conserved domain;Aminotransferase class-V
TraesCS2B02G324200	13.7642	16.485	6.94	-	GO:0120009;GO:0035627;GO:0005737;GO:0016020;GO:0005829;GO:1902388;GO:1902387;GO:012001	BP:intermembrane lipid transfer;BP:ceramide transport;CC:cytoplasm;CC:membrane;CC:cytosol;MF:ceramide 1-phosphate transporter activity;MF:ceramide 1-phosphate binding;MF:lipid transfer activity;	------	------	------	------	ENOG410YFEA	U:Intracellular trafficking, secretion, and vesicular transport	KAF7009268.1	hypothetical protein CFC21_023829 [Triticum aestivum]	sp|Q9LU33|GLTP3_ARATH;	Glycolipid transfer protein 3 OS=Arabidopsis thaliana OX=3702 GN=GLTP3 PE=2 SV=1;	PF08718.13	GLTP	Glycolipid transfer protein
TraesCS2B02G137700	16.5242	25.075	7.57917	-	------	------	------	------	------	------	------	------	KAF7006912.1	hypothetical protein CFC21_021900 [Triticum aestivum]	------	------	PF05887.13	Trypan_PARP	Procyclic acidic repetitive protein
TraesCS2B02G087400	14.4208	21.7425	8.71167	-	GO:0000302;GO:0006979;GO:0042744;GO:0034599;GO:0005778;GO:0016021;GO:0009507;GO:0020037;GO:0016688;GO:0046872;GO:000460	BP:response to reactive oxygen species;BP:response to oxidative stress;BP:hydrogen peroxide catabolic process;BP:cellular response to oxidative stress;CC:peroxisomal membrane;CC:integral component of membrane;CC:chloroplast;MF:heme binding;MF:L-ascorbate peroxidase activity;MF:metal ion binding;MF:peroxidase activity;	K00434	E1.11.1.11	map00480;map00053	Glutathione metabolism;Ascorbate and aldarate metabolism	COG0376	P:Inorganic ion transport and metabolism	XP_037483232.1	probable L-ascorbate peroxidase 3, peroxisomal [Triticum dicoccoides]	sp|Q0JEQ2|APX3_ORYSJ;	Probable L-ascorbate peroxidase 3, peroxisomal OS=Oryza sativa subsp. japonica OX=39947 GN=APX3 PE=2 SV=1;	PF00141.25	peroxidase	Peroxidase
TraesCS2A02G510400	4.07917	7.3075	1.8175	-	GO:001678	MF:hydrolase activity;	K13051	ASRGL1, iaaA	map00460;map00250	Cyanoamino acid metabolism;Alanine, aspartate and glutamate metabolism	COG1446	E:Amino acid transport and metabolism	XP_037479703.1	probable isoaspartyl peptidase/L-asparaginase 2 [Triticum dicoccoides]	sp|Q8GXG1|ASPGB_ARATH;	Probable isoaspartyl peptidase/L-asparaginase 2 OS=Arabidopsis thaliana OX=3702 GN=At3g16150 PE=2 SV=2;	PF01112.20	Asparaginase_2	Asparaginase
TraesCS2A02G406700	8.48083	10.8408	5.14583	Sucrose synthase [Source:UniProtKB/TrEMBL;Acc:W5AUQ5]	GO:0005985;GO:0016157;GO:001675	BP:sucrose metabolic process;MF:sucrose synthase activity;MF:transferase activity, transferring glycosyl groups;	K00695	SUS	map00500	Starch and sucrose metabolism	COG0438	M:Cell wall/membrane/envelope biogenesis	XP_037478877.1	sucrose synthase 7-like isoform X1 [Triticum dicoccoides]	sp|Q7XNX6|SUS7_ORYSJ;	Sucrose synthase 7 OS=Oryza sativa subsp. japonica OX=39947 GN=SUS7 PE=2 SV=2;	PF00862.21;PF00534.22;PF13692.8;PF13524.8	Sucrose_synth;Glycos_transf_1;Glyco_trans_1_4;Glyco_trans_1_2	Sucrose synthase;Glycosyl transferases group 1;Glycosyl transferases group 1;Glycosyl transferases group 1
TraesCS2A02G315800	5.52833	5.82	3.35	Glutamate decarboxylase [Source:UniProtKB/TrEMBL;Acc:A0A1D5T8T1]	GO:0019752;GO:0006536;GO:0006538;GO:0005829;GO:0016830;GO:0016740;GO:0004351;GO:0003824;GO:003017	BP:carboxylic acid metabolic process;BP:glutamate metabolic process;BP:glutamate catabolic process;CC:cytosol;MF:carbon-carbon lyase activity;MF:transferase activity;MF:glutamate decarboxylase activity;MF:catalytic activity;MF:pyridoxal phosphate binding;	K01580	E4.1.1.15, gadB, gadA, GAD	map00250;map00430;map00410;map00650	Alanine, aspartate and glutamate metabolism;Taurine and hypotaurine metabolism;beta-Alanine metabolism;Butanoate metabolism	COG0076	E:Amino acid transport and metabolism	XP_037477966.1	glutamate decarboxylase 2-like [Triticum dicoccoides]	sp|Q42472|DCE2_ARATH;	Glutamate decarboxylase 2 OS=Arabidopsis thaliana OX=3702 GN=GAD2 PE=1 SV=1;	PF00282.21;PF00266.21	Pyridoxal_deC;Aminotran_5	Pyridoxal-dependent decarboxylase conserved domain;Aminotransferase class-V
TraesCS2A02G071700	12.8775	17.7775	7.66333	-	GO:0000302;GO:0006979;GO:0042744;GO:0034599;GO:0005778;GO:0016021;GO:0009507;GO:0020037;GO:0016688;GO:0046872;GO:000460	BP:response to reactive oxygen species;BP:response to oxidative stress;BP:hydrogen peroxide catabolic process;BP:cellular response to oxidative stress;CC:peroxisomal membrane;CC:integral component of membrane;CC:chloroplast;MF:heme binding;MF:L-ascorbate peroxidase activity;MF:metal ion binding;MF:peroxidase activity;	K00434	E1.11.1.11	map00480;map00053	Glutathione metabolism;Ascorbate and aldarate metabolism	COG0376	P:Inorganic ion transport and metabolism	SPT15994.1	unnamed protein product [Triticum aestivum]	sp|Q0JEQ2|APX3_ORYSJ;	Probable L-ascorbate peroxidase 3, peroxisomal OS=Oryza sativa subsp. japonica OX=39947 GN=APX3 PE=2 SV=1;	PF00141.25	peroxidase	Peroxidase
TraesCS1D02G445100	9.32833	14.4008	6.53	-	------	------	------	------	------	------	COG0071	O:Posttranslational modification, protein turnover, chaperones	XP_040248561.1	nucleolar protein dao-5 [Aegilops tauschii subsp. strangulata]	sp|Q652V8|HSP16_ORYSJ;	16.0 kDa heat shock protein, peroxisomal OS=Oryza sativa subsp. japonica OX=39947 GN=HSP16.0 PE=2 SV=1;	PF00011.23	HSP20	Hsp20/alpha crystallin family
TraesCS1D02G369200	6.71	11.9492	3.87917	-	------	------	------	------	------	------	ENOG410Y2SY	S:Function unknown	KAF6997177.1	hypothetical protein CFC21_013433 [Triticum aestivum]	sp|P14928|LEA1_HORVU;	ABA-inducible protein PHV A1 OS=Hordeum vulgare OX=4513 GN=HVA1 PE=2 SV=1;	PF02987.18;PF01442.20	LEA_4;Apolipoprotein	Late embryogenesis abundant protein;Apolipoprotein A1/A4/E domain
TraesCS1D02G276100	5.32417	6.98417	3.40583	-	GO:0006355;GO:0006351;GO:0003700;GO:004356	BP:regulation of transcription, DNA-templated;BP:transcription, DNA-templated;MF:transcription factor activity, sequence-specific DNA binding;MF:sequence-specific DNA binding;	K14431	TGA	map04075	Plant hormone signal transduction	ENOG410YEKH	K:Transcription	XP_020176117.1	transcription factor TGAL5 isoform X1 [Aegilops tauschii subsp. strangulata]	sp|Q6F2N0|TGAL5_ORYSJ;	Transcription factor TGAL5 OS=Oryza sativa subsp. japonica OX=39947 GN=TGAL5 PE=1 SV=1;	PF14144.8;PF00170.23;PF07716.17	DOG1;bZIP_1;bZIP_2	Seed dormancy control;bZIP transcription factor;Basic region leucine zipper
TraesCS1D02G257800	5.16833	8.61083	3.23083	-	GO:0006749;GO:0005737;GO:0016740;GO:0004364;GO:000551	BP:glutathione metabolic process;CC:cytoplasm;MF:transferase activity;MF:glutathione transferase activity;MF:protein binding;	K00799	GST, gst	map00480	Glutathione metabolism	ENOG410XSIX	O:Posttranslational modification, protein turnover, chaperones	XP_020191330.1	glutathione transferase GST 23 [Aegilops tauschii subsp. strangulata]	sp|Q9FQA3|GST23_MAIZE;	Glutathione transferase GST 23 OS=Zea mays OX=4577 PE=2 SV=1;	PF13417.8;PF02798.22;PF13409.8;PF13410.8;PF00043.27	GST_N_3;GST_N;GST_N_2;GST_C_2;GST_C	Glutathione S-transferase, N-terminal domain;Glutathione S-transferase, N-terminal domain;Glutathione S-transferase, N-terminal domain;Glutathione S-transferase, C-terminal domain;Glutathione S-transferase, C-terminal domain
TraesCS1D02G241700	6.52083	9.53167	4.7975	-	GO:0071555;GO:0016021;GO:0000139;GO:001675	BP:cell wall organization;CC:integral component of membrane;CC:Golgi membrane;MF:transferase activity, transferring glycosyl groups;	K11714	RGXT	------	------	ENOG410YT39	S:Function unknown	KAF6995674.1	hypothetical protein CFC21_012129, partial [Triticum aestivum]	------	------	------	------	------
TraesCS1D02G215400	8.04917	18.9608	3.93917	-	GO:0019953;GO:0005618;GO:0016020;GO:000557	BP:sexual reproduction;CC:cell wall;CC:membrane;CC:extracellular region;	------	------	------	------	ENOG41104H4	G:Carbohydrate transport and metabolism	XP_020164236.1	expansin-B3 [Aegilops tauschii subsp. strangulata]	sp|Q336T5|EXPB3_ORYSJ;	Expansin-B3 OS=Oryza sativa subsp. japonica OX=39947 GN=EXPB3 PE=2 SV=2;	PF01357.23;PF03330.20	Expansin_C;DPBB_1	Expansin C-terminal domain;Lytic transglycolase
TraesCS1D02G138200	7.38333	11.3733	4.88167	-	GO:001602	CC:integral component of membrane;	------	------	------	------	COG0071;COG1357	O:Posttranslational modification, protein turnover, chaperones;S:Function unknown	XP_020148107.1	inactive protein RESTRICTED TEV MOVEMENT 2 [Aegilops tauschii subsp. strangulata]	sp|D9UBX6|RTM2B_ARATH;	Inactive protein RESTRICTED TEV MOVEMENT 2 OS=Arabidopsis thaliana OX=3702 GN=RTM2 PE=3 SV=1;	PF00011.23	HSP20	Hsp20/alpha crystallin family
TraesCS1D02G058700	6.91	14.9783	4.36167	-	------	------	------	------	------	------	ENOG410Z0US	S:Function unknown	KAF6993351.1	hypothetical protein CFC21_010257 [Triticum aestivum]	------	------	PF03763.15	Remorin_C	Remorin, C-terminal region
TraesCS1B02G471800	4.94333	8.0025	3.38167	-	GO:001602	CC:integral component of membrane;	------	------	------	------	COG0071	O:Posttranslational modification, protein turnover, chaperones	KAF6992489.1	hypothetical protein CFC21_009473 [Triticum aestivum]	sp|Q9FHQ3|HS157_ARATH;	15.7 kDa heat shock protein, peroxisomal OS=Arabidopsis thaliana OX=3702 GN=HSP15.7 PE=2 SV=1;	PF00011.23	HSP20	Hsp20/alpha crystallin family
TraesCS1B02G393300	6.36833	6.8175	3.7725	Phospholipase D [Source:UniProtKB/TrEMBL;Acc:A0A1D5SEP9]	GO:0016042;GO:0046470;GO:0016020;GO:0003824;GO:0070290;GO:0005509;GO:000463	BP:lipid catabolic process;BP:phosphatidylcholine metabolic process;CC:membrane;MF:catalytic activity;MF:N-acylphosphatidylethanolamine-specific phospholipase D activity;MF:calcium ion binding;MF:phospholipase D activity;	K01115	PLD1_2	map00565;map00564;map04144	Ether lipid metabolism;Glycerophospholipid metabolism;Endocytosis	COG1502	I:Lipid transport and metabolism	KAF6991585.1	hypothetical protein CFC21_008657 [Triticum aestivum]	sp|Q43007|PLDA1_ORYSJ;	Phospholipase D alpha 1 OS=Oryza sativa subsp. japonica OX=39947 GN=PLD1 PE=1 SV=2;	PF12357.10;PF00614.24;PF00168.32;PF13091.8	PLD_C;PLDc;C2;PLDc_2	Phospholipase D C terminal;Phospholipase D Active site motif;C2 domain;PLD-like domain
TraesCS1B02G276200	87.2025	284.555	41.0733	-	GO:0010951;GO:0005576;GO:000486	BP:negative regulation of endopeptidase activity;CC:extracellular region;MF:serine-type endopeptidase inhibitor activity;	------	------	------	------	ENOG411070C	S:Function unknown	XP_037439381.1	uncharacterized protein LOC119307405 [Triticum dicoccoides]	------	------	------	------	------
TraesCS1B02G226000	6.32	8.4725	2.395	-	GO:0019953;GO:0005618;GO:0016020;GO:000557	BP:sexual reproduction;CC:cell wall;CC:membrane;CC:extracellular region;	------	------	------	------	ENOG41104H4	G:Carbohydrate transport and metabolism	VAH17996.1	unnamed protein product [Triticum turgidum subsp. durum]	sp|Q336T5|EXPB3_ORYSJ;	Expansin-B3 OS=Oryza sativa subsp. japonica OX=39947 GN=EXPB3 PE=2 SV=2;	PF01357.23;PF03330.20	Expansin_C;DPBB_1	Expansin C-terminal domain;Lytic transglycolase
TraesCS1B02G169200	3.62167	4.29083	1.95083	-	GO:0070646;GO:0008233;GO:0004523;GO:000367	BP:protein modification by small protein removal;MF:peptidase activity;MF:RNA-DNA hybrid ribonuclease activity;MF:nucleic acid binding;	K22762	DESI1, PPPDE2	------	------	ENOG4111H3Z	S:Function unknown	KAF6988989.1	hypothetical protein CFC21_006393 [Triticum aestivum]	sp|Q6ICB0|DESI1_HUMAN;	Desumoylating isopeptidase 1 OS=Homo sapiens OX=9606 GN=DESI1 PE=1 SV=1;	PF05903.16	Peptidase_C97	PPPDE putative peptidase domain
TraesCS1B02G155900	3.78583	4.90083	2.135	-	GO:001602	CC:integral component of membrane;	------	------	------	------	COG0071	O:Posttranslational modification, protein turnover, chaperones	KAF6988808.1	hypothetical protein CFC21_006254 [Triticum aestivum]	sp|D9UC01|RTM2D_ARATH;	Inactive protein RESTRICTED TEV MOVEMENT 2 OS=Arabidopsis thaliana OX=3702 GN=RTM2 PE=3 SV=1;	PF00011.23	HSP20	Hsp20/alpha crystallin family
TraesCS1B02G155800	6.31417	8.19	3.99583	-	GO:001602	CC:integral component of membrane;	------	------	------	------	COG0071;COG1357	O:Posttranslational modification, protein turnover, chaperones;S:Function unknown	XP_037460853.1	inactive protein RESTRICTED TEV MOVEMENT 2-like [Triticum dicoccoides]	sp|D9UBX6|RTM2B_ARATH;	Inactive protein RESTRICTED TEV MOVEMENT 2 OS=Arabidopsis thaliana OX=3702 GN=RTM2 PE=3 SV=1;	PF00011.23	HSP20	Hsp20/alpha crystallin family
TraesCS1B02G075600	10.035	20.2567	5.87	-	------	------	------	------	------	------	ENOG410Z0US	S:Function unknown	KAF6987795.1	hypothetical protein CFC21_005405 [Triticum aestivum]	------	------	PF03763.15	Remorin_C	Remorin, C-terminal region
TraesCS1A02G437300	4.55833	7.41333	2.96083	-	GO:001602	CC:integral component of membrane;	------	------	------	------	COG0071	O:Posttranslational modification, protein turnover, chaperones	KAF6986790.1	hypothetical protein CFC21_004510 [Triticum aestivum]	sp|Q9FHQ3|HS157_ARATH;	15.7 kDa heat shock protein, peroxisomal OS=Arabidopsis thaliana OX=3702 GN=HSP15.7 PE=2 SV=1;	PF00011.23	HSP20	Hsp20/alpha crystallin family
TraesCS1A02G265800	41.4933	87.8583	16.0125	-	GO:0010951;GO:0005576;GO:000486	BP:negative regulation of endopeptidase activity;CC:extracellular region;MF:serine-type endopeptidase inhibitor activity;	------	------	------	------	ENOG411070C	S:Function unknown	VAH19424.1	unnamed protein product [Triticum turgidum subsp. durum]	------	------	------	------	------
TraesCS1A02G241800	7.90083	14.9358	5.49833	-	GO:0071555;GO:0016021;GO:0000139;GO:001675	BP:cell wall organization;CC:integral component of membrane;CC:Golgi membrane;MF:transferase activity, transferring glycosyl groups;	K11714	RGXT	------	------	ENOG410YT39	S:Function unknown	VAH06957.1	unnamed protein product [Triticum turgidum subsp. durum]	------	------	------	------	------
TraesCS1A02G212400	6.93083	9.3775	3.165	-	GO:0019953;GO:0005618;GO:0016020;GO:000557	BP:sexual reproduction;CC:cell wall;CC:membrane;CC:extracellular region;	------	------	------	------	ENOG41104H4	G:Carbohydrate transport and metabolism	XP_037411936.1	expansin-B3-like [Triticum dicoccoides]	sp|Q336T5|EXPB3_ORYSJ;	Expansin-B3 OS=Oryza sativa subsp. japonica OX=39947 GN=EXPB3 PE=2 SV=2;	PF01357.23;PF03330.20	Expansin_C;DPBB_1	Expansin C-terminal domain;Lytic transglycolase
TraesCS1A02G137300	3.48917	6.13917	2.00833	-	GO:001602	CC:integral component of membrane;	------	------	------	------	COG0071;COG1357	O:Posttranslational modification, protein turnover, chaperones;S:Function unknown	KAF6983212.1	hypothetical protein CFC21_001461 [Triticum aestivum]	sp|D9UBX6|RTM2B_ARATH;	Inactive protein RESTRICTED TEV MOVEMENT 2 OS=Arabidopsis thaliana OX=3702 GN=RTM2 PE=3 SV=1;	PF00011.23	HSP20	Hsp20/alpha crystallin family
TraesCS1A02G104600	3.82667	5.7925	2.3725	-	GO:0009658;GO:0016021;GO:0009707;GO:0004523;GO:000367	BP:chloroplast organization;CC:integral component of membrane;CC:chloroplast outer membrane;MF:RNA-DNA hybrid ribonuclease activity;MF:nucleic acid binding;	------	------	------	------	ENOG41105MX	S:Function unknown	KAF6982815.1	hypothetical protein CFC21_001156 [Triticum aestivum]	------	------	------	------	------
TraesCS1A02G057900	5.88083	11.5958	3.2825	-	------	------	------	------	------	------	ENOG410Z0US	S:Function unknown	KAF6982231.1	hypothetical protein CFC21_000649 [Triticum aestivum]	------	------	PF03763.15	Remorin_C	Remorin, C-terminal region
ENSRNA050016232	27.3192	52.5492	9.86667	5.8S ribosomal RNA	------	------	------	------	------	------	ENOG4112AAH;ENOG4111JHC;ENOG410ZQPG	S:Function unknown;	KAE8805813.1	hypothetical protein D1007_18162 [Hordeum vulgare]	sp|Q8TGM5|ART3_YEAST;	Putative uncharacterized protein ART3 OS=Saccharomyces cerevisiae;	------	------	------

## Sheet: TableS3-4 MEred
Gene_id	CK	Al	Mn	Gene_description	GO_id	GO_term	KO_id	KO_name	Pathway_id	Pathway_definition	COG_id	COG_Functional Categories	NR_hit-name	NR_description	Swiss-Prot_hit-name	Swiss-Prot_description	Pfam_id	Domain	Domain description
TraesCSU02G198000	2.09417	7.80833	8.85083	Dirigent protein [Source:UniProtKB/TrEMBL;Acc:A0A341ZF53]	GO:0048046;GO:000557	CC:apoplast;CC:extracellular region;	------	------	------	------	ENOG410YZUA	S:Function unknown	XP_037438406.1	dirigent protein 22-like [Triticum dicoccoides]	sp|Q9C523|DIR19_ARATH;	Dirigent protein 19 OS=Arabidopsis thaliana OX=3702 GN=DIR19 PE=2 SV=1;	PF03018.16	Dirigent	Dirigent-like protein
TraesCSU02G131300	2.93333	16.9158	12.0492	-	GO:0019538;GO:0034605;GO:0009658;GO:0042026;GO:0009408;GO:0005737;GO:0009570;GO:0009507;GO:0016887;GO:000552	BP:protein metabolic process;BP:cellular response to heat;BP:chloroplast organization;BP:protein refolding;BP:response to heat;CC:cytoplasm;CC:chloroplast stroma;CC:chloroplast;MF:ATPase activity;MF:ATP binding;	K03695	clpB	------	------	COG0542	O:Posttranslational modification, protein turnover, chaperones	KAF7040435.1	hypothetical protein CFC21_050340 [Triticum aestivum]	sp|Q75GT3|CLPB2_ORYSJ;	Chaperone protein ClpB2, chloroplastic OS=Oryza sativa subsp. japonica OX=39947 GN=CLPB2 PE=2 SV=1;	PF07724.16;PF17871.3;PF02861.22;PF10431.11;PF00004.31;PF07728.16;PF13191.8;PF00158.28;PF05621.13	AAA_2;AAA_lid_9;Clp_N;ClpB_D2-small;AAA;AAA_5;AAA_16;Sigma54_activat;TniB	AAA domain;AAA lid domain;Clp amino terminal domain, pathogenicity island component;C-terminal, D2-small domain, of ClpB protein;ATPase family associated with various cellular activities;AAA domain;AAA ATPase domain;Sigma-54 interaction domain;Bacterial TniB protein
TraesCSU02G116400	1.47333	16.0592	12.3583	Heat shock 70 kDa protein 10, mitochondrial [Source:Projected from Arabidopsis thaliana (AT5G09590) UniProtKB/Swiss-Prot;Acc:Q9LDZ0]	GO:0006457;GO:0034620;GO:0051085;GO:0042026;GO:0005737;GO:0005774;GO:0005739;GO:0031072;GO:0044183;GO:0051082;GO:0051787;GO:0016887;GO:000552	BP:protein folding;BP:cellular response to unfolded protein;BP:chaperone mediated protein folding requiring cofactor;BP:protein refolding;CC:cytoplasm;CC:vacuolar membrane;CC:mitochondrion;MF:heat shock protein binding;MF:protein binding involved in protein folding;MF:unfolded protein binding;MF:misfolded protein binding;MF:ATPase activity;MF:ATP binding;	K04043	dnaK, HSPA9	map03018	RNA degradation	COG0443	O:Posttranslational modification, protein turnover, chaperones	XP_020177409.1	heat shock 70 kDa protein, mitochondrial [Aegilops tauschii subsp. strangulata]	sp|Q01899|HSP7M_PHAVU;	Heat shock 70 kDa protein, mitochondrial OS=Phaseolus vulgaris OX=3885 PE=2 SV=1;	PF00012.22;PF06723.15;PF02782.18	HSP70;MreB_Mbl;FGGY_C	Hsp70 protein;MreB/Mbl protein;FGGY family of carbohydrate kinases, C-terminal domain
TraesCSU02G072800	3.93917	11.5642	8.37	Patatin [Source:UniProtKB/TrEMBL;Acc:A0A341ZKY4]	GO:0006629;GO:0016042;GO:001678	BP:lipid metabolic process;BP:lipid catabolic process;MF:hydrolase activity;	------	------	------	------	COG3621	S:Function unknown	KAF7067522.1	hypothetical protein CFC21_073409 [Triticum aestivum]	sp|B8B7E7|PLP3_ORYSI;	Patatin-like protein 3 OS=Oryza sativa subsp. indica OX=39946 GN=PLP3 PE=3 SV=1;	PF01734.24	Patatin	Patatin-like phospholipase
TraesCSU02G009100	2.61083	5.00917	4.47833	-	GO:0016021;GO:0016705;GO:0004497;GO:0005506;GO:002003	CC:integral component of membrane;MF:oxidoreductase activity, acting on paired donors, with incorporation or reduction of molecular oxygen;MF:monooxygenase activity;MF:iron ion binding;MF:heme binding;	K16085	CYP99A2_3	map00904	Diterpenoid biosynthesis	COG2124	Q:Secondary metabolites biosynthesis, transport and catabolism	KAF6998486.1	hypothetical protein CFC21_014603 [Triticum aestivum]	sp|Q7X7X4|C99A2_ORYSJ;	Cytochrome P450 99A2 OS=Oryza sativa subsp. japonica OX=39947 GN=CYP99A2 PE=2 SV=2;	PF00067.24	p450	Cytochrome P450
TraesCSU02G002700	2.45417	3.62083	3.53083	-	GO:0098719;GO:0071805;GO:0006812;GO:0006814;GO:0051453;GO:0055085;GO:0009941;GO:0016021;GO:0005886;GO:0015299;GO:0015386;GO:001538	BP:sodium ion import across plasma membrane;BP:potassium ion transmembrane transport;BP:cation transport;BP:sodium ion transport;BP:regulation of intracellular pH;BP:transmembrane transport;CC:chloroplast envelope;CC:integral component of membrane;CC:plasma membrane;MF:solut;MF:potassiu;MF:sodiu;	------	------	------	------	COG0025	P:Inorganic ion transport and metabolism	KAF6987417.1	hypothetical protein CFC21_005066 [Triticum aestivum]	sp|Q9LKW9|NHX7_ARATH;	Sodium/hydrogen exchanger 7 OS=Arabidopsis thaliana OX=3702 GN=NHX7 PE=1 SV=1;	PF00999.23;PF00027.31	Na_H_Exchanger;cNMP_binding	Sodium/hydrogen exchanger family;Cyclic nucleotide-binding domain
TraesCS7D02G554400	4.895	11.7025	9.2825	-	GO:001602	CC:integral component of membrane;	------	------	------	------	ENOG41121N2;ENOG411057G	O:Posttranslational modification, protein turnover, chaperones;S:Function unknown	KAF7112121.1	hypothetical protein CFC21_112057 [Triticum aestivum]	sp|O22755|ATL44_ARATH;	Probable E3 ubiquitin-protein ligase ATL44 OS=Arabidopsis thaliana OX=3702 GN=ATL44 PE=1 SV=1;	PF13639.8;PF17123.7;PF12678.9;PF13923.8;PF00097.27;PF11793.10;PF14634.8;PF13920.8;PF13445.8	zf-RING_2;zf-RING_11;zf-rbx1;zf-C3HC4_2;zf-C3HC4;FANCL_C;zf-RING_5;zf-C3HC4_3;zf-RING_UBOX	Ring finger domain;RING-like zinc finger;RING-H2 zinc finger domain;Zinc finger, C3HC4 type;Zinc finger, C3HC4 type;FANCL C-terminal domain;zinc-RING finger domain;Zinc finger, C3HC4 type;RING-type zinc-finger
TraesCS7D02G512800	1.66083	5.14167	3.49333	-	GO:0016021;GO:0004497;GO:0016705;GO:0005506;GO:002003	CC:integral component of membrane;MF:monooxygenase activity;MF:oxidoreductase activity, acting on paired donors, with incorporation or reduction of molecular oxygen;MF:iron ion binding;MF:heme binding;	------	------	------	------	COG2124	Q:Secondary metabolites biosynthesis, transport and catabolism	KAF7111634.1	hypothetical protein CFC21_111621 [Triticum aestivum]	sp|Q9LUC6|C7A14_ARATH;	Cytochrome P450 72A14 OS=Arabidopsis thaliana OX=3702 GN=CYP72A14 PE=2 SV=1;	PF00067.24	p450	Cytochrome P450
TraesCS7D02G494900	3.03583	6.18917	5.2625	-	------	------	------	------	------	------	COG0484	O:Posttranslational modification, protein turnover, chaperones	KAF7111423.1	hypothetical protein CFC21_111437 [Triticum aestivum]	sp|Q8VCE1|DJC28_MOUSE;	DnaJ homolog subfamily C member 28 OS=Mus musculus OX=10090 GN=Dnajc28 PE=1 SV=2;	PF00226.33	DnaJ	DnaJ domain
TraesCS7D02G494800	1.68833	4.48083	4.96667	-	------	------	------	------	------	------	COG0484	O:Posttranslational modification, protein turnover, chaperones	KAF7111422.1	hypothetical protein CFC21_111436 [Triticum aestivum]	sp|P78004|DNAJ_MYCPN;	Chaperone protein DnaJ OS=Mycoplasma pneumoniae;	PF00226.33	DnaJ	DnaJ domain
TraesCS7D02G479500	1.40167	5.00917	4.2375	-	GO:001602	CC:integral component of membrane;	------	------	------	------	ENOG410YKF5	S:Function unknown	KAF7111274.1	hypothetical protein CFC21_111300 [Triticum aestivum]	sp|Q9STW3|DMP3_ARATH;	Protein DMP3 OS=Arabidopsis thaliana OX=3702 GN=DMP3 PE=2 SV=1;	PF05078.14	DUF679	Protein of unknown function
TraesCS7D02G464800	4.35167	10.23	10.4983	Probable ubiquitin conjugation factor E4 [Source:Projected from Arabidopsis thaliana (AT5G15400) UniProtKB/Swiss-Prot;Acc:Q9LF41]	GO:0016567;GO:0006511;GO:0030433;GO:0000209;GO:0005737;GO:0005829;GO:0000151;GO:0005634;GO:0034450;GO:000484	BP:protein ubiquitination;BP:ubiquitin-dependent protein catabolic process;BP:ER-associated ubiquitin-dependent protein catabolic process;BP:protein polyubiquitination;CC:cytoplasm;CC:cytosol;CC:ubiquitin ligase complex;CC:nucleus;MF:ubiquitin-ubiquitin ligase activity;MF:ubiquitin-protein transferase activity;	K10597	UBE4B, UFD2	map04120;map04141	Ubiquitin mediated proteolysis;Protein processing in endoplasmic reticulum	COG5113	O:Posttranslational modification, protein turnover, chaperones	XP_020196631.1	probable ubiquitin conjugation factor E4 [Aegilops tauschii subsp. strangulata]	sp|Q9LF41|UBE4_ARATH;	Probable ubiquitin conjugation factor E4 OS=Arabidopsis thaliana OX=3702 GN=PUB1 PE=2 SV=1;	PF10408.11;PF04564.17	Ufd2P_core;U-box	Ubiquitin elongating factor core;U-box domain
TraesCS7D02G440200	9.49167	52.0242	56.9342	HSA32 [Source:Projected from Arabidopsis thaliana (AT4G21320) UniProtKB/TrEMBL;Acc:A0A178UV51]	GO:0010286;GO:0010608;GO:000382	BP:heat acclimation;BP:posttranscriptional regulation of gene expression;MF:catalytic activity;	------	------	------	------	COG1809	S:Function unknown	XP_020157434.1	protein HEAT-STRESS-ASSOCIATED 32 [Aegilops tauschii subsp. strangulata]	sp|Q8GWL1|HSA32_ARATH;	Protein HEAT-STRESS-ASSOCIATED 32 OS=Arabidopsis thaliana OX=3702 GN=HSA32 PE=2 SV=1;	PF02679.17	ComA
TraesCS7D02G419900	18.1317	45.2908	36.3525	Xyloglucan endotransglucosylase/hydrolase [Source:UniProtKB/TrEMBL;Acc:A0A1D6CKY4]	GO:0042546;GO:0005975;GO:0006073;GO:0071555;GO:0008152;GO:0010411;GO:0005618;GO:0048046;GO:0005576;GO:0016787;GO:0016798;GO:0016762;GO:0016740;GO:000455	BP:cell wall biogenesis;BP:carbohydrate metabolic process;BP:cellular glucan metabolic process;BP:cell wall organization;BP:metabolic process;BP:xyloglucan metabolic process;CC:cell wall;CC:apoplast;CC:extracellular region;MF:hydrolase activity;MF:hydrolase activity, acting on glycosyl bonds;MF:xylogluca;MF:transferase activity;MF:hydrolase activity, hydrolyzing O-glycosyl compounds;	K14504;K08235	TCH4;E2.4.1.207	map04075	Plant hormone signal transduction	COG2273	G:Carbohydrate transport and metabolism	XP_020147019.1	probable xyloglucan endotransglucosylase/hydrolase protein 23 isoform X1 [Aegilops tauschii subsp. strangulata]	sp|Q38910|XTH23_ARATH;	Probable xyloglucan endotransglucosylase/hydrolase protein 23 OS=Arabidopsis thaliana OX=3702 GN=XTH23 PE=2 SV=1;	PF00722.23;PF06955.14	Glyco_hydro_16;XET_C	Glycosyl hydrolases family 16;Xyloglucan endo-transglycosylase
TraesCS7D02G417000	2.93333	7.42667	5.23	Exocyst subunit Exo70 family protein [Source:UniProtKB/TrEMBL;Acc:A0A1D6CNS2]	GO:0015031;GO:0006887;GO:000014	BP:protein transport;BP:exocytosis;CC:exocyst;	K07195	EXOC7, EXO70	------	------	ENOG410YIGI	S:Function unknown	XP_020193067.1	exocyst complex component EXO70A1 [Aegilops tauschii subsp. strangulata]	sp|Q9LZD3|E70A1_ARATH;	Exocyst complex component EXO70A1 OS=Arabidopsis thaliana OX=3702 GN=EXO70A1 PE=1 SV=1;	PF03081.17	Exo70	Exo70 exocyst complex subunit
TraesCS7D02G386600	2.89667	10.8433	8.5675	-	GO:0016021;GO:0016020;GO:0042626;GO:0140359;GO:0016887;GO:000552	CC:integral component of membrane;CC:membrane;MF:ATPase activity, coupled to transmembrane movement of substances;MF:ABC-type transmembrane transporter activity;MF:ATPase activity;MF:ATP binding;	------	------	------	------	COG0842	V:Defense mechanisms	KAF7110196.1	hypothetical protein CFC21_110338 [Triticum aestivum]	sp|Q6YW62|AB44G_ORYSJ;	ABC transporter G family member 44 OS=Oryza sativa subsp. japonica OX=39947 GN=ABCG44 PE=2 SV=2;	PF01061.26;PF00005.29;PF08370.13;PF19055.2;PF13304.8;PF14510.8;PF13191.8;PF13555.8;PF00004.31;PF13481.8	ABC2_membrane;ABC_tran;PDR_assoc;ABC2_membrane_7;AAA_21;ABC_trans_N;AAA_16;AAA_29;AAA;AAA_25	ABC-2 type transporter;ABC transporter;Plant PDR ABC transporter associated;ABC-2 type transporter;AAA domain, putative AbiEii toxin, Type IV TA system;ABC-transporter N-terminal;AAA ATPase domain;P-loop containing region of AAA domain;ATPase family associated with various cellular activities;AAA domain
TraesCS7D02G386500	12.1433	35.2667	28.2658	-	GO:0016021;GO:0016020;GO:0042626;GO:0140359;GO:0016887;GO:000552	CC:integral component of membrane;CC:membrane;MF:ATPase activity, coupled to transmembrane movement of substances;MF:ABC-type transmembrane transporter activity;MF:ATPase activity;MF:ATP binding;	------	------	------	------	COG0842	V:Defense mechanisms	KAF7110195.1	hypothetical protein CFC21_110337 [Triticum aestivum]	sp|Q6YW62|AB44G_ORYSJ;	ABC transporter G family member 44 OS=Oryza sativa subsp. japonica OX=39947 GN=ABCG44 PE=2 SV=2;	PF01061.26;PF00005.29;PF08370.13;PF19055.2;PF13304.8;PF14510.8;PF13191.8;PF13555.8;PF00004.31;PF13481.8	ABC2_membrane;ABC_tran;PDR_assoc;ABC2_membrane_7;AAA_21;ABC_trans_N;AAA_16;AAA_29;AAA;AAA_25	ABC-2 type transporter;ABC transporter;Plant PDR ABC transporter associated;ABC-2 type transporter;AAA domain, putative AbiEii toxin, Type IV TA system;ABC-transporter N-terminal;AAA ATPase domain;P-loop containing region of AAA domain;ATPase family associated with various cellular activities;AAA domain
TraesCS7D02G363600	3.515	9.95083	6.985	O-acyltransferase [Source:UniProtKB/TrEMBL;Acc:A0A341ZDU9]	GO:0019432;GO:0006071;GO:0009941;GO:0016021;GO:0005789;GO:0008374;GO:000414	BP:triglyceride biosynthetic process;BP:glycerol metabolic process;CC:chloroplast envelope;CC:integral component of membrane;CC:endoplasmic reticulum membrane;MF:O-acyltransferase activity;MF:diacylglycerol O-acyltransferase activity;	K11155	DGAT1	map00561	Glycerolipid metabolism	COG5056	I:Lipid transport and metabolism	XP_020179435.1	diacylglycerol O-acyltransferase 1-2 [Aegilops tauschii subsp. strangulata]	sp|A0A0P0WY03|DAT12_ORYSJ;	Diacylglycerol O-acyltransferase 1-2 OS=Oryza sativa subsp. japonica OX=39947 GN=DGAT1-2 PE=3 SV=1;	PF03062.21;PF13813.8	MBOAT;MBOAT_2	MBOAT, membrane-bound O-acyltransferase family;Membrane bound O-acyl transferase family
TraesCS7D02G353800	7.81083	91.4617	72.835	MBF1C [Source:Projected from Arabidopsis thaliana (AT3G24500) UniProtKB/TrEMBL;Acc:A0A178VDH9]	GO:0009737;GO:0009414;GO:0009408;GO:0005730;GO:0005634;GO:0043565;GO:0003713;GO:000367	BP:response to abscisic acid;BP:response to water deprivation;BP:response to heat;CC:nucleolus;CC:nucleus;MF:sequence-specific DNA binding;MF:transcription coactivator activity;MF:DNA binding;	K03627	MBF1	------	------	COG1813	K:Transcription	XP_020198792.1	multiprotein-bridging factor 1c [Aegilops tauschii subsp. strangulata]	sp|Q9LV58|MBF1C_ARATH;	Multiprotein-bridging factor 1c OS=Arabidopsis thaliana OX=3702 GN=MBF1C PE=1 SV=1;	PF08523.12;PF01381.24;PF13560.8	MBF1;HTH_3;HTH_31	Multiprotein bridging factor 1;Helix-turn-helix;Helix-turn-helix domain
TraesCS7D02G345700	2.115	4.06417	5.37333	WRKY transcription factor 146 [Source:UniProtKB/TrEMBL;Acc:A0A1D6CKW7]	GO:0006355;GO:0050896;GO:0005634;GO:0043565;GO:0003700;GO:000367	BP:regulation of transcription, DNA-templated;BP:response to stimulus;CC:nucleus;MF:sequence-specific DNA binding;MF:transcription factor activity, sequence-specific DNA binding;MF:DNA binding;	------	------	------	------	ENOG410YZZY	K:Transcription	AUG68740.1	WRKY transcription factor 146 [Triticum aestivum]	sp|Q9SKD9|WRK46_ARATH;	Probable WRKY transcription factor 46 OS=Arabidopsis thaliana OX=3702 GN=WRKY46 PE=1 SV=1;	PF03106.17	WRKY	WRKY DNA -binding domain
TraesCS7D02G329300	5.81917	9.9	9.9625	-	------	------	------	------	------	------	ENOG41106VX;ENOG41108QF;ENOG41108A0	S:Function unknown;	XP_037467846.1	uncharacterized protein LOC119340034 [Triticum dicoccoides]	------	------	PF05678.16	VQ	VQ motif
TraesCS7D02G319900	1.8975	13.9925	6.81417	-	GO:000485	MF:enzyme inhibitor activity;	------	------	------	------	ENOG410YWNR	S:Function unknown	XP_020176081.1	pectinesterase inhibitor 28 [Aegilops tauschii subsp. strangulata]	sp|Q0J8J8|PMI28_ORYSJ;	Pectinesterase inhibitor 28 OS=Oryza sativa subsp. japonica OX=39947 GN=PMEI28 PE=2 SV=1;	PF04043.17	PMEI	Plant invertase/pectin methylesterase inhibitor
TraesCS7D02G270600	0.764167	10.2908	8.3625	-	GO:0006355;GO:0005634;GO:0003700;GO:004356	BP:regulation of transcription, DNA-templated;CC:nucleus;MF:transcription factor activity, sequence-specific DNA binding;MF:sequence-specific DNA binding;	K09419	HSFF	------	------	COG5169	K:Transcription	XP_040251789.1	heat stress transcription factor B-2b, partial [Aegilops tauschii subsp. strangulata]	sp|Q6Z9C8|HFB2B_ORYSJ;	Heat stress transcription factor B-2b OS=Oryza sativa subsp. japonica OX=39947 GN=HSFB2B PE=2 SV=1;	PF00447.19	HSF_DNA-bind	HSF-type DNA-binding
TraesCS7D02G241200	1.98083	4.79833	3.8675	Sodium/hydrogen exchanger [Source:UniProtKB/TrEMBL;Acc:A0A1D6D1Q2]	GO:0006812;GO:0006814;GO:0006885;GO:0055085;GO:0016021;GO:0015299;GO:001538	BP:cation transport;BP:sodium ion transport;BP:regulation of pH;BP:transmembrane transport;CC:integral component of membrane;MF:solut;MF:sodiu;	K14724	SLC9A8, NHE8	------	------	COG0025	P:Inorganic ion transport and metabolism	XP_020157519.2	sodium/hydrogen exchanger 6 isoform X2 [Aegilops tauschii subsp. strangulata]	sp|Q8RWU6|NHX6_ARATH;	Sodium/hydrogen exchanger 6 OS=Arabidopsis thaliana OX=3702 GN=NHX6 PE=1 SV=3;	PF00999.23	Na_H_Exchanger	Sodium/hydrogen exchanger family
TraesCS7D02G241100	26.9825	266.637	378.365	Heat shock protein 90 [Source:UniProtKB/TrEMBL;Acc:F4Y594]	GO:0006457;GO:0050821;GO:0034605;GO:0005829;GO:0005886;GO:0032991;GO:0048471;GO:0051082;GO:0000166;GO:0016887;GO:000552	BP:protein folding;BP:protein stabilization;BP:cellular response to heat;CC:cytosol;CC:plasma membrane;CC:macromolecular complex;CC:perinuclear region of cytoplasm;MF:unfolded protein binding;MF:nucleotide binding;MF:ATPase activity;MF:ATP binding;	K04079	HSP90A, htpG	map04626;map04141	Plant-pathogen interaction;Protein processing in endoplasmic reticulum	COG0326	O:Posttranslational modification, protein turnover, chaperones	XP_020157515.1	heat shock protein 81-1 [Aegilops tauschii subsp. strangulata]	sp|A2YWQ1|HSP81_ORYSI;	Heat shock protein 81-1 OS=Oryza sativa subsp. indica OX=39946 GN=HSP81-1 PE=2 SV=1;	PF00183.20;PF02518.28;PF13589.8	HSP90;HATPase_c;HATPase_c_3	Hsp90 protein;Histidine kinase-, DNA gyrase B-, and HSP90-like ATPase;Histidine kinase-, DNA gyrase B-, and HSP90-like ATPase
TraesCS7D02G232600	10.7167	211.458	206.702	-	------	------	K13993	HSP20	map04141	Protein processing in endoplasmic reticulum	------	------	XP_020180004.1	26.2 kDa heat shock protein, mitochondrial [Aegilops tauschii subsp. strangulata]	sp|Q67X83|HS26M_ORYSJ;	26.2 kDa heat shock protein, mitochondrial OS=Oryza sativa subsp. japonica OX=39947 GN=HSP26.2 PE=2 SV=1;	PF00011.23;PF17886.3	HSP20;ArsA_HSP20	Hsp20/alpha crystallin family;HSP20-like domain found in ArsA
TraesCS7D02G219400	2.75833	4.175	7.4875	-	GO:001602	CC:integral component of membrane;	------	------	------	------	COG0666	S:Function unknown	KAF7108056.1	hypothetical protein CFC21_108604 [Triticum aestivum]	------	------	PF13962.8	PGG	Domain of unknown function
TraesCS7D02G208400	2.2	7.22833	3.74583	-	GO:000588	CC:plasma membrane;	------	------	------	------	ENOG41119KI	S:Function unknown	XP_020161420.1	uncharacterized protein At1g66480 [Aegilops tauschii subsp. strangulata]	sp|Q6NLC8|Y1648_ARATH;	Uncharacterized protein At1g66480 OS=Arabidopsis thaliana OX=3702 GN=At1g66480 PE=2 SV=1;	PF14009.8	PADRE	PADRE domain
TraesCS7D02G203200	4.47417	4.565	5.81167	-	GO:0006813;GO:0006811;GO:0055085;GO:0034765;GO:0016021;GO:0016020;GO:0005249;GO:0005515;GO:000521	BP:potassium ion transport;BP:ion transport;BP:transmembrane transport;BP:regulation of ion transmembrane transport;CC:integral component of membrane;CC:membrane;MF:voltage-gated potassium channel activity;MF:protein binding;MF:ion channel activity;	K21867	AKT, KAT, GORK, SKOR	------	------	ENOG410XPSE	U:Intracellular trafficking, secretion, and vesicular transport	XP_020146340.1	potassium channel KOR1 [Aegilops tauschii subsp. strangulata]	sp|Q653P0|KOR1_ORYSJ;	Potassium channel KOR1 OS=Oryza sativa subsp. japonica OX=39947 GN=Os06g0250600 PE=2 SV=1;	PF00520.33;PF11834.10;PF12796.9;PF13637.8;PF13857.8;PF00027.31;PF00023.32;PF13606.8;PF07885.18	Ion_trans;KHA;Ank_2;Ank_4;Ank_5;cNMP_binding;Ank;Ank_3;Ion_trans_2	Ion transport protein;KHA, dimerisation domain of potassium ion channel;Ankyrin repeats;Ankyrin repeats;Ankyrin repeats;Cyclic nucleotide-binding domain;Ankyrin repeat;Ankyrin repeat;Ion channel
TraesCS7D02G186100	9.87	19.59	20.1058	-	GO:0008652;GO:0009423;GO:0009073;GO:0019632;GO:0009536;GO:0009507;GO:0004765;GO:0046872;GO:000552	BP:cellular amino acid biosynthetic process;BP:chorismate biosynthetic process;BP:aromatic amino acid family biosynthetic process;BP:shikimate metabolic process;CC:plastid;CC:chloroplast;MF:shikimate kinase activity;MF:metal ion binding;MF:ATP binding;	K00891	aroK, aroL	map00400	Phenylalanine, tyrosine and tryptophan biosynthesis	COG0703	E:Amino acid transport and metabolism	XP_020198259.1	shikimate kinase 2, chloroplastic [Aegilops tauschii subsp. strangulata]	sp|Q5NTH3|SK2_ORYSJ;	Shikimate kinase 2, chloroplastic OS=Oryza sativa subsp. japonica OX=39947 GN=SK2 PE=1 SV=1;	PF01202.24;PF13238.8;PF13189.8;PF13671.8;PF02224.20	SKI;AAA_18;Cytidylate_kin2;AAA_33;Cytidylate_kin	Shikimate kinase;AAA domain;Cytidylate kinase-like family;AAA domain;Cytidylate kinase
TraesCS7D02G180600	17.4983	42.2817	38.79	-	GO:000561	CC:extracellular space;	------	------	------	------	ENOG41107QF;ENOG41106HT	S:Function unknown;	XP_020153553.1	protein PHOSPHATE-INDUCED 1 [Aegilops tauschii subsp. strangulata]	sp|O82161|PHI1_TOBAC;	Protein PHOSPHATE-INDUCED 1 OS=Nicotiana tabacum OX=4097 GN=PHI-1 PE=2 SV=1;	PF04674.14	Phi_1	Phosphate-induced protein 1 conserved region
TraesCS7D02G179600	2.12333	30.3	25.4225	-	------	------	K13993	HSP20	map04141	Protein processing in endoplasmic reticulum	------	------	KAF7107598.1	hypothetical protein CFC21_108205 [Triticum aestivum]	sp|Q67X83|HS26M_ORYSJ;	26.2 kDa heat shock protein, mitochondrial OS=Oryza sativa subsp. japonica OX=39947 GN=HSP26.2 PE=2 SV=1;	PF00011.23;PF17886.3	HSP20;ArsA_HSP20	Hsp20/alpha crystallin family;HSP20-like domain found in ArsA
TraesCS7D02G179200	0.831667	8.66417	11.6983	-	------	------	K13993	HSP20	map04141	Protein processing in endoplasmic reticulum	------	------	KAF7107594.1	hypothetical protein CFC21_108201 [Triticum aestivum]	sp|Q6Z7V2|HS24M_ORYSJ;	24.1 kDa heat shock protein, mitochondrial OS=Oryza sativa subsp. japonica OX=39947 GN=HSP24.1 PE=2 SV=1;	PF00011.23;PF17886.3	HSP20;ArsA_HSP20	Hsp20/alpha crystallin family;HSP20-like domain found in ArsA
TraesCS7D02G174100	2.5725	5.12167	3.95167	-	GO:0006355;GO:0005634;GO:0003700;GO:004356	BP:regulation of transcription, DNA-templated;CC:nucleus;MF:transcription factor activity, sequence-specific DNA binding;MF:sequence-specific DNA binding;	------	------	------	------	ENOG411066Z	S:Function unknown	XP_020161470.1	scarecrow-like protein 34 [Aegilops tauschii subsp. strangulata]	sp|O80933|SCL9_ARATH;	Scarecrow-like protein 9 OS=Arabidopsis thaliana OX=3702 GN=SCL9 PE=2 SV=1;	PF03514.16	GRAS	GRAS domain family
TraesCS7D02G169100	3.79667	4.91417	3.56	-	------	------	------	------	------	------	ENOG41108TZ;ENOG41108HP	S:Function unknown;	XP_020169317.1	uncharacterized protein LOC109754835 [Aegilops tauschii subsp. strangulata]	------	------	------	------	------
TraesCS7D02G168600	1.11583	7.24333	5.85667	-	GO:0009187;GO:0004112;GO:000411	BP:cyclic nucleotide metabolic process;MF:cyclic-nucleotide phosphodiesterase activity;MF:2',3'-cyclic-nucleotide 3'-phosphodiesterase activity;	------	------	------	------	ENOG41128FD	S:Function unknown	XP_020151603.1	cyclic phosphodiesterase [Aegilops tauschii subsp. strangulata]	sp|O04147|CPD_ARATH;	Cyclic phosphodiesterase OS=Arabidopsis thaliana OX=3702 GN=At4g18930 PE=1 SV=1;	PF13563.8;PF07823.13	2_5_RNA_ligase2;CPDase	2'-5' RNA ligase superfamily;Cyclic phosphodiesterase-like protein
TraesCS7D02G160400	11.1233	65.0525	58.645	-	------	------	------	------	------	------	COG0484;COG2214	O:Posttranslational modification, protein turnover, chaperones;	KAF7107371.1	hypothetical protein CFC21_108002 [Triticum aestivum]	sp|A9BNG6|DNAJ_DELAS;	Chaperone protein DnaJ OS=Delftia acidovorans;	PF00226.33	DnaJ	DnaJ domain
TraesCS7D02G159500	3.12833	10.64	5.91917	-	------	------	------	------	------	------	------	------	KAF7107356.1	hypothetical protein CFC21_107994 [Triticum aestivum]	------	------	------	------	------
TraesCS7D02G127600	8.48417	19.4275	14.0483	-	GO:0006355;GO:0006351;GO:0005634;GO:0003700;GO:000367	BP:regulation of transcription, DNA-templated;BP:transcription, DNA-templated;CC:nucleus;MF:transcription factor activity, sequence-specific DNA binding;MF:DNA binding;	K09286	EREBP	------	------	ENOG410YR77;ENOG41116MV	K:Transcription;	KAF7106959.1	hypothetical protein CFC21_107660 [Triticum aestivum]	sp|Q8W3M3|RAP29_ARATH;	Ethylene-responsive transcription factor RAP2-9 OS=Arabidopsis thaliana OX=3702 GN=RAP2-9 PE=2 SV=1;	PF00847.22	AP2	AP2 domain
TraesCS7D02G122600	4.995	12.2367	8.66833	Glutamyl-tRNA reductase [Source:UniProtKB/TrEMBL;Acc:A0A1D6D2G5]	GO:0015995;GO:0006782;GO:0033014;GO:0009507;GO:0050661;GO:000888	BP:chlorophyll biosynthetic process;BP:protoporphyrinogen IX biosynthetic process;BP:tetrapyrrole biosynthetic process;CC:chloroplast;MF:NADP binding;MF:glutamyl-tRNA reductase activity;	K02492	hemA	map00860;map01240	Porphyrin and chlorophyll metabolism;Biosynthesis of cofactors	COG0373	H:Coenzyme transport and metabolism	KAF7106901.1	hypothetical protein CFC21_107603 [Triticum aestivum]	sp|O65796|HEM13_HORVU;	Glutamyl-tRNA reductase 3, chloroplastic OS=Hordeum vulgare OX=4513 GN=HEMA3 PE=2 SV=1;	PF05201.17;PF01488.22;PF00745.22;PF03807.19;PF03446.17;PF13460.8;PF03435.20;PF02423.17;PF02254.20;PF02558.18;PF02826.21;PF03721.16	GlutR_N;Shikimate_DH;GlutR_dimer;F420_oxidored;NAD_binding_2;NAD_binding_10;Sacchrp_dh_NADP;OCD_Mu_crystall;TrkA_N;ApbA;2-Hacid_dh_C;UDPG_MGDP_dh_N	Glutamyl-tRNAGlu reductase, N-terminal domain;Shikimate / quinate 5-dehydrogenase;Glutamyl-tRNAGlu reductase, dimerisation domain;NADP oxidoreductase coenzyme F420-dependent;NAD binding domain of 6-phosphogluconate dehydrogenase;NA;Saccharopine dehydrogenase NADP binding domain;Ornithine cyclodeaminase/mu-crystallin family;TrkA-N domain;Ketopantoate reductase PanE/ApbA;D-isomer specific 2-hydroxy…
TraesCS7D02G068800	6.65833	40.3642	28.4058	-	GO:000573	CC:cytoplasm;	------	------	------	------	ENOG410XTYY	S:Function unknown	XP_020167152.1	collagen alpha-1(III) chain [Aegilops tauschii subsp. strangulata]	------	------	PF10248.11	Mlf1IP	Myelodysplasia-myeloid leukemia factor 1-interacting protein
TraesCS7D02G055600	3.365	8.57167	8.6875	-	------	------	------	------	------	------	ENOG410ZAK5	S:Function unknown	XP_020164028.1	uncharacterized protein LOC109749478 [Aegilops tauschii subsp. strangulata]	------	------	------	------	------
TraesCS7B02G449400	7.41333	17.8025	20.9167	-	------	------	------	------	------	------	------	------	KAF7104836.1	hypothetical protein CFC21_105704 [Triticum aestivum]	------	------	------	------	------
TraesCS7B02G388700	0.196667	14.1575	11.4925	-	GO:0051087;GO:000551	MF:chaperone binding;MF:protein binding;	------	------	------	------	ENOG410Z1AE	S:Function unknown	KAF7104150.1	hypothetical protein CFC21_105071 [Triticum aestivum]	sp|O82345|BAG6_ARATH;	BAG family molecular chaperone regulator 6 OS=Arabidopsis thaliana OX=3702 GN=BAG6 PE=1 SV=1;	PF02179.18;PF00612.29	BAG;IQ	BAG domain;IQ calmodulin-binding motif
TraesCS7B02G378900	4.83833	10.3033	10.6667	Probable ubiquitin conjugation factor E4 [Source:Projected from Arabidopsis thaliana (AT5G15400) UniProtKB/Swiss-Prot;Acc:Q9LF41]	GO:0016567;GO:0006511;GO:0030433;GO:0000209;GO:0005737;GO:0005829;GO:0000151;GO:0005634;GO:0034450;GO:000484	BP:protein ubiquitination;BP:ubiquitin-dependent protein catabolic process;BP:ER-associated ubiquitin-dependent protein catabolic process;BP:protein polyubiquitination;CC:cytoplasm;CC:cytosol;CC:ubiquitin ligase complex;CC:nucleus;MF:ubiquitin-ubiquitin ligase activity;MF:ubiquitin-protein transferase activity;	K10597	UBE4B, UFD2	map04120;map04141	Ubiquitin mediated proteolysis;Protein processing in endoplasmic reticulum	COG5113	O:Posttranslational modification, protein turnover, chaperones	KAF7104030.1	hypothetical protein CFC21_104959 [Triticum aestivum]	sp|Q9LF41|UBE4_ARATH;	Probable ubiquitin conjugation factor E4 OS=Arabidopsis thaliana OX=3702 GN=PUB1 PE=2 SV=1;	PF10408.11;PF04564.17	Ufd2P_core;U-box	Ubiquitin elongating factor core;U-box domain
TraesCS7B02G351000	11.5508	65.805	68.5092	HSA32 [Source:Projected from Arabidopsis thaliana (AT4G21320) UniProtKB/TrEMBL;Acc:A0A178UV51]	GO:0010286;GO:0010608;GO:000382	BP:heat acclimation;BP:posttranscriptional regulation of gene expression;MF:catalytic activity;	------	------	------	------	COG1809	S:Function unknown	XP_037465753.1	protein HEAT-STRESS-ASSOCIATED 32-like [Triticum dicoccoides]	sp|Q8GWL1|HSA32_ARATH;	Protein HEAT-STRESS-ASSOCIATED 32 OS=Arabidopsis thaliana OX=3702 GN=HSA32 PE=2 SV=1;	PF02679.17	ComA
TraesCS7B02G347100	0.738333	109.862	89.3717	-	------	------	K13993	HSP20	map04141	Protein processing in endoplasmic reticulum	COG0071	O:Posttranslational modification, protein turnover, chaperones	XP_037466308.1	17.5 kDa class II heat shock protein-like [Triticum dicoccoides]	sp|P24631|HSP21_MAIZE;	17.5 kDa class II heat shock protein OS=Zea mays OX=4577 PE=2 SV=1;	PF00011.23;PF17886.3	HSP20;ArsA_HSP20	Hsp20/alpha crystallin family;HSP20-like domain found in ArsA
TraesCS7B02G327700	20.6342	36.0033	33.8258	Xyloglucan endotransglucosylase/hydrolase [Source:UniProtKB/TrEMBL;Acc:A0A1D6C2J5]	GO:0042546;GO:0005975;GO:0006073;GO:0071555;GO:0010411;GO:0005618;GO:0048046;GO:0016762;GO:000455	BP:cell wall biogenesis;BP:carbohydrate metabolic process;BP:cellular glucan metabolic process;BP:cell wall organization;BP:xyloglucan metabolic process;CC:cell wall;CC:apoplast;MF:xylogluca;MF:hydrolase activity, hydrolyzing O-glycosyl compounds;	K14504;K08235	TCH4;E2.4.1.207	map04075	Plant hormone signal transduction	COG2273	G:Carbohydrate transport and metabolism	XP_037465484.1	probable xyloglucan endotransglucosylase/hydrolase protein 23 [Triticum dicoccoides]	sp|Q38910|XTH23_ARATH;	Probable xyloglucan endotransglucosylase/hydrolase protein 23 OS=Arabidopsis thaliana OX=3702 GN=XTH23 PE=2 SV=1;	PF00722.23;PF06955.14	Glyco_hydro_16;XET_C	Glycosyl hydrolases family 16;Xyloglucan endo-transglycosylase
TraesCS7B02G292700	5.5025	19.675	12.8533	-	GO:0016020;GO:0016021;GO:0042626;GO:0140359;GO:000552	CC:membrane;CC:integral component of membrane;MF:ATPase activity, coupled to transmembrane movement of substances;MF:ABC-type transmembrane transporter activity;MF:ATP binding;	------	------	------	------	COG0842	V:Defense mechanisms	KAF7103035.1	hypothetical protein CFC21_104070 [Triticum aestivum]	sp|Q6YW62|AB44G_ORYSJ;	ABC transporter G family member 44 OS=Oryza sativa subsp. japonica OX=39947 GN=ABCG44 PE=2 SV=2;	PF01061.26;PF00005.29;PF08370.13;PF19055.2;PF13304.8;PF14510.8;PF13191.8;PF13555.8;PF00004.31;PF13481.8	ABC2_membrane;ABC_tran;PDR_assoc;ABC2_membrane_7;AAA_21;ABC_trans_N;AAA_16;AAA_29;AAA;AAA_25	ABC-2 type transporter;ABC transporter;Plant PDR ABC transporter associated;ABC-2 type transporter;AAA domain, putative AbiEii toxin, Type IV TA system;ABC-transporter N-terminal;AAA ATPase domain;P-loop containing region of AAA domain;ATPase family associated with various cellular activities;AAA domain
TraesCS7B02G268300	2.965	13.7317	7.7	O-acyltransferase [Source:UniProtKB/TrEMBL;Acc:A0A1D6C890]	GO:0019432;GO:0006071;GO:0009941;GO:0016021;GO:0005789;GO:0008374;GO:000414	BP:triglyceride biosynthetic process;BP:glycerol metabolic process;CC:chloroplast envelope;CC:integral component of membrane;CC:endoplasmic reticulum membrane;MF:O-acyltransferase activity;MF:diacylglycerol O-acyltransferase activity;	K11155	DGAT1	map00561	Glycerolipid metabolism	COG5056	I:Lipid transport and metabolism	KAF7102718.1	hypothetical protein CFC21_103801 [Triticum aestivum]	sp|A0A0P0WY03|DAT12_ORYSJ;	Diacylglycerol O-acyltransferase 1-2 OS=Oryza sativa subsp. japonica OX=39947 GN=DGAT1-2 PE=3 SV=1;	PF03062.21;PF13813.8	MBOAT;MBOAT_2	MBOAT, membrane-bound O-acyltransferase family;Membrane bound O-acyl transferase family
TraesCS7B02G259600	2.07667	4.0525	4.06167	-	GO:0000398;GO:0000956;GO:0071004;GO:0071013;GO:1990904;GO:1990726;GO:0097526;GO:0005689;GO:0005688;GO:0005681;GO:000372	BP:mRNA splicing, via spliceosome;BP:nuclear-transcribed mRNA catabolic process;CC:U2-type prespliceosome;CC:catalytic step 2 spliceosome;CC:ribonucleoprotein complex;CC:Lsm1-7-Pat1 complex;CC:spliceosomal tri-snRNP complex;CC:U12-type spliceosomal complex;CC:U6 snRNP;CC:spliceosomal complex;MF:RNA binding;	K12626	LSM7	map03018;map03040	RNA degradation;Spliceosome	ENOG4111VMJ	K:Transcription	XP_020149195.1	sm-like protein LSM7 [Aegilops tauschii subsp. strangulata]	sp|Q9SI54|LSM7_ARATH;	Sm-like protein LSM7 OS=Arabidopsis thaliana OX=3702 GN=LSM7 PE=1 SV=1;	PF01423.24	LSM	LSM domain
TraesCS7B02G259000	7.14167	73.7092	57.8233	Multiprotein bridging factor 1 [Source:UniProtKB/TrEMBL;Acc:C8C4P8]	GO:0009737;GO:0009414;GO:0009408;GO:0005730;GO:0005634;GO:0043565;GO:0003713;GO:000367	BP:response to abscisic acid;BP:response to water deprivation;BP:response to heat;CC:nucleolus;CC:nucleus;MF:sequence-specific DNA binding;MF:transcription coactivator activity;MF:DNA binding;	K03627	MBF1	------	------	COG1813	K:Transcription	XP_037463264.1	multiprotein-bridging factor 1c-like [Triticum dicoccoides]	sp|Q9LV58|MBF1C_ARATH;	Multiprotein-bridging factor 1c OS=Arabidopsis thaliana OX=3702 GN=MBF1C PE=1 SV=1;	PF08523.12;PF01381.24;PF13560.8	MBF1;HTH_3;HTH_31	Multiprotein bridging factor 1;Helix-turn-helix;Helix-turn-helix domain
TraesCS7B02G215500	5.30583	13.9383	12.5825	-	GO:0005737;GO:000588	CC:cytoplasm;CC:plasma membrane;	------	------	------	------	ENOG410XTYY	S:Function unknown	KAF7102016.1	hypothetical protein CFC21_103210 [Triticum aestivum]	------	------	PF10248.11	Mlf1IP	Myelodysplasia-myeloid leukemia factor 1-interacting protein
TraesCS7B02G168300	1.94167	20.97	16.7167	-	GO:0006355;GO:0005634;GO:0003700;GO:004356	BP:regulation of transcription, DNA-templated;CC:nucleus;MF:transcription factor activity, sequence-specific DNA binding;MF:sequence-specific DNA binding;	K09419	HSFF	------	------	COG5169	K:Transcription	XP_040251789.1	heat stress transcription factor B-2b, partial [Aegilops tauschii subsp. strangulata]	sp|Q6Z9C8|HFB2B_ORYSJ;	Heat stress transcription factor B-2b OS=Oryza sativa subsp. japonica OX=39947 GN=HSFB2B PE=2 SV=1;	PF00447.19	HSF_DNA-bind	HSF-type DNA-binding
TraesCS7B02G149200	26.9117	280.895	448.924	Heat shock protein 90 [Source:UniProtKB/TrEMBL;Acc:F4Y593]	GO:0006457;GO:0050821;GO:0034605;GO:0005829;GO:0005886;GO:0032991;GO:0048471;GO:0051082;GO:0000166;GO:0016887;GO:000552	BP:protein folding;BP:protein stabilization;BP:cellular response to heat;CC:cytosol;CC:plasma membrane;CC:macromolecular complex;CC:perinuclear region of cytoplasm;MF:unfolded protein binding;MF:nucleotide binding;MF:ATPase activity;MF:ATP binding;	K04079	HSP90A, htpG	map04626;map04141	Plant-pathogen interaction;Protein processing in endoplasmic reticulum	COG0326	O:Posttranslational modification, protein turnover, chaperones	ADF31758.1	heat shock protein 90 [Triticum aestivum]	sp|A2YWQ1|HSP81_ORYSI;	Heat shock protein 81-1 OS=Oryza sativa subsp. indica OX=39946 GN=HSP81-1 PE=2 SV=1;	PF00183.20;PF02518.28;PF13589.8	HSP90;HATPase_c;HATPase_c_3	Hsp90 protein;Histidine kinase-, DNA gyrase B-, and HSP90-like ATPase;Histidine kinase-, DNA gyrase B-, and HSP90-like ATPase
TraesCS7B02G149100	2.22333	5.8875	4.35667	Sodium/hydrogen exchanger [Source:UniProtKB/TrEMBL;Acc:A0A341YM38]	GO:0006812;GO:0006814;GO:0006885;GO:0055085;GO:0016021;GO:0015299;GO:001538	BP:cation transport;BP:sodium ion transport;BP:regulation of pH;BP:transmembrane transport;CC:integral component of membrane;MF:solut;MF:sodiu;	K14724	SLC9A8, NHE8	------	------	COG0025	P:Inorganic ion transport and metabolism	KAF7101114.1	hypothetical protein CFC21_102513 [Triticum aestivum]	sp|Q8RWU6|NHX6_ARATH;	Sodium/hydrogen exchanger 6 OS=Arabidopsis thaliana OX=3702 GN=NHX6 PE=1 SV=3;	PF00999.23	Na_H_Exchanger	Sodium/hydrogen exchanger family
TraesCS7B02G148800	3.39167	10.8008	6.355	-	GO:0006468;GO:0007166;GO:0016021;GO:0016020;GO:0005886;GO:0030247;GO:0004674;GO:0005509;GO:0004672;GO:000552	BP:protein phosphorylation;BP:cell surface receptor signaling pathway;CC:integral component of membrane;CC:membrane;CC:plasma membrane;MF:polysaccharide binding;MF:protein serine/threonine kinase activity;MF:calcium ion binding;MF:protein kinase activity;MF:ATP binding;	------	------	------	------	COG0515	T:Signal transduction mechanisms	KAF7101112.1	hypothetical protein CFC21_102509 [Triticum aestivum]	sp|Q9LMP1|WAK2_ARATH;	Wall-associated receptor kinase 2 OS=Arabidopsis thaliana OX=3702 GN=WAK2 PE=1 SV=1;	PF07714.19;PF00069.27;PF13947.8;PF07645.17;PF12662.9	PK_Tyr_Ser-Thr;Pkinase;GUB_WAK_bind;EGF_CA;cEGF	Protein tyrosine and serine/threonine kinase;Protein kinase domain;Wall-associated receptor kinase galacturonan-binding;Calcium-binding EGF domain;Complement Clr-like EGF-like
TraesCS7B02G139300	2.215	29.4783	33.3683	-	------	------	------	------	------	------	ENOG411052J	S:Function unknown	XP_037469664.1	uncharacterized protein LOC119341919 [Triticum dicoccoides]	------	------	------	------	------
TraesCS7B02G139200	2.62833	3.80333	3.27333	-	GO:0005634;GO:0008270;GO:000367	CC:nucleus;MF:zinc ion binding;MF:DNA binding;	------	------	------	------	ENOG4111HPQ	S:Function unknown	KAF7101001.1	hypothetical protein CFC21_102411 [Triticum aestivum]	sp|Q8LA53|MBD2_ARATH;	Methyl-CpG-binding domain-containing protein 2 OS=Arabidopsis thaliana OX=3702 GN=MBD2 PE=1 SV=1;	PF01429.21;PF07496.17	MBD;zf-CW	Methyl-CpG binding domain;CW-type Zinc Finger
TraesCS7B02G130900	6.8575	66.7408	79.6458	-	------	------	K13993	HSP20	map04141	Protein processing in endoplasmic reticulum	------	------	XP_037466616.1	26.2 kDa heat shock protein, mitochondrial-like [Triticum dicoccoides]	sp|Q67X83|HS26M_ORYSJ;	26.2 kDa heat shock protein, mitochondrial OS=Oryza sativa subsp. japonica OX=39947 GN=HSP26.2 PE=2 SV=1;	PF00011.23	HSP20	Hsp20/alpha crystallin family
TraesCS7B02G125400	2.46417	3.89167	4.38833	-	GO:001602	CC:integral component of membrane;	------	------	------	------	ENOG410XS5D	S:Function unknown	XP_037465783.1	C2 and GRAM domain-containing protein At1g03370-like [Triticum dicoccoides]	sp|Q9ZVT9|C2GR1_ARATH;	C2 and GRAM domain-containing protein At1g03370 OS=Arabidopsis thaliana OX=3702 GN=At1g03370 PE=2 SV=4;	PF16016.7;PF00168.32;PF02893.22	VASt;C2;GRAM	VAD1 Analog of StAR-related lipid transfer domain;C2 domain;GRAM domain
TraesCS7B02G109100	2.66583	10.8275	14.3067	15.7 kDa heat shock protein, peroxisomal [Source:Projected from Arabidopsis thaliana (AT5G37670) UniProtKB/Swiss-Prot;Acc:Q9FHQ3]	GO:0051259;GO:0006457;GO:0042542;GO:0009651;GO:0000302;GO:0009408;GO:0005777;GO:0005782;GO:0051082;GO:004362	BP:protein oligomerization;BP:protein folding;BP:response to hydrogen peroxide;BP:response to salt stress;BP:response to reactive oxygen species;BP:response to heat;CC:peroxisome;CC:peroxisomal matrix;MF:unfolded protein binding;MF:protein self-association;	K13993	HSP20	map04141	Protein processing in endoplasmic reticulum	COG0071	O:Posttranslational modification, protein turnover, chaperones	KAF7100587.1	hypothetical protein CFC21_102082 [Triticum aestivum]	sp|Q652V8|HSP16_ORYSJ;	16.0 kDa heat shock protein, peroxisomal OS=Oryza sativa subsp. japonica OX=39947 GN=HSP16.0 PE=2 SV=1;	PF00011.23;PF17886.3	HSP20;ArsA_HSP20	Hsp20/alpha crystallin family;HSP20-like domain found in ArsA
TraesCS7B02G084300	3.78083	14.825	9.54833	-	GO:000561	CC:extracellular space;	------	------	------	------	ENOG41107QF;ENOG41106HT	S:Function unknown;	XP_037467553.1	protein PHOSPHATE-INDUCED 1-like [Triticum dicoccoides]	sp|O82161|PHI1_TOBAC;	Protein PHOSPHATE-INDUCED 1 OS=Nicotiana tabacum OX=4097 GN=PHI-1 PE=2 SV=1;	PF04674.14	Phi_1	Phosphate-induced protein 1 conserved region
TraesCS7B02G083500	1.7225	79.6092	72.16	-	------	------	K13993	HSP20	map04141	Protein processing in endoplasmic reticulum	------	------	XP_037468602.1	26.2 kDa heat shock protein, mitochondrial-like [Triticum dicoccoides]	sp|Q67X83|HS26M_ORYSJ;	26.2 kDa heat shock protein, mitochondrial OS=Oryza sativa subsp. japonica OX=39947 GN=HSP26.2 PE=2 SV=1;	PF00011.23;PF17886.3	HSP20;ArsA_HSP20	Hsp20/alpha crystallin family;HSP20-like domain found in ArsA
TraesCS7B02G083400	60.8008	230.132	375.59	-	------	------	K13993	HSP20	map04141	Protein processing in endoplasmic reticulum	------	------	VAI84288.1	unnamed protein product [Triticum turgidum subsp. durum]	sp|Q67X83|HS26M_ORYSJ;	26.2 kDa heat shock protein, mitochondrial OS=Oryza sativa subsp. japonica OX=39947 GN=HSP26.2 PE=2 SV=1;	PF00011.23;PF17886.3	HSP20;ArsA_HSP20	Hsp20/alpha crystallin family;HSP20-like domain found in ArsA
TraesCS7B02G083300	1.63083	15.6208	19.46	-	------	------	K13993	HSP20	map04141	Protein processing in endoplasmic reticulum	------	------	KAF7100275.1	hypothetical protein CFC21_101808 [Triticum aestivum]	sp|Q6Z7V2|HS24M_ORYSJ;	24.1 kDa heat shock protein, mitochondrial OS=Oryza sativa subsp. japonica OX=39947 GN=HSP24.1 PE=2 SV=1;	PF00011.23;PF17886.3	HSP20;ArsA_HSP20	Hsp20/alpha crystallin family;HSP20-like domain found in ArsA
TraesCS7B02G083100	1.5125	51.9625	25.9075	-	------	------	K13993	HSP20	map04141	Protein processing in endoplasmic reticulum	------	------	XP_037469599.1	26.2 kDa heat shock protein, mitochondrial-like [Triticum dicoccoides]	sp|Q6Z7V2|HS24M_ORYSJ;	24.1 kDa heat shock protein, mitochondrial OS=Oryza sativa subsp. japonica OX=39947 GN=HSP24.1 PE=2 SV=1;	PF00011.23;PF17886.3	HSP20;ArsA_HSP20	Hsp20/alpha crystallin family;HSP20-like domain found in ArsA
TraesCS7B02G082900	2.5575	20.0833	17.2942	-	------	------	K13993	HSP20	map04141	Protein processing in endoplasmic reticulum	------	------	KAF7100268.1	LOW QUALITY PROTEIN: hypothetical protein CFC21_101802 [Triticum aestivum]	sp|Q67X83|HS26M_ORYSJ;	26.2 kDa heat shock protein, mitochondrial OS=Oryza sativa subsp. japonica OX=39947 GN=HSP26.2 PE=2 SV=1;	PF00011.23;PF17886.3	HSP20;ArsA_HSP20	Hsp20/alpha crystallin family;HSP20-like domain found in ArsA
TraesCS7B02G069500	4.66	10.8983	11.4092	-	GO:0009570;GO:0005504;GO:001687	CC:chloroplast stroma;MF:fatty acid binding;MF:intramolecular lyase activity;	------	------	------	------	ENOG411267K	S:Function unknown	XP_037466083.1	fatty-acid-binding protein 2-like [Triticum dicoccoides]	sp|Q84RK2|FAP2_ARATH;	Fatty-acid-binding protein 2 OS=Arabidopsis thaliana OX=3702 GN=FAP2 PE=2 SV=2;	PF16035.7;PF02431.17;PF16036.7	Chalcone_2;Chalcone;Chalcone_3	Chalcone isomerase like;Chalcone-flavanone isomerase;Chalcone isomerase-like
TraesCS7B02G064100	0.984167	11.4642	11.7258	-	------	------	------	------	------	------	COG0484	O:Posttranslational modification, protein turnover, chaperones	KAF7100029.1	hypothetical protein CFC21_101590 [Triticum aestivum]	sp|Q7NXI1|DNAJ_CHRVO;	Chaperone protein DnaJ OS=Chromobacterium violaceum;	PF00226.33	DnaJ	DnaJ domain
TraesCS7B02G064000	1.29333	54.2067	37.7517	-	------	------	------	------	------	------	COG0484;COG2214	O:Posttranslational modification, protein turnover, chaperones;	KAF7100028.1	hypothetical protein CFC21_101589 [Triticum aestivum]	sp|A5EYE5|DNAJ_DICNV;	Chaperone protein DnaJ OS=Dichelobacter nodosus;	PF00226.33	DnaJ	DnaJ domain
TraesCS7A02G556200	11.2742	28.6017	22.5542	-	GO:001602	CC:integral component of membrane;	------	------	------	------	ENOG411057G;ENOG41121N2	S:Function unknown;O:Posttranslational modification, protein turnover, chaperones	XP_037459664.1	probable E3 ubiquitin-protein ligase ATL44 [Triticum dicoccoides]	sp|O22755|ATL44_ARATH;	Probable E3 ubiquitin-protein ligase ATL44 OS=Arabidopsis thaliana OX=3702 GN=ATL44 PE=1 SV=1;	PF13639.8;PF17123.7;PF12678.9;PF13923.8;PF00097.27;PF13445.8;PF13920.8;PF11793.10;PF14634.8	zf-RING_2;zf-RING_11;zf-rbx1;zf-C3HC4_2;zf-C3HC4;zf-RING_UBOX;zf-C3HC4_3;FANCL_C;zf-RING_5	Ring finger domain;RING-like zinc finger;RING-H2 zinc finger domain;Zinc finger, C3HC4 type;Zinc finger, C3HC4 type;RING-type zinc-finger;Zinc finger, C3HC4 type;FANCL C-terminal domain;zinc-RING finger domain
TraesCS7A02G495800	1.755	8.69833	3.5975	AP2-like ethylene-responsive transcription factor AIL5 [Source:Projected from Arabidopsis thaliana (AT5G57390) UniProtKB/Swiss-Prot;Acc:Q6PQQ3]	GO:0006355;GO:0006351;GO:0005634;GO:0003700;GO:000367	BP:regulation of transcription, DNA-templated;BP:transcription, DNA-templated;CC:nucleus;MF:transcription factor activity, sequence-specific DNA binding;MF:DNA binding;	K09285	OVM, ANT	------	------	ENOG410Y90A	K:Transcription	KAF7098370.1	hypothetical protein CFC21_100116 [Triticum aestivum]	sp|Q5YGP7|PLET2_ARATH;	AP2-like ethylene-responsive transcription factor PLT2 OS=Arabidopsis thaliana OX=3702 GN=PLT2 PE=2 SV=1;	PF00847.22	AP2	AP2 domain
TraesCS7A02G477200	2.34833	5.27667	5.54333	-	------	------	------	------	------	------	------	------	KAF7098137.1	hypothetical protein CFC21_099903 [Triticum aestivum]	------	------	------	------	------
TraesCS7A02G464400	4.30333	9.87083	8.12333	Patatin [Source:UniProtKB/TrEMBL;Acc:A0A341YII2]	GO:0006629;GO:0016042;GO:001678	BP:lipid metabolic process;BP:lipid catabolic process;MF:hydrolase activity;	------	------	------	------	COG3621	S:Function unknown	KAF7097992.1	hypothetical protein CFC21_099765 [Triticum aestivum]	sp|B8B7E7|PLP3_ORYSI;	Patatin-like protein 3 OS=Oryza sativa subsp. indica OX=39946 GN=PLP3 PE=3 SV=1;	PF01734.24	Patatin	Patatin-like phospholipase
TraesCS7A02G463900	3.43	4.9725	7.09333	-	GO:0006952;GO:0005524;GO:004353	BP:defense response;MF:ATP binding;MF:ADP binding;	------	------	------	------	COG4886	S:Function unknown	XP_037458065.1	disease resistance protein Pik-2-like [Triticum dicoccoides]	sp|F7J0M4|RGA4R_ORYSJ;	Disease resistance protein RGA4 OS=Oryza sativa subsp. japonica OX=39947 GN=RGA4 PE=1 SV=1;	PF00931.24;PF13191.8;PF13173.8	NB-ARC;AAA_16;AAA_14	NB-ARC domain;AAA ATPase domain;AAA domain
TraesCS7A02G451100	6.15333	33.415	36.1067	HSA32 [Source:Projected from Arabidopsis thaliana (AT4G21320) UniProtKB/TrEMBL;Acc:A0A178UV51]	GO:0010286;GO:0010608;GO:000382	BP:heat acclimation;BP:posttranscriptional regulation of gene expression;MF:catalytic activity;	------	------	------	------	COG1809	S:Function unknown	XP_037457278.1	protein HEAT-STRESS-ASSOCIATED 32-like [Triticum dicoccoides]	sp|Q8GWL1|HSA32_ARATH;	Protein HEAT-STRESS-ASSOCIATED 32 OS=Arabidopsis thaliana OX=3702 GN=HSA32 PE=2 SV=1;	PF02679.17	ComA
TraesCS7A02G403900	1.98167	10.79	3.555	-	GO:0006355;GO:0005634;GO:0003700;GO:004698	BP:regulation of transcription, DNA-templated;CC:nucleus;MF:transcription factor activity, sequence-specific DNA binding;MF:protein dimerization activity;	------	------	------	------	ENOG410YEV1;COG2124	K:Transcription;Q:Secondary metabolites biosynthesis, transport and catabolism	XP_037459291.1	transcription factor bHLH48-like [Triticum dicoccoides]	sp|Q8VZ02|BH048_ARATH;	Transcription factor bHLH48 OS=Arabidopsis thaliana OX=3702 GN=BHLH48 PE=2 SV=1;	------	------	------
TraesCS7A02G391100	1.30167	7.61333	3.25667	-	GO:0016021;GO:0016020;GO:0042626;GO:0140359;GO:0016887;GO:000552	CC:integral component of membrane;CC:membrane;MF:ATPase activity, coupled to transmembrane movement of substances;MF:ABC-type transmembrane transporter activity;MF:ATPase activity;MF:ATP binding;	------	------	------	------	COG0842	V:Defense mechanisms	KAF7097124.1	hypothetical protein CFC21_098977 [Triticum aestivum]	sp|Q6YW62|AB44G_ORYSJ;	ABC transporter G family member 44 OS=Oryza sativa subsp. japonica OX=39947 GN=ABCG44 PE=2 SV=2;	PF01061.26;PF00005.29;PF08370.13;PF19055.2;PF13304.8;PF14510.8;PF13555.8;PF13191.8;PF00004.31;PF13481.8	ABC2_membrane;ABC_tran;PDR_assoc;ABC2_membrane_7;AAA_21;ABC_trans_N;AAA_29;AAA_16;AAA;AAA_25	ABC-2 type transporter;ABC transporter;Plant PDR ABC transporter associated;ABC-2 type transporter;AAA domain, putative AbiEii toxin, Type IV TA system;ABC-transporter N-terminal;P-loop containing region of AAA domain;AAA ATPase domain;ATPase family associated with various cellular activities;AAA domain
TraesCS7A02G369500	11.7433	124.891	144.914	MBF1C [Source:Projected from Arabidopsis thaliana (AT3G24500) UniProtKB/TrEMBL;Acc:A0A178VDH9]	GO:0009737;GO:0009414;GO:0009408;GO:0005730;GO:0005634;GO:0003713;GO:000367	BP:response to abscisic acid;BP:response to water deprivation;BP:response to heat;CC:nucleolus;CC:nucleus;MF:transcription coactivator activity;MF:DNA binding;	K03627	MBF1	------	------	COG1813	K:Transcription	XP_037462899.1	multiprotein-bridging factor 1c-like [Triticum dicoccoides]	sp|Q9LV58|MBF1C_ARATH;	Multiprotein-bridging factor 1c OS=Arabidopsis thaliana OX=3702 GN=MBF1C PE=1 SV=1;	PF08523.12;PF01381.24;PF13560.8	MBF1;HTH_3;HTH_31	Multiprotein bridging factor 1;Helix-turn-helix;Helix-turn-helix domain
TraesCS7A02G334300	4.5825	9.3875	7.0325	Glycosyltransferase [Source:UniProtKB/TrEMBL;Acc:A0A1D6BQL7]	GO:0016758;GO:000819	MF:transferase activity, transferring hexosyl groups;MF:UDP-glycosyltransferase activity;	------	------	------	------	COG1819	S:Function unknown	KAF7096473.1	hypothetical protein CFC21_098412 [Triticum aestivum]	sp|Q4R1I9|ANGLT_ROSHC;	Anthocyanidin 5,3-O-glucosyltransferase OS=Rosa hybrid cultivar OX=128735 GN=RhGT1 PE=2 SV=1;	PF00201.20	UDPGT	UDP-glucoronosyl and UDP-glucosyl transferase
TraesCS7A02G323300	1.67917	14.4858	6.47917	-	GO:0040008;GO:0043086;GO:0048046;GO:0004857;GO:004691	BP:regulation of growth;BP:negative regulation of catalytic activity;CC:apoplast;MF:enzyme inhibitor activity;MF:pectinesterase inhibitor activity;	------	------	------	------	ENOG410YWNR	S:Function unknown	KAF7096328.1	hypothetical protein CFC21_098289 [Triticum aestivum]	sp|Q0J8J8|PMI28_ORYSJ;	Pectinesterase inhibitor 28 OS=Oryza sativa subsp. japonica OX=39947 GN=PMEI28 PE=2 SV=1;	PF04043.17	PMEI	Plant invertase/pectin methylesterase inhibitor
TraesCS7A02G288200	4.52417	6.40333	5.97083	-	GO:001602	CC:integral component of membrane;	------	------	------	------	ENOG410YWEU	S:Function unknown	XP_037458169.1	uncharacterized protein LOC119329258 [Triticum dicoccoides]	------	------	------	------	------
TraesCS7A02G272400	2.59333	5.0325	4.84333	-	GO:0005975;GO:0005618;GO:0005773;GO:0030246;GO:0004565;GO:000455	BP:carbohydrate metabolic process;CC:cell wall;CC:vacuole;MF:carbohydrate binding;MF:beta-galactosidase activity;MF:hydrolase activity, hydrolyzing O-glycosyl compounds;	------	------	------	------	COG1874	G:Carbohydrate transport and metabolism	KAF7095632.1	hypothetical protein CFC21_097750 [Triticum aestivum]	sp|Q6ZJJ0|BGA11_ORYSJ;	Beta-galactosidase 11 OS=Oryza sativa subsp. japonica OX=39947 GN=Os08g0549200 PE=2 SV=1;	PF01301.21;PF17834.3;PF02140.20;PF02449.17	Glyco_hydro_35;GHD;Gal_Lectin;Glyco_hydro_42	Glycosyl hydrolases family 35;Beta-sandwich domain in beta galactosidase;Galactose binding lectin domain;Beta-galactosidase
TraesCS7A02G270100	0.874167	11.2717	9.2475	Heat-responsive transcription factor [Source:UniProtKB/TrEMBL;Acc:A0A0D3QT57]	GO:0006355;GO:0006357;GO:0005634;GO:0043565;GO:0003700;GO:0003677;GO:000097	BP:regulation of transcription, DNA-templated;BP:regulation of transcription from RNA polymerase II promoter;CC:nucleus;MF:sequence-specific DNA binding;MF:transcription factor activity, sequence-specific DNA binding;MF:DNA binding;MF:RNA polymerase II core promoter proximal region sequence-specific DNA binding;	K09419	HSFF	------	------	COG5169	K:Transcription	XP_040251789.1	heat stress transcription factor B-2b, partial [Aegilops tauschii subsp. strangulata]	sp|Q6Z9C8|HFB2B_ORYSJ;	Heat stress transcription factor B-2b OS=Oryza sativa subsp. japonica OX=39947 GN=HSFB2B PE=2 SV=1;	PF00447.19	HSF_DNA-bind	HSF-type DNA-binding
TraesCS7A02G266200	5.2875	10.9742	9.0125	-	GO:0051781;GO:0009793;GO:0005773;GO:0016787;GO:003472	BP:positive regulation of cell division;BP:embryo development ending in seed dormancy;CC:vacuole;MF:hydrolase activity;MF:gamma-glutamyl-peptidase activity;	------	------	------	------	------	------	KAF7095540.1	hypothetical protein CFC21_097685 [Triticum aestivum]	------	------	------	------	------
TraesCS7A02G242200	24.1608	293.373	441.071	-	GO:0006457;GO:0034605;GO:0050821;GO:0005886;GO:0032991;GO:0048471;GO:0005829;GO:0051082;GO:0000166;GO:0016887;GO:000552	BP:protein folding;BP:cellular response to heat;BP:protein stabilization;CC:plasma membrane;CC:macromolecular complex;CC:perinuclear region of cytoplasm;CC:cytosol;MF:unfolded protein binding;MF:nucleotide binding;MF:ATPase activity;MF:ATP binding;	K04079	HSP90A, htpG	map04626;map04141	Plant-pathogen interaction;Protein processing in endoplasmic reticulum	COG0326	O:Posttranslational modification, protein turnover, chaperones	KAF7095250.1	hypothetical protein CFC21_097460 [Triticum aestivum]	sp|A2YWQ1|HSP81_ORYSI;	Heat shock protein 81-1 OS=Oryza sativa subsp. indica OX=39946 GN=HSP81-1 PE=2 SV=1;	PF00183.20;PF02518.28;PF13589.8	HSP90;HATPase_c;HATPase_c_3	Hsp90 protein;Histidine kinase-, DNA gyrase B-, and HSP90-like ATPase;Histidine kinase-, DNA gyrase B-, and HSP90-like ATPase
TraesCS7A02G236700	1.515	6.34667	6.56	-	------	------	K13993	HSP20	map04141	Protein processing in endoplasmic reticulum	------	------	KAF7095170.1	hypothetical protein CFC21_097392 [Triticum aestivum]	sp|Q6Z7V2|HS24M_ORYSJ;	24.1 kDa heat shock protein, mitochondrial OS=Oryza sativa subsp. japonica OX=39947 GN=HSP24.1 PE=2 SV=1;	PF00011.23;PF17886.3	HSP20;ArsA_HSP20	Hsp20/alpha crystallin family;HSP20-like domain found in ArsA
TraesCS7A02G232500	13.0242	117.507	159.95	-	------	------	K13993	HSP20	map04141	Protein processing in endoplasmic reticulum	------	------	XP_037459707.1	26.2 kDa heat shock protein, mitochondrial-like [Triticum dicoccoides]	sp|Q67X83|HS26M_ORYSJ;	26.2 kDa heat shock protein, mitochondrial OS=Oryza sativa subsp. japonica OX=39947 GN=HSP26.2 PE=2 SV=1;	PF00011.23;PF17886.3	HSP20;ArsA_HSP20	Hsp20/alpha crystallin family;HSP20-like domain found in ArsA
TraesCS7A02G229500	5.17167	7.51833	5.32583	-	GO:001602	CC:integral component of membrane;	------	------	------	------	ENOG410YGU9	S:Function unknown	XP_037461765.1	uncharacterized GPI-anchored protein At4g28100-like [Triticum dicoccoides]	sp|Q9SUC9|UGPI7_ARATH;	Uncharacterized GPI-anchored protein At4g28100 OS=Arabidopsis thaliana OX=3702 GN=At4g28100 PE=2 SV=1;	PF19160.2	SPARK	SPARK
TraesCS7A02G218500	2.445	5.01083	4.80333	-	GO:001602	CC:integral component of membrane;	------	------	------	------	ENOG410XS5D	S:Function unknown	VAI73153.1	unnamed protein product [Triticum turgidum subsp. durum]	sp|Q9ZVT9|C2GR1_ARATH;	C2 and GRAM domain-containing protein At1g03370 OS=Arabidopsis thaliana OX=3702 GN=At1g03370 PE=2 SV=4;	PF16016.7;PF00168.32;PF02893.22	VASt;C2;GRAM	VAD1 Analog of StAR-related lipid transfer domain;C2 domain;GRAM domain
TraesCS7A02G215800	11.0125	22.5	23.1158	Leucine-rich repeat receptor-like serine/threonine/tyrosine-protein kinase SOBIR1 [Source:Projected from Arabidopsis thaliana (AT2G31880) UniProtKB/Swiss-Prot;Acc:Q9SKB2]	GO:0006468;GO:0031349;GO:0010942;GO:0060862;GO:0016021;GO:0005886;GO:0004674;GO:0004713;GO:0004672;GO:000552	BP:protein phosphorylation;BP:positive regulation of defense response;BP:positive regulation of cell death;BP:negative regulation of floral organ abscission;CC:integral component of membrane;CC:plasma membrane;MF:protein serine/threonine kinase activity;MF:protein tyrosine kinase activity;MF:protein kinase activity;MF:ATP binding;	------	------	------	------	COG0515	T:Signal transduction mechanisms	KAF7094913.1	hypothetical protein CFC21_097183 [Triticum aestivum]	sp|Q9SKB2|SBIR1_ARATH;	Leucine-rich repeat receptor-like serine/threonine/tyrosine-protein kinase SOBIR1 OS=Arabidopsis thaliana OX=3702 GN=SOBIR1 PE=1 SV=1;	PF00069.27;PF07714.19;PF17667.3;PF01636.25	Pkinase;PK_Tyr_Ser-Thr;Pkinase_fungal;APH	Protein kinase domain;Protein tyrosine and serine/threonine kinase;Fungal protein kinase;Phosphotransferase enzyme family
TraesCS7A02G197100	3.915	15.8467	11.8608	-	GO:001602	CC:integral component of membrane;	------	------	------	------	ENOG410YR9W	S:Function unknown	KAF7094693.1	hypothetical protein CFC21_096983 [Triticum aestivum]	------	------	------	------	------
TraesCS7A02G193700	2.11083	4.83333	3.225	-	------	------	------	------	------	------	------	------	KAF7094654.1	hypothetical protein CFC21_096948 [Triticum aestivum]	------	------	------	------	------
TraesCS7A02G178500	3.84083	10.3842	8.13167	-	GO:000561	CC:extracellular space;	------	------	------	------	ENOG41107QF;ENOG41106HT	S:Function unknown;	KAF7094474.1	hypothetical protein CFC21_096782 [Triticum aestivum]	sp|O82161|PHI1_TOBAC;	Protein PHOSPHATE-INDUCED 1 OS=Nicotiana tabacum OX=4097 GN=PHI-1 PE=2 SV=1;	PF04674.14	Phi_1	Phosphate-induced protein 1 conserved region
TraesCS7A02G163700	6.36833	14.0833	13.6792	-	GO:0009570;GO:0005504;GO:001687	CC:chloroplast stroma;MF:fatty acid binding;MF:intramolecular lyase activity;	------	------	------	------	ENOG411267K	S:Function unknown	XP_037459322.1	fatty-acid-binding protein 2-like [Triticum dicoccoides]	sp|Q84RK2|FAP2_ARATH;	Fatty-acid-binding protein 2 OS=Arabidopsis thaliana OX=3702 GN=FAP2 PE=2 SV=2;	PF16035.7;PF02431.17;PF16036.7	Chalcone_2;Chalcone;Chalcone_3	Chalcone isomerase like;Chalcone-flavanone isomerase;Chalcone isomerase-like
TraesCS7A02G159700	2.87583	5.23833	3.8625	-	GO:001602	CC:integral component of membrane;	------	------	------	------	ENOG4111XCB	S:Function unknown	VAI83859.1	unnamed protein product [Triticum turgidum subsp. durum]	------	------	------	------	------
TraesCS7A02G159600	1.88167	61.7542	43.5692	-	------	------	------	------	------	------	COG0484;COG2214	O:Posttranslational modification, protein turnover, chaperones;	KAF7094275.1	hypothetical protein CFC21_096597 [Triticum aestivum]	sp|A5EYE5|DNAJ_DICNV;	Chaperone protein DnaJ OS=Dichelobacter nodosus;	PF00226.33	DnaJ	DnaJ domain
TraesCS7A02G159500	1.02833	23.2083	18.4958	-	------	------	------	------	------	------	COG0484;COG2214	O:Posttranslational modification, protein turnover, chaperones;	KAF7094274.1	hypothetical protein CFC21_096596 [Triticum aestivum]	sp|A5EYE5|DNAJ_DICNV;	Chaperone protein DnaJ OS=Dichelobacter nodosus;	PF00226.33	DnaJ	DnaJ domain
TraesCS7A02G128800	5.74167	17.9417	11.2883	-	GO:0006355;GO:0006351;GO:0005634;GO:0003700;GO:000367	BP:regulation of transcription, DNA-templated;BP:transcription, DNA-templated;CC:nucleus;MF:transcription factor activity, sequence-specific DNA binding;MF:DNA binding;	K09286	EREBP	------	------	ENOG410YR77;ENOG41116MV	K:Transcription;	XP_037459824.1	ethylene-responsive transcription factor RAP2-1-like [Triticum dicoccoides]	sp|Q8LC30|RAP21_ARATH;	Ethylene-responsive transcription factor RAP2-1 OS=Arabidopsis thaliana OX=3702 GN=RAP2-1 PE=2 SV=1;	PF00847.22	AP2	AP2 domain
TraesCS7A02G125600	2.63167	6.90417	4.4	Glutamyl-tRNA reductase [Source:UniProtKB/TrEMBL;Acc:A0A1D6BWY3]	GO:0015995;GO:0006782;GO:0033014;GO:0009507;GO:0050661;GO:000888	BP:chlorophyll biosynthetic process;BP:protoporphyrinogen IX biosynthetic process;BP:tetrapyrrole biosynthetic process;CC:chloroplast;MF:NADP binding;MF:glutamyl-tRNA reductase activity;	K02492	hemA	map00860;map01240	Porphyrin and chlorophyll metabolism;Biosynthesis of cofactors	COG0373	H:Coenzyme transport and metabolism	KAF7093873.1	hypothetical protein CFC21_096255 [Triticum aestivum]	sp|O65796|HEM13_HORVU;	Glutamyl-tRNA reductase 3, chloroplastic OS=Hordeum vulgare OX=4513 GN=HEMA3 PE=2 SV=1;	PF05201.17;PF01488.22;PF00745.22;PF03807.19;PF03446.17;PF13460.8;PF02423.17;PF03435.20;PF02254.20;PF02558.18;PF02826.21;PF03721.16	GlutR_N;Shikimate_DH;GlutR_dimer;F420_oxidored;NAD_binding_2;NAD_binding_10;OCD_Mu_crystall;Sacchrp_dh_NADP;TrkA_N;ApbA;2-Hacid_dh_C;UDPG_MGDP_dh_N	Glutamyl-tRNAGlu reductase, N-terminal domain;Shikimate / quinate 5-dehydrogenase;Glutamyl-tRNAGlu reductase, dimerisation domain;NADP oxidoreductase coenzyme F420-dependent;NAD binding domain of 6-phosphogluconate dehydrogenase;NA;Ornithine cyclodeaminase/mu-crystallin family;Saccharopine dehydrogenase NADP binding domain;TrkA-N domain;Ketopantoate reductase PanE/ApbA;D-isomer specific 2-hydroxy…
TraesCS7A02G123300	3.06333	4.77583	3.3325	-	GO:001602	CC:integral component of membrane;	------	------	------	------	ENOG410YF3V	S:Function unknown	XP_037460331.1	uncharacterized protein LOC119331263 [Triticum dicoccoides]	------	------	PF03168.15	LEA_2	Late embryogenesis abundant protein
TraesCS6D02G393700	2.08333	33.0417	35.9125	-	GO:0051087;GO:000551	MF:chaperone binding;MF:protein binding;	------	------	------	------	ENOG410YW7W	S:Function unknown	KAF6996387.1	hypothetical protein CFC21_012731 [Triticum aestivum]	------	------	PF02179.18	BAG	BAG domain
TraesCS6D02G377200	2.4025	4.24583	3.66917	-	------	------	------	------	------	------	COG0553;ENOG410Z0AJ	L:Replication, recombination and repair;S:Function unknown	XP_020154651.1	uncharacterized protein LOC109740014 isoform X1 [Aegilops tauschii subsp. strangulata]	sp|F4KBP5|CHR4_ARATH;	Protein CHROMATIN REMODELING 4 OS=Arabidopsis thaliana OX=3702 GN=CHR4 PE=2 SV=1;	------	------	------
TraesCS6D02G364400	10.545	39.2542	35.2258	COBRA-like protein [Source:UniProtKB/TrEMBL;Acc:A0A1D6SB58]	GO:0010215;GO:003122	BP:cellulose microfibril organization;CC:anchored component of membrane;	------	------	------	------	ENOG410YAAC	S:Function unknown	KAF7091931.1	hypothetical protein CFC21_094472 [Triticum aestivum]	sp|Q60E70|COBL3_ORYSJ;	COBRA-like protein 3 OS=Oryza sativa subsp. japonica OX=39947 GN=BC1L4 PE=2 SV=1;	PF04833.17	COBRA	COBRA-like protein
TraesCS6D02G322300	1.705	99.8008	70.2883	17.4 kDa class III heat shock protein [Source:Projected from Arabidopsis thaliana (AT1G54050) UniProtKB/Swiss-Prot;Acc:Q9SYG1]	GO:0051259;GO:0006457;GO:0042542;GO:0009651;GO:0009408;GO:0009644;GO:0005737;GO:0051082;GO:004362	BP:protein oligomerization;BP:protein folding;BP:response to hydrogen peroxide;BP:response to salt stress;BP:response to heat;BP:response to high light intensity;CC:cytoplasm;MF:unfolded protein binding;MF:protein self-association;	K13993	HSP20	map04141	Protein processing in endoplasmic reticulum	COG0071	O:Posttranslational modification, protein turnover, chaperones	XP_020181941.1	18.6 kDa class III heat shock protein [Aegilops tauschii subsp. strangulata]	sp|Q6K7E9|HS186_ORYSJ;	18.6 kDa class III heat shock protein OS=Oryza sativa subsp. japonica OX=39947 GN=HSP18.6 PE=2 SV=1;	PF00011.23;PF17886.3	HSP20;ArsA_HSP20	Hsp20/alpha crystallin family;HSP20-like domain found in ArsA
TraesCS6D02G303600	2.9475	14.4392	11.7375	-	GO:0005737;GO:0005886;GO:004362	CC:cytoplasm;CC:plasma membrane;MF:protein self-association;	------	------	------	------	ENOG4111KQ7	S:Function unknown	VAI49851.1	unnamed protein product [Triticum turgidum subsp. durum]	sp|Q8L4N1|PHO34_ARATH;	Universal stress protein PHOS34 OS=Arabidopsis thaliana OX=3702 GN=PHOS34 PE=1 SV=1;	PF00582.28	Usp	Universal stress protein family
TraesCS6D02G297600	5.79	15.4208	13.8167	-	GO:0032259;GO:0016021;GO:000816	BP:methylation;CC:integral component of membrane;MF:methyltransferase activity;	K23870	QUA2, TSD2	------	------	ENOG410Y9W6	S:Function unknown	KAF7091152.1	hypothetical protein CFC21_093796 [Triticum aestivum]	sp|Q9C9Q8|PMTT_ARATH;	Probable pectin methyltransferase QUA2 OS=Arabidopsis thaliana OX=3702 GN=QUA2 PE=1 SV=2;	PF03141.18;PF08241.14;PF13649.8	Methyltransf_29;Methyltransf_11;Methyltransf_25	Putative S-adenosyl-L-methionine-dependent methyltransferase;Methyltransferase domain;Methyltransferase domain
TraesCS6D02G296100	6.95	34.1675	18.2733	-	GO:0048046;GO:000561	CC:apoplast;CC:extracellular space;	------	------	------	------	ENOG410YFUT	S:Function unknown	XP_020171839.1	protein PHOSPHATE-INDUCED 1 homolog [Aegilops tauschii subsp. strangulata]	sp|Q6Z7W3|PHI1_ORYSJ;	Protein PHOSPHATE-INDUCED 1 homolog OS=Oryza sativa subsp. japonica OX=39947 GN=PHI-1 PE=2 SV=1;	PF04674.14	Phi_1	Phosphate-induced protein 1 conserved region
TraesCS6D02G295500	9.7725	286.297	324.588	-	GO:0009408;GO:000697	BP:response to heat;BP:response to osmotic stress;	K13993	HSP20	map04141	Protein processing in endoplasmic reticulum	COG0071	O:Posttranslational modification, protein turnover, chaperones	XP_020154915.1	24.1 kDa heat shock protein, mitochondrial isoform X1 [Aegilops tauschii subsp. strangulata]	sp|Q6Z7V2|HS24M_ORYSJ;	24.1 kDa heat shock protein, mitochondrial OS=Oryza sativa subsp. japonica OX=39947 GN=HSP24.1 PE=2 SV=1;	PF00011.23;PF17886.3	HSP20;ArsA_HSP20	Hsp20/alpha crystallin family;HSP20-like domain found in ArsA
TraesCS6D02G273500	20.8883	117.338	136.748	-	GO:0006355;GO:0006357;GO:0045944;GO:0006351;GO:0005634;GO:0003700;GO:0003677;GO:0046983;GO:0000978;GO:0000981;GO:000097	BP:regulation of transcription, DNA-templated;BP:regulation of transcription from RNA polymerase II promoter;BP:positive regulation of transcription from RNA polymerase II promoter;BP:transcription, DNA-templated;CC:nucleus;MF:transcription factor activity, sequence-specific DNA binding;MF:DNA binding;MF:protein dimerization activity;MF:RNA polymerase II core promoter proximal region sequence-spe…	K09264	K09264	------	------	COG5068	K:Transcription	KAF7090844.1	hypothetical protein CFC21_093533 [Triticum aestivum]	sp|Q6Z6W2|MAD57_ORYSJ;	MADS-box transcription factor 57 OS=Oryza sativa subsp. japonica OX=39947 GN=MADS57 PE=1 SV=2;	PF00319.20;PF01486.19	SRF-TF;K-box	SRF-type transcription factor;K-box region
TraesCS6D02G250500	4.20917	13.805	7.59167	-	------	------	------	------	------	------	ENOG410YD1C	S:Function unknown	XP_020189007.1	protein RGF1 INDUCIBLE TRANSCRIPTION FACTOR 1 [Aegilops tauschii subsp. strangulata]	sp|Q1G3Q4|RITF1_ARATH;	Protein RGF1 INDUCIBLE TRANSCRIPTION FACTOR 1 OS=Arabidopsis thaliana OX=3702 GN=RITF1 PE=1 SV=1;	PF04640.16	PLATZ	PLATZ transcription factor
TraesCS6D02G248600	0.855	29.3375	5.83083	-	GO:0019941;GO:0016567;GO:0005737;GO:0005773;GO:0005634;GO:0031625;GO:0005515;GO:0031386;GO:000372	BP:modification-dependent protein catabolic process;BP:protein ubiquitination;CC:cytoplasm;CC:vacuole;CC:nucleus;MF:ubiquitin protein ligase binding;MF:protein binding;MF:protein tag;MF:mRNA binding;	------	------	------	------	COG5272	O:Posttranslational modification, protein turnover, chaperones	KAF7090568.1	hypothetical protein CFC21_093296 [Triticum aestivum]	sp|Q1EC66|UBQ3_ARATH;	Polyubiquitin 3 OS=Arabidopsis thaliana OX=3702 GN=UBQ3 PE=2 SV=1;	PF00240.25;PF11976.10;PF14560.8;PF18396.3;PF18037.3;PF10302.11	ubiquitin;Rad60-SLD;Ubiquitin_2;TBK1_ULD;Ubiquitin_5;DUF2407	Ubiquitin family;Ubiquitin-2 like Rad60 SUMO-like;Ubiquitin-like domain;TANK binding kinase 1 ubiquitin-like domain;Ubiquitin-like domain;DUF2407 ubiquitin-like domain
TraesCS6D02G247100	2.765	6.7325	6.54583	-	GO:0055085;GO:0016020;GO:0016021;GO:002285	BP:transmembrane transport;CC:membrane;CC:integral component of membrane;MF:transmembrane transporter activity;	K14638	SLC15A3_4, PHT	------	------	COG3104	E:Amino acid transport and metabolism	KAF7090549.1	hypothetical protein CFC21_093281 [Triticum aestivum]	sp|P46032|PTR2_ARATH;	Protein NRT1/ PTR FAMILY 8.3 OS=Arabidopsis thaliana OX=3702 GN=NPF8.3 PE=1 SV=1;	PF00854.23;PF07690.18	PTR2;MFS_1	POT family;Major Facilitator Superfamily
TraesCS6D02G247000	1.88667	5.77083	5.78167	-	GO:0055085;GO:0016020;GO:0016021;GO:002285	BP:transmembrane transport;CC:membrane;CC:integral component of membrane;MF:transmembrane transporter activity;	K14638	SLC15A3_4, PHT	------	------	COG3104	E:Amino acid transport and metabolism	KAF7090550.1	LOW QUALITY PROTEIN: hypothetical protein CFC21_093282 [Triticum aestivum]	sp|P46032|PTR2_ARATH;	Protein NRT1/ PTR FAMILY 8.3 OS=Arabidopsis thaliana OX=3702 GN=NPF8.3 PE=1 SV=1;	PF00854.23	PTR2	POT family
TraesCS6D02G223300	3.89667	8.47083	7.23	-	GO:0006468;GO:0004674;GO:0005524;GO:000467	BP:protein phosphorylation;MF:protein serine/threonine kinase activity;MF:ATP binding;MF:protein kinase activity;	------	------	------	------	COG0515	T:Signal transduction mechanisms	KAF7090239.1	hypothetical protein CFC21_093021 [Triticum aestivum]	sp|Q9LTC0|PBL19_ARATH;	Probable serine/threonine-protein kinase PBL19 OS=Arabidopsis thaliana OX=3702 GN=PBL19 PE=1 SV=1;	PF07714.19;PF00069.27	PK_Tyr_Ser-Thr;Pkinase	Protein tyrosine and serine/threonine kinase;Protein kinase domain
TraesCS6D02G222900	2.15167	5.405	5.79333	-	GO:0043231;GO:0016021;GO:0016020;GO:0020037;GO:0046872;GO:000905	CC:intracellular membrane-bounded organelle;CC:integral component of membrane;CC:membrane;MF:heme binding;MF:metal ion binding;MF:electron carrier activity;	K23490	CYB5	------	------	COG5274;COG5274	C:Energy production and conversion;I:Lipid transport and metabolism	XP_037455625.1	cytochrome b5-like [Triticum dicoccoides]	sp|Q42342|CYB5E_ARATH;	Cytochrome b5 isoform E OS=Arabidopsis thaliana OX=3702 GN=CYTB5-E PE=1 SV=2;	PF00173.30	Cyt-b5	Cytochrome b5-like Heme/Steroid binding domain
TraesCS6D02G209600	4.96833	19.2633	17.1642	-	GO:0003723;GO:0003676;GO:000372	MF:RNA binding;MF:nucleic acid binding;MF:mRNA binding;	K25079	RBM42	------	------	ENOG4111N9B	S:Function unknown	XP_020158346.1	RNA-binding protein 42 [Aegilops tauschii subsp. strangulata]	sp|Q0P5L0|RBM42_BOVIN;	RNA-binding protein 42 OS=Bos taurus OX=9913 GN=RBM42 PE=2 SV=1;	PF00076.24	RRM_1	RNA recognition motif.
TraesCS6D02G199700	3.7	13.9308	11.5292	-	GO:0006376;GO:0005685;GO:000372	BP:mRNA splice site selection;CC:U1 snRNP;MF:mRNA binding;	------	------	------	------	COG5200	A:RNA processing and modification	XP_020173020.1	putative RNA-binding protein Luc7-like 2 isoform X1 [Aegilops tauschii subsp. strangulata]	sp|Q9NQ29|LUC7L_HUMAN;	Putative RNA-binding protein Luc7-like 1 OS=Homo sapiens OX=9606 GN=LUC7L PE=1 SV=1;	PF03194.17	LUC7	LUC7 N_terminus
TraesCS6D02G170600	3.59167	7.54417	6.54167	-	GO:000563	CC:nucleus;	K17602	YLPM1	------	------	ENOG410YIR5	S:Function unknown	KAF7089488.1	hypothetical protein CFC21_092454 [Triticum aestivum]	sp|P0CB49|YLPM1_RAT;	YLP motif-containing protein 1 OS=Rattus norvegicus OX=10116 GN=Ylpm1 PE=1 SV=1;	------	------	------
TraesCS6D02G136600	4.56917	8.24167	9.205	-	GO:0003824;GO:005066	MF:catalytic activity;MF:coenzyme binding;	K09753	CCR	map00940	Phenylpropanoid biosynthesis	COG0451	M:Cell wall/membrane/envelope biogenesis	XP_020160536.1	cinnamoyl-CoA reductase 1 [Aegilops tauschii subsp. strangulata]	sp|A0A059TC02|CCR1_PETHY;	Cinnamoyl-CoA reductase 1 OS=Petunia hybrida OX=4102 GN=CCR1 PE=1 SV=1;	PF01370.23;PF01073.21;PF16363.7;PF13460.8;PF05368.15;PF07993.14;PF02719.17;PF00106.27;PF08659.12	Epimerase;3Beta_HSD;GDP_Man_Dehyd;NAD_binding_10;NmrA;NAD_binding_4;Polysacc_synt_2;adh_short;KR	NAD dependent epimerase/dehydratase family;3-beta hydroxysteroid dehydrogenase/isomerase family;GDP-mannose 4,6 dehydratase;NA;NmrA-like family;Male sterility protein;Polysaccharide biosynthesis protein;short chain dehydrogenase;KR domain
TraesCS6D02G135600	3.175	13.535	10.7958	-	GO:0019538;GO:0034605;GO:0042026;GO:0009408;GO:0005737;GO:0009941;GO:0009570;GO:0005739;GO:0016887;GO:000552	BP:protein metabolic process;BP:cellular response to heat;BP:protein refolding;BP:response to heat;CC:cytoplasm;CC:chloroplast envelope;CC:chloroplast stroma;CC:mitochondrion;MF:ATPase activity;MF:ATP binding;	K03695	clpB	------	------	COG0542	O:Posttranslational modification, protein turnover, chaperones	XP_020156897.1	chaperone protein ClpB3, mitochondrial [Aegilops tauschii subsp. strangulata]	sp|Q0E3C8|CLPB3_ORYSJ;	Chaperone protein ClpB3, mitochondrial OS=Oryza sativa subsp. japonica OX=39947 GN=CLPB3 PE=2 SV=3;	PF07724.16;PF17871.3;PF02861.22;PF00004.31;PF10431.11;PF07728.16;PF13191.8;PF00158.28	AAA_2;AAA_lid_9;Clp_N;AAA;ClpB_D2-small;AAA_5;AAA_16;Sigma54_activat	AAA domain;AAA lid domain;Clp amino terminal domain, pathogenicity island component;ATPase family associated with various cellular activities;C-terminal, D2-small domain, of ClpB protein;AAA domain;AAA ATPase domain;Sigma-54 interaction domain
TraesCS6D02G061000	10.6233	37.8175	25.0017	-	------	------	------	------	------	------	ENOG41106JT	S:Function unknown	XP_020199108.1	uncharacterized protein LOC109784908 [Aegilops tauschii subsp. strangulata]	------	------	------	------	------
TraesCS6D02G060200	3.06	3.6775	5.16417	-	GO:0055085;GO:0016021;GO:0016020;GO:002285	BP:transmembrane transport;CC:integral component of membrane;CC:membrane;MF:transmembrane transporter activity;	K14638	SLC15A3_4, PHT	------	------	COG3104	E:Amino acid transport and metabolism	KAF7088149.1	hypothetical protein CFC21_091290 [Triticum aestivum]	sp|P46032|PTR2_ARATH;	Protein NRT1/ PTR FAMILY 8.3 OS=Arabidopsis thaliana OX=3702 GN=NPF8.3 PE=1 SV=1;	PF00854.23	PTR2	POT family
TraesCS6D02G059300	3.73667	8.93583	8.45083	-	GO:0006355;GO:0005634;GO:000367	BP:regulation of transcription, DNA-templated;CC:nucleus;MF:DNA binding;	------	------	------	------	ENOG41108RN	K:Transcription	KAF7088137.1	hypothetical protein CFC21_091281 [Triticum aestivum]	sp|Q7EZT1|NAC67_ORYSJ;	NAC domain-containing protein 67 OS=Oryza sativa subsp. japonica OX=39947 GN=NAC067 PE=2 SV=1;	PF02365.17	NAM	No apical meristem
TraesCS6B02G456600	0.7	14.0175	17.4458	-	GO:0051087;GO:000551	MF:chaperone binding;MF:protein binding;	------	------	------	------	ENOG410YW7W	S:Function unknown	KAF7087237.1	hypothetical protein CFC21_090436 [Triticum aestivum]	------	------	PF02179.18	BAG	BAG domain
TraesCS6B02G438700	5.55083	23.1175	11.9742	-	GO:0009755;GO:0007275;GO:0045893;GO:000563	BP:hormone-mediated signaling pathway;BP:multicellular organism development;BP:positive regulation of transcription, DNA-templated;CC:nucleus;	K13944	LBD16	------	------	ENOG410YA3N	S:Function unknown	KAF7087033.1	hypothetical protein CFC21_090256 [Triticum aestivum]	sp|Q5UG13|LBD_ORYSJ;	LOB domain-containing protein CRL1 OS=Oryza sativa subsp. japonica OX=39947 GN=CRL1 PE=1 SV=1;	PF03195.16	LOB	Lateral organ boundaries
TraesCS6B02G433700	2.86	10.8692	6.15083	-	GO:004687	MF:metal ion binding;	------	------	------	------	ENOG41107G1	S:Function unknown	KAF7086977.1	hypothetical protein CFC21_090209 [Triticum aestivum]	------	------	------	------	------
TraesCS6B02G374100	0.945	76.5483	53.9083	-	GO:0051259;GO:0006457;GO:0042542;GO:0009651;GO:0009408;GO:0005737;GO:0051082;GO:004362	BP:protein oligomerization;BP:protein folding;BP:response to hydrogen peroxide;BP:response to salt stress;BP:response to heat;CC:cytoplasm;MF:unfolded protein binding;MF:protein self-association;	K13993	HSP20	map04141	Protein processing in endoplasmic reticulum	COG0071	O:Posttranslational modification, protein turnover, chaperones	KAF7086298.1	hypothetical protein CFC21_089603 [Triticum aestivum]	sp|Q6K7E9|HS186_ORYSJ;	18.6 kDa class III heat shock protein OS=Oryza sativa subsp. japonica OX=39947 GN=HSP18.6 PE=2 SV=1;	PF00011.23;PF17886.3	HSP20;ArsA_HSP20	Hsp20/alpha crystallin family;HSP20-like domain found in ArsA
TraesCS6B02G373800	8.9375	24.135	21.2092	-	------	------	------	------	------	------	COG2214;COG0484	O:Posttranslational modification, protein turnover, chaperones;	KAF7086294.1	hypothetical protein CFC21_089600 [Triticum aestivum]	sp|Q5SLW9|DNAJ1_THET8;	Chaperone protein DnaJ 1 OS=Thermus thermophilus;	PF00226.33	DnaJ	DnaJ domain
TraesCS6B02G354400	2.0975	8.17083	7.475	-	GO:0005737;GO:0005886;GO:004362	CC:cytoplasm;CC:plasma membrane;MF:protein self-association;	------	------	------	------	ENOG4111KQ7	S:Function unknown	VAI49851.1	unnamed protein product [Triticum turgidum subsp. durum]	sp|Q8L4N1|PHO34_ARATH;	Universal stress protein PHOS34 OS=Arabidopsis thaliana OX=3702 GN=PHOS34 PE=1 SV=1;	PF00582.28	Usp	Universal stress protein family
TraesCS6B02G348700	2.19417	6.30333	4.165	-	GO:0032259;GO:0016021;GO:000816	BP:methylation;CC:integral component of membrane;MF:methyltransferase activity;	K23870	QUA2, TSD2	------	------	ENOG410Y9W6	S:Function unknown	XP_037451477.1	probable pectin methyltransferase QUA2 [Triticum dicoccoides]	sp|Q9C9Q8|PMTT_ARATH;	Probable pectin methyltransferase QUA2 OS=Arabidopsis thaliana OX=3702 GN=QUA2 PE=1 SV=2;	PF03141.18;PF08241.14;PF13649.8	Methyltransf_29;Methyltransf_11;Methyltransf_25	Putative S-adenosyl-L-methionine-dependent methyltransferase;Methyltransferase domain;Methyltransferase domain
TraesCS6B02G346700	9.39833	229.409	257.118	-	GO:0009408;GO:000697	BP:response to heat;BP:response to osmotic stress;	K13993	HSP20	map04141	Protein processing in endoplasmic reticulum	COG0071	O:Posttranslational modification, protein turnover, chaperones	VAI61108.1	unnamed protein product [Triticum turgidum subsp. durum]	sp|Q6Z7V2|HS24M_ORYSJ;	24.1 kDa heat shock protein, mitochondrial OS=Oryza sativa subsp. japonica OX=39947 GN=HSP24.1 PE=2 SV=1;	PF00011.23;PF17886.3	HSP20;ArsA_HSP20	Hsp20/alpha crystallin family;HSP20-like domain found in ArsA
TraesCS6B02G346300	5.13583	14.4483	9.08	-	------	------	------	------	------	------	ENOG41104IA	S:Function unknown	XP_037454849.1	uncharacterized protein LOC119325203 [Triticum dicoccoides]	------	------	PF05340.14	DUF740	Protein of unknown function
TraesCS6B02G344500	2.83583	7.4275	6.3375	-	GO:0005737;GO:000563	CC:cytoplasm;CC:nucleus;	------	------	------	------	COG2214	O:Posttranslational modification, protein turnover, chaperones	XP_037455415.1	chaperone protein DnaJ-like [Triticum dicoccoides]	sp|Q5SLW9|DNAJ1_THET8;	Chaperone protein DnaJ 1 OS=Thermus thermophilus;	PF00226.33	DnaJ	DnaJ domain
TraesCS6B02G342800	1.82	6.69833	3.66667	RING-type E3 ubiquitin transferase [Source:UniProtKB/TrEMBL;Acc:A0A1D6AK28]	GO:0016567;GO:000484	BP:protein ubiquitination;MF:ubiquitin-protein transferase activity;	------	------	------	------	ENOG410Y3P9	O:Posttranslational modification, protein turnover, chaperones	KAF7085922.1	hypothetical protein CFC21_089288 [Triticum aestivum]	sp|Q5PNY6|PUB21_ARATH;	U-box domain-containing protein 21 OS=Arabidopsis thaliana OX=3702 GN=PUB21 PE=2 SV=1;	PF04564.17;PF11789.10	U-box;zf-Nse	U-box domain;Zinc-finger of the MIZ type in Nse subunit
TraesCS6B02G340500	4.63833	6.57417	5.465	-	------	------	------	------	------	------	ENOG4111E1N	S:Function unknown	KAF7085894.1	hypothetical protein CFC21_089265 [Triticum aestivum]	------	------	------	------	------
[truncated: 505 more rows]

## Sheet: TableS3-5 MEturquois
Gene_id	CK	Al	Mn	Gene_description	GO_id	GO_term	KO_id	KO_name	Pathway_id	Pathway_definition	COG_id	COG_Functional Categories	NR_hit-name	NR_description	Swiss-Prot_hit-name	Swiss-Prot_description	Pfam_id	Domain	Domain description
[truncated: 2,075 more rows]
